# Supplementary material for: In silico metabolic profiling of an Indian cohort refutes the "One-Diet-Fits-All" paradigm in colorectal cancer
Source: Research Square preprint supplement (doi:10.21203/rs.3.rs-8201956/v1), 2025-12-04
Supplement: Supplementary file 1 [file 9bc5b7b956114bfda65d7cdb.xlsx]

## Sheet: Data
				Supplementary Data
				Supplementary Table S1: Cohort Metadata and Sample Information	This table provides the metadata for all 136 samples used in the study. Columns include the NCBI SRA accession number, the BioProject ID from which the sample was sourced, and the assigned study group (CRC or Healthy).
				Supplementary Table S2: Taxonomic Classification Summary	This table details the performance of the Kraken2 taxonomic classification pipeline for each of the 136 samples. Columns include the total number of microbial reads input into Kraken2, the number of reads successfully classified to a taxon, and the resulting classification percentage.
				Supplementary Table S3: Species-Level Relative Abundance	This table contains the Bracken-corrected relative abundance of all detected microbial species for each of the 136 samples. Each row represents a unique species, each column represents a sample, and the values represent the percentage of the microbial community attributed to that species.
				Supplementary Table S4: Predicted Metabolic Fluxes for Individual Samples	This table provides the complete output from the personalized metabolic modeling simulations. It lists the predicted secretion/production flux for key metabolites for each of the 136 samples under all six simulated dietary conditions.
				Supplementary Table S5: Differentially Abundant Species between Cohorts	This table lists the results of the differential abundance analysis performed to identify species that are significantly enriched in either the CRC or Healthy group. Columns include the species name, statistical results (p-value, adjusted p-value), log2 fold change, and the cohort of enrichment.
				Supplementary Table S6: Detailed Log2 Fold Change Statistical Results	This table provides a comprehensive list of all species tested for differential abundance, including their base mean abundance, calculated log2 fold change (LFC), standard error, and associated statistical values. This represents the full, unfiltered output of the statistical analysis.

## Sheet: S1 metadata
Run	Assay.Type	AvgSpotLen	Bases	BioProject	BioSample	BioSampleModel	Bytes	Center.Name	Collection_Date	Consent	DATASTORE.filetype	DATASTORE.provider	DATASTORE.region	env_biome	env_feature	env_material	Experiment	geo_loc_name_country	geo_loc_name_country_continent	geo_loc_name	Host_age	HOST	Instrument	lat_lon	Library.Name	LibraryLayout	LibrarySelection	LibrarySource	Organism	Platform	SRA.Study	Group
SRR8865572	WGS	280	1387793557	PRJNA531273	SAMN11355275	MIMS.me,MIGS/MIMS/MIMARKS.human-gut	602335376	INDIAN INSTITUTE OF SCIENCE EDUCATION AND RESEARCH BHOPAL	2016-12-12	public	fastq,run.zq,sra	gs,ncbi,s3	gs.us-east1,ncbi.public,s3.us-east-1	Human-gut	Human associated habitat	Faeces	SRX5652732	India	Asia	India: Bhopal	59	Homo sapiens	NextSeq 500	23.26 N 77.41 E	S_8	PAIRED	RANDOM	METAGENOMIC	human gut metagenome	ILLUMINA	SRP191395	CRC
SRR8865573	WGS	278	1449671956	PRJNA531273	SAMN11355274	MIMS.me,MIGS/MIMS/MIMARKS.human-gut	626848363	INDIAN INSTITUTE OF SCIENCE EDUCATION AND RESEARCH BHOPAL	2016-12-15	public	fastq,run.zq,sra	gs,ncbi,s3	gs.us-east1,ncbi.public,s3.us-east-1	Human-gut	Human associated habitat	Faeces	SRX5652731	India	Asia	India: Bhopal	66	Homo sapiens	NextSeq 500	23.26 N 77.41 E	S_7	PAIRED	RANDOM	METAGENOMIC	human gut metagenome	ILLUMINA	SRP191395	CRC
SRR8865574	WGS	275	1347588954	PRJNA531273	SAMN11355277	MIMS.me,MIGS/MIMS/MIMARKS.human-gut	591692009	INDIAN INSTITUTE OF SCIENCE EDUCATION AND RESEARCH BHOPAL	2016-11-20	public	fastq,run.zq,sra	gs,ncbi,s3	gs.us-east1,ncbi.public,s3.us-east-1	Human-gut	Human associated habitat	Faeces	SRX5652730	India	Asia	India: Bhopal	58	Homo sapiens	NextSeq 500	23.26 N 77.41 E	S_10	PAIRED	RANDOM	METAGENOMIC	human gut metagenome	ILLUMINA	SRP191395	CRC
SRR8865575	WGS	277	1435043694	PRJNA531273	SAMN11355276	MIMS.me,MIGS/MIMS/MIMARKS.human-gut	622808968	INDIAN INSTITUTE OF SCIENCE EDUCATION AND RESEARCH BHOPAL	2016-12-19	public	fastq,run.zq,sra	gs,ncbi,s3	gs.us-east1,ncbi.public,s3.us-east-1	Human-gut	Human associated habitat	Faeces	SRX5652729	India	Asia	India: Bhopal	60	Homo sapiens	NextSeq 500	23.26 N 77.41 E	S_9	PAIRED	RANDOM	METAGENOMIC	human gut metagenome	ILLUMINA	SRP191395	CRC
SRR8865576	WGS	269	1753239492	PRJNA531273	SAMN11355271	MIMS.me,MIGS/MIMS/MIMARKS.human-gut	748398492	INDIAN INSTITUTE OF SCIENCE EDUCATION AND RESEARCH BHOPAL	2016-11-06	public	fastq,run.zq,sra	gs,ncbi,s3	gs.us-east1,ncbi.public,s3.us-east-1	Human-gut	Human associated habitat	Faeces	SRX5652728	India	Asia	India: Bhopal	58	Homo sapiens	NextSeq 500	23.26 N 77.41 E	S_4	PAIRED	RANDOM	METAGENOMIC	human gut metagenome	ILLUMINA	SRP191395	CRC
SRR8865577	WGS	267	1130086052	PRJNA531273	SAMN11355270	MIMS.me,MIGS/MIMS/MIMARKS.human-gut	508960856	INDIAN INSTITUTE OF SCIENCE EDUCATION AND RESEARCH BHOPAL	2016-10-16	public	fastq,run.zq,sra	gs,ncbi,s3	gs.us-east1,ncbi.public,s3.us-east-1	Human-gut	Human associated habitat	Faeces	SRX5652727	India	Asia	India: Bhopal	71	Homo sapiens	NextSeq 500	23.26 N 77.41 E	S_3	PAIRED	RANDOM	METAGENOMIC	human gut metagenome	ILLUMINA	SRP191395	CRC
SRR8865578	WGS	275	1151783466	PRJNA531273	SAMN11355273	MIMS.me,MIGS/MIMS/MIMARKS.human-gut	500025928	INDIAN INSTITUTE OF SCIENCE EDUCATION AND RESEARCH BHOPAL	2016-12-06	public	fastq,run.zq,sra	gs,ncbi,s3	gs.us-east1,ncbi.public,s3.us-east-1	Human-gut	Human associated habitat	Faeces	SRX5652726	India	Asia	India: Bhopal	62	Homo sapiens	NextSeq 500	23.26 N 77.41 E	S_6	PAIRED	RANDOM	METAGENOMIC	human gut metagenome	ILLUMINA	SRP191395	CRC
SRR8865579	WGS	270	1547957943	PRJNA531273	SAMN11355272	MIMS.me,MIGS/MIMS/MIMARKS.human-gut	663346419	INDIAN INSTITUTE OF SCIENCE EDUCATION AND RESEARCH BHOPAL	2016-12-07	public	fastq,run.zq,sra	gs,ncbi,s3	gs.us-east1,ncbi.public,s3.us-east-1	Human-gut	Human associated habitat	Faeces	SRX5652725	India	Asia	India: Bhopal	54	Homo sapiens	NextSeq 500	23.26 N 77.41 E	S_5	PAIRED	RANDOM	METAGENOMIC	human gut metagenome	ILLUMINA	SRP191395	CRC
SRR8865580	WGS	274	1428270555	PRJNA531273	SAMN11355279	MIMS.me,MIGS/MIMS/MIMARKS.human-gut	615926334	INDIAN INSTITUTE OF SCIENCE EDUCATION AND RESEARCH BHOPAL	2016-05-21	public	fastq,run.zq,sra	gs,ncbi,s3	gs.us-east1,ncbi.public,s3.us-east-1	Human-gut	Human associated habitat	Faeces	SRX5652724	India	Asia	India: Bhopal	67	Homo sapiens	NextSeq 500	23.26 N 77.41 E	S_12	PAIRED	RANDOM	METAGENOMIC	human gut metagenome	ILLUMINA	SRP191395	CRC
SRR8865581	WGS	266	1501226163	PRJNA531273	SAMN11355278	MIMS.me,MIGS/MIMS/MIMARKS.human-gut	641199842	INDIAN INSTITUTE OF SCIENCE EDUCATION AND RESEARCH BHOPAL	2016-11-13	public	fastq,run.zq,sra	gs,ncbi,s3	gs.us-east1,ncbi.public,s3.us-east-1	Human-gut	Human associated habitat	Faeces	SRX5652723	India	Asia	India: Bhopal	71	Homo sapiens	NextSeq 500	23.26 N 77.41 E	S_11	PAIRED	RANDOM	METAGENOMIC	human gut metagenome	ILLUMINA	SRP191395	CRC
SRR8865582	WGS	275	780426560	PRJNA531273	SAMN11355268	MIMS.me,MIGS/MIMS/MIMARKS.human-gut	343136708	INDIAN INSTITUTE OF SCIENCE EDUCATION AND RESEARCH BHOPAL	2016-09-06	public	fastq,run.zq,sra	gs,ncbi,s3	gs.us-east1,ncbi.public,s3.us-east-1	Human-gut	Human associated habitat	Faeces	SRX5652722	India	Asia	India: Bhopal	57	Homo sapiens	NextSeq 500	23.26 N 77.41 E	S_1	PAIRED	RANDOM	METAGENOMIC	human gut metagenome	ILLUMINA	SRP191395	CRC
SRR8865583	WGS	269	920913556	PRJNA531273	SAMN11355269	MIMS.me,MIGS/MIMS/MIMARKS.human-gut	406956763	INDIAN INSTITUTE OF SCIENCE EDUCATION AND RESEARCH BHOPAL	2016-08-20	public	fastq,run.zq,sra	gs,ncbi,s3	gs.us-east1,ncbi.public,s3.us-east-1	Human-gut	Human associated habitat	Faeces	SRX5652721	India	Asia	India: Bhopal	64	Homo sapiens	NextSeq 500	23.26 N 77.41 E	S_2	PAIRED	RANDOM	METAGENOMIC	human gut metagenome	ILLUMINA	SRP191395	CRC
SRR8865584	WGS	276	997921511	PRJNA531273	SAMN11355260	MIMS.me,MIGS/MIMS/MIMARKS.human-gut	444507259	INDIAN INSTITUTE OF SCIENCE EDUCATION AND RESEARCH BHOPAL	2016-11-12	public	fastq,run.zq,sra	gs,ncbi,s3	gs.us-east1,ncbi.public,s3.us-east-1	Human-gut	Human associated habitat	Faeces	SRX5652720	India	Asia	India:Thrissur	75	Homo sapiens	NextSeq 500	10.52 N 76.21 E	S_63	PAIRED	RANDOM	METAGENOMIC	human gut metagenome	ILLUMINA	SRP191395	CRC
SRR8865585	WGS	263	1064744495	PRJNA531273	SAMN11355261	MIMS.me,MIGS/MIMS/MIMARKS.human-gut	499152719	INDIAN INSTITUTE OF SCIENCE EDUCATION AND RESEARCH BHOPAL	2016-11-18	public	fastq,run.zq,sra	gs,ncbi,s3	gs.us-east1,ncbi.public,s3.us-east-1	Human-gut	Human associated habitat	Faeces	SRX5652719	India	Asia	India:Thrissur	58	Homo sapiens	NextSeq 500	10.52 N 76.21 E	S_64	PAIRED	RANDOM	METAGENOMIC	human gut metagenome	ILLUMINA	SRP191395	CRC
SRR8865586	WGS	258	939363261	PRJNA531273	SAMN11355262	MIMS.me,MIGS/MIMS/MIMARKS.human-gut	392998422	INDIAN INSTITUTE OF SCIENCE EDUCATION AND RESEARCH BHOPAL	2016-10-21	public	fastq,run.zq,sra	gs,ncbi,s3	gs.us-east1,ncbi.public,s3.us-east-1	Human-gut	Human associated habitat	Faeces	SRX5652718	India	Asia	India:Thrissur	59	Homo sapiens	NextSeq 500	10.52 N 76.21 E	S_65	PAIRED	RANDOM	METAGENOMIC	human gut metagenome	ILLUMINA	SRP191395	CRC
SRR8865587	WGS	274	1560459053	PRJNA531273	SAMN11355263	MIMS.me,MIGS/MIMS/MIMARKS.human-gut	661921836	INDIAN INSTITUTE OF SCIENCE EDUCATION AND RESEARCH BHOPAL	2016-10-06	public	fastq,run.zq,sra	gs,ncbi,s3	gs.us-east1,ncbi.public,s3.us-east-1	Human-gut	Human associated habitat	Faeces	SRX5652717	India	Asia	India:Thrissur	66	Homo sapiens	NextSeq 500	10.52 N 76.21 E	S_66	PAIRED	RANDOM	METAGENOMIC	human gut metagenome	ILLUMINA	SRP191395	CRC
SRR8865588	WGS	283	661492622	PRJNA531273	SAMN11355264	MIMS.me,MIGS/MIMS/MIMARKS.human-gut	294174487	INDIAN INSTITUTE OF SCIENCE EDUCATION AND RESEARCH BHOPAL	2016-10-16	public	fastq,run.zq,sra	gs,ncbi,s3	gs.us-east1,ncbi.public,s3.us-east-1	Human-gut	Human associated habitat	Faeces	SRX5652716	India	Asia	India:Thrissur	56	Homo sapiens	NextSeq 500	10.52 N 76.21 E	S_67	PAIRED	RANDOM	METAGENOMIC	human gut metagenome	ILLUMINA	SRP191395	CRC
SRR8865589	WGS	275	1040725254	PRJNA531273	SAMN11355265	MIMS.me,MIGS/MIMS/MIMARKS.human-gut	469084982	INDIAN INSTITUTE OF SCIENCE EDUCATION AND RESEARCH BHOPAL	2016-05-23	public	fastq,run.zq,sra	gs,ncbi,s3	gs.us-east1,ncbi.public,s3.us-east-1	Human-gut	Human associated habitat	Faeces	SRX5652715	India	Asia	India: Bhopal	47	Homo sapiens	NextSeq 500	23.26 N 77.41 E	S_68	PAIRED	RANDOM	METAGENOMIC	human gut metagenome	ILLUMINA	SRP191395	CRC
SRR8865590	WGS	274	882523087	PRJNA531273	SAMN11355266	MIMS.me,MIGS/MIMS/MIMARKS.human-gut	384316040	INDIAN INSTITUTE OF SCIENCE EDUCATION AND RESEARCH BHOPAL	2016-06-25	public	fastq,run.zq,sra	gs,ncbi,s3	gs.us-east1,ncbi.public,s3.us-east-1	Human-gut	Human associated habitat	Faeces	SRX5652714	India	Asia	India: Bhopal	53	Homo sapiens	NextSeq 500	23.26 N 77.41 E	S_69	PAIRED	RANDOM	METAGENOMIC	human gut metagenome	ILLUMINA	SRP191395	CRC
SRR8865591	WGS	269	1057890138	PRJNA531273	SAMN11355267	MIMS.me,MIGS/MIMS/MIMARKS.human-gut	471011970	INDIAN INSTITUTE OF SCIENCE EDUCATION AND RESEARCH BHOPAL	2016-08-25	public	fastq,run.zq,sra	gs,ncbi,s3	gs.us-east1,ncbi.public,s3.us-east-1	Human-gut	Human associated habitat	Faeces	SRX5652713	India	Asia	India: Bhopal	61	Homo sapiens	NextSeq 500	23.26 N 77.41 E	S_70	PAIRED	RANDOM	METAGENOMIC	human gut metagenome	ILLUMINA	SRP191395	CRC
SRR8865592	WGS	278	456791391	PRJNA531273	SAMN11355258	MIMS.me,MIGS/MIMS/MIMARKS.human-gut	201450084	INDIAN INSTITUTE OF SCIENCE EDUCATION AND RESEARCH BHOPAL	2016-10-21	public	fastq,run.zq,sra	gs,ncbi,s3	gs.us-east1,ncbi.public,s3.us-east-1	Human-gut	Human associated habitat	Faeces	SRX5652712	India	Asia	India:Thrissur	49	Homo sapiens	NextSeq 500	10.52 N 76.21 E	S_61	PAIRED	RANDOM	METAGENOMIC	human gut metagenome	ILLUMINA	SRP191395	CRC
SRR8865593	WGS	269	1619915370	PRJNA531273	SAMN11355259	MIGS/MIMS/MIMARKS.human-gut,MIMS.me	698195684	INDIAN INSTITUTE OF SCIENCE EDUCATION AND RESEARCH BHOPAL	2016-10-16	public	fastq,run.zq,sra	gs,ncbi,s3	gs.us-east1,ncbi.public,s3.us-east-1	Human-gut	Human associated habitat	Faeces	SRX5652711	India	Asia	India:Thrissur	72	Homo sapiens	NextSeq 500	10.52 N 76.21 E	S_62	PAIRED	RANDOM	METAGENOMIC	human gut metagenome	ILLUMINA	SRP191395	CRC
SRR8865594	WGS	277	1118699109	PRJNA531273	SAMN11355254	MIMS.me,MIGS/MIMS/MIMARKS.human-gut	482232853	INDIAN INSTITUTE OF SCIENCE EDUCATION AND RESEARCH BHOPAL	2016-11-09	public	fastq,run.zq,sra	gs,ncbi,s3	gs.us-east1,ncbi.public,s3.us-east-1	Human-gut	Human associated habitat	Faeces	SRX5652710	India	Asia	India:Thrissur	48	Homo sapiens	NextSeq 500	10.52 N 76.21 E	S_58	PAIRED	RANDOM	METAGENOMIC	human gut metagenome	ILLUMINA	SRP191395	CRC
SRR8865595	WGS	281	1413415112	PRJNA531273	SAMN11355255	MIMS.me,MIGS/MIMS/MIMARKS.human-gut	608649688	INDIAN INSTITUTE OF SCIENCE EDUCATION AND RESEARCH BHOPAL	2016-10-11	public	fastq,run.zq,sra	gs,ncbi,s3	gs.us-east1,ncbi.public,s3.us-east-1	Human-gut	Human associated habitat	Faeces	SRX5652709	India	Asia	India:Thrissur	56	Homo sapiens	NextSeq 500	10.52 N 76.21 E	S_71	PAIRED	RANDOM	METAGENOMIC	human gut metagenome	ILLUMINA	SRP191395	CRC
SRR8865596	WGS	280	1384530792	PRJNA531273	SAMN11355256	MIMS.me,MIGS/MIMS/MIMARKS.human-gut	599688312	INDIAN INSTITUTE OF SCIENCE EDUCATION AND RESEARCH BHOPAL	2016-09-11	public	fastq,run.zq,sra	gs,ncbi,s3	gs.us-east1,ncbi.public,s3.us-east-1	Human-gut	Human associated habitat	Faeces	SRX5652708	India	Asia	India:Thrissur	59	Homo sapiens	NextSeq 500	10.52 N 76.21 E	S_59	PAIRED	RANDOM	METAGENOMIC	human gut metagenome	ILLUMINA	SRP191395	CRC
SRR8865597	WGS	278	1100929747	PRJNA531273	SAMN11355257	MIMS.me,MIGS/MIMS/MIMARKS.human-gut	486667805	INDIAN INSTITUTE OF SCIENCE EDUCATION AND RESEARCH BHOPAL	2016-11-21	public	fastq,run.zq,sra	gs,ncbi,s3	gs.us-east1,ncbi.public,s3.us-east-1	Human-gut	Human associated habitat	Faeces	SRX5652707	India	Asia	India:Thrissur	55	Homo sapiens	NextSeq 500	10.52 N 76.21 E	S_60	PAIRED	RANDOM	METAGENOMIC	human gut metagenome	ILLUMINA	SRP191395	CRC
SRR8865598	WGS	275	3808647004	PRJNA531273	SAMN11355250	MIMS.me,MIGS/MIMS/MIMARKS.human-gut	1627581637	INDIAN INSTITUTE OF SCIENCE EDUCATION AND RESEARCH BHOPAL	2016-11-21	public	fastq,run.zq,sra	gs,ncbi,s3	gs.us-east1,ncbi.public,s3.us-east-1	Human-gut	Human associated habitat	Faeces	SRX5652706	India	Asia	India:Thrissur	62	Homo sapiens	NextSeq 500	10.52 N 76.21 E	S_54	PAIRED	RANDOM	METAGENOMIC	human gut metagenome	ILLUMINA	SRP191395	CRC
SRR8865599	WGS	277	1174245166	PRJNA531273	SAMN11355251	MIMS.me,MIGS/MIMS/MIMARKS.human-gut	509005694	INDIAN INSTITUTE OF SCIENCE EDUCATION AND RESEARCH BHOPAL	2016-11-15	public	fastq,run.zq,sra	gs,ncbi,s3	gs.us-east1,ncbi.public,s3.us-east-1	Human-gut	Human associated habitat	Faeces	SRX5652705	India	Asia	India:Thrissur	65	Homo sapiens	NextSeq 500	10.52 N 76.21 E	S_55	PAIRED	RANDOM	METAGENOMIC	human gut metagenome	ILLUMINA	SRP191395	CRC
SRR8865600	WGS	283	883347281	PRJNA531273	SAMN11355252	MIMS.me,MIGS/MIMS/MIMARKS.human-gut	387278587	INDIAN INSTITUTE OF SCIENCE EDUCATION AND RESEARCH BHOPAL	2016-09-10	public	fastq,run.zq,sra	gs,ncbi,s3	gs.us-east1,ncbi.public,s3.us-east-1	Human-gut	Human associated habitat	Faeces	SRX5652704	India	Asia	India:Thrissur	41	Homo sapiens	NextSeq 500	10.52 N 76.21 E	S_56	PAIRED	RANDOM	METAGENOMIC	human gut metagenome	ILLUMINA	SRP191395	CRC
SRR8865601	WGS	281	984235167	PRJNA531273	SAMN11355253	MIMS.me,MIGS/MIMS/MIMARKS.human-gut	435458309	INDIAN INSTITUTE OF SCIENCE EDUCATION AND RESEARCH BHOPAL	2016-06-15	public	fastq,run.zq,sra	gs,ncbi,s3	gs.us-east1,ncbi.public,s3.us-east-1	Human-gut	Human associated habitat	Faeces	SRX5652703	India	Asia	India:Thrissur	65	Homo sapiens	NextSeq 500	10.52 N 76.21 E	S_57	PAIRED	RANDOM	METAGENOMIC	human gut metagenome	ILLUMINA	SRP191395	CRC
SRR5898908	WGS	252	1344200520	PRJNA397112	SAMN07448979	Metagenome or environmental	644143667	INDIAN INSTITUTE OF SCIENCE EDUCATION AND RESEARCH, BHOPAL	2016-07-20	public	fastq,run.zq,sra	gs,ncbi,s3	gs.us-east1,ncbi.public,s3.us-east-1	Human-gut	Human associated habitat	Faeces	SRX3062684	India	Asia	India: Bhopal	29	Homo sapiens	NextSeq 500	23.26 N 77.41 E	S_12	PAIRED	RANDOM	METAGENOMIC	human gut metagenome	ILLUMINA	SRP114847	Healthy
SRR5898909	WGS	250	773772009	PRJNA397112	SAMN07448978	Metagenome or environmental	371201751	INDIAN INSTITUTE OF SCIENCE EDUCATION AND RESEARCH, BHOPAL	2016-07-20	public	fastq,run.zq,sra	gs,ncbi,s3	gs.us-east1,ncbi.public,s3.us-east-1	Human-gut	Human associated habitat	Faeces	SRX3062683	India	Asia	India: Bhopal	22	Homo sapiens	NextSeq 500	23.26 N 77.41 E	S_11	PAIRED	RANDOM	METAGENOMIC	human gut metagenome	ILLUMINA	SRP114847	Healthy
SRR5898910	WGS	244	2142440783	PRJNA397112	SAMN07448977	Metagenome or environmental	1048032516	INDIAN INSTITUTE OF SCIENCE EDUCATION AND RESEARCH, BHOPAL	2016-07-20	public	fastq,run.zq,sra	gs,ncbi,s3	gs.us-east1,ncbi.public,s3.us-east-1	Human-gut	Human associated habitat	Faeces	SRX3062682	India	Asia	India: Bhopal	24	Homo sapiens	NextSeq 500	23.26 N 77.41 E	S_10	PAIRED	RANDOM	METAGENOMIC	human gut metagenome	ILLUMINA	SRP114847	Healthy
SRR5898911	WGS	256	1316013844	PRJNA397112	SAMN07448976	Metagenome or environmental	634139204	INDIAN INSTITUTE OF SCIENCE EDUCATION AND RESEARCH, BHOPAL	2016-07-20	public	fastq,run.zq,sra	gs,ncbi,s3	gs.us-east1,ncbi.public,s3.us-east-1	Human-gut	Human associated habitat	Faeces	SRX3062681	India	Asia	India: Bhopal	25	Homo sapiens	NextSeq 500	23.26 N 77.41 E	S_9	PAIRED	RANDOM	METAGENOMIC	human gut metagenome	ILLUMINA	SRP114847	Healthy
SRR5898912	WGS	255	1036575018	PRJNA397112	SAMN07448975	Metagenome or environmental	498601258	INDIAN INSTITUTE OF SCIENCE EDUCATION AND RESEARCH, BHOPAL	2016-07-20	public	fastq,run.zq,sra	gs,ncbi,s3	gs.us-east1,ncbi.public,s3.us-east-1	Human-gut	Human associated habitat	Faeces	SRX3062680	India	Asia	India: Bhopal	23	Homo sapiens	NextSeq 500	23.26 N 77.41 E	S_8	PAIRED	RANDOM	METAGENOMIC	human gut metagenome	ILLUMINA	SRP114847	Healthy
SRR5898913	WGS	250	1286730974	PRJNA397112	SAMN07448974	Metagenome or environmental	615243623	INDIAN INSTITUTE OF SCIENCE EDUCATION AND RESEARCH, BHOPAL	2016-07-20	public	fastq,run.zq,sra	gs,ncbi,s3	gs.us-east1,ncbi.public,s3.us-east-1	Human-gut	Human associated habitat	Faeces	SRX3062679	India	Asia	India: Bhopal	21	Homo sapiens	NextSeq 500	23.26 N 77.41 E	S_7	PAIRED	RANDOM	METAGENOMIC	human gut metagenome	ILLUMINA	SRP114847	Healthy
SRR5898914	WGS	246	1545640695	PRJNA397112	SAMN07448973	Metagenome or environmental	738769473	INDIAN INSTITUTE OF SCIENCE EDUCATION AND RESEARCH, BHOPAL	2016-07-20	public	fastq,run.zq,sra	gs,ncbi,s3	gs.us-east1,ncbi.public,s3.us-east-1	Human-gut	Human associated habitat	Faeces	SRX3062678	India	Asia	India: Bhopal	21	Homo sapiens	NextSeq 500	23.26 N 77.41 E	S_6	PAIRED	RANDOM	METAGENOMIC	human gut metagenome	ILLUMINA	SRP114847	Healthy
SRR5898915	WGS	255	1805641762	PRJNA397112	SAMN07448972	Metagenome or environmental	874280271	INDIAN INSTITUTE OF SCIENCE EDUCATION AND RESEARCH, BHOPAL	2016-07-20	public	fastq,run.zq,sra	gs,ncbi,s3	gs.us-east1,ncbi.public,s3.us-east-1	Human-gut	Human associated habitat	Faeces	SRX3062677	India	Asia	India: Bhopal	27	Homo sapiens	NextSeq 500	23.26 N 77.41 E	S_5	PAIRED	RANDOM	METAGENOMIC	human gut metagenome	ILLUMINA	SRP114847	Healthy
SRR5898916	WGS	258	1544836274	PRJNA397112	SAMN07448971	Metagenome or environmental	751737891	INDIAN INSTITUTE OF SCIENCE EDUCATION AND RESEARCH, BHOPAL	2016-07-20	public	fastq,run.zq,sra	gs,ncbi,s3	gs.us-east1,ncbi.public,s3.us-east-1	Human-gut	Human associated habitat	Faeces	SRX3062676	India	Asia	India: Bhopal	21	Homo sapiens	NextSeq 500	23.26 N 77.41 E	S_4	PAIRED	RANDOM	METAGENOMIC	human gut metagenome	ILLUMINA	SRP114847	Healthy
SRR5898917	WGS	261	1387130399	PRJNA397112	SAMN07448970	Metagenome or environmental	669264733	INDIAN INSTITUTE OF SCIENCE EDUCATION AND RESEARCH, BHOPAL	2016-07-20	public	fastq,run.zq,sra	gs,ncbi,s3	gs.us-east1,ncbi.public,s3.us-east-1	Human-gut	Human associated habitat	Faeces	SRX3062675	India	Asia	India: Bhopal	28	Homo sapiens	NextSeq 500	23.26 N 77.41 E	S_3	PAIRED	RANDOM	METAGENOMIC	human gut metagenome	ILLUMINA	SRP114847	Healthy
SRR5898918	WGS	248	673918005	PRJNA397112	SAMN07449041	Metagenome or environmental	331733541	INDIAN INSTITUTE OF SCIENCE EDUCATION AND RESEARCH, BHOPAL	2016-07-20	public	fastq,run.zq,sra	gs,ncbi,s3	gs.us-east1,ncbi.public,s3.us-east-1	Human-gut	Human associated habitat	Faeces	SRX3062674	India	Asia	India:Kasaragod	24	Homo sapiens	NextSeq 500	12.51 N 74.98 E	S_74	PAIRED	RANDOM	METAGENOMIC	human gut metagenome	ILLUMINA	SRP114847	Healthy
SRR5898919	WGS	273	928540586	PRJNA397112	SAMN07449042	Metagenome or environmental	461218158	INDIAN INSTITUTE OF SCIENCE EDUCATION AND RESEARCH, BHOPAL	2016-07-20	public	fastq,run.zq,sra	gs,ncbi,s3	gs.us-east1,ncbi.public,s3.us-east-1	Human-gut	Human associated habitat	Faeces	SRX3062673	India	Asia	India:Kasaragod	25	Homo sapiens	NextSeq 500	12.51 N 74.98 E	S_75	PAIRED	RANDOM	METAGENOMIC	human gut metagenome	ILLUMINA	SRP114847	Healthy
SRR5898920	WGS	259	1203927125	PRJNA397112	SAMN07448980	Metagenome or environmental	595521031	INDIAN INSTITUTE OF SCIENCE EDUCATION AND RESEARCH, BHOPAL	2016-07-20	public	fastq,run.zq,sra	gs,ncbi,s3	gs.us-east1,ncbi.public,s3.us-east-1	Human-gut	Human associated habitat	Faeces	SRX3062672	India	Asia	India: Bhopal	24	Homo sapiens	NextSeq 500	23.26 N 77.41 E	S_13	PAIRED	RANDOM	METAGENOMIC	human gut metagenome	ILLUMINA	SRP114847	Healthy
SRR5898921	WGS	260	1688320620	PRJNA397112	SAMN07448981	Metagenome or environmental	831520952	INDIAN INSTITUTE OF SCIENCE EDUCATION AND RESEARCH, BHOPAL	2016-07-20	public	fastq,run.zq,sra	gs,ncbi,s3	gs.us-east1,ncbi.public,s3.us-east-1	Human-gut	Human associated habitat	Faeces	SRX3062671	India	Asia	India: Bhopal	23	Homo sapiens	NextSeq 500	23.26 N 77.41 E	S_14	PAIRED	RANDOM	METAGENOMIC	human gut metagenome	ILLUMINA	SRP114847	Healthy
SRR5898922	WGS	258	1696663348	PRJNA397112	SAMN07448982	Metagenome or environmental	837846552	INDIAN INSTITUTE OF SCIENCE EDUCATION AND RESEARCH, BHOPAL	2016-07-20	public	fastq,run.zq,sra	gs,ncbi,s3	gs.us-east1,ncbi.public,s3.us-east-1	Human-gut	Human associated habitat	Faeces	SRX3062670	India	Asia	India: Bhopal	26	Homo sapiens	NextSeq 500	23.26 N 77.41 E	S_15	PAIRED	RANDOM	METAGENOMIC	human gut metagenome	ILLUMINA	SRP114847	Healthy
SRR5898923	WGS	248	2103248766	PRJNA397112	SAMN07448983	Metagenome or environmental	1036385656	INDIAN INSTITUTE OF SCIENCE EDUCATION AND RESEARCH, BHOPAL	2016-07-20	public	fastq,run.zq,sra	gs,ncbi,s3	gs.us-east1,ncbi.public,s3.us-east-1	Human-gut	Human associated habitat	Faeces	SRX3062669	India	Asia	India: Bhopal	26	Homo sapiens	NextSeq 500	23.26 N 77.41 E	S_16	PAIRED	RANDOM	METAGENOMIC	human gut metagenome	ILLUMINA	SRP114847	Healthy
SRR5898924	WGS	260	1610417458	PRJNA397112	SAMN07448984	Metagenome or environmental	793559562	INDIAN INSTITUTE OF SCIENCE EDUCATION AND RESEARCH, BHOPAL	2016-07-20	public	fastq,run.zq,sra	gs,ncbi,s3	gs.us-east1,ncbi.public,s3.us-east-1	Human-gut	Human associated habitat	Faeces	SRX3062668	India	Asia	India: Bhopal	25	Homo sapiens	NextSeq 500	23.26 N 77.41 E	S_17	PAIRED	RANDOM	METAGENOMIC	human gut metagenome	ILLUMINA	SRP114847	Healthy
SRR5898925	WGS	260	1327594148	PRJNA397112	SAMN07448985	Metagenome or environmental	655239283	INDIAN INSTITUTE OF SCIENCE EDUCATION AND RESEARCH, BHOPAL	2016-07-20	public	fastq,run.zq,sra	gs,ncbi,s3	gs.us-east1,ncbi.public,s3.us-east-1	Human-gut	Human associated habitat	Faeces	SRX3062667	India	Asia	India: Bhopal	28	Homo sapiens	NextSeq 500	23.26 N 77.41 E	S_18	PAIRED	RANDOM	METAGENOMIC	human gut metagenome	ILLUMINA	SRP114847	Healthy
SRR5898926	WGS	269	802869306	PRJNA397112	SAMN07448986	Metagenome or environmental	399167521	INDIAN INSTITUTE OF SCIENCE EDUCATION AND RESEARCH, BHOPAL	2016-07-20	public	fastq,run.zq,sra	gs,ncbi,s3	gs.us-east1,ncbi.public,s3.us-east-1	Human-gut	Human associated habitat	Faeces	SRX3062666	India	Asia	India: Bhopal	26	Homo sapiens	NextSeq 500	23.26 N 77.41 E	S_19	PAIRED	RANDOM	METAGENOMIC	human gut metagenome	ILLUMINA	SRP114847	Healthy
SRR5898927	WGS	271	882772000	PRJNA397112	SAMN07449040	Metagenome or environmental	439477132	INDIAN INSTITUTE OF SCIENCE EDUCATION AND RESEARCH, BHOPAL	2016-07-20	public	fastq,run.zq,sra	gs,ncbi,s3	gs.us-east1,ncbi.public,s3.us-east-1	Human-gut	Human associated habitat	Faeces	SRX3062665	India	Asia	India:Kasaragod	30	Homo sapiens	NextSeq 500	12.51 N 74.98 E	S_73	PAIRED	RANDOM	METAGENOMIC	human gut metagenome	ILLUMINA	SRP114847	Healthy
SRR5898928	WGS	286	779835379	PRJNA397112	SAMN07449028	Metagenome or environmental	389130812	INDIAN INSTITUTE OF SCIENCE EDUCATION AND RESEARCH, BHOPAL	2016-07-20	public	fastq,run.zq,sra	gs,ncbi,s3	gs.us-east1,ncbi.public,s3.us-east-1	Human-gut	Human associated habitat	Faeces	SRX3062664	India	Asia	India:Kasaragod	6	Homo sapiens	NextSeq 500	12.51 N 74.98 E	S_61	PAIRED	RANDOM	METAGENOMIC	human gut metagenome	ILLUMINA	SRP114847	Healthy
SRR5898929	WGS	271	953285254	PRJNA397112	SAMN07449029	Metagenome or environmental	476267450	INDIAN INSTITUTE OF SCIENCE EDUCATION AND RESEARCH, BHOPAL	2016-07-20	public	fastq,run.zq,sra	gs,ncbi,s3	gs.us-east1,ncbi.public,s3.us-east-1	Human-gut	Human associated habitat	Faeces	SRX3062663	India	Asia	India:Kasaragod	5	Homo sapiens	NextSeq 500	12.51 N 74.98 E	S_62	PAIRED	RANDOM	METAGENOMIC	human gut metagenome	ILLUMINA	SRP114847	Healthy
SRR5898930	WGS	276	1217218776	PRJNA397112	SAMN07449026	Metagenome or environmental	603600937	INDIAN INSTITUTE OF SCIENCE EDUCATION AND RESEARCH, BHOPAL	2016-07-20	public	fastq,run.zq,sra	gs,ncbi,s3	gs.us-east1,ncbi.public,s3.us-east-1	Human-gut	Human associated habitat	Faeces	SRX3062662	India	Asia	India:Kasaragod	12	Homo sapiens	NextSeq 500	12.51 N 74.98 E	S_59	PAIRED	RANDOM	METAGENOMIC	human gut metagenome	ILLUMINA	SRP114847	Healthy
SRR5898931	WGS	260	815464464	PRJNA397112	SAMN07449027	Metagenome or environmental	403271443	INDIAN INSTITUTE OF SCIENCE EDUCATION AND RESEARCH, BHOPAL	2016-07-20	public	fastq,run.zq,sra	gs,ncbi,s3	gs.us-east1,ncbi.public,s3.us-east-1	Human-gut	Human associated habitat	Faeces	SRX3062661	India	Asia	India:Kasaragod	4	Homo sapiens	NextSeq 500	12.51 N 74.98 E	S_60	PAIRED	RANDOM	METAGENOMIC	human gut metagenome	ILLUMINA	SRP114847	Healthy
SRR5898932	WGS	254	1638306780	PRJNA397112	SAMN07449025	Metagenome or environmental	810456968	INDIAN INSTITUTE OF SCIENCE EDUCATION AND RESEARCH, BHOPAL	2016-07-20	public	fastq,run.zq,sra	gs,ncbi,s3	gs.us-east1,ncbi.public,s3.us-east-1	Human-gut	Human associated habitat	Faeces	SRX3062660	India	Asia	India:Kasaragod	16	Homo sapiens	NextSeq 500	12.51 N 74.98 E	S_58	PAIRED	RANDOM	METAGENOMIC	human gut metagenome	ILLUMINA	SRP114847	Healthy
SRR5898933	WGS	267	807853605	PRJNA397112	SAMN07449038	Metagenome or environmental	400242996	INDIAN INSTITUTE OF SCIENCE EDUCATION AND RESEARCH, BHOPAL	2016-07-20	public	fastq,run.zq,sra	gs,ncbi,s3	gs.us-east1,ncbi.public,s3.us-east-1	Human-gut	Human associated habitat	Faeces	SRX3062659	India	Asia	India:Kasaragod	9	Homo sapiens	NextSeq 500	12.51 N 74.98 E	S_71	PAIRED	RANDOM	METAGENOMIC	human gut metagenome	ILLUMINA	SRP114847	Healthy
SRR5898934	WGS	261	1113899152	PRJNA397112	SAMN07449023	Metagenome or environmental	549928496	INDIAN INSTITUTE OF SCIENCE EDUCATION AND RESEARCH, BHOPAL	2016-07-20	public	fastq,run.zq,sra	gs,ncbi,s3	gs.us-east1,ncbi.public,s3.us-east-1	Human-gut	Human associated habitat	Faeces	SRX3062658	India	Asia	India:Kasaragod	12	Homo sapiens	NextSeq 500	12.51 N 74.98 E	S_56	PAIRED	RANDOM	METAGENOMIC	human gut metagenome	ILLUMINA	SRP114847	Healthy
SRR5898935	WGS	254	1175175845	PRJNA397112	SAMN07449024	Metagenome or environmental	580261290	INDIAN INSTITUTE OF SCIENCE EDUCATION AND RESEARCH, BHOPAL	2016-07-20	public	fastq,run.zq,sra	gs,ncbi,s3	gs.us-east1,ncbi.public,s3.us-east-1	Human-gut	Human associated habitat	Faeces	SRX3062657	India	Asia	India:Kasaragod	11	Homo sapiens	NextSeq 500	12.51 N 74.98 E	S_57	PAIRED	RANDOM	METAGENOMIC	human gut metagenome	ILLUMINA	SRP114847	Healthy
SRR5898936	WGS	255	811721817	PRJNA397112	SAMN07449021	Metagenome or environmental	410768215	INDIAN INSTITUTE OF SCIENCE EDUCATION AND RESEARCH, BHOPAL	2016-07-20	public	fastq,run.zq,sra	gs,ncbi,s3	gs.us-east1,ncbi.public,s3.us-east-1	Human-gut	Human associated habitat	Faeces	SRX3062656	India	Asia	India:Kasaragod	7	Homo sapiens	NextSeq 500	12.51 N 74.98 E	S_54	PAIRED	RANDOM	METAGENOMIC	human gut metagenome	ILLUMINA	SRP114847	Healthy
SRR5898937	WGS	255	1411389630	PRJNA397112	SAMN07449022	Metagenome or environmental	695244874	INDIAN INSTITUTE OF SCIENCE EDUCATION AND RESEARCH, BHOPAL	2016-07-20	public	fastq,run.zq,sra	gs,ncbi,s3	gs.us-east1,ncbi.public,s3.us-east-1	Human-gut	Human associated habitat	Faeces	SRX3062655	India	Asia	India:Kasaragod	11	Homo sapiens	NextSeq 500	12.51 N 74.98 E	S_55	PAIRED	RANDOM	METAGENOMIC	human gut metagenome	ILLUMINA	SRP114847	Healthy
SRR5898938	WGS	255	1208556736	PRJNA397112	SAMN07449036	Metagenome or environmental	596020473	INDIAN INSTITUTE OF SCIENCE EDUCATION AND RESEARCH, BHOPAL	2016-07-20	public	fastq,run.zq,sra	gs,ncbi,s3	gs.us-east1,ncbi.public,s3.us-east-1	Human-gut	Human associated habitat	Faeces	SRX3062654	India	Asia	India:Kasaragod	3.5	Homo sapiens	NextSeq 500	12.51 N 74.98 E	S_69	PAIRED	RANDOM	METAGENOMIC	human gut metagenome	ILLUMINA	SRP114847	Healthy
SRR5898939	WGS	258	1227255405	PRJNA397112	SAMN07449037	Metagenome or environmental	604817874	INDIAN INSTITUTE OF SCIENCE EDUCATION AND RESEARCH, BHOPAL	2016-07-20	public	fastq,run.zq,sra	gs,ncbi,s3	gs.us-east1,ncbi.public,s3.us-east-1	Human-gut	Human associated habitat	Faeces	SRX3062653	India	Asia	India:Kasaragod	10	Homo sapiens	NextSeq 500	12.51 N 74.98 E	S_70	PAIRED	RANDOM	METAGENOMIC	human gut metagenome	ILLUMINA	SRP114847	Healthy
SRR5898940	WGS	262	983729077	PRJNA397112	SAMN07449034	Metagenome or environmental	489606449	INDIAN INSTITUTE OF SCIENCE EDUCATION AND RESEARCH, BHOPAL	2016-07-20	public	fastq,run.zq,sra	gs,ncbi,s3	gs.us-east1,ncbi.public,s3.us-east-1	Human-gut	Human associated habitat	Faeces	SRX3062652	India	Asia	India:Kasaragod	9	Homo sapiens	NextSeq 500	12.51 N 74.98 E	S_67	PAIRED	RANDOM	METAGENOMIC	human gut metagenome	ILLUMINA	SRP114847	Healthy
SRR5898941	WGS	260	1410279821	PRJNA397112	SAMN07449035	Metagenome or environmental	696305331	INDIAN INSTITUTE OF SCIENCE EDUCATION AND RESEARCH, BHOPAL	2016-07-20	public	fastq,run.zq,sra	gs,ncbi,s3	gs.us-east1,ncbi.public,s3.us-east-1	Human-gut	Human associated habitat	Faeces	SRX3062651	India	Asia	India:Kasaragod	5	Homo sapiens	NextSeq 500	12.51 N 74.98 E	S_68	PAIRED	RANDOM	METAGENOMIC	human gut metagenome	ILLUMINA	SRP114847	Healthy
SRR5898942	WGS	257	1307661754	PRJNA397112	SAMN07449032	Metagenome or environmental	645476755	INDIAN INSTITUTE OF SCIENCE EDUCATION AND RESEARCH, BHOPAL	2016-07-20	public	fastq,run.zq,sra	gs,ncbi,s3	gs.us-east1,ncbi.public,s3.us-east-1	Human-gut	Human associated habitat	Faeces	SRX3062650	India	Asia	India:Kasaragod	10	Homo sapiens	NextSeq 500	12.51 N 74.98 E	S_65	PAIRED	RANDOM	METAGENOMIC	human gut metagenome	ILLUMINA	SRP114847	Healthy
SRR5898943	WGS	256	812140981	PRJNA397112	SAMN07449033	Metagenome or environmental	402264762	INDIAN INSTITUTE OF SCIENCE EDUCATION AND RESEARCH, BHOPAL	2016-07-20	public	fastq,run.zq,sra	gs,ncbi,s3	gs.us-east1,ncbi.public,s3.us-east-1	Human-gut	Human associated habitat	Faeces	SRX3062649	India	Asia	India:Kasaragod	6	Homo sapiens	NextSeq 500	12.51 N 74.98 E	S_66	PAIRED	RANDOM	METAGENOMIC	human gut metagenome	ILLUMINA	SRP114847	Healthy
SRR5898944	WGS	267	1298220991	PRJNA397112	SAMN07449030	Metagenome or environmental	641492977	INDIAN INSTITUTE OF SCIENCE EDUCATION AND RESEARCH, BHOPAL	2016-07-20	public	fastq,run.zq,sra	gs,ncbi,s3	gs.us-east1,ncbi.public,s3.us-east-1	Human-gut	Human associated habitat	Faeces	SRX3062648	India	Asia	India:Kasaragod	7	Homo sapiens	NextSeq 500	12.51 N 74.98 E	S_63	PAIRED	RANDOM	METAGENOMIC	human gut metagenome	ILLUMINA	SRP114847	Healthy
SRR5898945	WGS	273	1090074858	PRJNA397112	SAMN07449031	Metagenome or environmental	541928857	INDIAN INSTITUTE OF SCIENCE EDUCATION AND RESEARCH, BHOPAL	2016-07-20	public	fastq,run.zq,sra	gs,ncbi,s3	gs.us-east1,ncbi.public,s3.us-east-1	Human-gut	Human associated habitat	Faeces	SRX3062647	India	Asia	India:Kasaragod	12	Homo sapiens	NextSeq 500	12.51 N 74.98 E	S_64	PAIRED	RANDOM	METAGENOMIC	human gut metagenome	ILLUMINA	SRP114847	Healthy
SRR5898946	WGS	254	1400366558	PRJNA397112	SAMN07448968	Metagenome or environmental	676299186	INDIAN INSTITUTE OF SCIENCE EDUCATION AND RESEARCH, BHOPAL	2016-07-20	public	run.zq,sra,fastq	gs,ncbi,s3	gs.us-east1,ncbi.public,s3.us-east-1	Human-gut	Human associated habitat	Faeces	SRX3062646	India	Asia	India: Bhopal	26	Homo sapiens	NextSeq 500	23.26 N 77.41 E	S_1	PAIRED	RANDOM	METAGENOMIC	human gut metagenome	ILLUMINA	SRP114847	Healthy
SRR5898947	WGS	259	1374274716	PRJNA397112	SAMN07448969	Metagenome or environmental	664076677	INDIAN INSTITUTE OF SCIENCE EDUCATION AND RESEARCH, BHOPAL	2016-07-20	public	fastq,run.zq,sra	gs,ncbi,s3	gs.us-east1,ncbi.public,s3.us-east-1	Human-gut	Human associated habitat	Faeces	SRX3062645	India	Asia	India: Bhopal	27	Homo sapiens	NextSeq 500	23.26 N 77.41 E	S_2	PAIRED	RANDOM	METAGENOMIC	human gut metagenome	ILLUMINA	SRP114847	Healthy
SRR5898948	WGS	281	1037368291	PRJNA397112	SAMN07449077	Metagenome or environmental	530294792	INDIAN INSTITUTE OF SCIENCE EDUCATION AND RESEARCH, BHOPAL	2016-07-20	public	fastq,run.zq,sra	gs,ncbi,s3	gs.us-east1,ncbi.public,s3.us-east-1	Human-gut	Human associated habitat	Faeces	SRX3062644	India	Asia	India:Kasaragod	58	Homo sapiens	NextSeq 500	12.51 N 74.98 E	S_110	PAIRED	RANDOM	METAGENOMIC	human gut metagenome	ILLUMINA	SRP114847	Healthy
SRR5898949	WGS	272	1348133665	PRJNA397112	SAMN07449076	Metagenome or environmental	669123014	INDIAN INSTITUTE OF SCIENCE EDUCATION AND RESEARCH, BHOPAL	2016-07-20	public	fastq,run.zq,sra	gs,ncbi,s3	gs.us-east1,ncbi.public,s3.us-east-1	Human-gut	Human associated habitat	Faeces	SRX3062643	India	Asia	India:Kasaragod	30	Homo sapiens	NextSeq 500	12.51 N 74.98 E	S_109	PAIRED	RANDOM	METAGENOMIC	human gut metagenome	ILLUMINA	SRP114847	Healthy
SRR5898950	WGS	283	668018094	PRJNA397112	SAMN07449073	Metagenome or environmental	341347382	INDIAN INSTITUTE OF SCIENCE EDUCATION AND RESEARCH, BHOPAL	2016-07-20	public	fastq,run.zq,sra	gs,ncbi,s3	gs.us-east1,ncbi.public,s3.us-east-1	Human-gut	Human associated habitat	Faeces	SRX3062642	India	Asia	India:Kasaragod	50	Homo sapiens	NextSeq 500	12.51 N 74.98 E	S_106	PAIRED	RANDOM	METAGENOMIC	human gut metagenome	ILLUMINA	SRP114847	Healthy
SRR5898951	WGS	272	1035278491	PRJNA397112	SAMN07449039	Metagenome or environmental	517269758	INDIAN INSTITUTE OF SCIENCE EDUCATION AND RESEARCH, BHOPAL	2016-07-20	public	fastq,run.zq,sra	gs,ncbi,s3	gs.us-east1,ncbi.public,s3.us-east-1	Human-gut	Human associated habitat	Faeces	SRX3062641	India	Asia	India:Kasaragod	52	Homo sapiens	NextSeq 500	12.51 N 74.98 E	S_72	PAIRED	RANDOM	METAGENOMIC	human gut metagenome	ILLUMINA	SRP114847	Healthy
SRR5898952	WGS	274	790582176	PRJNA397112	SAMN07449075	Metagenome or environmental	394788234	INDIAN INSTITUTE OF SCIENCE EDUCATION AND RESEARCH, BHOPAL	2016-07-20	public	fastq,run.zq,sra	gs,ncbi,s3	gs.us-east1,ncbi.public,s3.us-east-1	Human-gut	Human associated habitat	Faeces	SRX3062640	India	Asia	India:Kasaragod	30	Homo sapiens	NextSeq 500	12.51 N 74.98 E	S_108	PAIRED	RANDOM	METAGENOMIC	human gut metagenome	ILLUMINA	SRP114847	Healthy
SRR5898953	WGS	269	1605014657	PRJNA397112	SAMN07449074	Metagenome or environmental	795405191	INDIAN INSTITUTE OF SCIENCE EDUCATION AND RESEARCH, BHOPAL	2016-07-20	public	fastq,run.zq,sra	gs,ncbi,s3	gs.us-east1,ncbi.public,s3.us-east-1	Human-gut	Human associated habitat	Faeces	SRX3062639	India	Asia	India:Kasaragod	27	Homo sapiens	NextSeq 500	12.51 N 74.98 E	S_107	PAIRED	RANDOM	METAGENOMIC	human gut metagenome	ILLUMINA	SRP114847	Healthy
SRR5898954	WGS	282	742418100	PRJNA397112	SAMN07449071	Metagenome or environmental	377873558	INDIAN INSTITUTE OF SCIENCE EDUCATION AND RESEARCH, BHOPAL	2016-07-20	public	fastq,run.zq,sra	gs,ncbi,s3	gs.us-east1,ncbi.public,s3.us-east-1	Human-gut	Human associated habitat	Faeces	SRX3062638	India	Asia	India:Kasaragod	53	Homo sapiens	NextSeq 500	12.51 N 74.98 E	S_104	PAIRED	RANDOM	METAGENOMIC	human gut metagenome	ILLUMINA	SRP114847	Healthy
SRR5898955	WGS	275	942562745	PRJNA397112	SAMN07449070	Metagenome or environmental	469337180	INDIAN INSTITUTE OF SCIENCE EDUCATION AND RESEARCH, BHOPAL	2016-07-20	public	fastq,run.zq,sra	gs,ncbi,s3	gs.us-east1,ncbi.public,s3.us-east-1	Human-gut	Human associated habitat	Faeces	SRX3062637	India	Asia	India:Kasaragod	21	Homo sapiens	NextSeq 500	12.51 N 74.98 E	S_103	PAIRED	RANDOM	METAGENOMIC	human gut metagenome	ILLUMINA	SRP114847	Healthy
SRR5898956	WGS	248	1538114053	PRJNA397112	SAMN07449000	Metagenome or environmental	743868751	INDIAN INSTITUTE OF SCIENCE EDUCATION AND RESEARCH, BHOPAL	2016-07-20	public	fastq,run.zq,sra	gs,ncbi,s3	gs.us-east1,ncbi.public,s3.us-east-1	Human-gut	Human associated habitat	Faeces	SRX3062636	India	Asia	India: Bhopal	29	Homo sapiens	NextSeq 500	23.26 N 77.41 E	S_33	PAIRED	RANDOM	METAGENOMIC	human gut metagenome	ILLUMINA	SRP114847	Healthy
SRR5898957	WGS	274	1081366956	PRJNA397112	SAMN07449072	Metagenome or environmental	539725367	INDIAN INSTITUTE OF SCIENCE EDUCATION AND RESEARCH, BHOPAL	2016-07-20	public	fastq,run.zq,sra	gs,ncbi,s3	gs.us-east1,ncbi.public,s3.us-east-1	Human-gut	Human associated habitat	Faeces	SRX3062635	India	Asia	India:Kasaragod	25	Homo sapiens	NextSeq 500	12.51 N 74.98 E	S_105	PAIRED	RANDOM	METAGENOMIC	human gut metagenome	ILLUMINA	SRP114847	Healthy
SRR5898958	WGS	266	1270682023	PRJNA397112	SAMN07449064	Metagenome or environmental	626302334	INDIAN INSTITUTE OF SCIENCE EDUCATION AND RESEARCH, BHOPAL	2016-07-20	public	fastq,run.zq,sra	gs,ncbi,s3	gs.us-east1,ncbi.public,s3.us-east-1	Human-gut	Human associated habitat	Faeces	SRX3062634	India	Asia	India:Kasaragod	56	Homo sapiens	NextSeq 500	12.51 N 74.98 E	S_97	PAIRED	RANDOM	METAGENOMIC	human gut metagenome	ILLUMINA	SRP114847	Healthy
SRR5898959	WGS	285	689450736	PRJNA397112	SAMN07449063	Metagenome or environmental	352042447	INDIAN INSTITUTE OF SCIENCE EDUCATION AND RESEARCH, BHOPAL	2016-07-20	public	fastq,run.zq,sra	gs,ncbi,s3	gs.us-east1,ncbi.public,s3.us-east-1	Human-gut	Human associated habitat	Faeces	SRX3062633	India	Asia	India:Kasaragod	50	Homo sapiens	NextSeq 500	12.51 N 74.98 E	S_96	PAIRED	RANDOM	METAGENOMIC	human gut metagenome	ILLUMINA	SRP114847	Healthy
SRR5898960	WGS	285	1087495406	PRJNA397112	SAMN07449062	Metagenome or environmental	556158093	INDIAN INSTITUTE OF SCIENCE EDUCATION AND RESEARCH, BHOPAL	2016-07-20	public	fastq,run.zq,sra	gs,ncbi,s3	gs.us-east1,ncbi.public,s3.us-east-1	Human-gut	Human associated habitat	Faeces	SRX3062632	India	Asia	India:Kasaragod	50	Homo sapiens	NextSeq 500	12.51 N 74.98 E	S_95	PAIRED	RANDOM	METAGENOMIC	human gut metagenome	ILLUMINA	SRP114847	Healthy
SRR5898961	WGS	253	1576569058	PRJNA397112	SAMN07448988	Metagenome or environmental	758185388	INDIAN INSTITUTE OF SCIENCE EDUCATION AND RESEARCH, BHOPAL	2016-07-20	public	fastq,run.zq,sra	gs,ncbi,s3	gs.us-east1,ncbi.public,s3.us-east-1	Human-gut	Human associated habitat	Faeces	SRX3062631	India	Asia	India: Bhopal	23	Homo sapiens	NextSeq 500	23.26 N 77.41 E	S_21	PAIRED	RANDOM	METAGENOMIC	human gut metagenome	ILLUMINA	SRP114847	Healthy
SRR5898962	WGS	274	928516286	PRJNA397112	SAMN07449068	Metagenome or environmental	463355385	INDIAN INSTITUTE OF SCIENCE EDUCATION AND RESEARCH, BHOPAL	2016-07-20	public	fastq,run.zq,sra	gs,ncbi,s3	gs.us-east1,ncbi.public,s3.us-east-1	Human-gut	Human associated habitat	Faeces	SRX3062630	India	Asia	India:Kasaragod	60	Homo sapiens	NextSeq 500	12.51 N 74.98 E	S_101	PAIRED	RANDOM	METAGENOMIC	human gut metagenome	ILLUMINA	SRP114847	Healthy
SRR5898963	WGS	270	997201311	PRJNA397112	SAMN07449067	Metagenome or environmental	497797193	INDIAN INSTITUTE OF SCIENCE EDUCATION AND RESEARCH, BHOPAL	2016-07-20	public	fastq,run.zq,sra	gs,ncbi,s3	gs.us-east1,ncbi.public,s3.us-east-1	Human-gut	Human associated habitat	Faeces	SRX3062629	India	Asia	India:Kasaragod	53	Homo sapiens	NextSeq 500	12.51 N 74.98 E	S_100	PAIRED	RANDOM	METAGENOMIC	human gut metagenome	ILLUMINA	SRP114847	Healthy
SRR5898964	WGS	273	993896268	PRJNA397112	SAMN07449066	Metagenome or environmental	496283951	INDIAN INSTITUTE OF SCIENCE EDUCATION AND RESEARCH, BHOPAL	2016-07-20	public	fastq,run.zq,sra	gs,ncbi,s3	gs.us-east1,ncbi.public,s3.us-east-1	Human-gut	Human associated habitat	Faeces	SRX3062628	India	Asia	India:Kasaragod	53	Homo sapiens	NextSeq 500	12.51 N 74.98 E	S_99	PAIRED	RANDOM	METAGENOMIC	human gut metagenome	ILLUMINA	SRP114847	Healthy
SRR5898965	WGS	268	1063103990	PRJNA397112	SAMN07449065	Metagenome or environmental	525165989	INDIAN INSTITUTE OF SCIENCE EDUCATION AND RESEARCH, BHOPAL	2016-07-20	public	fastq,run.zq,sra	gs,ncbi,s3	gs.us-east1,ncbi.public,s3.us-east-1	Human-gut	Human associated habitat	Faeces	SRX3062627	India	Asia	India:Kasaragod	58	Homo sapiens	NextSeq 500	12.51 N 74.98 E	S_98	PAIRED	RANDOM	METAGENOMIC	human gut metagenome	ILLUMINA	SRP114847	Healthy
SRR5898966	WGS	276	1016781080	PRJNA397112	SAMN07448989	Metagenome or environmental	518200188	INDIAN INSTITUTE OF SCIENCE EDUCATION AND RESEARCH, BHOPAL	2016-07-20	public	fastq,run.zq,sra	gs,ncbi,s3	gs.us-east1,ncbi.public,s3.us-east-1	Human-gut	Human associated habitat	Faeces	SRX3062626	India	Asia	India: Bhopal	64	Homo sapiens	NextSeq 500	23.26 N 77.41 E	S_22	PAIRED	RANDOM	METAGENOMIC	human gut metagenome	ILLUMINA	SRP114847	Healthy
SRR5898967	WGS	276	1358498255	PRJNA397112	SAMN07449069	Metagenome or environmental	674425286	INDIAN INSTITUTE OF SCIENCE EDUCATION AND RESEARCH, BHOPAL	2016-07-20	public	fastq,run.zq,sra	gs,ncbi,s3	gs.us-east1,ncbi.public,s3.us-east-1	Human-gut	Human associated habitat	Faeces	SRX3062625	India	Asia	India:Kasaragod	53	Homo sapiens	NextSeq 500	12.51 N 74.98 E	S_102	PAIRED	RANDOM	METAGENOMIC	human gut metagenome	ILLUMINA	SRP114847	Healthy
SRR5898968	WGS	251	811581241	PRJNA397112	SAMN07449009	Metagenome or environmental	389546675	INDIAN INSTITUTE OF SCIENCE EDUCATION AND RESEARCH, BHOPAL	2016-07-20	public	fastq,run.zq,sra	gs,ncbi,s3	gs.us-east1,ncbi.public,s3.us-east-1	Human-gut	Human associated habitat	Faeces	SRX3062624	India	Asia	India: Bhopal	28	Homo sapiens	NextSeq 500	23.26 N 77.41 E	S_42	PAIRED	RANDOM	METAGENOMIC	human gut metagenome	ILLUMINA	SRP114847	Healthy
SRR5898969	WGS	261	1430923840	PRJNA397112	SAMN07449010	Metagenome or environmental	695387528	INDIAN INSTITUTE OF SCIENCE EDUCATION AND RESEARCH, BHOPAL	2016-07-20	public	fastq,run.zq,sra	gs,ncbi,s3	gs.us-east1,ncbi.public,s3.us-east-1	Human-gut	Human associated habitat	Faeces	SRX3062623	India	Asia	India: Bhopal	26	Homo sapiens	NextSeq 500	23.26 N 77.41 E	S_43	PAIRED	RANDOM	METAGENOMIC	human gut metagenome	ILLUMINA	SRP114847	Healthy
SRR5898970	WGS	248	983724460	PRJNA397112	SAMN07449007	Metagenome or environmental	478927842	INDIAN INSTITUTE OF SCIENCE EDUCATION AND RESEARCH, BHOPAL	2016-07-20	public	fastq,run.zq,sra	gs,ncbi,s3	gs.us-east1,ncbi.public,s3.us-east-1	Human-gut	Human associated habitat	Faeces	SRX3062622	India	Asia	India: Bhopal	29	Homo sapiens	NextSeq 500	23.26 N 77.41 E	S_40	PAIRED	RANDOM	METAGENOMIC	human gut metagenome	ILLUMINA	SRP114847	Healthy
SRR5898971	WGS	260	1347474530	PRJNA397112	SAMN07449008	Metagenome or environmental	650217042	INDIAN INSTITUTE OF SCIENCE EDUCATION AND RESEARCH, BHOPAL	2016-07-20	public	fastq,run.zq,sra	gs,ncbi,s3	gs.us-east1,ncbi.public,s3.us-east-1	Human-gut	Human associated habitat	Faeces	SRX3062621	India	Asia	India: Bhopal	30	Homo sapiens	NextSeq 500	23.26 N 77.41 E	S_41	PAIRED	RANDOM	METAGENOMIC	human gut metagenome	ILLUMINA	SRP114847	Healthy
SRR5898972	WGS	253	1575075165	PRJNA397112	SAMN07449005	Metagenome or environmental	761121419	INDIAN INSTITUTE OF SCIENCE EDUCATION AND RESEARCH, BHOPAL	2016-07-20	public	fastq,run.zq,sra	gs,ncbi,s3	gs.us-east1,ncbi.public,s3.us-east-1	Human-gut	Human associated habitat	Faeces	SRX3062620	India	Asia	India: Bhopal	23	Homo sapiens	NextSeq 500	23.26 N 77.41 E	S_38	PAIRED	RANDOM	METAGENOMIC	human gut metagenome	ILLUMINA	SRP114847	Healthy
SRR5898973	WGS	254	954061261	PRJNA397112	SAMN07449006	Metagenome or environmental	461391050	INDIAN INSTITUTE OF SCIENCE EDUCATION AND RESEARCH, BHOPAL	2016-07-20	public	fastq,run.zq,sra	gs,ncbi,s3	gs.us-east1,ncbi.public,s3.us-east-1	Human-gut	Human associated habitat	Faeces	SRX3062619	India	Asia	India: Bhopal	26	Homo sapiens	NextSeq 500	23.26 N 77.41 E	S_39	PAIRED	RANDOM	METAGENOMIC	human gut metagenome	ILLUMINA	SRP114847	Healthy
SRR5898974	WGS	248	1065812419	PRJNA397112	SAMN07449003	Metagenome or environmental	514774172	INDIAN INSTITUTE OF SCIENCE EDUCATION AND RESEARCH, BHOPAL	2016-07-20	public	fastq,run.zq,sra	gs,ncbi,s3	gs.us-east1,ncbi.public,s3.us-east-1	Human-gut	Human associated habitat	Faeces	SRX3062618	India	Asia	India: Bhopal	30	Homo sapiens	NextSeq 500	23.26 N 77.41 E	S_36	PAIRED	RANDOM	METAGENOMIC	human gut metagenome	ILLUMINA	SRP114847	Healthy
SRR5898975	WGS	253	1913605591	PRJNA397112	SAMN07449004	Metagenome or environmental	944163769	INDIAN INSTITUTE OF SCIENCE EDUCATION AND RESEARCH, BHOPAL	2016-07-20	public	fastq,run.zq,sra	gs,ncbi,s3	gs.us-east1,ncbi.public,s3.us-east-1	Human-gut	Human associated habitat	Faeces	SRX3062617	India	Asia	India: Bhopal	2.4	Homo sapiens	NextSeq 500	23.26 N 77.41 E	S_37	PAIRED	RANDOM	METAGENOMIC	human gut metagenome	ILLUMINA	SRP114847	Healthy
SRR5898976	WGS	257	1126014109	PRJNA397112	SAMN07449001	Metagenome or environmental	547200308	INDIAN INSTITUTE OF SCIENCE EDUCATION AND RESEARCH, BHOPAL	2016-07-20	public	fastq,run.zq,sra	gs,ncbi,s3	gs.us-east1,ncbi.public,s3.us-east-1	Human-gut	Human associated habitat	Faeces	SRX3062616	India	Asia	India: Bhopal	22	Homo sapiens	NextSeq 500	23.26 N 77.41 E	S_34	PAIRED	RANDOM	METAGENOMIC	human gut metagenome	ILLUMINA	SRP114847	Healthy
SRR5898977	WGS	258	1862246961	PRJNA397112	SAMN07449002	Metagenome or environmental	898130690	INDIAN INSTITUTE OF SCIENCE EDUCATION AND RESEARCH, BHOPAL	2016-07-20	public	fastq,run.zq,sra	gs,ncbi,s3	gs.us-east1,ncbi.public,s3.us-east-1	Human-gut	Human associated habitat	Faeces	SRX3062615	India	Asia	India: Bhopal	30	Homo sapiens	NextSeq 500	23.26 N 77.41 E	S_35	PAIRED	RANDOM	METAGENOMIC	human gut metagenome	ILLUMINA	SRP114847	Healthy
SRR5898978	WGS	258	1433920763	PRJNA397112	SAMN07448998	Metagenome or environmental	708334131	INDIAN INSTITUTE OF SCIENCE EDUCATION AND RESEARCH, BHOPAL	2016-07-20	public	fastq,run.zq,sra	gs,ncbi,s3	gs.us-east1,ncbi.public,s3.us-east-1	Human-gut	Human associated habitat	Faeces	SRX3062614	India	Asia	India: Bhopal	61	Homo sapiens	NextSeq 500	23.26 N 77.41 E	S_31	PAIRED	RANDOM	METAGENOMIC	human gut metagenome	ILLUMINA	SRP114847	Healthy
SRR5898979	WGS	275	1517224723	PRJNA397112	SAMN07448999	Metagenome or environmental	770328894	INDIAN INSTITUTE OF SCIENCE EDUCATION AND RESEARCH, BHOPAL	2016-07-20	public	fastq,run.zq,sra	gs,ncbi,s3	gs.us-east1,ncbi.public,s3.us-east-1	Human-gut	Human associated habitat	Faeces	SRX3062613	India	Asia	India: Bhopal	58	Homo sapiens	NextSeq 500	23.26 N 77.41 E	S_32	PAIRED	RANDOM	METAGENOMIC	human gut metagenome	ILLUMINA	SRP114847	Healthy
SRR5898980	WGS	281	793309934	PRJNA397112	SAMN07448994	Metagenome or environmental	405931636	INDIAN INSTITUTE OF SCIENCE EDUCATION AND RESEARCH, BHOPAL	2016-07-20	public	fastq,run.zq,sra	gs,ncbi,s3	gs.us-east1,ncbi.public,s3.us-east-1	Human-gut	Human associated habitat	Faeces	SRX3062612	India	Asia	India: Bhopal	52	Homo sapiens	NextSeq 500	23.26 N 77.41 E	S_27	PAIRED	RANDOM	METAGENOMIC	human gut metagenome	ILLUMINA	SRP114847	Healthy
SRR5898981	WGS	279	937125039	PRJNA397112	SAMN07448995	Metagenome or environmental	469037078	INDIAN INSTITUTE OF SCIENCE EDUCATION AND RESEARCH, BHOPAL	2016-07-20	public	fastq,run.zq,sra	gs,ncbi,s3	gs.us-east1,ncbi.public,s3.us-east-1	Human-gut	Human associated habitat	Faeces	SRX3062611	India	Asia	India: Bhopal	62	Homo sapiens	NextSeq 500	23.26 N 77.41 E	S_28	PAIRED	RANDOM	METAGENOMIC	human gut metagenome	ILLUMINA	SRP114847	Healthy
SRR5898982	WGS	273	754584053	PRJNA397112	SAMN07448996	Metagenome or environmental	374726933	INDIAN INSTITUTE OF SCIENCE EDUCATION AND RESEARCH, BHOPAL	2016-07-20	public	fastq,run.zq,sra	gs,ncbi,s3	gs.us-east1,ncbi.public,s3.us-east-1	Human-gut	Human associated habitat	Faeces	SRX3062610	India	Asia	India: Bhopal	50	Homo sapiens	NextSeq 500	23.26 N 77.41 E	S_29	PAIRED	RANDOM	METAGENOMIC	human gut metagenome	ILLUMINA	SRP114847	Healthy
SRR5898983	WGS	282	1363678978	PRJNA397112	SAMN07448997	Metagenome or environmental	681345223	INDIAN INSTITUTE OF SCIENCE EDUCATION AND RESEARCH, BHOPAL	2016-07-20	public	fastq,run.zq,sra	gs,ncbi,s3	gs.us-east1,ncbi.public,s3.us-east-1	Human-gut	Human associated habitat	Faeces	SRX3062609	India	Asia	India: Bhopal	58	Homo sapiens	NextSeq 500	23.26 N 77.41 E	S_30	PAIRED	RANDOM	METAGENOMIC	human gut metagenome	ILLUMINA	SRP114847	Healthy
SRR5898984	WGS	274	1010009755	PRJNA397112	SAMN07448990	Metagenome or environmental	514327393	INDIAN INSTITUTE OF SCIENCE EDUCATION AND RESEARCH, BHOPAL	2016-07-20	public	fastq,run.zq,sra	gs,ncbi,s3	gs.us-east1,ncbi.public,s3.us-east-1	Human-gut	Human associated habitat	Faeces	SRX3062608	India	Asia	India: Bhopal	62	Homo sapiens	NextSeq 500	23.26 N 77.41 E	S_23	PAIRED	RANDOM	METAGENOMIC	human gut metagenome	ILLUMINA	SRP114847	Healthy
SRR5898985	WGS	258	1313430561	PRJNA397112	SAMN07448991	Metagenome or environmental	649048944	INDIAN INSTITUTE OF SCIENCE EDUCATION AND RESEARCH, BHOPAL	2016-07-20	public	fastq,run.zq,sra	gs,ncbi,s3	gs.us-east1,ncbi.public,s3.us-east-1	Human-gut	Human associated habitat	Faeces	SRX3062607	India	Asia	India: Bhopal	57	Homo sapiens	NextSeq 500	23.26 N 77.41 E	S_24	PAIRED	RANDOM	METAGENOMIC	human gut metagenome	ILLUMINA	SRP114847	Healthy
SRR5898986	WGS	271	1256070078	PRJNA397112	SAMN07448992	Metagenome or environmental	638673047	INDIAN INSTITUTE OF SCIENCE EDUCATION AND RESEARCH, BHOPAL	2016-07-20	public	fastq,run.zq,sra	gs,ncbi,s3	gs.us-east1,ncbi.public,s3.us-east-1	Human-gut	Human associated habitat	Faeces	SRX3062606	India	Asia	India: Bhopal	57	Homo sapiens	NextSeq 500	23.26 N 77.41 E	S_25	PAIRED	RANDOM	METAGENOMIC	human gut metagenome	ILLUMINA	SRP114847	Healthy
SRR5898987	WGS	272	914569895	PRJNA397112	SAMN07448993	Metagenome or environmental	456672245	INDIAN INSTITUTE OF SCIENCE EDUCATION AND RESEARCH, BHOPAL	2016-07-20	public	fastq,run.zq,sra	gs,ncbi,s3	gs.us-east1,ncbi.public,s3.us-east-1	Human-gut	Human associated habitat	Faeces	SRX3062605	India	Asia	India: Bhopal	71	Homo sapiens	NextSeq 500	23.26 N 77.41 E	S_26	PAIRED	RANDOM	METAGENOMIC	human gut metagenome	ILLUMINA	SRP114847	Healthy
SRR5898988	WGS	270	1366625440	PRJNA397112	SAMN07449051	Metagenome or environmental	682237822	INDIAN INSTITUTE OF SCIENCE EDUCATION AND RESEARCH, BHOPAL	2016-07-20	public	fastq,run.zq,sra	gs,ncbi,s3	gs.us-east1,ncbi.public,s3.us-east-1	Human-gut	Human associated habitat	Faeces	SRX3062604	India	Asia	India:Kasaragod	26	Homo sapiens	NextSeq 500	12.51 N 74.98 E	S_84	PAIRED	RANDOM	METAGENOMIC	human gut metagenome	ILLUMINA	SRP114847	Healthy
SRR5898989	WGS	276	1071915165	PRJNA397112	SAMN07449050	Metagenome or environmental	534110964	INDIAN INSTITUTE OF SCIENCE EDUCATION AND RESEARCH, BHOPAL	2016-07-20	public	fastq,run.zq,sra	gs,ncbi,s3	gs.us-east1,ncbi.public,s3.us-east-1	Human-gut	Human associated habitat	Faeces	SRX3062603	India	Asia	India:Kasaragod	29	Homo sapiens	NextSeq 500	12.51 N 74.98 E	S_83	PAIRED	RANDOM	METAGENOMIC	human gut metagenome	ILLUMINA	SRP114847	Healthy
SRR5898990	WGS	248	1934829494	PRJNA397112	SAMN07448987	Metagenome or environmental	928178456	INDIAN INSTITUTE OF SCIENCE EDUCATION AND RESEARCH, BHOPAL	2016-07-20	public	fastq,run.zq,sra	gs,ncbi,s3	gs.us-east1,ncbi.public,s3.us-east-1	Human-gut	Human associated habitat	Faeces	SRX3062602	India	Asia	India: Bhopal	23	Homo sapiens	NextSeq 500	23.26 N 77.41 E	S_20	PAIRED	RANDOM	METAGENOMIC	human gut metagenome	ILLUMINA	SRP114847	Healthy
SRR5898991	WGS	267	1036595583	PRJNA397112	SAMN07449043	Metagenome or environmental	514589721	INDIAN INSTITUTE OF SCIENCE EDUCATION AND RESEARCH, BHOPAL	2016-07-20	public	fastq,run.zq,sra	gs,ncbi,s3	gs.us-east1,ncbi.public,s3.us-east-1	Human-gut	Human associated habitat	Faeces	SRX3062601	India	Asia	India:Kasaragod	23	Homo sapiens	NextSeq 500	12.51 N 74.98 E	S_76	PAIRED	RANDOM	METAGENOMIC	human gut metagenome	ILLUMINA	SRP114847	Healthy
SRR5898992	WGS	268	1021345817	PRJNA397112	SAMN07449045	Metagenome or environmental	506623087	INDIAN INSTITUTE OF SCIENCE EDUCATION AND RESEARCH, BHOPAL	2016-07-20	public	fastq,run.zq,sra	gs,ncbi,s3	gs.us-east1,ncbi.public,s3.us-east-1	Human-gut	Human associated habitat	Faeces	SRX3062600	India	Asia	India:Kasaragod	23	Homo sapiens	NextSeq 500	12.51 N 74.98 E	S_78	PAIRED	RANDOM	METAGENOMIC	human gut metagenome	ILLUMINA	SRP114847	Healthy
SRR5898993	WGS	263	859881563	PRJNA397112	SAMN07449044	Metagenome or environmental	429198876	INDIAN INSTITUTE OF SCIENCE EDUCATION AND RESEARCH, BHOPAL	2016-07-20	public	fastq,run.zq,sra	gs,ncbi,s3	gs.us-east1,ncbi.public,s3.us-east-1	Human-gut	Human associated habitat	Faeces	SRX3062599	India	Asia	India:Kasaragod	23	Homo sapiens	NextSeq 500	12.51 N 74.98 E	S_77	PAIRED	RANDOM	METAGENOMIC	human gut metagenome	ILLUMINA	SRP114847	Healthy
SRR5898994	WGS	263	1193418140	PRJNA397112	SAMN07449047	Metagenome or environmental	592354245	INDIAN INSTITUTE OF SCIENCE EDUCATION AND RESEARCH, BHOPAL	2016-07-20	public	fastq,run.zq,sra	gs,ncbi,s3	gs.us-east1,ncbi.public,s3.us-east-1	Human-gut	Human associated habitat	Faeces	SRX3062598	India	Asia	India:Kasaragod	20	Homo sapiens	NextSeq 500	12.51 N 74.98 E	S_80	PAIRED	RANDOM	METAGENOMIC	human gut metagenome	ILLUMINA	SRP114847	Healthy
SRR5898995	WGS	277	670339550	PRJNA397112	SAMN07449046	Metagenome or environmental	334568489	INDIAN INSTITUTE OF SCIENCE EDUCATION AND RESEARCH, BHOPAL	2016-07-20	public	fastq,run.zq,sra	gs,ncbi,s3	gs.us-east1,ncbi.public,s3.us-east-1	Human-gut	Human associated habitat	Faeces	SRX3062597	India	Asia	India:Kasaragod	19	Homo sapiens	NextSeq 500	12.51 N 74.98 E	S_79	PAIRED	RANDOM	METAGENOMIC	human gut metagenome	ILLUMINA	SRP114847	Healthy
SRR5898996	WGS	285	882823784	PRJNA397112	SAMN07449049	Metagenome or environmental	441448806	INDIAN INSTITUTE OF SCIENCE EDUCATION AND RESEARCH, BHOPAL	2016-07-20	public	fastq,run.zq,sra	gs,ncbi,s3	gs.us-east1,ncbi.public,s3.us-east-1	Human-gut	Human associated habitat	Faeces	SRX3062596	India	Asia	India:Kasaragod	30	Homo sapiens	NextSeq 500	12.51 N 74.98 E	S_82	PAIRED	RANDOM	METAGENOMIC	human gut metagenome	ILLUMINA	SRP114847	Healthy
SRR5898997	WGS	261	1753688459	PRJNA397112	SAMN07449048	Metagenome or environmental	872319720	INDIAN INSTITUTE OF SCIENCE EDUCATION AND RESEARCH, BHOPAL	2016-07-20	public	fastq,run.zq,sra	gs,ncbi,s3	gs.us-east1,ncbi.public,s3.us-east-1	Human-gut	Human associated habitat	Faeces	SRX3062595	India	Asia	India:Kasaragod	30	Homo sapiens	NextSeq 500	12.51 N 74.98 E	S_81	PAIRED	RANDOM	METAGENOMIC	human gut metagenome	ILLUMINA	SRP114847	Healthy
SRR5898998	WGS	256	1169300878	PRJNA397112	SAMN07449020	Metagenome or environmental	567757587	INDIAN INSTITUTE OF SCIENCE EDUCATION AND RESEARCH, BHOPAL	2016-07-20	public	fastq,run.zq,sra	gs,ncbi,s3	gs.us-east1,ncbi.public,s3.us-east-1	Human-gut	Human associated habitat	Faeces	SRX3062594	India	Asia	India: Bhopal	29	Homo sapiens	NextSeq 500	23.26 N 77.41 E	S_53	PAIRED	RANDOM	METAGENOMIC	human gut metagenome	ILLUMINA	SRP114847	Healthy
SRR5898999	WGS	254	2432406897	PRJNA397112	SAMN07449019	Metagenome or environmental	1192072963	INDIAN INSTITUTE OF SCIENCE EDUCATION AND RESEARCH, BHOPAL	2016-07-20	public	fastq,run.zq,sra	gs,ncbi,s3	gs.us-east1,ncbi.public,s3.us-east-1	Human-gut	Human associated habitat	Faeces	SRX3062593	India	Asia	India: Bhopal	0.8	Homo sapiens	NextSeq 500	23.26 N 77.41 E	S_52	PAIRED	RANDOM	METAGENOMIC	human gut metagenome	ILLUMINA	SRP114847	Healthy
SRR5899000	WGS	259	1119666721	PRJNA397112	SAMN07449016	Metagenome or environmental	540966794	INDIAN INSTITUTE OF SCIENCE EDUCATION AND RESEARCH, BHOPAL	2016-07-20	public	fastq,run.zq,sra	gs,ncbi,s3	gs.us-east1,ncbi.public,s3.us-east-1	Human-gut	Human associated habitat	Faeces	SRX3062592	India	Asia	India: Bhopal	28	Homo sapiens	NextSeq 500	23.26 N 77.41 E	S_49	PAIRED	RANDOM	METAGENOMIC	human gut metagenome	ILLUMINA	SRP114847	Healthy
SRR5899001	WGS	259	874895400	PRJNA397112	SAMN07449015	Metagenome or environmental	423140878	INDIAN INSTITUTE OF SCIENCE EDUCATION AND RESEARCH, BHOPAL	2016-07-20	public	fastq,run.zq,sra	gs,ncbi,s3	gs.us-east1,ncbi.public,s3.us-east-1	Human-gut	Human associated habitat	Faeces	SRX3062591	India	Asia	India: Bhopal	25	Homo sapiens	NextSeq 500	23.26 N 77.41 E	S_48	PAIRED	RANDOM	METAGENOMIC	human gut metagenome	ILLUMINA	SRP114847	Healthy
SRR5899002	WGS	256	891899754	PRJNA397112	SAMN07449018	Metagenome or environmental	442986164	INDIAN INSTITUTE OF SCIENCE EDUCATION AND RESEARCH, BHOPAL	2016-07-20	public	fastq,run.zq,sra	gs,ncbi,s3	gs.us-east1,ncbi.public,s3.us-east-1	Human-gut	Human associated habitat	Faeces	SRX3062590	India	Asia	India: Bhopal	0.6	Homo sapiens	NextSeq 500	23.26 N 77.41 E	S_51	PAIRED	RANDOM	METAGENOMIC	human gut metagenome	ILLUMINA	SRP114847	Healthy
SRR5899003	WGS	252	1293408913	PRJNA397112	SAMN07449017	Metagenome or environmental	639400877	INDIAN INSTITUTE OF SCIENCE EDUCATION AND RESEARCH, BHOPAL	2016-07-20	public	fastq,run.zq,sra	gs,ncbi,s3	gs.us-east1,ncbi.public,s3.us-east-1	Human-gut	Human associated habitat	Faeces	SRX3062589	India	Asia	India: Bhopal	0.6	Homo sapiens	NextSeq 500	23.26 N 77.41 E	S_50	PAIRED	RANDOM	METAGENOMIC	human gut metagenome	ILLUMINA	SRP114847	Healthy
SRR5899004	WGS	252	1913868247	PRJNA397112	SAMN07449012	Metagenome or environmental	923860306	INDIAN INSTITUTE OF SCIENCE EDUCATION AND RESEARCH, BHOPAL	2016-07-20	public	fastq,run.zq,sra	gs,ncbi,s3	gs.us-east1,ncbi.public,s3.us-east-1	Human-gut	Human associated habitat	Faeces	SRX3062588	India	Asia	India: Bhopal	24	Homo sapiens	NextSeq 500	23.26 N 77.41 E	S_45	PAIRED	RANDOM	METAGENOMIC	human gut metagenome	ILLUMINA	SRP114847	Healthy
SRR5899005	WGS	249	1156488365	PRJNA397112	SAMN07449011	Metagenome or environmental	555697877	INDIAN INSTITUTE OF SCIENCE EDUCATION AND RESEARCH, BHOPAL	2016-07-20	public	fastq,run.zq,sra	gs,ncbi,s3	gs.us-east1,ncbi.public,s3.us-east-1	Human-gut	Human associated habitat	Faeces	SRX3062587	India	Asia	India: Bhopal	30	Homo sapiens	NextSeq 500	23.26 N 77.41 E	S_44	PAIRED	RANDOM	METAGENOMIC	human gut metagenome	ILLUMINA	SRP114847	Healthy
SRR5899006	WGS	249	1677800044	PRJNA397112	SAMN07449014	Metagenome or environmental	808997168	INDIAN INSTITUTE OF SCIENCE EDUCATION AND RESEARCH, BHOPAL	2016-07-20	public	fastq,run.zq,sra	gs,ncbi,s3	gs.us-east1,ncbi.public,s3.us-east-1	Human-gut	Human associated habitat	Faeces	SRX3062586	India	Asia	India: Bhopal	25	Homo sapiens	NextSeq 500	23.26 N 77.41 E	S_47	PAIRED	RANDOM	METAGENOMIC	human gut metagenome	ILLUMINA	SRP114847	Healthy
SRR5899007	WGS	257	1153088906	PRJNA397112	SAMN07449013	Metagenome or environmental	557182455	INDIAN INSTITUTE OF SCIENCE EDUCATION AND RESEARCH, BHOPAL	2016-07-20	public	fastq,run.zq,sra	gs,ncbi,s3	gs.us-east1,ncbi.public,s3.us-east-1	Human-gut	Human associated habitat	Faeces	SRX3062585	India	Asia	India: Bhopal	26	Homo sapiens	NextSeq 500	23.26 N 77.41 E	S_46	PAIRED	RANDOM	METAGENOMIC	human gut metagenome	ILLUMINA	SRP114847	Healthy
SRR5899008	WGS	281	744178266	PRJNA397112	SAMN07449060	Metagenome or environmental	380462541	INDIAN INSTITUTE OF SCIENCE EDUCATION AND RESEARCH, BHOPAL	2016-07-20	public	fastq,run.zq,sra	gs,ncbi,s3	gs.us-east1,ncbi.public,s3.us-east-1	Human-gut	Human associated habitat	Faeces	SRX3062584	India	Asia	India:Kasaragod	60	Homo sapiens	NextSeq 500	12.51 N 74.98 E	S_93	PAIRED	RANDOM	METAGENOMIC	human gut metagenome	ILLUMINA	SRP114847	Healthy
SRR5899009	WGS	286	838823795	PRJNA397112	SAMN07449061	Metagenome or environmental	427941842	INDIAN INSTITUTE OF SCIENCE EDUCATION AND RESEARCH, BHOPAL	2016-07-20	public	fastq,run.zq,sra	gs,ncbi,s3	gs.us-east1,ncbi.public,s3.us-east-1	Human-gut	Human associated habitat	Faeces	SRX3062583	India	Asia	India:Kasaragod	50	Homo sapiens	NextSeq 500	12.51 N 74.98 E	S_94	PAIRED	RANDOM	METAGENOMIC	human gut metagenome	ILLUMINA	SRP114847	Healthy
SRR5899010	WGS	277	835355583	PRJNA397112	SAMN07449054	Metagenome or environmental	415932010	INDIAN INSTITUTE OF SCIENCE EDUCATION AND RESEARCH, BHOPAL	2016-07-20	public	fastq,run.zq,sra	gs,ncbi,s3	gs.us-east1,ncbi.public,s3.us-east-1	Human-gut	Human associated habitat	Faeces	SRX3062582	India	Asia	India:Kasaragod	21	Homo sapiens	NextSeq 500	12.51 N 74.98 E	S_87	PAIRED	RANDOM	METAGENOMIC	human gut metagenome	ILLUMINA	SRP114847	Healthy
SRR5899011	WGS	273	972335134	PRJNA397112	SAMN07449055	Metagenome or environmental	482683805	INDIAN INSTITUTE OF SCIENCE EDUCATION AND RESEARCH, BHOPAL	2016-07-20	public	fastq,run.zq,sra	gs,ncbi,s3	gs.us-east1,ncbi.public,s3.us-east-1	Human-gut	Human associated habitat	Faeces	SRX3062581	India	Asia	India:Kasaragod	30	Homo sapiens	NextSeq 500	12.51 N 74.98 E	S_88	PAIRED	RANDOM	METAGENOMIC	human gut metagenome	ILLUMINA	SRP114847	Healthy
SRR5899012	WGS	278	1059273220	PRJNA397112	SAMN07449052	Metagenome or environmental	529358678	INDIAN INSTITUTE OF SCIENCE EDUCATION AND RESEARCH, BHOPAL	2016-07-20	public	fastq,run.zq,sra	gs,ncbi,s3	gs.us-east1,ncbi.public,s3.us-east-1	Human-gut	Human associated habitat	Faeces	SRX3062580	India	Asia	India:Kasaragod	28	Homo sapiens	NextSeq 500	12.51 N 74.98 E	S_85	PAIRED	RANDOM	METAGENOMIC	human gut metagenome	ILLUMINA	SRP114847	Healthy
SRR5899013	WGS	273	1093824590	PRJNA397112	SAMN07449053	Metagenome or environmental	545354949	INDIAN INSTITUTE OF SCIENCE EDUCATION AND RESEARCH, BHOPAL	2016-07-20	public	fastq,run.zq,sra	gs,ncbi,s3	gs.us-east1,ncbi.public,s3.us-east-1	Human-gut	Human associated habitat	Faeces	SRX3062579	India	Asia	India:Kasaragod	27	Homo sapiens	NextSeq 500	12.51 N 74.98 E	S_86	PAIRED	RANDOM	METAGENOMIC	human gut metagenome	ILLUMINA	SRP114847	Healthy
SRR5899014	WGS	282	998206462	PRJNA397112	SAMN07449058	Metagenome or environmental	513857365	INDIAN INSTITUTE OF SCIENCE EDUCATION AND RESEARCH, BHOPAL	2016-07-20	public	fastq,run.zq,sra	gs,ncbi,s3	gs.us-east1,ncbi.public,s3.us-east-1	Human-gut	Human associated habitat	Faeces	SRX3062578	India	Asia	India:Kasaragod	55	Homo sapiens	NextSeq 500	12.51 N 74.98 E	S_91	PAIRED	RANDOM	METAGENOMIC	human gut metagenome	ILLUMINA	SRP114847	Healthy
SRR5899015	WGS	274	871897218	PRJNA397112	SAMN07449059	Metagenome or environmental	448198526	INDIAN INSTITUTE OF SCIENCE EDUCATION AND RESEARCH, BHOPAL	2016-07-20	public	fastq,run.zq,sra	gs,ncbi,s3	gs.us-east1,ncbi.public,s3.us-east-1	Human-gut	Human associated habitat	Faeces	SRX3062577	India	Asia	India:Kasaragod	55	Homo sapiens	NextSeq 500	12.51 N 74.98 E	S_92	PAIRED	RANDOM	METAGENOMIC	human gut metagenome	ILLUMINA	SRP114847	Healthy
SRR5899016	WGS	270	1373123414	PRJNA397112	SAMN07449056	Metagenome or environmental	685591602	INDIAN INSTITUTE OF SCIENCE EDUCATION AND RESEARCH, BHOPAL	2016-07-20	public	fastq,run.zq,sra	gs,ncbi,s3	gs.us-east1,ncbi.public,s3.us-east-1	Human-gut	Human associated habitat	Faeces	SRX3062576	India	Asia	India:Kasaragod	23	Homo sapiens	NextSeq 500	12.51 N 74.98 E	S_89	PAIRED	RANDOM	METAGENOMIC	human gut metagenome	ILLUMINA	SRP114847	Healthy
SRR5899017	WGS	290	616943354	PRJNA397112	SAMN07449057	Metagenome or environmental	318075921	INDIAN INSTITUTE OF SCIENCE EDUCATION AND RESEARCH, BHOPAL	2016-07-20	public	fastq,run.zq,sra	gs,ncbi,s3	gs.us-east1,ncbi.public,s3.us-east-1	Human-gut	Human associated habitat	Faeces	SRX3062575	India	Asia	India:Kasaragod	50	Homo sapiens	NextSeq 500	12.51 N 74.98 E	S_90	PAIRED	RANDOM	METAGENOMIC	human gut metagenome	ILLUMINA	SRP114847	Healthy

## Sheet: S2 taxonomic classifcation summ
SRA Accession ID	Group	Total Microbial Reads	Number of Classified Reads	Percentage of Classified Reads
SRR16965156	CRC	97497838	94841924	97.28
SRR16965157	CRC	88610034	86220958	97.3
SRR16965158	CRC	91899232	89308034	97.18
SRR16965159	CRC	96654082	94008574	97.26
SRR16965160	CRC	83782192	81399788	97.16
SRR16965161	CRC	80317896	77951006	97.05
SRR16965162	CRC	90277556	87665048	97.11
SRR16965163	CRC	80214570	77934708	97.16
SRR16965164	CRC	91500808	88908812	97.17
SRR16965165	CRC	90757984	88187932	97.17
SRR16965166	CRC	98662496	95864168	97.16
SRR16965167	CRC	92451998	89814424	97.15
SRR16965168	CRC	90108972	87550882	97.16
SRR16965169	CRC	94248554	91630138	97.22
SRR16965170	CRC	85093116	82664530	97.15
SRR16965171	CRC	78819972	76505776	97.06
SRR16965172	CRC	93103762	90466456	97.17
SRR16965173	CRC	89001646	86481744	97.17
SRR16965174	CRC	90124234	87563060	97.16
SRR16965175	CRC	86531380	84061802	97.15
SRR16965176	CRC	80302834	77976860	97.1
SRR16965177	CRC	97395010	94711698	97.24
SRR16965178	CRC	93855584	91238918	97.21
SRR16965179	CRC	96467324	93798544	97.23
SRR16965180	CRC	99933534	97136006	97.2
SRR16965181	CRC	93094892	90457682	97.17
SRR16965182	CRC	89675276	87132034	97.16
SRR16965183	CRC	87884484	85390432	97.16
SRR8865598	Healthy	17172778	16223254	94.47
SRR8865599	Healthy	17711246	16631522	93.9
SRR8865600	Healthy	19177196	18128224	94.53
SRR8865601	Healthy	18820642	17726584	94.19
SRR8865602	Healthy	18944510	17804910	93.98
SRR8865603	Healthy	18635848	17506254	93.94
SRR8865604	Healthy	19008272	17937390	94.37
SRR8865605	Healthy	18228946	17169126	94.19
SRR8865606	Healthy	18991264	17887554	94.19
SRR8865607	Healthy	19251854	18151892	94.29
SRR8865608	Healthy	19457650	18320140	94.15
SRR8865609	Healthy	18939942	17846506	94.23
SRR8865610	Healthy	18830504	17742138	94.22
SRR8865611	Healthy	19069692	17992984	94.35
SRR8865612	Healthy	19102214	17983196	94.14
SRR8865613	Healthy	18449106	17416398	94.4
SRR8865614	Healthy	18619622	17551064	94.26
SRR8865615	Healthy	18967908	17838612	94.05
SRR8865616	Healthy	19064716	17992962	94.38
SRR8865617	Healthy	18751520	17646738	94.11
SRR8865618	Healthy	18386266	17305988	94.12
SRR8865619	Healthy	19011784	17917812	94.25
SRR8865620	Healthy	18873724	17799014	94.31
SRR8865621	Healthy	18706240	17616616	94.18
SRR8865622	Healthy	18821016	17734190	94.22
SRR8865623	Healthy	18883626	17789492	94.21
SRR8865624	Healthy	19253450	18118080	94.1
SRR8865625	Healthy	18843584	17758362	94.24
SRR8865626	Healthy	18964786	17895088	94.36
SRR8865627	Healthy	19119642	18032732	94.32
SRR8865628	Healthy	18991206	17904332	94.28
SRR8865629	Healthy	18742964	17671046	94.28
SRR8865630	Healthy	18822964	17709878	94.09
SRR8865631	Healthy	18915174	17837098	94.3
SRR8865632	Healthy	18849474	17734898	94.09
SRR8865633	Healthy	19230132	18123048	94.24
SRR8865634	Healthy	18849220	17770850	94.28
SRR8865635	Healthy	18943806	17837056	94.16
SRR8865636	Healthy	18805216	17711204	94.18
SRR8865637	Healthy	19054452	17957272	94.24
SRR8865638	Healthy	18856698	17743936	94.1
SRR8865639	Healthy	18698144	17621406	94.24
SRR8865640	Healthy	18836512	17734994	94.15
SRR8865641	Healthy	18729906	17639534	94.18
SRR8865642	Healthy	19047392	17950294	94.24
SRR8865643	Healthy	19011504	17911674	94.22
SRR8865644	Healthy	18809930	17720238	94.21
SRR8865645	Healthy	18960248	17861972	94.21
SRR8865646	Healthy	18967204	17852336	94.12
SRR8865647	Healthy	19176166	18059882	94.18
SRR8865648	Healthy	19098920	18012644	94.31
SRR8865649	Healthy	18790250	17698506	94.19
SRR8865650	Healthy	18890256	17789708	94.17
SRR8865651	Healthy	18956966	17865246	94.24
SRR8865652	Healthy	18737210	17646564	94.18
SRR8865653	Healthy	18960610	17863582	94.22
SRR8865654	Healthy	18928014	17833074	94.21
SRR8865655	Healthy	18807986	17726358	94.25
SRR8865656	Healthy	18816550	17724300	94.19
SRR8865657	Healthy	18974836	17887370	94.27
SRR8865658	Healthy	18814774	17711900	94.14
SRR8865659	Healthy	18924036	17842770	94.29
SRR8865660	Healthy	18884914	17798304	94.25
SRR8865661	Healthy	18868410	17781060	94.24
SRR8865662	Healthy	18987158	17886280	94.2
SRR8865663	Healthy	18977150	17897004	94.31
SRR8865664	Healthy	18840250	17758366	94.26
SRR8865665	Healthy	18991300	17904076	94.28
SRR8865666	Healthy	19100150	18012116	94.3
SRR8865667	Healthy	18635338	17551918	94.19
SRR8865668	Healthy	18706318	17627440	94.23
SRR8865669	Healthy	18721496	17634282	94.2
SRR8865670	Healthy	18922572	17830632	94.23
SRR8865671	Healthy	18972624	17878342	94.23
SRR8865672	Healthy	19008882	17926832	94.31
SRR8865673	Healthy	18881268	17792672	94.24
SRR8865674	Healthy	19047974	17945084	94.21
SRR8865675	Healthy	19028800	17941294	94.28
SRR8865676	Healthy	19119664	18018244	94.24
SRR8865677	Healthy	18836528	17743176	94.2
SRR8865678	Healthy	19043212	17950284	94.26
SRR8865679	Healthy	18903774	17812984	94.23
SRR8865680	Healthy	18973656	17882250	94.25
SRR8865681	Healthy	18730990	17646194	94.21
SRR8865682	Healthy	18855428	17759882	94.19
SRR8865683	Healthy	18790074	17707318	94.24
SRR8865684	Healthy	18883648	17789728	94.21
SRR8865685	Healthy	18833924	17743322	94.21
SRR8865686	Healthy	18778644	17694936	94.23
SRR8865687	Healthy	18701962	17618990	94.21
SRR8865688	Healthy	18917894	17822914	94.21
SRR8865689	Healthy	18870196	17772670	94.18
SRR8865690	Healthy	18873426	17774136	94.18
SRR8865691	Healthy	18915474	17822452	94.22
SRR8865692	Healthy	18898144	17804478	94.21
SRR8865693	Healthy	18925586	17830606	94.21
SRR8865694	Healthy	19044234	17949308	94.25
SRR8865695	Healthy	18884968	17788330	94.19
SRR8865696	Healthy	18816654	17714578	94.14
SRR8865697	Healthy	18905072	17812064	94.22
SRR8865698	Healthy	18888402	17789230	94.18
SRR8865699	Healthy	18944746	17849666	94.22
SRR8865700	Healthy	18924510	17828060	94.21
SRR8865701	Healthy	18813338	17721598	94.19
SRR8865702	Healthy	19001150	17899752	94.2
SRR8865703	Healthy	18916322	17822456	94.22
SRR8865704	Healthy	18875508	17778524	94.19
SRR8865705	Healthy	18820462	17728468	94.2

## Sheet: S3 speices rel abundance
Species	CRC	Healthy	Difference	Status_in_CRC
Segatella copri	0.0915579	0.393278	-0.30172	Lower in CRC
Escherichia coli	0.109442	0.0222792	0.0871633	Higher in CRC
Phocaeicola vulgatus	0.0854986	0.0419662	0.0435323	Higher in CRC
Segatella hominis	0.0104104	0.0370984	-0.026688	Lower in CRC
Bacteroides fragilis	0.0369789	0.011642	0.0253369	Higher in CRC
Klebsiella pneumoniae	0.0264236	0.0146985	0.0117251	Higher in CRC
Bacteroides ovatus	0.0257011	0.0186235	0.00707758	Higher in CRC
Agathobacter rectalis	0.00554107	0.0216803	-0.0161392	Lower in CRC
Akkermansia muciniphila	0.0215814	0.006565	0.0150164	Higher in CRC
Odoribacter splanchnicus	0.0211961	0.00330538	0.0178907	Higher in CRC
Dialister succinatiphilus	0.00796143	0.0214537	-0.0134923	Lower in CRC
Parabacteroides merdae	0.0211068	0.00394774	0.017159	Higher in CRC
Faecalibacterium prausnitzii	0.0122104	0.024548	-0.0123377	Lower in CRC
Bacteroides stercoris	0.0200114	0.00554424	0.0144672	Higher in CRC
Parabacteroides distasonis	0.0183532	0.00527623	0.013077	Higher in CRC
Bifidobacterium longum	0.0154011	0.0047033	0.0106978	Higher in CRC
Alistipes onderdonkii	0.0131639	0.00145594	0.011708	Higher in CRC
Simiaoa sunii	0.0092075	0.0196177	-0.0104102	Lower in CRC
Megasphaera elsdenii	0.00946964	0.0187194	-0.00924979	Lower in CRC
Roseburia faecis	0.00119036	0.0102817	-0.00909134	Lower in CRC
Bacteroides eggerthii	0.0122389	0.000774	0.0114651	Higher in CRC
Phocaeicola dorei	0.00845607	0.0155417	-0.00708563	Lower in CRC
Bacteroides thetaiotaomicron	0.0117096	0.00755925	0.0041504	Higher in CRC
Porphyromonas asaccharolytica	0.00912179	3.08e-05	0.00909094	Higher in CRC
Vescimonas coprocola	0.00802357	0.00406557	0.003958	Higher in CRC
Vescimonas fastidiosa	0.00790929	0.00307028	0.004839	Higher in CRC
Enterobacter cloacae	0.00758393	0.00143359	0.00615034	Higher in CRC
Bacteroides intestinalis	0.00628714	0.000618	0.00566875	Higher in CRC
Bacteroides sp. PHL 2737	0.00613821	0.00180415	0.00433406	Higher in CRC
Veillonella parvula	0.00600607	0.000658	0.00534852	Higher in CRC
Bacteroides cellulosilyticus	0.00577	0.000703	0.0050666	Higher in CRC
Alistipes shahii	0.00554571	0.00343991	0.00210581	Higher in CRC
Flavonifractor plautii	0.00549179	0.00185359	0.0036382	Higher in CRC
Ruthenibacterium lactatiformans	0.00515071	0.00148896	0.00366175	Higher in CRC
Enterobacter hormaechei	0.00501286	0.00140349	0.00360937	Higher in CRC
Bifidobacterium adolescentis	0.00155857	0.00514028	-0.00358171	Lower in CRC
Bacteroides caccae	0.00651857	0.0100631	-0.00354454	Lower in CRC
Paraprevotella clara	0.00484429	0.00166028	0.003184	Higher in CRC
Hungatella hathewayi	0.00462357	0.000455	0.00416876	Higher in CRC
Roseburia intestinalis	0.00225857	0.00557604	-0.00331747	Lower in CRC
Bacteroides uniformis	0.0156575	0.0188839	-0.00322637	Lower in CRC
[Ruminococcus] torques	0.00449893	0.00106226	0.00343666	Higher in CRC
Dialister hominis	0.00287571	0.00593783	-0.00306212	Lower in CRC
Phascolarctobacterium faecium	0.00447964	0.00102359	0.00345606	Higher in CRC
Bifidobacterium catenulatum	0.000681	0.00318066	-0.00249995	Lower in CRC
Lachnospira eligens	0.00257714	0.00493104	-0.00235389	Lower in CRC
Alistipes putredinis	0.0070375	0.00938057	-0.00234307	Lower in CRC
Dialister massiliensis	0.00283143	0.00516783	-0.0023364	Lower in CRC
Bacteroides hominis	0.00396286	0.00175349	0.00220937	Higher in CRC
Bacteroides sp. DH3716P	0.00394643	0.00311132	0.000835	Higher in CRC
Mediterraneibacter gnavus	0.00359536	0.00198387	0.00161149	Higher in CRC
Coprococcus comes	0.00282714	0.00152075	0.00130639	Higher in CRC
Alistipes finegoldii	0.00274857	0.002065	0.000684	Higher in CRC
Ruminococcus bovis	0.000114	0.00190151	-0.00178758	Lower in CRC
Enterobacter asburiae	0.00274214	8.28e-05	0.00265931	Higher in CRC
Ligilactobacillus ruminis	0.000311	0.00203217	-0.0017211	Lower in CRC
Blautia wexlerae	0.00135107	0.00297811	-0.00162704	Lower in CRC
Dysosmobacter welbionis	0.00268179	0.00166877	0.00101301	Higher in CRC
Intestinimonas butyriciproducens	0.00266786	0.00106321	0.00160465	Higher in CRC
Barnesiella intestinihominis	0.00266429	0.00221472	0.00045	Higher in CRC
Megasphaera massiliensis	0.00188857	0.00348047	-0.0015919	Lower in CRC
Faecalibacterium taiwanense	0.00121321	0.00277811	-0.0015649	Lower in CRC
Bifidobacterium pseudocatenulatum	0.000478	0.00203924	-0.00156139	Lower in CRC
Ruminococcus sp. FMBCY1	0.000662	0.00219896	-0.00153682	Lower in CRC
Bacteroides nordii	0.00225429	0.000642	0.00161193	Higher in CRC
Ruminococcus sp. FMB-CY1	0.00120571	0.00260953	-0.00140381	Lower in CRC
Bacteroides salyersiae	0.00225179	0.00109887	0.00115292	Higher in CRC
Enterocloster bolteae	0.002185	0.00100104	0.00118396	Higher in CRC
Ruminococcus champanellensis	0.0021625	0.000181	0.00198118	Higher in CRC
Candidatus Campylobacter infans	0.00212643	2.39e-05	0.00210256	Higher in CRC
Roseburia hominis	0.00182214	0.00308547	-0.00126333	Lower in CRC
Butyricimonas virosa	0.00204286	0.000229	0.00181399	Higher in CRC
Dorea longicatena	0.00134571	0.00252934	-0.00118362	Lower in CRC
Prevotella melaninogenica	0.00199429	0.00107689	0.000917	Higher in CRC
Faecalibacterium sp. I4-3-84	0.000725	0.00182264	-0.001098	Lower in CRC
Parabacteroides johnsonii	0.00192321	0.00062	0.00130274	Higher in CRC
Butyricimonas faecalis	0.00189214	0.000456	0.00143601	Higher in CRC
Acidaminococcus intestini	0.00181964	0.000747	0.00107247	Higher in CRC
Morganella morganii	0.00177393	1.69e-05	0.00175704	Higher in CRC
Collinsella aerofaciens	0.00257393	0.00355	-0.000976	Lower in CRC
Faecalibacterium sp. I3-3-89	0.000558	0.00151764	-0.000959	Lower in CRC
Comamonas kerstersii	0.00165143	0.000792	0.000859	Higher in CRC
Alistipes indistinctus	0.00122786	0.00216802	-0.00094	Lower in CRC
Oscillibacter sp. PEA192	0.00164071	0.00104321	0.000598	Higher in CRC
Bacteroides faecium	0.00159857	0.000267	0.00133131	Higher in CRC
Phocaeicola coprophilus	0.00196714	0.00285425	-0.000887	Lower in CRC
Prevotella intermedia	0.0015125	0.000665	0.000847	Higher in CRC
Claveliimonas bilis	0.00146679	0.000157	0.00130999	Higher in CRC
Faecalibacterium sp. i25-0019-C1	0.0004	0.00124821	-0.000849	Lower in CRC
Salmonella enterica	0.00143964	0.000673	0.000766	Higher in CRC
Dorea formicigenerans	0.00142821	0.000702	0.000726	Higher in CRC
Klebsiella quasipneumoniae	0.000815	0.00164557	-0.000831	Lower in CRC
[Clostridium] scindens	0.00136429	0.000316	0.00104825	Higher in CRC
Enterobacter roggenkampii	0.001345	0.00103359	0.000311	Higher in CRC
Sutterella wadsworthensis	0.000849	0.00163698	-0.000788	Lower in CRC
Blautia sp. SC05B48	0.00132036	0.000333	0.000987	Higher in CRC
Hoylesella buccalis	0.00129107	0.000627	0.000664	Higher in CRC
Desulfovibrio piger	0.00124786	0.000323	0.000925	Higher in CRC
Akkermansia massiliensis	0.00124107	0.000286	0.000955	Higher in CRC
Oscillibacter hominis	0.00122786	0.000576	0.000652	Higher in CRC
Bifidobacterium breve	0.00122071	0.000445	0.000775	Higher in CRC
Paraprevotella xylaniphila	0.00120893	0.000586	0.000623	Higher in CRC
Parabacteroides goldsteinii	0.00117	0.000493	0.000677	Higher in CRC
Veillonella atypica	0.00111214	0.000285	0.000828	Higher in CRC
Bacteroides faecis	0.00110286	0.000467	0.000636	Higher in CRC
Segatella baroniae	0.000355	0.000999	-0.000645	Lower in CRC
Faecalibacterium sp. IP-1-18	0.000674	0.00131642	-0.000642	Lower in CRC
Bacteroides sp. A1C1	0.00108107	0.000631	0.00045	Higher in CRC
Bacteroides sp. CACC 737	0.00104893	0.000366	0.000683	Higher in CRC
[Clostridium] symbiosum	0.00104464	0.000302	0.000743	Higher in CRC
Anaerostipes hadrus	0.000999	0.000443	0.000556	Higher in CRC
Megamonas funiformis	0.00178036	0.00237651	-0.000596	Lower in CRC
Streptococcus salivarius	0.00098	0.000575	0.000405	Higher in CRC
Pusillibacter faecalis	0.000953	0.000462	0.000491	Higher in CRC
Prevotella dentalis	0.000928	0.000694	0.000234	Higher in CRC
Faecalibacterium sp. I4-1-79	0.00138571	0.00193349	-0.000548	Lower in CRC
Succinivibrio dextrinosolvens	0.000218	0.00075	-0.000532	Lower in CRC
Faecalibacterium sp. I3-3-33	0.000646	0.00117764	-0.000531	Lower in CRC
Ruminococcus sp. JL13D9	0.000925	0.000694	0.000231	Higher in CRC
Lawsonibacter asaccharolyticus	0.000898	0.000422	0.000476	Higher in CRC
Streptococcus oralis	0.000891	3.21e-05	0.000859	Higher in CRC
Alistipes senegalensis	0.000885	0.000688	0.000197	Higher in CRC
Parvimonas micra	0.000818	2.32e-05	0.000795	Higher in CRC
Prevotella bivia	0.000804	0.000201	0.000603	Higher in CRC
Phocaeicola salanitronis	0.000803	0.00045	0.000353	Higher in CRC
Citrobacter freundii	0.000789	0.000109	0.00068	Higher in CRC
Bacteroides sp. HF-162	0.000773	0.000635	0.000138	Higher in CRC
Ruminococcus bicirculans (ex Wegman et al. 2014)	0.00191536	0.00234858	-0.000433	Lower in CRC
Bacteroides sp. M10	0.000773	0.000623	0.00015	Higher in CRC
Bacteroides sp. D2	0.000755	0.000656	9.91e-05	Higher in CRC
Prevotella denticola	0.000737	0.000563	0.000174	Higher in CRC
Weissella cibaria	9.29e-06	0.000401	-0.000392	Lower in CRC
Duodenibacillus massiliensis	0.000398	0.000788	-0.00039	Lower in CRC
Faecalibacterium sp. IP-3-29	0.000919	0.00130689	-0.000388	Lower in CRC
Bacteroides finegoldii	0.000515	0.000892	-0.000377	Lower in CRC
Alistipes communis	0.00154607	0.00191793	-0.000372	Lower in CRC
Faecalibacterium sp. i21-0019-B1	0.00111643	0.00148698	-0.000371	Lower in CRC
Eisenbergiella porci	0.000712	0.000599	0.000113	Higher in CRC
Prevotella corporis	0.000704	0.000378	0.000326	Higher in CRC
Xylanibacter ruminicola	0.000697	0.000467	0.00023	Higher in CRC
Prevotella communis	0.000695	0.000438	0.000258	Higher in CRC
Enterocloster clostridioformis	0.000406	0.000755	-0.000349	Lower in CRC
Prevotella nigrescens	0.000675	0.000228	0.000447	Higher in CRC
Treponema succinifaciens	0.000668	0.000581	8.71e-05	Higher in CRC
Streptococcus parasanguinis	0.000665	0.000135	0.00053	Higher in CRC
Weissella confusa	9e-05	0.000411	-0.000321	Lower in CRC
Bacteroides sp. KFT8	0.000633	0.000357	0.000276	Higher in CRC
Ruminococcus sp. JE7B6	0.000633	0.000385	0.000248	Higher in CRC
Enterococcus avium	0.000631	3.5e-05	0.000596	Higher in CRC
Butyricimonas faecihominis	0.000627	0.000257	0.00037	Higher in CRC
Prevotella sp. Rep29	0.000621	0.000325	0.000296	Higher in CRC
Catenibacterium sp. co_0103	0.000525	0.000827	-0.000302	Lower in CRC
[Ruminococcus] lactaris	0.000325	0.000626	-0.0003	Lower in CRC
Klebsiella variicola	0.00066	0.00096	-0.0003	Lower in CRC
Limosilactobacillus mucosae	0.000616	4.68e-05	0.000569	Higher in CRC
Coprococcus catus	0.000612	0.000444	0.000168	Higher in CRC
Bacteroides sp. MSB163	0.000609	0.000183	0.000426	Higher in CRC
Enterococcus faecium	0.000598	9.51e-05	0.000503	Higher in CRC
Bifidobacterium bifidum	0.000606	0.000885	-0.000279	Lower in CRC
Parabacteroides absconsus	0.000596	0.000409	0.000187	Higher in CRC
Acidaminococcus fermentans	0.000583	0.000288	0.000296	Higher in CRC
Prevotella sp. E13-17	0.000566	0.000328	0.000239	Higher in CRC
Sodaliphilus pleomorphus	0.000551	0.000246	0.000305	Higher in CRC
Prevotella sp. E15-22	0.000549	0.000283	0.000266	Higher in CRC
Bacteroides caecimuris	0.000523	0.000268	0.000255	Higher in CRC
Pseudoflavonifractor gallinarum	0.000509	0.000262	0.000248	Higher in CRC
Bacteroides xylanisolvens	0.0188946	0.019147	-0.000252	Lower in CRC
Enterobacter mori	0.000506	2.63e-05	0.000479	Higher in CRC
Veillonella rogosae	0.000504	0.000194	0.000311	Higher in CRC
Prevotella sp. E9-3	0.000497	0.000321	0.000176	Higher in CRC
Blautia obeum	0.00144607	0.00168689	-0.000241	Lower in CRC
Flintibacter sp. KGMB00164	0.000495	0.000224	0.00027	Higher in CRC
Limosilactobacillus fermentum	0.000491	1.51e-05	0.000476	Higher in CRC
Bacteroides humanifaecis	0.000683	0.000921	-0.000238	Lower in CRC
Lactobacillus crispatus	0.000481	0.000165	0.000316	Higher in CRC
Clostridium sp. M62/1	0.000481	0.000342	0.000139	Higher in CRC
Alistipes ihumii	0.000476	0.000126	0.000351	Higher in CRC
Prevotella jejuni	0.000465	0.000401	6.41e-05	Higher in CRC
Segatella oris	0.000454	0.000326	0.000128	Higher in CRC
Bacillus cereus	0.00044	9.92e-05	0.00034	Higher in CRC
Butyricimonas paravirosa	0.000439	0.000188	0.00025	Higher in CRC
Barnesiella sp. An22	0.000433	0.000239	0.000194	Higher in CRC
Prevotella multiformis	0.00043	0.000385	4.47e-05	Higher in CRC
Fusobacterium vincentii	0.000426	5.09e-06	0.000421	Higher in CRC
Faecalibacterium sp. I2-3-92	0.000768	0.000977	-0.000209	Lower in CRC
Akkermansia sp. BCRC 18949	0.000419	9.37e-05	0.000326	Higher in CRC
Eubacterium ventriosum	0.000221	0.000429	-0.000208	Lower in CRC
Prevotella sp. oral taxon 475	0.000419	0.000212	0.000206	Higher in CRC
Bifidobacterium faecale	7.86e-05	0.000281	-0.000203	Lower in CRC
Prevotella sp. E2-28	0.000412	0.000255	0.000157	Higher in CRC
Roseburia rectibacter	0.000371	0.000572	-0.000201	Lower in CRC
Sellimonas catena	0.000406	0.000204	0.000202	Higher in CRC
Anaerobutyricum hallii	0.000403	0.000393	9.46e-06	Higher in CRC
Owariibacterium komagatae	0.000403	0.000203	0.000199	Higher in CRC
Prevotella fusca	0.000398	0.000259	0.000139	Higher in CRC
Clostridioides difficile	0.000397	0.000222	0.000175	Higher in CRC
uncultured Alistipes sp.	0.000384	0.00015	0.000234	Higher in CRC
Eshraghiella crossota	0.00361571	0.00380906	-0.000193	Lower in CRC
Romboutsia ilealis	2.29e-05	0.000212	-0.000189	Lower in CRC
Porphyromonas endodontalis	0.000381	2.53e-05	0.000356	Higher in CRC
Anaerotruncus colihominis	0.000374	0.00022	0.000155	Higher in CRC
Eubacterium sp. MSJ-33	0.000371	0.000215	0.000156	Higher in CRC
Enterocloster asparagiformis	0.000369	0.000343	2.64e-05	Higher in CRC
Parabacteroides sp. CT06	0.000361	0.000241	0.00012	Higher in CRC
Rothia mucilaginosa	0.000352	7.16e-05	0.00028	Higher in CRC
Bacteroides luhongzhouii	0.000348	0.000262	8.6e-05	Higher in CRC
Prevotella herbatica	0.000344	0.000209	0.000135	Higher in CRC
Dialister pneumosintes	0.000339	2.35e-05	0.000315	Higher in CRC
Klebsiella aerogenes	0.000278	0.000451	-0.000173	Lower in CRC
Enterobacter kobei	0.000338	6.39e-05	0.000274	Higher in CRC
Pseudoprevotella muciniphila	0.000336	0.000164	0.000172	Higher in CRC
Bifidobacterium sp. KRGSERBCFTRI	0	0.000171	-0.000171	Lower in CRC
Shigella flexneri	0.000824	0.000995	-0.000171	Lower in CRC
Eubacterium ramulus	0.000333	0.000249	8.39e-05	Higher in CRC
Hoylesella enoeca	0.000331	0.000304	2.77e-05	Higher in CRC
Muribaculum gordoncarteri	0.000321	0.000139	0.000182	Higher in CRC
Shigella boydii	0.000319	0.00011	0.000209	Higher in CRC
Bifidobacterium angulatum	3.39e-05	0.000196	-0.000162	Lower in CRC
Sutterella faecalis	0.000458	0.000618	-0.00016	Lower in CRC
Bacteroides zoogleoformans	0.000318	0.000166	0.000152	Higher in CRC
Porphyromonas somerae	0.000311	2.52e-05	0.000286	Higher in CRC
Faecalibacterium wellingii	0.000688	0.000844	-0.000156	Lower in CRC
Bacteroides sp. CG01	0.00031	0.000112	0.000198	Higher in CRC
Bacteroides heparinolyticus	0.00031	0.000138	0.000172	Higher in CRC
Blautia coccoides	0.000309	0.000175	0.000134	Higher in CRC
Blautia hydrogenotrophica	0.000287	0.000102	0.000185	Higher in CRC
Enterococcus faecalis	0.000284	4.54e-05	0.000239	Higher in CRC
Aeromonas caviae	0.000281	9.81e-06	0.000272	Higher in CRC
Coprococcus eutactus	0.000502	0.000648	-0.000146	Lower in CRC
Faecalibacterium duncaniae	0.00205464	0.00219858	-0.000144	Lower in CRC
Barnesiella viscericola	0.000276	0.00014	0.000136	Higher in CRC
Paramuribaculum intestinale	0.000274	9.69e-05	0.000177	Higher in CRC
Fusobacterium mortiferum	0.00027	3.98e-05	0.00023	Higher in CRC
Alistipes sp. dk3624	0.000269	0.000229	4.02e-05	Higher in CRC
Duncaniella dubosii	0.000255	8.68e-05	0.000168	Higher in CRC
Pyramidobacter piscolens	0.000254	2.45e-05	0.00023	Higher in CRC
[Clostridium] hylemonae	0.000252	5.38e-05	0.000198	Higher in CRC
Bacteroides helcogenes	0.000248	0.000135	0.000112	Higher in CRC
Muribaculum intestinale	0.000246	8.95e-05	0.000157	Higher in CRC
Solobacterium moorei	0.000243	2.71e-05	0.000216	Higher in CRC
Proteus mirabilis	0.000241	1.05e-05	0.000231	Higher in CRC
Prevotella sp. oral taxon 299	0.00024	0.000104	0.000136	Higher in CRC
Fusobacterium nucleatum	0.000237	2.38e-05	0.000213	Higher in CRC
Holdemania massiliensis	0.000153	0.000278	-0.000126	Lower in CRC
Cetobacterium somerae	0.000234	9.06e-06	0.000225	Higher in CRC
Parafannyhessea umbonata	0.000232	0.00015	8.17e-05	Higher in CRC
Clostridium perfringens	0.000232	0.000174	5.78e-05	Higher in CRC
Wujia chipingensis	0.00119679	0.00131802	-0.000121	Lower in CRC
Pseudomonas aeruginosa	0.000227	0.000154	7.3e-05	Higher in CRC
Campylobacter jejuni	0.000224	5.63e-05	0.000168	Higher in CRC
Streptococcus infantarius	3.57e-05	0.000155	-0.000119	Lower in CRC
Megasphaera stantonii	0.000225	0.000344	-0.000119	Lower in CRC
Lactobacillus acidophilus	2.14e-06	0.000121	-0.000119	Lower in CRC
Thomasclavelia ramosa	0.000224	0.000146	7.81e-05	Higher in CRC
Agathobaculum sp. NTUH-O15-33	0.000221	0.00012	0.000101	Higher in CRC
Coprococcus sp. ART55/1	0.00142893	0.00154547	-0.000117	Lower in CRC
Granulicatella adiacens	0.000217	2.25e-05	0.000195	Higher in CRC
Bifidobacterium animalis	0.000213	0.000178	3.5e-05	Higher in CRC
Streptococcus pasteurianus	0.000212	0.000144	6.81e-05	Higher in CRC
Veillonella dispar	0.000209	0.000147	6.16e-05	Higher in CRC
Butyrivibrio fibrisolvens	0.000199	9.9e-05	0.0001	Higher in CRC
Solibaculum mannosilyticum	0.000199	7.53e-05	0.000123	Higher in CRC
Blautia hansenii	0.000199	0.000122	7.63e-05	Higher in CRC
Lactobacillus helveticus	0.000198	1.42e-05	0.000184	Higher in CRC
Oxalobacter aliiformigenes	0.000198	0.000105	9.28e-05	Higher in CRC
Parabacteroides chongii	0.000198	8.04e-05	0.000117	Higher in CRC
Faecalibacillus intestinalis	6.21e-05	0.000163	-0.000101	Lower in CRC
Adlercreutzia equolifaciens	3.71e-05	0.000137	-0.0001	Lower in CRC
Bifidobacterium pseudolongum	0.000191	2.58e-05	0.000165	Higher in CRC
Enterocloster lavalensis	0.000187	9.72e-05	9e-05	Higher in CRC
Prevotella scopos	0.000184	0.000145	3.89e-05	Higher in CRC
Mediterraneibacter glycyrrhizinilyticus	0.000182	9.74e-05	8.44e-05	Higher in CRC
Acutalibacter muris	0.00018	7.23e-05	0.000108	Higher in CRC
Roseburia sp. 499	0.00018	0.000171	8.79e-06	Higher in CRC
Pseudocitrobacter corydidari	0.000179	2.64e-06	0.000176	Higher in CRC
Prevotella histicola	0.000179	0.000145	3.37e-05	Higher in CRC
Klebsiella oxytoca	0.000172	2.31e-05	0.000149	Higher in CRC
Marvinbryantia formatexigens	0.000169	8.24e-05	8.62e-05	Higher in CRC
Porphyromonas gingivalis	0.000169	0.000102	6.71e-05	Higher in CRC
Veillonella sp. S12025-13	0.000167	0.000113	5.35e-05	Higher in CRC
Kineothrix sp. IPX-CK	0.000166	6.43e-05	0.000101	Higher in CRC
Segatella bryantii	0.000675	0.00076	-8.52e-05	Lower in CRC
Faecalimonas umbilicata	0.000165	6.37e-05	0.000102	Higher in CRC
Adlercreutzia hattorii	3.07e-05	0.000116	-8.51e-05	Lower in CRC
Streptococcus mitis	0.000162	3.21e-05	0.00013	Higher in CRC
Cruoricaptor ignavus	0.000161	1.08e-05	0.000151	Higher in CRC
Alistipes sp. i18-0019-D1	0.000161	0.000117	4.44e-05	Higher in CRC
Petrimonas mucosa	0.000160357	8.91e-05	7.13e-05	Higher in CRC
Buchnera aphidicola	0.000159	0.000109	4.99e-05	Higher in CRC
Veillonella nakazawae	0.000159	0.000101	5.73e-05	Higher in CRC
Ruminococcus albus	0.000154	6.8e-05	8.59e-05	Higher in CRC
Massilistercora timonensis	0.000153	7.92e-05	7.37e-05	Higher in CRC
Clostridium sp. C1	0.000151	3.88e-05	0.000112	Higher in CRC
Enterobacter ludwigii	0.00015	2.88e-05	0.000121	Higher in CRC
Agathobaculum massiliense	0.000148	9.59e-05	5.23e-05	Higher in CRC
uncultured Subdoligranulum sp.	0.000478	0.000553	-7.51e-05	Lower in CRC
Megasphaera hexanoica	0.000478	0.000553	-7.51e-05	Lower in CRC
Enterococcus gallinarum	0.000148	6.23e-06	0.000141	Higher in CRC
Eggerthella lenta	0.000133	0.000208	-7.48e-05	Lower in CRC
Streptococcus lactarius	0.000148	2.36e-05	0.000124	Higher in CRC
Turicimonas muris	5.43e-05	0.000129	-7.43e-05	Lower in CRC
Collinsella sp. i05-0019-G5	0.000311	0.000385	-7.42e-05	Lower in CRC
Alistipes dispar	0.000147	7.27e-05	7.4e-05	Higher in CRC
Cronobacter sakazakii	2.39e-05	9.77e-05	-7.38e-05	Lower in CRC
Parolsenella catena	0.000145	0.00013	1.49e-05	Higher in CRC
Parabacteroides faecis	0.000143	6.98e-05	7.27e-05	Higher in CRC
Bacteroides graminisolvens	0.000142	7.31e-05	6.87e-05	Higher in CRC
Eggerthella guodeyinii	3.07e-05	0.000104	-7.32e-05	Lower in CRC
Paenibacillus polymyxa	0.00014	5.24e-05	8.76e-05	Higher in CRC
Ligilactobacillus salivarius	0.00014	0.000106	3.34e-05	Higher in CRC
Streptococcus sp. LPB0220	0.000139	3e-05	0.000109	Higher in CRC
Pseudomonas putida	0.000139	6.95e-05	6.98e-05	Higher in CRC
Enterobacter cloacae complex sp. ECNIH7	0.000139	3.49e-06	0.000135	Higher in CRC
Blautia parvula	0.000139	7.83e-05	6.03e-05	Higher in CRC
Staphylococcus aureus	0.000138	0.000115	2.27e-05	Higher in CRC
Subdoligranulum variabile	0.000455	0.000524	-6.98e-05	Lower in CRC
Eubacterium callanderi	0.000138	0.000129	8.78e-06	Higher in CRC
Ethanoligenens harbinense	0.000138	6.47e-05	7.31e-05	Higher in CRC
Intestinibacillus sp. NTUH-41-i26	0.000136	9e-05	4.61e-05	Higher in CRC
Candidatus Nanosynbacter sp. HMT-352	0.000136	0.000101	3.47e-05	Higher in CRC
Caproicibacterium amylolyticum	0.000135	8.07e-05	5.47e-05	Higher in CRC
Limosilactobacillus vaginalis	0.000135	4.15e-06	0.000131	Higher in CRC
Tannerella serpentiformis	0.000134	5.04e-05	8.36e-05	Higher in CRC
Bifidobacterium dentium	5.71e-05	0.000124	-6.7e-05	Lower in CRC
Escherichia albertii	0.000134	9.32e-05	4.07e-05	Higher in CRC
Chordicoccus furentiruminis	0.000133	5.95e-05	7.33e-05	Higher in CRC
Citrobacter portucalensis	0.000131	3.45e-05	9.65e-05	Higher in CRC
uncultured Bacteroides sp.	0.000129643	6.53e-05	6.44e-05	Higher in CRC
Blautia massiliensis (ex Durand et al. 2017)	0.000128	0	0.000128	Higher in CRC
Bacteroides sedimenti	0.000128	6.95e-05	5.8e-05	Higher in CRC
Catenibacterium mitsuokai	0.000518	0.000583	-6.47e-05	Lower in CRC
Streptococcus suis	0.000128	8.8e-05	3.95e-05	Higher in CRC
Enterococcus casseliflavus	0.000126	3.58e-06	0.000122	Higher in CRC
Sellimonas intestinalis	0.000123	9.21e-05	3.11e-05	Higher in CRC
Blautia producta	0.000123	7.73e-05	4.56e-05	Higher in CRC
Escherichia fergusonii	0.000122	3.98e-05	8.23e-05	Higher in CRC
Aristaeella hokkaidonensis	0.00012	5.45e-05	6.55e-05	Higher in CRC
Streptococcus lingualis	0.000119	3.25e-05	8.67e-05	Higher in CRC
Tannerella forsythia	0.000119	3.76e-05	8.13e-05	Higher in CRC
Bengtsoniella intestinalis	0.000119	5.37e-05	6.52e-05	Higher in CRC
Kineothrix sp. MB12-C1	0.000119	5.08e-05	6.78e-05	Higher in CRC
Streptococcus sp. D7B5	0.000118	1.23e-06	0.000117	Higher in CRC
Coprobacter secundus	0.000171	0.000232	-6.09e-05	Lower in CRC
Blautia pseudococcoides	0.000118	5.79e-05	5.99e-05	Higher in CRC
Shigella dysenteriae	0.000118	9.81e-05	1.94e-05	Higher in CRC
Bacteroides zhangwenhongii	0.000265	0.000324	-5.93e-05	Lower in CRC
Acidovorax sp. BLS4	0.000116	4.84e-05	6.8e-05	Higher in CRC
Monoglobus pectinilyticus	0.000115	3.87e-05	7.67e-05	Higher in CRC
Klebsiella michiganensis	0.000114	4.25e-05	7.17e-05	Higher in CRC
Aristaeella lactis	0.000114	4.92e-05	6.5e-05	Higher in CRC
Intestinibacter bartlettii	7.39e-05	0.00013	-5.63e-05	Lower in CRC
Maliibacterium massiliense	0.000114	4.88e-05	6.52e-05	Higher in CRC
Turicibacter bilis	2.14e-06	5.78e-05	-5.57e-05	Lower in CRC
Citrobacter youngae	0.000114	1.51e-06	0.000112	Higher in CRC
Shigella sonnei	0.000112	7.08e-05	4.1e-05	Higher in CRC
Roseburia sp. 831b	0.00035	0.000405	-5.48e-05	Lower in CRC
Citrobacter pasteurii	0.000111	1.42e-06	0.000109	Higher in CRC
Caproiciproducens sp. CPB-2	0.000111	4.78e-05	6.29e-05	Higher in CRC
Lacrimispora saccharolytica	0.000109	7.08e-05	3.77e-05	Higher in CRC
Enterobacter sp. ECC-219	1.64e-05	6.98e-05	-5.34e-05	Lower in CRC
Clostridium botulinum	0.000108	7.52e-05	3.3e-05	Higher in CRC
Lacrimispora sp. HJ-01	0.000105	4.31e-05	6.19e-05	Higher in CRC
Alistipes megaguti	0.000321	0.000373	-5.19e-05	Lower in CRC
Agrobacterium tumefaciens	0.000105	4.95e-05	5.51e-05	Higher in CRC
Enterococcus raffinosus	0.000104	4.53e-06	9.94e-05	Higher in CRC
Novisyntrophococcus fermenticellae	0.000104	5.43e-05	4.92e-05	Higher in CRC
Kluyvera ascorbata	0.000103	3.15e-05	7.17e-05	Higher in CRC
Phascolarctobacterium sp. Marseille-Q4147	0.000259	0.000308	-4.89e-05	Lower in CRC
Porphyromonas sp. oral taxon 275	0.000103	4e-05	6.32e-05	Higher in CRC
Sutterella megalosphaeroides	0.000103	2.91e-05	7.38e-05	Higher in CRC
Christensenella sp. MSJ-20	0.000103	3.14e-05	7.14e-05	Higher in CRC
Wansuia hejianensis	0.000103	6.04e-05	4.21e-05	Higher in CRC
Paenibacillus sp. CAA11	0.0001	1.63e-05	8.37e-05	Higher in CRC
Blautia argi	0.0001	5.77e-05	4.23e-05	Higher in CRC
Corynebacterium amycolatum	2.96e-05	7.7e-05	-4.73e-05	Lower in CRC
Brucella sp. 1315	0	4.72e-05	-4.72e-05	Lower in CRC
Christensenella minuta	9.93e-05	3.65e-05	6.28e-05	Higher in CRC
Blautia luti	0.000359	0.000406	-4.69e-05	Lower in CRC
Caproicibacterium lactatifermentans	9.75e-05	2.25e-05	7.5e-05	Higher in CRC
Coprobacter fastidiosus	9.75e-05	5.26e-05	4.49e-05	Higher in CRC
Streptomyces vinaceusdrappus	0	4.57e-05	-4.57e-05	Lower in CRC
Petrimonas sp.	9.71e-05	2.93e-05	6.78e-05	Higher in CRC
Schaalia sp. HMT-172	9.68e-05	6.3e-05	3.38e-05	Higher in CRC
Streptococcus anginosus	9.25e-05	1.26e-05	7.99e-05	Higher in CRC
Qiania dongpingensis	9.21e-05	4.51e-05	4.7e-05	Higher in CRC
Caproicibacter sp. BJN0012	9.04e-05	3.43e-05	5.6e-05	Higher in CRC
Ornithobacterium rhinotracheale	9e-05	2.77e-05	6.23e-05	Higher in CRC
Fusobacterium animalis	8.96e-05	2.29e-05	6.67e-05	Higher in CRC
Acinetobacter baumannii	8.93e-05	4.97e-05	3.96e-05	Higher in CRC
Butyrivibrio sp. JL13D10	8.86e-05	5.05e-05	3.81e-05	Higher in CRC
Streptococcus pneumoniae	8.75e-05	3.94e-05	4.81e-05	Higher in CRC
Citrobacter sp. RHBSTW-00137	8.57e-05	0	8.57e-05	Higher in CRC
Streptococcus sp. FSL W8-0197	8.57e-05	5.66e-07	8.51e-05	Higher in CRC
Stomatobaculum sp. F0698	8.25e-05	3.75e-05	4.5e-05	Higher in CRC
Citrobacter braakii	8.18e-05	1.84e-05	6.34e-05	Higher in CRC
Phascolarctobacterium succinatutens	0.000213	0.000255	-4.23e-05	Lower in CRC
Ruminococcus gauvreauii	8.18e-05	4.3e-05	3.88e-05	Higher in CRC
Desulfovibrio desulfuricans	8.07e-05	4.24e-05	3.84e-05	Higher in CRC
Streptococcus agalactiae	8e-05	4.44e-05	3.56e-05	Higher in CRC
Christensenella massiliensis	7.93e-05	4.51e-05	3.42e-05	Higher in CRC
Bacillus thuringiensis	7.93e-05	6.74e-05	1.19e-05	Higher in CRC
Butyrivibrio proteoclasticus	7.89e-05	4.22e-05	3.68e-05	Higher in CRC
Serratia marcescens	7.86e-05	2.33e-05	5.53e-05	Higher in CRC
Romboutsia sp. 13368	1.11e-05	5.2e-05	-4.09e-05	Lower in CRC
Clostridium sp. SY8519	7.79e-05	4.82e-05	2.96e-05	Higher in CRC
Enterobacter sp. JJBC	7.64e-05	1.89e-06	7.45e-05	Higher in CRC
uncultured Acetobacteroides sp.	7.61e-05	2.67e-05	4.94e-05	Higher in CRC
Enterobacter bugandensis	6.93e-05	0.00011	-4.02e-05	Lower in CRC
Blattabacterium cuenoti	7.57e-05	4.42e-05	3.15e-05	Higher in CRC
Lactonifactor longoviformis	7.54e-05	4.16e-05	3.38e-05	Higher in CRC
Gemella morbillorum	7.18e-05	7.17e-06	6.46e-05	Higher in CRC
Sellimonas caecigallum	7.14e-05	4.31e-05	2.83e-05	Higher in CRC
Emergencia sp. JLR.KK010	7.11e-05	2.58e-05	4.52e-05	Higher in CRC
Caproicibacter fermentans	7.11e-05	3.14e-05	3.97e-05	Higher in CRC
Stenotrophomonas maltophilia	7.04e-05	3.29e-05	3.74e-05	Higher in CRC
Rhizobium leguminosarum	6.96e-05	2.14e-05	4.82e-05	Higher in CRC
Pseudobutyrivibrio xylanivorans	6.96e-05	5.34e-05	1.62e-05	Higher in CRC
Streptococcus lutetiensis	6.86e-05	1.47e-05	5.39e-05	Higher in CRC
Porphyromonas cangingivalis	6.86e-05	2.43e-05	4.42e-05	Higher in CRC
uncultured Draconibacterium sp.	6.86e-05	2.79e-05	4.06e-05	Higher in CRC
Lacrimispora sp. JR3	6.71e-05	3.79e-05	2.92e-05	Higher in CRC
Bradyrhizobium sp. WBAH10	0	3.72e-05	-3.72e-05	Lower in CRC
Corynebacterium argentoratense	6.68e-05	1.32e-06	6.55e-05	Higher in CRC
Lacrimispora xylanisolvens	6.61e-05	4.44e-05	2.16e-05	Higher in CRC
Lactobacillus amylovorus	6.54e-05	2.04e-05	4.5e-05	Higher in CRC
Selenomonas ruminantium	0.000141	0.000177	-3.64e-05	Lower in CRC
Bacteroides sp. ZJ-18	0.000551	0.000588	-3.61e-05	Lower in CRC
Gordonibacter urolithinfaciens	3.64e-05	7.25e-05	-3.6e-05	Lower in CRC
Atopobium sp. oral taxon 416	6.54e-05	4.8e-05	1.73e-05	Higher in CRC
Lactobacillus gasseri	6.5e-05	4.13e-05	2.37e-05	Higher in CRC
Streptococcus sp. CP1998	6.43e-05	1.65e-05	4.78e-05	Higher in CRC
Pluralibacter gergoviae	6.36e-05	6.98e-06	5.66e-05	Higher in CRC
Streptococcus dentalis	6.29e-05	1.54e-05	4.75e-05	Higher in CRC
Streptomyces anulatus	6.25e-05	3.75e-05	2.5e-05	Higher in CRC
Finegoldia magna	6.21e-05	2.61e-05	3.6e-05	Higher in CRC
Enterobacter sichuanensis	3.96e-05	7.43e-05	-3.47e-05	Lower in CRC
Streptomyces sp. BI87	6.14e-05	0	6.14e-05	Higher in CRC
Bradyrhizobium diazoefficiens	6.11e-05	8.96e-06	5.21e-05	Higher in CRC
Thermocaproicibacter melissae	6.11e-05	2.43e-05	3.67e-05	Higher in CRC
Lachnoanaerobaculum gingivalis	6.11e-05	3.34e-05	2.77e-05	Higher in CRC
Blautia liquoris	6.04e-05	3.63e-05	2.4e-05	Higher in CRC
Lancefieldella parvula	6e-05	1.45e-05	4.55e-05	Higher in CRC
Leclercia adecarboxylata	5.89e-05	2.57e-05	3.33e-05	Higher in CRC
Rothia dentocariosa	5.86e-05	7.45e-06	5.11e-05	Higher in CRC
Anaerotignum propionicum	5.79e-05	1.2e-05	4.59e-05	Higher in CRC
Anaerostipes rhamnosivorans	5.61e-05	2.57e-05	3.04e-05	Higher in CRC
Citrobacter amalonaticus	5.57e-05	1.2e-05	4.37e-05	Higher in CRC
Enterobacter sp. JBIWA005	5.57e-05	3.37e-05	2.2e-05	Higher in CRC
Longicatena caecimuris	5.54e-05	3.37e-05	2.17e-05	Higher in CRC
Lacrimispora xylanolytica	5.54e-05	3.75e-05	1.79e-05	Higher in CRC
Emergencia timonensis	5.5e-05	1.95e-05	3.55e-05	Higher in CRC
Anaerocolumna sp. AGMB13020	5.46e-05	3.03e-05	2.44e-05	Higher in CRC
uncultured Cohaesibacter sp.	5.43e-05	2.67e-05	2.76e-05	Higher in CRC
Anaerostipes caccae	5.43e-05	3.44e-05	1.99e-05	Higher in CRC
uncultured Mailhella sp.	5.43e-05	4.07e-05	1.36e-05	Higher in CRC
Bartonella krasnovii	7.86e-06	3.86e-05	-3.07e-05	Lower in CRC
Anaerotignum sp. MB30-C6	5.39e-05	1.2e-05	4.19e-05	Higher in CRC
Streptococcus australis	5.39e-05	1.23e-05	4.17e-05	Higher in CRC
Prevotella veroralis	0.000259	0.000289	-3.04e-05	Lower in CRC
Porphyromonas pogonae	5.39e-05	1.69e-05	3.7e-05	Higher in CRC
Butyrivibrio hungatei	5.39e-05	3.84e-05	1.55e-05	Higher in CRC
Caproicibacterium sp. BJN0003	5.25e-05	2.25e-05	3e-05	Higher in CRC
Ligilactobacillus agilis	5.21e-05	1.05e-05	4.17e-05	Higher in CRC
Fusobacterium polymorphum	5.21e-05	1.9e-05	3.32e-05	Higher in CRC
Dysgonomonas capnocytophagoides	5.21e-05	2.48e-05	2.73e-05	Higher in CRC
Proteiniphilum saccharofermentans	5.18e-05	2.3e-05	2.88e-05	Higher in CRC
Megamonas hypermegale	5.11e-05	4.52e-05	5.88e-06	Higher in CRC
Thermophilibacter immobilis	5.11e-05	4.84e-05	2.68e-06	Higher in CRC
Eubacterium maltosivorans	5.04e-05	3.52e-05	1.52e-05	Higher in CRC
Enterobacter sp. JBIWA003	5e-05	4.72e-06	4.53e-05	Higher in CRC
Fusobacterium varium	5e-05	2.55e-05	2.45e-05	Higher in CRC
Variovorax paradoxus	5e-05	3.35e-05	1.65e-05	Higher in CRC
Collinsella stercoris	5e-05	4.46e-05	5.38e-06	Higher in CRC
Selenomonas sp. TAMA-11512	4.96e-05	4.93e-05	3.03e-07	Higher in CRC
uncultured Caproiciproducens sp.	4.93e-05	1.95e-05	2.98e-05	Higher in CRC
Priestia megaterium	4.93e-05	2.75e-05	2.18e-05	Higher in CRC
Lactococcus lactis	4.89e-05	2.05e-05	2.85e-05	Higher in CRC
Pontibacter russatus	4.86e-05	1.29e-05	3.56e-05	Higher in CRC
Mangrovibacterium marinum	4.86e-05	1.57e-05	3.29e-05	Higher in CRC
Eubacterium sp. F2	4.86e-05	2.89e-05	1.97e-05	Higher in CRC
Lactobacillus delbrueckii	3.43e-05	6.18e-05	-2.75e-05	Lower in CRC
Enterobacter cloacae complex sp. R_G8	1.21e-05	3.96e-05	-2.75e-05	Lower in CRC
Limosilactobacillus panis	4.82e-05	1.89e-07	4.8e-05	Higher in CRC
Citrobacter sp. FDAARGOS_156	4.79e-05	0	4.79e-05	Higher in CRC
Hymenobacter sublimis	4.79e-05	2.92e-06	4.49e-05	Higher in CRC
Enorma phocaeensis	4.79e-05	2.52e-05	2.27e-05	Higher in CRC
Stutzerimonas stutzeri	4.79e-05	2.74e-05	2.05e-05	Higher in CRC
Paenibacillus sp. FSL R5-0713	4.75e-05	3.87e-06	4.36e-05	Higher in CRC
Limosilactobacillus reuteri	4.75e-05	1.58e-05	3.17e-05	Higher in CRC
Slackia heliotrinireducens	4.75e-05	2.6e-05	2.15e-05	Higher in CRC
Clostridium beijerinckii	4.75e-05	3.67e-05	1.08e-05	Higher in CRC
Lacrimispora sp. BS-2	4.68e-05	2.93e-05	1.74e-05	Higher in CRC
Escherichia marmotae	4.64e-05	2.25e-05	2.39e-05	Higher in CRC
Aeromonas veronii	4.61e-05	2.85e-05	1.76e-05	Higher in CRC
Streptococcus constellatus	4.57e-05	8.49e-07	4.49e-05	Higher in CRC
Citrobacter sp. RHBSTW-00446	4.57e-05	5.85e-06	3.99e-05	Higher in CRC
Gemella haemolysans	4.57e-05	1.4e-05	3.18e-05	Higher in CRC
Lacrimispora sphenoides	4.57e-05	2.45e-05	2.12e-05	Higher in CRC
Anaerocolumna sedimenticola	4.57e-05	2.58e-05	2e-05	Higher in CRC
Clostridium sporogenes	4.57e-05	3.32e-05	1.25e-05	Higher in CRC
Olsenella uli	4.57e-05	3.6e-05	9.68e-06	Higher in CRC
Leptotrichia trevisanii	4.5e-05	4.25e-06	4.08e-05	Higher in CRC
Bacillus velezensis	4.5e-05	3.08e-05	1.42e-05	Higher in CRC
Bacillus amyloliquefaciens	1.14e-05	3.6e-05	-2.46e-05	Lower in CRC
Anaerocolumna chitinilytica	4.46e-05	2.59e-05	1.87e-05	Higher in CRC
Streptomyces sp. NBC_01460	4.43e-05	2.45e-06	4.18e-05	Higher in CRC
Sorangium cellulosum	4.43e-05	2.45e-05	1.98e-05	Higher in CRC
Salmonella bongori	4.39e-05	1.18e-05	3.21e-05	Higher in CRC
Dysgonomonas sp. HDW5B	4.36e-05	9.91e-06	3.37e-05	Higher in CRC
Anaerocolumna sp. MB42-C2	4.36e-05	2.39e-05	1.97e-05	Higher in CRC
Streptomyces venezuelae	4.36e-05	3.09e-05	1.26e-05	Higher in CRC
Proteiniphilum propionicum	4.32e-05	2.19e-05	2.13e-05	Higher in CRC
Selenomonas sp. oral taxon 920	4.32e-05	4.28e-05	3.84e-07	Higher in CRC
Limosilactobacillus allomucosae	4.29e-05	3.4e-06	3.95e-05	Higher in CRC
Klebsiella grimontii	4.25e-05	1.42e-05	2.83e-05	Higher in CRC
Shinella zoogloeoides	4.25e-05	1.92e-05	2.33e-05	Higher in CRC
Aminipila luticellarii	4.21e-05	1.53e-05	2.69e-05	Higher in CRC
Anaerocolumna sp. AGMB13025	4.18e-05	3.08e-05	1.1e-05	Higher in CRC
Streptococcus gallolyticus	3e-05	5.35e-05	-2.35e-05	Lower in CRC
Mageeibacillus indolicus	4.14e-05	1.84e-05	2.3e-05	Higher in CRC
Niastella koreensis	4.11e-05	1.17e-05	2.94e-05	Higher in CRC
Streptococcus gordonii	4.11e-05	1.24e-05	2.87e-05	Higher in CRC
Tepidimonas taiwanensis	5.36e-06	2.87e-05	-2.33e-05	Lower in CRC
Streptococcus sp. FDAARGOS_192	4.11e-05	1.97e-05	2.14e-05	Higher in CRC
Akkermansia sp. N21116	1.54e-05	3.85e-05	-2.31e-05	Lower in CRC
Caldifermentibacillus hisashii	4.11e-05	2.05e-05	2.06e-05	Higher in CRC
Paludicola sp. MB14-C6	4.11e-05	2.23e-05	1.88e-05	Higher in CRC
Phaeobacter inhibens	4.07e-05	1.98e-06	3.87e-05	Higher in CRC
Peribacillus simplex	4.04e-05	1.01e-05	3.03e-05	Higher in CRC
Paludibacter propionicigenes	4.04e-05	1.69e-05	2.35e-05	Higher in CRC
Kluyvera sp. CRP	4e-05	1.21e-05	2.79e-05	Higher in CRC
Flavobacterium johnsoniae	3.96e-05	1.12e-05	2.84e-05	Higher in CRC
Treponema denticola	3.96e-05	2.05e-05	1.92e-05	Higher in CRC
Streptococcus sp. Marseille-Q3533	3.93e-05	4.53e-06	3.48e-05	Higher in CRC
Pantoea agglomerans	3.89e-05	1.65e-05	2.24e-05	Higher in CRC
Proteiniclasticum sp. QWL-01	3.86e-05	1.61e-05	2.24e-05	Higher in CRC
Selenomonas sp. oral taxon 136	3.86e-05	2.42e-05	1.43e-05	Higher in CRC
Lachnoclostridium phytofermentans	3.86e-05	2.78e-05	1.07e-05	Higher in CRC
Clostridium estertheticum	3.86e-05	3.14e-05	7.16e-06	Higher in CRC
Enterobacter sp. N18-03635	3.82e-05	5.38e-06	3.28e-05	Higher in CRC
Tellurirhabdus rosea	3.82e-05	7.74e-06	3.05e-05	Higher in CRC
Pseudocitrobacter faecalis	3.82e-05	8.96e-06	2.93e-05	Higher in CRC
Hymenobacter radiodurans	3.82e-05	9.62e-06	2.86e-05	Higher in CRC
Achromobacter xylosoxidans	3.79e-05	1.75e-05	2.04e-05	Higher in CRC
Yersinia enterocolitica	3.71e-05	5.38e-06	3.18e-05	Higher in CRC
Kluyvera genomosp. 3	3.71e-05	1.11e-05	2.6e-05	Higher in CRC
Brevibacillus brevis	3.71e-05	1.98e-05	1.73e-05	Higher in CRC
Lactobacillus paragasseri	3.68e-05	1.05e-05	2.63e-05	Higher in CRC
Prochlorococcus marinus	3.68e-05	1.98e-05	1.7e-05	Higher in CRC
Streptococcus sanguinis	3.68e-05	2.14e-05	1.54e-05	Higher in CRC
Anaerocolumna cellulosilytica	3.68e-05	2.39e-05	1.29e-05	Higher in CRC
Sphingobium yanoikuyae	3.64e-05	9.91e-06	2.65e-05	Higher in CRC
Veillonella rodentium	3.64e-05	2.51e-05	1.13e-05	Higher in CRC
Marinifilum fragile	3.61e-05	1.9e-05	1.71e-05	Higher in CRC
Anaerostipes sp. PC18	3.57e-05	2.54e-05	1.03e-05	Higher in CRC
Aeromonas hydrophila	3.54e-05	1.69e-05	1.85e-05	Higher in CRC
Berryella intestinalis	3.54e-05	1.81e-05	1.72e-05	Higher in CRC
Selenomonas dianae	3.54e-05	3.16e-05	3.75e-06	Higher in CRC
Bacillus subtilis	3.54e-05	3.51e-05	2.63e-07	Higher in CRC
Streptococcus sp. oral taxon 064	3.5e-05	9.43e-08	3.49e-05	Higher in CRC
Pontibacter kalidii	3.5e-05	1.02e-05	2.48e-05	Higher in CRC
Chitinophaga sp. HK235	3.5e-05	1.23e-05	2.27e-05	Higher in CRC
Streptococcus pyogenes	3.5e-05	1.26e-05	2.24e-05	Higher in CRC
Streptococcus sp. HSISS3	3.5e-05	2.86e-05	6.42e-06	Higher in CRC
Lysobacter enzymogenes	3.46e-05	1.11e-05	2.35e-05	Higher in CRC
Chryseobacterium indologenes	3.46e-05	1.86e-05	1.61e-05	Higher in CRC
Arabiibacter massiliensis	3.46e-05	2.48e-05	9.83e-06	Higher in CRC
Citrobacter werkmanii	3.46e-05	7.26e-06	2.74e-05	Higher in CRC
Dysgonomonas sp. HDW5A	3.43e-05	1.08e-05	2.34e-05	Higher in CRC
Cupriavidus taiwanensis	3.43e-05	2.08e-05	1.35e-05	Higher in CRC
Tistrella mobilis	3.43e-05	2.39e-05	1.04e-05	Higher in CRC
Streptomyces canus	3.43e-05	2.74e-05	6.93e-06	Higher in CRC
Enterococcus cecorum	3.36e-05	2e-05	1.36e-05	Higher in CRC
Haemophilus parainfluenzae	0.00127393	0.00129359	-1.97e-05	Lower in CRC
Amedibacterium intestinale	3.36e-05	2.55e-05	8.1e-06	Higher in CRC
Anaeromicropila herbilytica	3.36e-05	2.96e-05	3.95e-06	Higher in CRC
Porphyromonas crevioricanis	3.32e-05	1.1e-05	2.22e-05	Higher in CRC
Elizabethkingia anophelis	3.32e-05	1.21e-05	2.11e-05	Higher in CRC
Peribacillus frigoritolerans	3.32e-05	2.1e-05	1.22e-05	Higher in CRC
Proteus terrae	3.29e-05	2.55e-06	3.03e-05	Higher in CRC
Clostridium sp. MD294	3.29e-05	1.92e-05	1.37e-05	Higher in CRC
Neisseria gonorrhoeae	1.29e-05	3.21e-05	-1.92e-05	Lower in CRC
Raoultibacter timonensis	3.29e-05	2.39e-05	8.99e-06	Higher in CRC
Enterobacter chuandaensis	3.25e-05	1.42e-05	1.83e-05	Higher in CRC
Nibribacter ruber	3.21e-05	5.09e-06	2.7e-05	Higher in CRC
Filifactor alocis	3.21e-05	7.36e-06	2.48e-05	Higher in CRC
Fulvitalea axinellae	3.21e-05	8.02e-06	2.41e-05	Higher in CRC
Xiashengella succiniciproducens	3.21e-05	1.14e-05	2.07e-05	Higher in CRC
Listeria monocytogenes	2.64e-05	4.53e-05	-1.89e-05	Lower in CRC
Archangium violaceum	3.21e-05	1.77e-05	1.44e-05	Higher in CRC
Petroclostridium sp. X23	3.21e-05	1.79e-05	1.42e-05	Higher in CRC
Streptococcus sp. NPS 308	3.21e-05	4.72e-07	3.17e-05	Higher in CRC
Rhodococcus opacus	3.21e-05	1.07e-05	2.15e-05	Higher in CRC
Clostridium sp. BNL1100	3.18e-05	5.94e-06	2.58e-05	Higher in CRC
Chitinophaga sp. XS-30	3.18e-05	7.55e-06	2.42e-05	Higher in CRC
Chryseolinea soli	3.18e-05	7.64e-06	2.41e-05	Higher in CRC
Chakrabartyella piscis	3.18e-05	1.17e-05	2.01e-05	Higher in CRC
Fretibacterium fastidiosum	3.18e-05	1.22e-05	1.96e-05	Higher in CRC
Draconibacterium orientale	3.18e-05	1.55e-05	1.63e-05	Higher in CRC
Actinomyces pacaensis	3.18e-05	2.65e-05	5.28e-06	Higher in CRC
Streptococcus dysgalactiae	3.14e-05	6.23e-06	2.52e-05	Higher in CRC
Acetivibrio thermocellus	3.14e-05	1.16e-05	1.98e-05	Higher in CRC
Providencia rettgeri	3.14e-05	1.69e-05	1.45e-05	Higher in CRC
Leclercia pneumoniae	3.11e-05	3.02e-06	2.81e-05	Higher in CRC
Peptostreptococcus equinus	3.11e-05	6.13e-06	2.49e-05	Higher in CRC
Bacillus paralicheniformis	6.43e-06	2.42e-05	-1.77e-05	Lower in CRC
Roseiflexus castenholzii	3.11e-05	1.05e-05	2.06e-05	Higher in CRC
Streptococcus ilei	3.11e-05	1.32e-05	1.79e-05	Higher in CRC
Cloacibacillus porcorum	3.07e-05	1.08e-05	1.99e-05	Higher in CRC
Eggerthella sp. YY7918	3.04e-05	1.59e-05	1.44e-05	Higher in CRC
Pseudomonas fluorescens	3.04e-05	1.62e-05	1.41e-05	Higher in CRC
Streptococcus parasuis	3.04e-05	1.89e-05	1.15e-05	Higher in CRC
Citrobacter farmeri	3e-05	4.81e-06	2.52e-05	Higher in CRC
Mycoplasma mycoides	3e-05	9.81e-06	2.02e-05	Higher in CRC
Dehalobacter sp. DCM	3e-05	1.08e-05	1.92e-05	Higher in CRC
Maridesulfovibrio sp.	3e-05	1.31e-05	1.69e-05	Higher in CRC
Citrobacter sp. Colony219	2.96e-05	0	2.96e-05	Higher in CRC
Neisseria subflava	2.96e-05	1.47e-05	1.49e-05	Higher in CRC
Labilibaculum sp.	2.93e-05	8.49e-06	2.08e-05	Higher in CRC
Clostridium pasteurianum	2.93e-05	2.21e-05	7.21e-06	Higher in CRC
Enterobacter sp. ECC-249	2.89e-05	3.58e-06	2.53e-05	Higher in CRC
Pannonibacter phragmitetus	2.89e-05	1.26e-05	1.63e-05	Higher in CRC
Enterobacter sp. JBIWA008	2.86e-05	1.32e-06	2.73e-05	Higher in CRC
Pyramidobacter sp. YE332	2.86e-05	1.31e-05	1.55e-05	Higher in CRC
Herbinix luporum	2.86e-05	1.8e-05	1.06e-05	Higher in CRC
Streptococcus sp. oral taxon 061	2.82e-05	6.13e-06	2.21e-05	Higher in CRC
Paracidovorax avenae	2.82e-05	9.34e-06	1.89e-05	Higher in CRC
Anaeropeptidivorans aminofermentans	2.82e-05	1.18e-05	1.64e-05	Higher in CRC
Clostridium thermosuccinogenes	2.82e-05	1.34e-05	1.48e-05	Higher in CRC
Xiamenia xianingshaonis	2.82e-05	1.78e-05	1.04e-05	Higher in CRC
Streptococcus sp. 1643	2.79e-05	6.6e-07	2.72e-05	Higher in CRC
Limosilactobacillus pontis	2.79e-05	1.23e-06	2.66e-05	Higher in CRC
Mucilaginibacter rubeus	2.79e-05	8.3e-06	1.96e-05	Higher in CRC
Mogibacterium diversum	2.79e-05	1.02e-05	1.77e-05	Higher in CRC
Streptococcus vestibularis	2.79e-05	1.07e-05	1.72e-05	Higher in CRC
Helcococcus ovis	2.79e-05	1.56e-05	1.23e-05	Higher in CRC
Enterobacter sp. 18A13	2.75e-05	2.92e-06	2.46e-05	Higher in CRC
Vibrio fluvialis	2.75e-05	3.49e-06	2.4e-05	Higher in CRC
Sphingobacterium spiritivorum	2.75e-05	9.62e-06	1.79e-05	Higher in CRC
Dyadobacter fermentans	2.75e-05	1.06e-05	1.69e-05	Higher in CRC
Lachnoanaerobaculum umeaense	2.71e-05	2.42e-05	2.99e-06	Higher in CRC
Paenibacillus konkukensis	2.71e-05	4.06e-06	2.31e-05	Higher in CRC
Salinivirga cyanobacteriivorans	2.71e-05	7.74e-06	1.94e-05	Higher in CRC
Cloacibacillus evryensis	2.71e-05	1.08e-05	1.63e-05	Higher in CRC
Citrobacter cronae	2.68e-05	3.3e-06	2.35e-05	Higher in CRC
Rhodothermus marinus	2.68e-05	8.3e-06	1.85e-05	Higher in CRC
Bacillus mycoides	2.68e-05	1.69e-05	9.9e-06	Higher in CRC
Pseudoxanthomonas mexicana	2.64e-05	7.64e-06	1.88e-05	Higher in CRC
Pontibacter akesuensis	2.64e-05	7.92e-06	1.85e-05	Higher in CRC
Sinorhizobium fredii	2.64e-05	1.18e-05	1.46e-05	Higher in CRC
Streptococcus sp. FSL K6-1323	2.64e-05	1.37e-05	1.27e-05	Higher in CRC
Kitasatospora purpeofusca	2.64e-05	1.58e-05	1.06e-05	Higher in CRC
Massilimicrobiota timonensis	2.64e-05	1.75e-05	8.98e-06	Higher in CRC
Streptomyces murinus	2.61e-05	0	2.61e-05	Higher in CRC
Escherichia sp. KS167_9B	2.61e-05	4.62e-06	2.14e-05	Higher in CRC
Euzebyella marina	2.61e-05	4.81e-06	2.13e-05	Higher in CRC
Paenibacillus thiaminolyticus	2.61e-05	7.17e-06	1.89e-05	Higher in CRC
Ndongobacter massiliensis	2.61e-05	7.17e-06	1.89e-05	Higher in CRC
Nitratidesulfovibrio vulgaris	2.61e-05	1.52e-05	1.09e-05	Higher in CRC
Faecalibaculum rodentium	2.61e-05	1.52e-05	1.09e-05	Higher in CRC
Streptococcus sp. HSISS2	2.61e-05	2.11e-05	4.94e-06	Higher in CRC
Streptomyces sp. NBC_00310	2.57e-05	0	2.57e-05	Higher in CRC
Eikenella corrodens	2.57e-05	1.32e-06	2.44e-05	Higher in CRC
Anseongella ginsenosidimutans	2.57e-05	5.47e-06	2.02e-05	Higher in CRC
Pontibacter actiniarum	2.57e-05	8.21e-06	1.75e-05	Higher in CRC
Amygdalobacter indicium	2.57e-05	1.08e-05	1.5e-05	Higher in CRC
Streptococcus sp. A12	2.57e-05	1.19e-05	1.38e-05	Higher in CRC
Enterobacter cloacae complex sp.	2.57e-05	2.54e-05	3.37e-07	Higher in CRC
Pantoea dispersa	1.11e-05	2.6e-05	-1.5e-05	Lower in CRC
Winogradskyella sediminis	2.54e-05	8.49e-07	2.45e-05	Higher in CRC
Enterobacter pseudoroggenkampii	2.54e-05	5.19e-06	2.02e-05	Higher in CRC
Hymenobacter cellulosilyticus	2.54e-05	5.75e-06	1.96e-05	Higher in CRC
Sphingobacterium multivorum	2.54e-05	7.64e-06	1.77e-05	Higher in CRC
Treponema saccharophilum	2.54e-05	8.68e-06	1.67e-05	Higher in CRC
Capnocytophaga ochracea	2.54e-05	9.06e-06	1.63e-05	Higher in CRC
Pseudomonas chlororaphis	2.54e-05	1.09e-05	1.44e-05	Higher in CRC
Escherichia sp. E4742	2.54e-05	1.45e-05	1.08e-05	Higher in CRC
Clostridium ljungdahlii	2.5e-05	6.6e-07	2.43e-05	Higher in CRC
Enterobacter sp. S-33	2.5e-05	7.17e-06	1.78e-05	Higher in CRC
Lactiplantibacillus plantarum	2.5e-05	1.77e-05	7.26e-06	Higher in CRC
Clostridium intestinale	2.5e-05	2.06e-05	4.43e-06	Higher in CRC
Streptococcus infantis	2.46e-05	5.09e-06	1.95e-05	Higher in CRC
Chryseobacterium taklimakanense	2.46e-05	7.74e-06	1.69e-05	Higher in CRC
Heyndrickxia coagulans	2.46e-05	8.87e-06	1.58e-05	Higher in CRC
Ensifer adhaerens	2.46e-05	1e-05	1.46e-05	Higher in CRC
Bdellovibrio bacteriovorus	2.46e-05	1.08e-05	1.38e-05	Higher in CRC
Corynebacterium pyruviciproducens	2.46e-05	1.87e-05	5.96e-06	Higher in CRC
Enterobacter vonholyi	2.43e-05	3.02e-06	2.13e-05	Higher in CRC
Xanthomonas citri	2.43e-05	3.77e-06	2.05e-05	Higher in CRC
Propionibacterium freudenreichii	2.43e-05	7.08e-06	1.72e-05	Higher in CRC
Chitinophaga pollutisoli	2.43e-05	8.96e-06	1.53e-05	Higher in CRC
Aquipluma nitroreducens	2.43e-05	1.23e-05	1.2e-05	Higher in CRC
Olsenella sp. oral taxon 807	2.43e-05	2.31e-05	1.17e-06	Higher in CRC
Streptococcus mutans	2.39e-05	5.57e-06	1.84e-05	Higher in CRC
Pseudomonas syringae	2.39e-05	9.43e-06	1.45e-05	Higher in CRC
Rhodopseudomonas palustris	2.39e-05	1.96e-05	4.31e-06	Higher in CRC
Enterobacter chengduensis	2.36e-05	3.21e-06	2.04e-05	Higher in CRC
Alkalibacter rhizosphaerae	2.36e-05	5.19e-06	1.84e-05	Higher in CRC
Hymenobacter monticola	2.36e-05	7.64e-06	1.59e-05	Higher in CRC
Treponema peruense	2.36e-05	1.19e-05	1.17e-05	Higher in CRC
Aliarcobacter cryaerophilus	2.36e-05	1.29e-05	1.06e-05	Higher in CRC
Streptomyces sp. RLB3-6	2.32e-05	6.13e-06	1.71e-05	Higher in CRC
Persicobacter psychrovividus	2.32e-05	6.89e-06	1.63e-05	Higher in CRC
Mesobacillus jeotgali	2.32e-05	9.15e-06	1.41e-05	Higher in CRC
Schaalia turicensis	2.32e-05	9.34e-06	1.39e-05	Higher in CRC
Murdochiella vaginalis	2.32e-05	9.62e-06	1.36e-05	Higher in CRC
Chitinophaga oryzae	2.32e-05	9.81e-06	1.34e-05	Higher in CRC
Agrobacterium vitis	2.32e-05	1.06e-05	1.26e-05	Higher in CRC
Leptogranulimonas caecicola	2.32e-05	1.2e-05	1.12e-05	Higher in CRC
Denitrobacterium detoxificans	2.32e-05	1.56e-05	7.65e-06	Higher in CRC
Clostridium tetani	2.32e-05	1.57e-05	7.55e-06	Higher in CRC
Enterobacter cancerogenus	2.29e-05	5.57e-06	1.73e-05	Higher in CRC
Streptomyces mirabilis	2.29e-05	6.04e-06	1.68e-05	Higher in CRC
Delftia tsuruhatensis	2.29e-05	6.7e-06	1.62e-05	Higher in CRC
Chryseobacterium camelliae	2.29e-05	7.17e-06	1.57e-05	Higher in CRC
Cupriavidus pauculus	2.29e-05	1.34e-05	9.46e-06	Higher in CRC
Bartonella bacilliformis	2.25e-05	5.66e-07	2.19e-05	Higher in CRC
Enterobacter cloacae complex sp. ECL352	2.25e-05	1.6e-06	2.09e-05	Higher in CRC
Halomonas sp. FeN2	2.25e-05	2.08e-06	2.04e-05	Higher in CRC
Echinicola marina	2.25e-05	7.26e-06	1.52e-05	Higher in CRC
Chitinophaga caseinilytica	2.25e-05	7.74e-06	1.48e-05	Higher in CRC
Thermoclostridium stercorarium	2.25e-05	7.83e-06	1.47e-05	Higher in CRC
Caloramator sp. mosi_1	2.25e-05	8.3e-06	1.42e-05	Higher in CRC
Abiotrophia defectiva	2.25e-05	1.08e-05	1.17e-05	Higher in CRC
Paenibacillus mucilaginosus	2.25e-05	1.42e-05	8.35e-06	Higher in CRC
Termitidicoccus mucosus	2.21e-05	6.13e-06	1.6e-05	Higher in CRC
Fusobacterium pseudoperiodonticum	2.21e-05	1.02e-05	1.2e-05	Higher in CRC
Clostridium saccharoperbutylacetonicum	2.21e-05	2.01e-05	2.05e-06	Higher in CRC
Streptomyces coelicoflavus	2.21e-05	1.04e-06	2.11e-05	Higher in CRC
Exiguobacterium aurantiacum	2.21e-05	3.77e-06	1.84e-05	Higher in CRC
Nocardia brasiliensis	2.21e-05	1.18e-05	1.04e-05	Higher in CRC
Citrobacter koseri	2.21e-05	1.51e-05	7.05e-06	Higher in CRC
Terrisporobacter petrolearius	2.21e-05	1.92e-05	2.99e-06	Higher in CRC
Streptomyces sp. cg2	2.18e-05	2.26e-06	1.95e-05	Higher in CRC
Hymenobacter jejuensis	2.18e-05	6.32e-06	1.55e-05	Higher in CRC
Aminipila butyrica	2.18e-05	6.32e-06	1.55e-05	Higher in CRC
Tepidibacter hydrothermalis	2.18e-05	7.55e-06	1.42e-05	Higher in CRC
Lysinibacillus fusiformis	2.18e-05	8.21e-06	1.36e-05	Higher in CRC
Campylobacter concisus	2.18e-05	9.91e-06	1.19e-05	Higher in CRC
Thomasclavelia spiroformis	2.18e-05	1.25e-05	9.33e-06	Higher in CRC
Ezakiella coagulans	2.18e-05	1.36e-05	8.2e-06	Higher in CRC
Streptococcus sp. SN-1	2.14e-05	2.26e-06	1.92e-05	Higher in CRC
Bradyrhizobium arachidis	2.14e-05	4.62e-06	1.68e-05	Higher in CRC
Erysipelatoclostridium sp. An173	2.14e-05	1.42e-05	7.28e-06	Higher in CRC
Oxalobacter formigenes	2.14e-05	1.57e-05	5.77e-06	Higher in CRC
Paenibacillus sp. FSL P2-0136	2.11e-05	0	2.11e-05	Higher in CRC
Limihaloglobus sulfuriphilus	2.11e-05	7.55e-07	2.03e-05	Higher in CRC
Alkalitalea saponilacus	2.11e-05	7.26e-06	1.38e-05	Higher in CRC
Kluyvera sichuanensis	2.11e-05	7.74e-06	1.33e-05	Higher in CRC
Streptococcus cristatus	2.11e-05	8.02e-06	1.31e-05	Higher in CRC
Hymenobacter volaticus	2.11e-05	9.15e-06	1.19e-05	Higher in CRC
Cedecea neteri	2.11e-05	9.72e-06	1.14e-05	Higher in CRC
Desulfitobacterium hafniense	2.11e-05	1.04e-05	1.07e-05	Higher in CRC
Halosquirtibacter xylanolyticus	2.07e-05	4.81e-06	1.59e-05	Higher in CRC
Candidatus Sulfidibacterium hydrothermale	2.07e-05	6.42e-06	1.43e-05	Higher in CRC
Kovacikia minuta	2.07e-05	7.08e-06	1.36e-05	Higher in CRC
Runella slithyformis	2.07e-05	7.64e-06	1.31e-05	Higher in CRC
Fibrobacter succinogenes	2.07e-05	8.87e-06	1.18e-05	Higher in CRC
Sphingobacterium thalpophilum	2.07e-05	1.31e-05	7.6e-06	Higher in CRC
Turicibacter sp. H121	1.07e-06	1.39e-05	-1.28e-05	Lower in CRC
Campylobacter ureolyticus	2.04e-05	2.64e-06	1.77e-05	Higher in CRC
Sphingobacterium lactis	2.04e-05	7.17e-06	1.32e-05	Higher in CRC
Thermoanaerobacterium thermosaccharolyticum	2.04e-05	7.55e-06	1.28e-05	Higher in CRC
Acetivibrio clariflavus	2.04e-05	8.21e-06	1.21e-05	Higher in CRC
Xanthomonas campestris	2.04e-05	1.21e-05	8.28e-06	Higher in CRC
Burkholderia cepacia	2.04e-05	1.42e-05	6.11e-06	Higher in CRC
Streptomyces sp. NBC_00989	2e-05	2.08e-06	1.79e-05	Higher in CRC
Dyadobacter sp. 676	2e-05	5.19e-06	1.48e-05	Higher in CRC
Capnocytophaga canimorsus	2e-05	5.57e-06	1.44e-05	Higher in CRC
Peptoclostridium acidaminophilum	2e-05	5.57e-06	1.44e-05	Higher in CRC
Gardnerella vaginalis	2e-05	5.75e-06	1.42e-05	Higher in CRC
Aeromonas dhakensis	2e-05	5.94e-06	1.41e-05	Higher in CRC
Enterobacter sp. PGRG2	1.43e-06	1.39e-05	-1.24e-05	Lower in CRC
Coriobacterium glomerans	2e-05	8.21e-06	1.18e-05	Higher in CRC
Filimonas lacunae	2e-05	8.58e-06	1.14e-05	Higher in CRC
Hymenobacter sp. APR13	2e-05	8.87e-06	1.11e-05	Higher in CRC
Cytobacillus firmus	2e-05	8.87e-06	1.11e-05	Higher in CRC
Saccharibacillus brassicae	2e-05	9.72e-06	1.03e-05	Higher in CRC
Amygdalobacter nucleatus	2e-05	1.1e-05	8.96e-06	Higher in CRC
Ralstonia solanacearum	2e-05	1.11e-05	8.87e-06	Higher in CRC
Peptacetobacter hiranonis	2e-05	1.48e-05	5.19e-06	Higher in CRC
Clostridium sp. MB05	2e-05	1.98e-05	1.89e-07	Higher in CRC
Pseudodesulfovibrio thermohalotolerans	1.96e-05	3.4e-06	1.62e-05	Higher in CRC
Acetobacter aceti	1.96e-05	6.04e-06	1.36e-05	Higher in CRC
Rhodocaloribacter litoris	1.96e-05	6.98e-06	1.27e-05	Higher in CRC
Clostridium chauvoei	1.96e-05	1.9e-05	6.81e-07	Higher in CRC
Capnocytophaga sputigena	1.96e-05	7.45e-06	1.22e-05	Higher in CRC
Paenibacillus sp. RUD330	1.96e-05	7.64e-06	1.2e-05	Higher in CRC
Pseudodesulfovibrio tunisiensis	1.93e-05	4.43e-06	1.49e-05	Higher in CRC
Paenibacillus sp. FSL R5-0912	1.93e-05	5.19e-06	1.41e-05	Higher in CRC
Tumebacillus avium	1.93e-05	5.28e-06	1.4e-05	Higher in CRC
Clostridium thermarum	1.93e-05	7.36e-06	1.19e-05	Higher in CRC
Allobaculum sp. Allo2	1.93e-05	8.58e-06	1.07e-05	Higher in CRC
Treponema vincentii	1.93e-05	8.68e-06	1.06e-05	Higher in CRC
Heliomicrobium modesticaldum	1.93e-05	9.62e-06	9.66e-06	Higher in CRC
Maribellus comscasis	1.93e-05	1.05e-05	8.81e-06	Higher in CRC
Enterobacter quasiroggenkampii	1.93e-05	1.06e-05	8.72e-06	Higher in CRC
Ruminiclostridium herbifermentans	1.93e-05	1.16e-05	7.68e-06	Higher in CRC
Paenibacillus chitinolyticus	1.93e-05	1.34e-05	5.89e-06	Higher in CRC
Candidatus Uabimicrobium helgolandensis	1.89e-05	1.51e-06	1.74e-05	Higher in CRC
Caproiciproducens sp. NJN-50	1.89e-05	4.15e-06	1.48e-05	Higher in CRC
Robiginitalea biformata	1.89e-05	4.34e-06	1.46e-05	Higher in CRC
Cohnella sp. LGH	1.89e-05	6.6e-06	1.23e-05	Higher in CRC
Paenibacillus dendritiformis	1.89e-05	8.4e-06	1.05e-05	Higher in CRC
Sutcliffiella horikoshii	1.89e-05	1.17e-05	7.23e-06	Higher in CRC
Clostridium bornimense	1.89e-05	1.72e-05	1.76e-06	Higher in CRC
Arcobacter cloacae	1.86e-05	7.55e-07	1.78e-05	Higher in CRC
Streptococcus sp. DTU_2020_1001019_1_SI_AUS_MUR_006	1.86e-05	2.36e-06	1.62e-05	Higher in CRC
Chitinophaga sp. LS1	1.86e-05	3.4e-06	1.52e-05	Higher in CRC
Myxococcus xanthus	1.86e-05	4.43e-06	1.41e-05	Higher in CRC
Glaesserella parasuis	6.79e-06	1.85e-05	-1.17e-05	Lower in CRC
Flavobacterium sp. IMCC34518	1.86e-05	5.47e-06	1.31e-05	Higher in CRC
Rubrobacter xylanophilus	1.86e-05	5.66e-06	1.29e-05	Higher in CRC
Streptomyces lydicus	1.86e-05	6.98e-06	1.16e-05	Higher in CRC
Sinanaerobacter sp. ZZT-01	1.86e-05	7.17e-06	1.14e-05	Higher in CRC
Streptomyces goshikiensis	1.86e-05	8.21e-06	1.04e-05	Higher in CRC
Streptococcus ruminicola	8.57e-06	2.02e-05	-1.16e-05	Lower in CRC
Flavobacterium sp. I3-2	1.86e-05	8.49e-06	1.01e-05	Higher in CRC
Chitinophaga sancti	1.86e-05	1.1e-05	7.53e-06	Higher in CRC
Helicobacter pylori	1.86e-05	1.17e-05	6.87e-06	Higher in CRC
Candidatus Minimicrobia vallesae	1.86e-05	1.73e-05	1.31e-06	Higher in CRC
Vaginella massiliensis	1.82e-05	2.17e-06	1.6e-05	Higher in CRC
Larkinella insperata	1.82e-05	2.17e-06	1.6e-05	Higher in CRC
Bacillus safensis	1.82e-05	2.92e-06	1.53e-05	Higher in CRC
Capnocytophaga sp. ARDL2	1.82e-05	5.57e-06	1.26e-05	Higher in CRC
Streptococcus sp. FSL R7-0248	1.82e-05	6.32e-06	1.19e-05	Higher in CRC
Sphingobacterium sp. ML3W	1.82e-05	6.89e-06	1.13e-05	Higher in CRC
Brevundimonas vesicularis	1.82e-05	8.58e-06	9.63e-06	Higher in CRC
Cystobacter fuscus	1.82e-05	8.68e-06	9.54e-06	Higher in CRC
Aminipila terrae	1.82e-05	8.87e-06	9.35e-06	Higher in CRC
Ruminiclostridium papyrosolvens	1.82e-05	1.04e-05	7.84e-06	Higher in CRC
Allocoprobacillus halotolerans	1.82e-05	1.08e-05	7.37e-06	Higher in CRC
Oceanirhabdus sp. W0125-5	1.82e-05	1.19e-05	6.33e-06	Higher in CRC
Pediococcus pentosaceus	1.79e-05	2.55e-06	1.53e-05	Higher in CRC
Micromonospora zamorensis	1.79e-05	4.15e-06	1.37e-05	Higher in CRC
Mogibacterium pumilum	1.79e-05	6.6e-06	1.13e-05	Higher in CRC
Acetobacterium wieringae	1.79e-05	7.55e-06	1.03e-05	Higher in CRC
Thermobacillus composti	1.79e-05	1e-05	7.86e-06	Higher in CRC
Anaerofustis stercorihominis	1.79e-05	1.08e-05	7.01e-06	Higher in CRC
Paenibacillus albicereus	1.79e-05	1.15e-05	6.35e-06	Higher in CRC
Romboutsia sp. CE17	1.79e-05	1.58e-05	2.01e-06	Higher in CRC
Vibrio cholerae	1.79e-05	1.77e-05	1.21e-07	Higher in CRC
Corynebacterium jeikeium	1.75e-05	2.08e-06	1.54e-05	Higher in CRC
Streptococcus equinus	1.11e-05	2.22e-05	-1.11e-05	Lower in CRC
Christiangramia flava	1.75e-05	2.55e-06	1.5e-05	Higher in CRC
Streptococcus sp. oral taxon 431	1.75e-05	2.74e-06	1.48e-05	Higher in CRC
Terriglobus roseus	1.75e-05	3.58e-06	1.39e-05	Higher in CRC
Clostridium butyricum	2.86e-05	3.96e-05	-1.11e-05	Lower in CRC
Labilibaculum antarcticum	1.75e-05	3.87e-06	1.36e-05	Higher in CRC
Desulfarculus baarsii	1.75e-05	4.25e-06	1.33e-05	Higher in CRC
Brucella intermedia	1.75e-05	4.34e-06	1.32e-05	Higher in CRC
Microbacterium hominis	1.75e-05	4.53e-06	1.3e-05	Higher in CRC
Clostridium sp. BJN0013	1.75e-05	7.17e-06	1.03e-05	Higher in CRC
Rossellomorea marisflavi	1.75e-05	7.55e-06	9.95e-06	Higher in CRC
Proteiniborus sp. MB09-C3	1.75e-05	8.21e-06	9.29e-06	Higher in CRC
Clostridium argentinense	1.75e-05	1.18e-05	5.71e-06	Higher in CRC
Paracoccus yeei	1.71e-05	1.89e-07	1.7e-05	Higher in CRC
Neisseria bacilliformis	1.71e-05	9.43e-07	1.62e-05	Higher in CRC
Thermaerobacter sp. PB12/4term	1.71e-05	3.77e-06	1.34e-05	Higher in CRC
Pseudobacter ginsenosidimutans	1.71e-05	4.34e-06	1.28e-05	Higher in CRC
Sphaerochaeta associata	1.71e-05	4.81e-06	1.23e-05	Higher in CRC
Pseudoalteromonas piratica	0	1.08e-05	-1.08e-05	Lower in CRC
uncultured Pleomorphomonas sp.	1.71e-05	5.09e-06	1.2e-05	Higher in CRC
Allomuricauda sp. SCSIO 65647	1.71e-05	5.66e-06	1.15e-05	Higher in CRC
Tenuifilum thalassicum	1.71e-05	5.85e-06	1.13e-05	Higher in CRC
Clostridium felsineum	1.71e-05	1.23e-05	4.88e-06	Higher in CRC
Mesorhizobium sp. C395A	1.68e-05	5.66e-07	1.62e-05	Higher in CRC
Fulvivirga ulvae	1.68e-05	3.21e-06	1.36e-05	Higher in CRC
Sphaerisporangium sp. NBC_01403	1.68e-05	3.21e-06	1.36e-05	Higher in CRC
Myroides odoratus	1.68e-05	3.68e-06	1.31e-05	Higher in CRC
Mucilaginibacter jinjuensis	1.68e-05	5.09e-06	1.17e-05	Higher in CRC
Treponema brennaborense	1.68e-05	5.94e-06	1.08e-05	Higher in CRC
Escherichia sp. SCLE84	1.68e-05	6.6e-06	1.02e-05	Higher in CRC
Draconibacterium halophilum	1.68e-05	6.98e-06	9.8e-06	Higher in CRC
Nocardia asteroides	1.68e-05	7.55e-06	9.24e-06	Higher in CRC
Myxococcus stipitatus	1.68e-05	8.4e-06	8.39e-06	Higher in CRC
Halarcobacter sp.	1.68e-05	9.43e-06	7.35e-06	Higher in CRC
Clostridium culturomicium	1.68e-05	1.13e-05	5.46e-06	Higher in CRC
Riemerella anatipestifer	1.68e-05	1.15e-05	5.28e-06	Higher in CRC
Vallitalea guaymasensis	1.68e-05	1.28e-05	3.96e-06	Higher in CRC
Streptococcus sp. FSL W7-1342	1.68e-05	1.3e-05	3.77e-06	Higher in CRC
Enterobacter sp. HK169	1.64e-05	0	1.64e-05	Higher in CRC
Enterobacter sp. SGAir0187	1.64e-05	1.98e-06	1.44e-05	Higher in CRC
Spirosoma sp. KNUC1025	1.64e-05	4.62e-06	1.18e-05	Higher in CRC
Tepiditoga spiralis	1.64e-05	5.38e-06	1.11e-05	Higher in CRC
Oleidesulfovibrio alaskensis	1.64e-05	5.75e-06	1.07e-05	Higher in CRC
Geotalea uraniireducens	1.64e-05	6.13e-06	1.03e-05	Higher in CRC
Dehalobacterium formicoaceticum	1.64e-05	6.32e-06	1.01e-05	Higher in CRC
Hymenobacter sp. NBH84	1.64e-05	6.51e-06	9.92e-06	Higher in CRC
Crassaminicella profunda	1.64e-05	7.17e-06	9.26e-06	Higher in CRC
Hymenobacter baengnokdamensis	1.64e-05	7.36e-06	9.07e-06	Higher in CRC
Flavobacterium marginilacus	1.64e-05	7.64e-06	8.79e-06	Higher in CRC
Crassaminicella indica	1.64e-05	9.25e-06	7.18e-06	Higher in CRC
Staphylococcus capitis	1.64e-05	9.72e-06	6.71e-06	Higher in CRC
Treponema bryantii	1.64e-05	9.81e-06	6.62e-06	Higher in CRC
Berryella wangjianweii	1.64e-05	1.18e-05	4.64e-06	Higher in CRC
Sedimentibacter sp. MB31-C6	1.64e-05	1.27e-05	3.69e-06	Higher in CRC
Corynebacterium glutamicum	1.61e-05	0	1.61e-05	Higher in CRC
Paenibacillus sp. M-152	1.61e-05	0	1.61e-05	Higher in CRC
Vibrio parahaemolyticus	1.96e-05	3e-05	-1.04e-05	Lower in CRC
Halomonas sp. JS92-SW72	1.61e-05	7.55e-07	1.53e-05	Higher in CRC
Hymenobacter swuensis	1.61e-05	2.17e-06	1.39e-05	Higher in CRC
Rhizosphaericola mali	1.61e-05	3.58e-06	1.25e-05	Higher in CRC
Burkholderia cenocepacia	1.61e-05	3.96e-06	1.21e-05	Higher in CRC
Paenibacillus naphthalenovorans	1.61e-05	4.15e-06	1.19e-05	Higher in CRC
Pseudoxanthomonas suwonensis	1.61e-05	5e-06	1.11e-05	Higher in CRC
Erwinia pyri	3.57e-07	1.07e-05	-1.03e-05	Lower in CRC
Peptoniphilus harei	1.61e-05	5.85e-06	1.02e-05	Higher in CRC
Symbiobacterium thermophilum	1.61e-05	6.23e-06	9.85e-06	Higher in CRC
Treponema ruminis	1.61e-05	6.7e-06	9.37e-06	Higher in CRC
Paenibacillus stellifer	1.61e-05	6.89e-06	9.18e-06	Higher in CRC
Nitratidesulfovibrio liaohensis	1.61e-05	8.96e-06	7.11e-06	Higher in CRC
Mycobacterium avium	1.61e-05	8.96e-06	7.11e-06	Higher in CRC
Intestinibaculum porci	1.61e-05	1.04e-05	5.69e-06	Higher in CRC
Acinetobacter johnsonii	1.61e-05	1.12e-05	4.85e-06	Higher in CRC
Clostridium kluyveri	1.61e-05	1.13e-05	4.75e-06	Higher in CRC
Paenibacillus sp. B01	1.57e-05	1.89e-07	1.55e-05	Higher in CRC
Mesorhizobium sp. M1D.F.Ca.ET.043.01.1.1	1.57e-05	1.6e-06	1.41e-05	Higher in CRC
Campylobacter gracilis	1.57e-05	1.79e-06	1.39e-05	Higher in CRC
Microbacterium aerolatum	1.57e-05	1.89e-06	1.38e-05	Higher in CRC
Leuconostoc lactis	5.71e-06	1.58e-05	-1.01e-05	Lower in CRC
Spirosoma sp. KCTC 42546	1.57e-05	2.64e-06	1.31e-05	Higher in CRC
Capnocytophaga cynodegmi	1.57e-05	2.92e-06	1.28e-05	Higher in CRC
Sphingobacterium hotanense	1.57e-05	3.02e-06	1.27e-05	Higher in CRC
Xanthobacter dioxanivorans	1.57e-05	3.11e-06	1.26e-05	Higher in CRC
Pedobacter sp. HDW13	1.57e-05	6.04e-06	9.68e-06	Higher in CRC
Acetivibrio saccincola	1.57e-05	6.13e-06	9.58e-06	Higher in CRC
Allobaculum mucilyticum	1.57e-05	6.51e-06	9.2e-06	Higher in CRC
Mucilaginibacter daejeonensis	1.57e-05	6.89e-06	8.83e-06	Higher in CRC
Kluyvera intermedia	1.57e-05	8.3e-06	7.41e-06	Higher in CRC
Sandaracinus amylolyticus	1.57e-05	8.77e-06	6.94e-06	Higher in CRC
Capnocytophaga haemolytica	1.57e-05	9.06e-06	6.66e-06	Higher in CRC
Syntrophobotulus glycolicus	1.57e-05	9.06e-06	6.66e-06	Higher in CRC
Fibrella aestuarina	1.57e-05	9.62e-06	6.09e-06	Higher in CRC
Defluviitalea saccharophila	1.57e-05	9.81e-06	5.9e-06	Higher in CRC
Pectinatus frisingensis	1.57e-05	1.21e-05	3.64e-06	Higher in CRC
Desulfovibrio fairfieldensis	0.000248	0.000258	-9.97e-06	Lower in CRC
Photobacterium damselae	1.57e-05	1.31e-05	2.6e-06	Higher in CRC
Enterobacter sp. E20	1.54e-05	7.55e-07	1.46e-05	Higher in CRC
Serratia rubidaea	1.54e-05	1.13e-06	1.42e-05	Higher in CRC
Bradyrhizobium barranii	1.54e-05	2.36e-06	1.3e-05	Higher in CRC
Atlantibacter hermannii	1.54e-05	3.02e-06	1.23e-05	Higher in CRC
Halosquirtibacter laminarini	1.54e-05	3.49e-06	1.19e-05	Higher in CRC
Rhodococcoides fascians	1.54e-05	3.68e-06	1.17e-05	Higher in CRC
Sinorhizobium meliloti	1.54e-05	3.87e-06	1.15e-05	Higher in CRC
Dehalococcoides mccartyi	1.54e-05	4.53e-06	1.08e-05	Higher in CRC
Peptoniphilus equinus	1.54e-05	4.91e-06	1.05e-05	Higher in CRC
Gloeocapsopsis dulcis	1.54e-05	5.19e-06	1.02e-05	Higher in CRC
Paenibacillus sp. FSL R7-0273	1.54e-05	5.38e-06	9.98e-06	Higher in CRC
Streptococcus equi	1.54e-05	5.47e-06	9.89e-06	Higher in CRC
Hymenobacter tibetensis	1.54e-05	5.94e-06	9.41e-06	Higher in CRC
Achromobacter spanius	1.54e-05	6.04e-06	9.32e-06	Higher in CRC
Caloramator sp. Dgby_cultured_2	1.54e-05	6.23e-06	9.13e-06	Higher in CRC
Tannockella kyphosi	1.54e-05	7.83e-06	7.53e-06	Higher in CRC
Catalinimonas niigatensis	1.54e-05	8.3e-06	7.06e-06	Higher in CRC
Haemophilus pittmaniae	2.14e-06	1.19e-05	-9.74e-06	Lower in CRC
Levilactobacillus brevis	5.36e-06	1.51e-05	-9.74e-06	Lower in CRC
[Clostridium] colinum	1.54e-05	8.87e-06	6.49e-06	Higher in CRC
Gottfriedia acidiceleris	1.54e-05	8.96e-06	6.39e-06	Higher in CRC
Staphylococcus epidermidis	1.54e-05	8.96e-06	6.39e-06	Higher in CRC
Mammaliicoccus sciuri	1.54e-05	9.53e-06	5.83e-06	Higher in CRC
Raoultella ornithinolytica	1.54e-05	1.21e-05	3.28e-06	Higher in CRC
Mobiluncus curtisii	1.5e-05	0	1.5e-05	Higher in CRC
Enterobacter sp. ECC-019	1.5e-05	1.42e-06	1.36e-05	Higher in CRC
Massilia cellulosiltytica	1.5e-05	1.98e-06	1.3e-05	Higher in CRC
Aggregatimonas sangjinii	1.5e-05	2.08e-06	1.29e-05	Higher in CRC
Geomonas oryzisoli	1.5e-05	2.08e-06	1.29e-05	Higher in CRC
Enterobacter soli	1.5e-05	2.36e-06	1.26e-05	Higher in CRC
Desulfoluna limicola	1.5e-05	3.02e-06	1.2e-05	Higher in CRC
Shewanella algae	1.5e-05	3.21e-06	1.18e-05	Higher in CRC
Brevibacterium sp. BRM-1	1.5e-05	4.62e-06	1.04e-05	Higher in CRC
Bacillus pumilus	1.5e-05	5.75e-06	9.25e-06	Higher in CRC
Sphingobacterium bambusae	1.5e-05	5.85e-06	9.15e-06	Higher in CRC
Capnocytophaga granulosa	1.5e-05	6.6e-06	8.4e-06	Higher in CRC
Chitinophaga filiformis	1.5e-05	7.08e-06	7.92e-06	Higher in CRC
Selenomonas sp. oral taxon 126	4.61e-05	5.57e-05	-9.59e-06	Lower in CRC
Campylobacter coli	1.5e-05	7.36e-06	7.64e-06	Higher in CRC
Fastidiosipila sanguinis	1.5e-05	9.25e-06	5.75e-06	Higher in CRC
Clostridium sp. OS1-26	1.5e-05	9.53e-06	5.47e-06	Higher in CRC
Ligilactobacillus acidipiscis	3.93e-06	1.35e-05	-9.56e-06	Lower in CRC
Clostridium sp. MB40-C1	1.5e-05	9.53e-06	5.47e-06	Higher in CRC
Fusobacterium ulcerans	1.5e-05	9.62e-06	5.38e-06	Higher in CRC
Gemella sanguinis	1.5e-05	1.37e-05	1.32e-06	Higher in CRC
Lactococcus cremoris	1.5e-05	1.44e-05	5.66e-07	Higher in CRC
Aeromonas sp. ASNIH3	1.46e-05	0	1.46e-05	Higher in CRC
Azoarcus sp. DD4	1.46e-05	2.08e-06	1.26e-05	Higher in CRC
Sanyastnella coralliicola	1.46e-05	2.26e-06	1.24e-05	Higher in CRC
Capnocytophaga stomatis	1.46e-05	2.83e-06	1.18e-05	Higher in CRC
Streptomyces chartreusis	1.46e-05	3.4e-06	1.12e-05	Higher in CRC
Aeromonas media	1.46e-05	3.68e-06	1.1e-05	Higher in CRC
Edwardsiella tarda	1.46e-05	3.96e-06	1.07e-05	Higher in CRC
Pseudopedobacter saltans	1.46e-05	4.34e-06	1.03e-05	Higher in CRC
Nannocystis poenicansa	1.46e-05	5.19e-06	9.45e-06	Higher in CRC
Hymenobacter sp. 5317J-9	1.46e-05	5.28e-06	9.36e-06	Higher in CRC
Streptomyces virginiae	1.46e-05	5.85e-06	8.79e-06	Higher in CRC
Rufibacter radiotolerans	1.46e-05	6.23e-06	8.42e-06	Higher in CRC
Ruminiclostridium cellulolyticum	1.46e-05	6.42e-06	8.23e-06	Higher in CRC
Sporomusa aerivorans	1.46e-05	6.79e-06	7.85e-06	Higher in CRC
Comamonas testosteroni	1.46e-05	7.45e-06	7.19e-06	Higher in CRC
Streptomyces noursei	1.46e-05	7.64e-06	7e-06	Higher in CRC
Rhizobium etli	1.46e-05	7.92e-06	6.72e-06	Higher in CRC
Bifidobacterium imperatoris	1.46e-05	7.92e-06	6.72e-06	Higher in CRC
Haloimpatiens sp. FM7330	1.46e-05	9.62e-06	5.02e-06	Higher in CRC
Kosakonia cowanii	1.46e-05	1.07e-05	3.98e-06	Higher in CRC
Haemophilus haemolyticus	1.46e-05	1.26e-05	2e-06	Higher in CRC
Clostridium manihotivorum	1.46e-05	1.28e-05	1.81e-06	Higher in CRC
Streptomyces sp. NBC_01296	1.43e-05	0	1.43e-05	Higher in CRC
Pseudomonas sp. QE6	1.43e-05	1.42e-06	1.29e-05	Higher in CRC
Xanthomonas hortorum	1.43e-05	2.45e-06	1.18e-05	Higher in CRC
Gordonia sp. w5E2	1.43e-05	2.55e-06	1.17e-05	Higher in CRC
Sulfitobacter faviae	1.43e-05	4.25e-06	1e-05	Higher in CRC
Roseovarius indicus	1.43e-05	4.43e-06	9.85e-06	Higher in CRC
Paenibacillus sp. 32O-W	1.43e-05	4.62e-06	9.66e-06	Higher in CRC
Paenibacillus yonginensis	1.43e-05	4.91e-06	9.38e-06	Higher in CRC
Pseudocnuella soli	1.43e-05	5.28e-06	9e-06	Higher in CRC
Trichlorobacter lovleyi	1.43e-05	5.66e-06	8.63e-06	Higher in CRC
Alicycliphilus denitrificans	1.43e-05	6.23e-06	8.06e-06	Higher in CRC
Dactylosporangium sp. NBC_01737	1.43e-05	6.89e-06	7.4e-06	Higher in CRC
Lancefieldella sp. Marseille-Q7238	1.43e-05	6.98e-06	7.3e-06	Higher in CRC
Gelria sp. Kuro-4	1.43e-05	7.64e-06	6.64e-06	Higher in CRC
Clostridium scatologenes	1.43e-05	7.92e-06	6.36e-06	Higher in CRC
Bradyrhizobium erythrophlei	1.43e-05	8.11e-06	6.17e-06	Higher in CRC
Mycoavidus sp. SF9855	1.39e-05	9.43e-08	1.38e-05	Higher in CRC
Paenibacillus sp. FSL K6-1330	1.39e-05	1.89e-07	1.37e-05	Higher in CRC
Paracoccus denitrificans	1.39e-05	1.04e-06	1.29e-05	Higher in CRC
Micromonospora sp. FIMYZ51	1.39e-05	3.02e-06	1.09e-05	Higher in CRC
Lewinella sp. LCG006	1.39e-05	3.3e-06	1.06e-05	Higher in CRC
Solitalea lacus	1.39e-05	3.68e-06	1.02e-05	Higher in CRC
Chryseobacterium sp. 6424	1.39e-05	3.87e-06	1.01e-05	Higher in CRC
Empedobacter brevis	1.39e-05	4.15e-06	9.78e-06	Higher in CRC
Enterobacter sp. SA187	7.14e-07	9.91e-06	-9.19e-06	Lower in CRC
Arcticibacter sp. MXS-1	1.39e-05	4.15e-06	9.78e-06	Higher in CRC
Fulvivirga maritima	1.39e-05	4.53e-06	9.4e-06	Higher in CRC
Kytococcus sedentarius	1.39e-05	4.81e-06	9.12e-06	Higher in CRC
Hymenobacter yonginensis	1.39e-05	4.91e-06	9.02e-06	Higher in CRC
Flavobacterium anhuiense	1.39e-05	5.19e-06	8.74e-06	Higher in CRC
Metabacillus litoralis	1.39e-05	5.38e-06	8.55e-06	Higher in CRC
Mucilaginibacter sp. SMC90	1.39e-05	5.57e-06	8.36e-06	Higher in CRC
Fenollaria sporofastidiosus	1.39e-05	5.85e-06	8.08e-06	Higher in CRC
Hymenobacter busanensis	1.39e-05	6.04e-06	7.89e-06	Higher in CRC
Nocardia cyriacigeorgica	1.39e-05	6.04e-06	7.89e-06	Higher in CRC
Staphylococcus hominis	1.39e-05	7.08e-06	6.85e-06	Higher in CRC
Campylobacter lari	1.39e-05	8.87e-06	5.06e-06	Higher in CRC
Clostridium cellulovorans	1.39e-05	1.06e-05	3.36e-06	Higher in CRC
Lactobacillus johnsonii	1.39e-05	1.25e-05	1.48e-06	Higher in CRC
Secundilactobacillus malefermentans	1.36e-05	1.89e-07	1.34e-05	Higher in CRC
Aequorivita marisscotiae	1.36e-05	1.42e-06	1.22e-05	Higher in CRC
Microvirga sp. RSM25	1.36e-05	1.42e-06	1.22e-05	Higher in CRC
Streptomyces actuosus	1.36e-05	1.6e-06	1.2e-05	Higher in CRC
Trueperella bernardiae	1.36e-05	1.79e-06	1.18e-05	Higher in CRC
Streptomyces microflavus	1.36e-05	1.89e-06	1.17e-05	Higher in CRC
Rhizobium phaseoli	1.36e-05	2.08e-06	1.15e-05	Higher in CRC
Peptoniphilus genitalis	1.36e-05	2.17e-06	1.14e-05	Higher in CRC
Cyclonatronum proteinivorum	1.36e-05	2.26e-06	1.13e-05	Higher in CRC
Paradevosia shaoguanensis	1.36e-05	2.64e-06	1.09e-05	Higher in CRC
Ferribacterium limneticum	1.36e-05	2.92e-06	1.06e-05	Higher in CRC
Pseudodesulfovibrio aespoeensis	1.36e-05	3.02e-06	1.06e-05	Higher in CRC
Spirosoma rigui	1.36e-05	3.21e-06	1.04e-05	Higher in CRC
Paenibacillus sp. PL2-23	1.36e-05	3.58e-06	9.99e-06	Higher in CRC
Streptomyces niveus	1.36e-05	3.58e-06	9.99e-06	Higher in CRC
Flavobacterium ginsengisoli	1.36e-05	3.77e-06	9.8e-06	Higher in CRC
Shewanella putrefaciens	0	8.96e-06	-8.96e-06	Lower in CRC
Paraburkholderia fungorum	1.36e-05	3.87e-06	9.7e-06	Higher in CRC
Actinoplanes sp. L3-i22	1.36e-05	4.15e-06	9.42e-06	Higher in CRC
Skermanella cutis	1.36e-05	4.25e-06	9.33e-06	Higher in CRC
Geothrix sp. 21YS21S-2	1.36e-05	4.25e-06	9.33e-06	Higher in CRC
Treponema socranskii	1.36e-05	4.34e-06	9.23e-06	Higher in CRC
Corallococcus coralloides	1.36e-05	4.43e-06	9.14e-06	Higher in CRC
Mucilaginibacter sp. CSA2-8R	1.36e-05	4.72e-06	8.85e-06	Higher in CRC
Chitinophaga pinensis	1.36e-05	4.81e-06	8.76e-06	Higher in CRC
Hymenobacter sp. DG01	1.36e-05	5.09e-06	8.48e-06	Higher in CRC
Paenibacillus macerans	1.36e-05	5.09e-06	8.48e-06	Higher in CRC
Fusobacterium hominis	1.36e-05	5.19e-06	8.38e-06	Higher in CRC
Runella rosea	1.36e-05	5.75e-06	7.82e-06	Higher in CRC
Xanthomonas phaseoli	1.36e-05	6.04e-06	7.53e-06	Higher in CRC
Pirellulimonas nuda	1.36e-05	6.13e-06	7.44e-06	Higher in CRC
Lacticaseibacillus paracasei	1.36e-05	1.12e-05	2.35e-06	Higher in CRC
Enterobacter cloacae complex sp. EB5	1.32e-05	0	1.32e-05	Higher in CRC
Streptomyces sp. NBC_00645	1.32e-05	1.89e-07	1.3e-05	Higher in CRC
Enterobacter sp. DNB-S2	1.32e-05	2.83e-07	1.29e-05	Higher in CRC
Luteolibacter sp. AS25	1.32e-05	9.43e-07	1.23e-05	Higher in CRC
Mycoplasmopsis bovis	1.32e-05	1.13e-06	1.21e-05	Higher in CRC
Paraburkholderia phenoliruptrix	1.32e-05	1.51e-06	1.17e-05	Higher in CRC
Mucilaginibacter ginsenosidivorans	1.32e-05	1.89e-06	1.13e-05	Higher in CRC
Caulobacter vibrioides	1.32e-05	1.89e-06	1.13e-05	Higher in CRC
Hoeflea sp. Naph1	1.32e-05	2.08e-06	1.11e-05	Higher in CRC
Flavobacterium psychrotrophum	1.32e-05	2.36e-06	1.09e-05	Higher in CRC
Burkholderia thailandensis	1.32e-05	2.45e-06	1.08e-05	Higher in CRC
Metapseudomonas otitidis	1.32e-05	2.55e-06	1.07e-05	Higher in CRC
Treponema sp. OMZ 803	1.32e-05	3.02e-06	1.02e-05	Higher in CRC
Anaerococcus obesiensis	1.32e-05	3.3e-06	9.91e-06	Higher in CRC
Flavobacterium flavigenum	1.32e-05	3.68e-06	9.54e-06	Higher in CRC
Pimelobacter simplex	1.32e-05	3.68e-06	9.54e-06	Higher in CRC
Hymenobacter sp. YIM 151858-1	1.32e-05	3.77e-06	9.44e-06	Higher in CRC
Hymenobacter sp. YIM 151500-1	1.32e-05	3.96e-06	9.25e-06	Higher in CRC
Mucilaginibacter mali	1.32e-05	4.43e-06	8.78e-06	Higher in CRC
Alcanivorax sp.	1.32e-05	5e-06	8.21e-06	Higher in CRC
Streptomyces fradiae	1.32e-05	5.19e-06	8.03e-06	Higher in CRC
Streptococcus rubneri	1.32e-05	5.47e-06	7.74e-06	Higher in CRC
Haliscomenobacter hydrossis	1.32e-05	5.85e-06	7.37e-06	Higher in CRC
Elusimicrobium minutum	8.21e-06	1.69e-05	-8.67e-06	Lower in CRC
Vreelandella aquamarina	1.32e-05	6.42e-06	6.8e-06	Higher in CRC
Hymenobacter sp. GOD-10R	1.32e-05	6.6e-06	6.61e-06	Higher in CRC
Ramlibacter tataouinensis	1.32e-05	7.64e-06	5.57e-06	Higher in CRC
Cellulosilyticum sp. WCF-2	1.32e-05	8.49e-06	4.72e-06	Higher in CRC
Hymenobacter nivis	1.32e-05	9.06e-06	4.16e-06	Higher in CRC
Comamonas aquatica	1.32e-05	9.25e-06	3.97e-06	Higher in CRC
Haloimpatiens lingqiaonensis	1.32e-05	9.25e-06	3.97e-06	Higher in CRC
Klebsiella africana	1.32e-05	1.32e-05	6.74e-09	Higher in CRC
Citrobacter sp. C13	1.29e-05	0	1.29e-05	Higher in CRC
Aeromonas sp. A-8	1.29e-05	6.6e-07	1.22e-05	Higher in CRC
Chryseobacterium nakagawai	1.29e-05	1.32e-06	1.15e-05	Higher in CRC
Paenibacillus sp. HWE-109	1.29e-05	1.51e-06	1.13e-05	Higher in CRC
Burkholderia vietnamiensis	1.29e-05	1.7e-06	1.12e-05	Higher in CRC
Photobacterium sp. DA100	1.29e-05	1.79e-06	1.11e-05	Higher in CRC
Candidatus Contubernalis alkalaceticus	1.29e-05	2.26e-06	1.06e-05	Higher in CRC
Tellurirhabdus bombi	1.29e-05	2.36e-06	1.05e-05	Higher in CRC
Leadbetterella byssophila	1.29e-05	2.45e-06	1.04e-05	Higher in CRC
Rhizobium rhizogenes	1.29e-05	2.55e-06	1.03e-05	Higher in CRC
Spirosoma pollinicola	1.29e-05	3.21e-06	9.65e-06	Higher in CRC
Sinomicrobium kalidii	1.29e-05	3.3e-06	9.56e-06	Higher in CRC
[Actinomadura] parvosata	1.29e-05	3.4e-06	9.46e-06	Higher in CRC
Biomaibacter acetigenes	1.29e-05	3.68e-06	9.18e-06	Higher in CRC
Thermincola potens	1.29e-05	3.77e-06	9.08e-06	Higher in CRC
Edaphobacter flagellatus	1.29e-05	3.87e-06	8.99e-06	Higher in CRC
Imperialibacter roseus	1.29e-05	4.43e-06	8.42e-06	Higher in CRC
Paenibacillus rhizovicinus	1.29e-05	4.53e-06	8.33e-06	Higher in CRC
Peptoniphilus lacrimalis	1.29e-05	5.09e-06	7.76e-06	Higher in CRC
Candidatus Izemoplasma sp. B36	1.29e-05	5.09e-06	7.76e-06	Higher in CRC
Aeromonas salmonicida	1.29e-05	5.47e-06	7.39e-06	Higher in CRC
Paenibacillus sp. FSL K6-1096	1.29e-05	6.32e-06	6.54e-06	Higher in CRC
Arthrobacter alpinus	1.29e-05	6.51e-06	6.35e-06	Higher in CRC
Chryseobacterium gleum	1.29e-05	6.89e-06	5.97e-06	Higher in CRC
Crassaminicella thermophila	1.29e-05	7.55e-06	5.31e-06	Higher in CRC
Clostridium tagluense	1.29e-05	7.83e-06	5.03e-06	Higher in CRC
Cohnella sp. WGS1546	1.29e-05	7.83e-06	5.03e-06	Higher in CRC
Hathewaya histolytica	1.29e-05	8.77e-06	4.08e-06	Higher in CRC
Caminicella sporogenes	1.29e-05	8.77e-06	4.08e-06	Higher in CRC
Clostridium sp. JN-9	1.29e-05	8.96e-06	3.89e-06	Higher in CRC
Brachyspira pilosicoli	1.29e-05	1.12e-05	1.63e-06	Higher in CRC
Cupriavidus basilensis	1.25e-05	1.42e-06	1.11e-05	Higher in CRC
Terribacillus sp. FSL K6-0262	1.25e-05	1.6e-06	1.09e-05	Higher in CRC
Streptococcus sp. KHUD_011	1.25e-05	1.6e-06	1.09e-05	Higher in CRC
Aequorivita ciconiae	1.25e-05	2.08e-06	1.04e-05	Higher in CRC
Nibricoccus sp. IMCC34717	1.25e-05	2.08e-06	1.04e-05	Higher in CRC
Roseibium aggregatum	1.25e-05	2.08e-06	1.04e-05	Higher in CRC
Pectobacterium brasiliense	1.25e-05	2.36e-06	1.01e-05	Higher in CRC
Citrobacter sp. RHBSTW-00696	1.25e-05	2.45e-06	1e-05	Higher in CRC
Thauera aminoaromatica	1.25e-05	2.83e-06	9.67e-06	Higher in CRC
Streptomyces sp. NBC_00536	1.25e-05	2.83e-06	9.67e-06	Higher in CRC
Corynebacterium urealyticum	1.25e-05	2.83e-06	9.67e-06	Higher in CRC
Akkermansia sp. RCC_12PD	1.25e-05	2.92e-06	9.58e-06	Higher in CRC
Mycobacteroides abscessus	1.25e-05	2.92e-06	9.58e-06	Higher in CRC
Leadbettera azotonutricia	1.25e-05	3.21e-06	9.29e-06	Higher in CRC
Luteitalea sp. TBR-22	1.25e-05	3.58e-06	8.92e-06	Higher in CRC
Actinomadura madurae	1.25e-05	3.58e-06	8.92e-06	Higher in CRC
Streptomyces sp. ICC1	0	8.21e-06	-8.21e-06	Lower in CRC
Cloacibacterium caeni	1.25e-05	3.77e-06	8.73e-06	Higher in CRC
Tunicatimonas pelagia	1.25e-05	4.06e-06	8.44e-06	Higher in CRC
Cupriavidus necator	1.25e-05	4.34e-06	8.16e-06	Higher in CRC
Capnocytophaga sp. oral taxon 878	1.25e-05	4.43e-06	8.07e-06	Higher in CRC
Paludibaculum fermentans	1.25e-05	4.43e-06	8.07e-06	Higher in CRC
Paenibacillus beijingensis	1.25e-05	4.43e-06	8.07e-06	Higher in CRC
Enterobacter adelaidei	1.25e-05	4.72e-06	7.78e-06	Higher in CRC
Dyadobacter chenwenxiniae	1.25e-05	4.81e-06	7.69e-06	Higher in CRC
Ectopseudomonas mendocina	1.25e-05	4.91e-06	7.59e-06	Higher in CRC
Paenibacillus sp. JDR-2	1.25e-05	4.91e-06	7.59e-06	Higher in CRC
Tessaracoccus defluvii	1.25e-05	4.91e-06	7.59e-06	Higher in CRC
Paraflavitalea soli	1.25e-05	5.19e-06	7.31e-06	Higher in CRC
Desulfovibrio subterraneus	1.25e-05	5.38e-06	7.12e-06	Higher in CRC
Brevibacillus composti	1.25e-05	5.75e-06	6.75e-06	Higher in CRC
Sedimentibacter sp. MB35-C1	1.25e-05	6.32e-06	6.18e-06	Higher in CRC
Streptococcus macedonicus	0	8.11e-06	-8.11e-06	Lower in CRC
Streptococcus koreensis	1.25e-05	6.32e-06	6.18e-06	Higher in CRC
Vallitalea pronyensis	1.25e-05	6.89e-06	5.61e-06	Higher in CRC
Lactobacillus iners	1.25e-05	7.17e-06	5.33e-06	Higher in CRC
Clostridium acetobutylicum	1.25e-05	7.83e-06	4.67e-06	Higher in CRC
Caloramator sp. E03	1.25e-05	7.92e-06	4.58e-06	Higher in CRC
Haploplasma axanthum	1.25e-05	8.02e-06	4.48e-06	Higher in CRC
Capnocytophaga gingivalis	1.25e-05	9.72e-06	2.78e-06	Higher in CRC
Paenarthrobacter ureafaciens	1.21e-05	5.66e-07	1.16e-05	Higher in CRC
Streptomyces sp. NBC_00828	1.21e-05	1.23e-06	1.09e-05	Higher in CRC
Paenibacillus agaridevorans	1.21e-05	1.42e-06	1.07e-05	Higher in CRC
Shimwellia blattae	1.21e-05	1.89e-06	1.03e-05	Higher in CRC
Fusobacterium hwasookii	1.21e-05	2.17e-06	9.97e-06	Higher in CRC
Opitutus terrae	1.21e-05	2.36e-06	9.78e-06	Higher in CRC
Streptomyces sp. NHF165	1.21e-05	2.55e-06	9.6e-06	Higher in CRC
Treponema parvum	1.21e-05	2.74e-06	9.41e-06	Higher in CRC
Enterococcus hirae	1.21e-05	2.83e-06	9.31e-06	Higher in CRC
Flagellimonas aurea	1.21e-05	3.21e-06	8.94e-06	Higher in CRC
Spirosoma rhododendri	1.21e-05	3.4e-06	8.75e-06	Higher in CRC
Actomonas aquatica	1.21e-05	3.49e-06	8.65e-06	Higher in CRC
Pelobacter propionicus	1.21e-05	3.49e-06	8.65e-06	Higher in CRC
Mahella australiensis	1.21e-05	3.96e-06	8.18e-06	Higher in CRC
Roseomonas cutis	1.21e-05	4.06e-06	8.09e-06	Higher in CRC
Hymenobacter sediminicola	1.21e-05	4.25e-06	7.9e-06	Higher in CRC
Hymenobacter sp. PAMC 26628	1.21e-05	4.53e-06	7.61e-06	Higher in CRC
Desulfovibrio mangrovi	1.21e-05	4.62e-06	7.52e-06	Higher in CRC
Paenibacillus durus	1.21e-05	4.62e-06	7.52e-06	Higher in CRC
Parolsenella massiliensis	6.36e-05	7.15e-05	-7.94e-06	Lower in CRC
Tistrella bauzanensis	1.21e-05	5e-06	7.14e-06	Higher in CRC
Burkholderia ubonensis	1.21e-05	5.47e-06	6.67e-06	Higher in CRC
Pseudomonas protegens	1.21e-05	5.57e-06	6.58e-06	Higher in CRC
Actinacidiphila glaucinigra	1.21e-05	5.66e-06	6.48e-06	Higher in CRC
Hymenobacter oligotrophus	1.21e-05	5.66e-06	6.48e-06	Higher in CRC
Archangium gephyra	1.21e-05	5.75e-06	6.39e-06	Higher in CRC
Algoriphagus sp. NBT04N3	1.21e-05	6.13e-06	6.01e-06	Higher in CRC
Streptomyces rimosus	1.21e-05	6.32e-06	5.82e-06	Higher in CRC
Campylobacter hominis	1.21e-05	6.42e-06	5.73e-06	Higher in CRC
Alicyclobacillus acidocaldarius	1.21e-05	6.89e-06	5.26e-06	Higher in CRC
Clostridium tyrobutyricum	1.21e-05	8.11e-06	4.03e-06	Higher in CRC
Arachnia propionica	1.21e-05	8.68e-06	3.46e-06	Higher in CRC
Acinetobacter pittii	1.21e-05	1.07e-05	1.48e-06	Higher in CRC
Bacillus albus	1.18e-05	0	1.18e-05	Higher in CRC
Shewanella halotolerans	1.18e-05	5.66e-07	1.12e-05	Higher in CRC
Hwangdonia lutea	1.18e-05	1.79e-06	9.99e-06	Higher in CRC
Afipia carboxidovorans	1.18e-05	1.79e-06	9.99e-06	Higher in CRC
Enterobacter sp. RHBSTW-00593	1.18e-05	1.79e-06	9.99e-06	Higher in CRC
Hymenobacter sp. HDW8	1.18e-05	1.89e-06	9.9e-06	Higher in CRC
Candidatus Thiodictyon syntrophicum	1.18e-05	2.08e-06	9.71e-06	Higher in CRC
Scandinavium goeteborgense	1.18e-05	2.08e-06	9.71e-06	Higher in CRC
Vibrio spartinae	1.79e-06	9.62e-06	-7.84e-06	Lower in CRC
Rubrivirga sp. IMCC45206	1.18e-05	2.26e-06	9.52e-06	Higher in CRC
Paenibacillus sp. FSL R5-0490	0	7.83e-06	-7.83e-06	Lower in CRC
Capnocytophaga leadbetteri	1.18e-05	2.36e-06	9.43e-06	Higher in CRC
Empedobacter falsenii	1.18e-05	2.36e-06	9.43e-06	Higher in CRC
Achromobacter deleyi	1.18e-05	2.36e-06	9.43e-06	Higher in CRC
Arthrobacter agilis	1.18e-05	2.36e-06	9.43e-06	Higher in CRC
Hymenobacter sp. BT18	1.18e-05	2.74e-06	9.05e-06	Higher in CRC
Paenibacillus sp. RC67	1.18e-05	2.74e-06	9.05e-06	Higher in CRC
Flavobacterium sp. CLA17	1.18e-05	2.92e-06	8.86e-06	Higher in CRC
Streptomyces sp. NBC_00239	1.18e-05	3.02e-06	8.77e-06	Higher in CRC
Desulfosarcina alkanivorans	1.18e-05	3.3e-06	8.48e-06	Higher in CRC
Flavobacterium sp. SLB02	1.18e-05	3.4e-06	8.39e-06	Higher in CRC
Mogibacterium neglectum	1.18e-05	3.87e-06	7.92e-06	Higher in CRC
Desulforamulus ruminis	1.18e-05	4.53e-06	7.26e-06	Higher in CRC
Pontibacter sp. SGAir0037	1.18e-05	5.09e-06	6.69e-06	Higher in CRC
Cellulosimicrobium cellulans	1.18e-05	5.09e-06	6.69e-06	Higher in CRC
Acidilutibacter cellobiosedens	1.18e-05	5.75e-06	6.03e-06	Higher in CRC
Sphingosinicella microcystinivorans	1.18e-05	5.94e-06	5.84e-06	Higher in CRC
Gemmatirosa kalamazoonensis	1.18e-05	8.02e-06	3.77e-06	Higher in CRC
Novosphingobium decolorationis	1.14e-05	9.43e-07	1.05e-05	Higher in CRC
Paracoccus sp. SCSIO 75233	1.14e-05	1.13e-06	1.03e-05	Higher in CRC
Bombilactobacillus thymidiniphilus	1.14e-05	1.51e-06	9.92e-06	Higher in CRC
Colwellia sp. M166	1.14e-05	1.6e-06	9.82e-06	Higher in CRC
Acinetobacter indicus	1.14e-05	1.7e-06	9.73e-06	Higher in CRC
Roseateles depolymerans	1.14e-05	1.7e-06	9.73e-06	Higher in CRC
Kribbella sp. HUAS MG21	1.14e-05	1.79e-06	9.64e-06	Higher in CRC
Amycolatopsis sp. cg5	1.14e-05	1.89e-06	9.54e-06	Higher in CRC
Flavobacterium galactosidilyticum	1.14e-05	2.08e-06	9.35e-06	Higher in CRC
Marnyiella aurantia	1.14e-05	2.17e-06	9.26e-06	Higher in CRC
Alcaligenes faecalis	1.14e-05	2.17e-06	9.26e-06	Higher in CRC
Mesoterricola silvestris	1.14e-05	2.36e-06	9.07e-06	Higher in CRC
Pseudosulfitobacter pseudonitzschiae	1.14e-05	2.45e-06	8.98e-06	Higher in CRC
Luteolibacter sp. Populi	1.14e-05	2.55e-06	8.88e-06	Higher in CRC
Desulfomicrobium orale	1.14e-05	2.64e-06	8.79e-06	Higher in CRC
Rhodocytophaga rosea	1.14e-05	2.83e-06	8.6e-06	Higher in CRC
Flavobacterium sp. B183	1.14e-05	2.92e-06	8.5e-06	Higher in CRC
Ereboglobus luteus	1.14e-05	3.21e-06	8.22e-06	Higher in CRC
Oceanidesulfovibrio marinus	1.14e-05	3.21e-06	8.22e-06	Higher in CRC
Pontibacter pudoricolor	1.14e-05	3.58e-06	7.84e-06	Higher in CRC
Costertonia aggregata	1.14e-05	3.77e-06	7.65e-06	Higher in CRC
Dickeya zeae	1.14e-05	3.96e-06	7.47e-06	Higher in CRC
Haliangium ochraceum	1.14e-05	3.96e-06	7.47e-06	Higher in CRC
Sporosarcina trichiuri	1.14e-05	3.96e-06	7.47e-06	Higher in CRC
Azospirillum brasilense	1.14e-05	4.15e-06	7.28e-06	Higher in CRC
Mucilaginibacter yixingensis	1.14e-05	4.43e-06	6.99e-06	Higher in CRC
Cohnella candidum	1.14e-05	4.43e-06	6.99e-06	Higher in CRC
Burkholderia gladioli	1.14e-05	4.72e-06	6.71e-06	Higher in CRC
Mucilaginibacter paludis	1.14e-05	4.81e-06	6.62e-06	Higher in CRC
Paenibacillus sp. FSL R7-0331	1.14e-05	4.91e-06	6.52e-06	Higher in CRC
Paenibacillus cellulosilyticus	1.14e-05	5e-06	6.43e-06	Higher in CRC
Arachidicoccus sp. BS20	1.14e-05	5.09e-06	6.33e-06	Higher in CRC
Flavobacterium album	1.14e-05	5.57e-06	5.86e-06	Higher in CRC
Urechidicola croceus	1.14e-05	5.75e-06	5.67e-06	Higher in CRC
Pedobacter endophyticus	1.14e-05	7.08e-06	4.35e-06	Higher in CRC
uncultured Ilyobacter sp.	1.14e-05	7.55e-06	3.88e-06	Higher in CRC
Priestia flexa	1.14e-05	7.64e-06	3.79e-06	Higher in CRC
Virgibacillus necropolis	1.14e-05	8.21e-06	3.22e-06	Higher in CRC
Bifidobacterium asteroides	1.14e-05	9.43e-06	1.99e-06	Higher in CRC
Desulfosarcina ovata	1.14e-05	1e-05	1.43e-06	Higher in CRC
Shewanella sedimentimangrovi	1.11e-05	1.89e-07	1.09e-05	Higher in CRC
Rhizobium sp. AB2/73	1.11e-05	1.89e-07	1.09e-05	Higher in CRC
Corynebacterium casei	1.11e-05	5.66e-07	1.05e-05	Higher in CRC
Pseudonocardia dioxanivorans	1.11e-05	1.23e-06	9.85e-06	Higher in CRC
Enterobacteriaceae endosymbiont of Donacia cinerea	1.11e-05	1.23e-06	9.85e-06	Higher in CRC
Polymorphum gilvum	1.11e-05	1.51e-06	9.56e-06	Higher in CRC
Methylomonas sp. LL1	1.11e-05	1.89e-06	9.18e-06	Higher in CRC
Thioalkalivibrio sulfidiphilus	1.11e-05	2.08e-06	9e-06	Higher in CRC
Streptococcus nidrosiense	1.11e-05	2.08e-06	9e-06	Higher in CRC
Brooklawnia propionicigenes	1.11e-05	2.17e-06	8.9e-06	Higher in CRC
Marinobacter sp. es.042	1.11e-05	2.26e-06	8.81e-06	Higher in CRC
endosymbiont 'TC1' of Trimyema compressum	1.11e-05	2.45e-06	8.62e-06	Higher in CRC
Paracoccus aminovorans	1.11e-05	2.45e-06	8.62e-06	Higher in CRC
Selenomonas sputigena	0.000173	0.000181	-7.45e-06	Lower in CRC
Paenibacillus ihbetae	1.11e-05	2.83e-06	8.24e-06	Higher in CRC
Flagellimonas sp. MMG031	1.11e-05	3.11e-06	7.96e-06	Higher in CRC
Brevundimonas subvibrioides	1.11e-05	3.4e-06	7.68e-06	Higher in CRC
Streptomyces xinghaiensis	1.11e-05	3.4e-06	7.68e-06	Higher in CRC
Megalodesulfovibrio gigas	1.11e-05	4.25e-06	6.83e-06	Higher in CRC
Paenibacillus elgii	1.11e-05	4.34e-06	6.73e-06	Higher in CRC
Azospira restricta	1.11e-05	4.43e-06	6.64e-06	Higher in CRC
Planctomyces sp. SH-PL62	1.11e-05	4.62e-06	6.45e-06	Higher in CRC
Chitinophaga sp. MM2321	1.11e-05	4.62e-06	6.45e-06	Higher in CRC
uncultured Desulfobacter sp.	1.11e-05	4.72e-06	6.35e-06	Higher in CRC
Anaeromyxobacter dehalogenans	1.11e-05	4.81e-06	6.26e-06	Higher in CRC
Solidesulfovibrio carbinoliphilus	1.11e-05	5.19e-06	5.88e-06	Higher in CRC
Haemophilus parahaemolyticus	3.93e-06	1.13e-05	-7.39e-06	Lower in CRC
Rufibacter tibetensis	1.11e-05	5.28e-06	5.79e-06	Higher in CRC
Hymenobacter aerilatus	1.11e-05	5.28e-06	5.79e-06	Higher in CRC
Salinibacter ruber	1.11e-05	5.47e-06	5.6e-06	Higher in CRC
Petrocella atlantisensis	1.11e-05	5.47e-06	5.6e-06	Higher in CRC
Niallia circulans	1.11e-05	5.94e-06	5.13e-06	Higher in CRC
Escherichia sp. F1	1.11e-05	6.04e-06	5.03e-06	Higher in CRC
Paenibacillus lycopersici	1.11e-05	7.74e-06	3.34e-06	Higher in CRC
Aliarcobacter butzleri	1.11e-05	7.92e-06	3.15e-06	Higher in CRC
Chitinophaga horti	1.11e-05	8.02e-06	3.05e-06	Higher in CRC
Photobacterium leiognathi	1.11e-05	9.25e-06	1.83e-06	Higher in CRC
Brevibacillus sp. NSP2.1	1.07e-05	0	1.07e-05	Higher in CRC
Stutzerimonas decontaminans	1.07e-05	9.43e-08	1.06e-05	Higher in CRC
Streptomyces sp. NBC_00354	1.07e-05	1.89e-07	1.05e-05	Higher in CRC
Halomonas sp. Bachu 37	1.07e-05	5.66e-07	1.01e-05	Higher in CRC
Neorhizobium petrolearium	1.07e-05	5.66e-07	1.01e-05	Higher in CRC
Shinella sp. HZN7	1.07e-05	6.6e-07	1.01e-05	Higher in CRC
Streptomyces sp. NBC_01276	1.07e-05	1.04e-06	9.68e-06	Higher in CRC
Streptomyces jietaisiensis	1.07e-05	1.42e-06	9.3e-06	Higher in CRC
Pseudoduganella plicata	1.07e-05	1.7e-06	9.02e-06	Higher in CRC
Thermosediminibacter oceani	1.07e-05	1.7e-06	9.02e-06	Higher in CRC
Flavobacterium sp. WC2430	1.07e-05	1.7e-06	9.02e-06	Higher in CRC
Fontisphaera persica	1.07e-05	1.98e-06	8.73e-06	Higher in CRC
Cardiobacterium hominis	1.07e-05	2.26e-06	8.45e-06	Higher in CRC
Imtechella halotolerans	1.07e-05	2.36e-06	8.36e-06	Higher in CRC
Corynebacterium confusum	1.07e-05	2.36e-06	8.36e-06	Higher in CRC
Ralstonia pseudosolanacearum	1.07e-05	2.45e-06	8.26e-06	Higher in CRC
Fannyhessea vaginae	1.07e-05	2.55e-06	8.17e-06	Higher in CRC
Kluyvera cryocrescens	1.07e-05	2.55e-06	8.17e-06	Higher in CRC
Desulfatibacillum aliphaticivorans	1.07e-05	2.74e-06	7.98e-06	Higher in CRC
Tichowtungia aerotolerans	1.07e-05	2.83e-06	7.88e-06	Higher in CRC
Paenibacillus spongiae	1.07e-05	2.83e-06	7.88e-06	Higher in CRC
Acidipropionibacterium jensenii	1.07e-05	2.83e-06	7.88e-06	Higher in CRC
Aminomonas paucivorans	1.07e-05	2.92e-06	7.79e-06	Higher in CRC
Cupriavidus metallidurans	1.07e-05	3.11e-06	7.6e-06	Higher in CRC
Streptomyces sp. NBC_01216	1.07e-05	3.11e-06	7.6e-06	Higher in CRC
Spirosoma sp. KUDC1026	1.07e-05	3.4e-06	7.32e-06	Higher in CRC
Qipengyuania flava	1.07e-05	3.58e-06	7.13e-06	Higher in CRC
Salidesulfovibrio onnuriiensis	1.07e-05	3.58e-06	7.13e-06	Higher in CRC
Azospirillum argentinense	1.07e-05	3.68e-06	7.04e-06	Higher in CRC
Synechococcus sp. CBW1107	1.07e-05	3.68e-06	7.04e-06	Higher in CRC
Spirosoma montaniterrae	1.07e-05	3.87e-06	6.85e-06	Higher in CRC
Dehalobacter restrictus	1.07e-05	3.87e-06	6.85e-06	Higher in CRC
Gramella sp. MT6	1.07e-05	3.96e-06	6.75e-06	Higher in CRC
Aedoeadaptatus ivorii	1.07e-05	3.96e-06	6.75e-06	Higher in CRC
uncultured Trichococcus sp.	1.07e-05	4.15e-06	6.56e-06	Higher in CRC
Dactylosporangium sp. AC04546	1.07e-05	4.25e-06	6.47e-06	Higher in CRC
Nonomuraea sp. NBC_00507	1.07e-05	4.34e-06	6.37e-06	Higher in CRC
Pseudodesulfovibrio methanolicus	1.07e-05	4.43e-06	6.28e-06	Higher in CRC
Polyangium aurulentum	1.07e-05	4.43e-06	6.28e-06	Higher in CRC
Paenibacillus aurantius	1.07e-05	4.43e-06	6.28e-06	Higher in CRC
Moorella sp. Hama-1	1.07e-05	4.53e-06	6.19e-06	Higher in CRC
Sporomusa rhizae	1.07e-05	4.72e-06	6e-06	Higher in CRC
Brevibacillus sp. WF146	1.07e-05	4.72e-06	6e-06	Higher in CRC
Moorella humiferrea	1.07e-05	4.91e-06	5.81e-06	Higher in CRC
Hafnia alvei	1.07e-05	5e-06	5.71e-06	Higher in CRC
Candidatus Arthromitus sp. SFB-rat-Yit	1.07e-05	5e-06	5.71e-06	Higher in CRC
Brachyspira hyodysenteriae	1.07e-05	5.66e-06	5.05e-06	Higher in CRC
Burkholderia multivorans	1.07e-05	5.75e-06	4.96e-06	Higher in CRC
Winogradskyella forsetii	1.07e-05	6.51e-06	4.2e-06	Higher in CRC
Citrobacter sp. RHBSTW-00127	1.07e-05	7.08e-06	3.64e-06	Higher in CRC
Fenollaria massiliensis	1.07e-05	9.81e-06	9.03e-07	Higher in CRC
Shewanella rhizosphaerae	1.04e-05	0	1.04e-05	Higher in CRC
Geobacillus subterraneus	1.04e-05	8.49e-07	9.51e-06	Higher in CRC
Mesotoga infera	1.04e-05	1.04e-06	9.32e-06	Higher in CRC
Brevibacterium sp. CBA3109	0	7.08e-06	-7.08e-06	Lower in CRC
Methylovirgula sp. 4M-Z18	1.04e-05	1.13e-06	9.23e-06	Higher in CRC
Streptomyces sp. TN58	1.04e-05	1.13e-06	9.23e-06	Higher in CRC
Streptococcus gwangjuense	1.04e-05	1.13e-06	9.23e-06	Higher in CRC
Mucilaginibacter gossypii	1.04e-05	1.23e-06	9.13e-06	Higher in CRC
Cereibacter azotoformans	1.04e-05	1.42e-06	8.94e-06	Higher in CRC
Nonlabens spongiae	1.04e-05	1.51e-06	8.85e-06	Higher in CRC
Magnetospirillum sp. XM-1	1.04e-05	1.51e-06	8.85e-06	Higher in CRC
Pseudodesulfovibrio sediminis	1.04e-05	1.6e-06	8.75e-06	Higher in CRC
Actinokineospora auranticolor	1.04e-05	1.6e-06	8.75e-06	Higher in CRC
Candidatus Desulforudis audaxviator	1.04e-05	1.79e-06	8.56e-06	Higher in CRC
Caldicellulosiruptor acetigenus	1.04e-05	1.89e-06	8.47e-06	Higher in CRC
Clostridium cadaveris	2.86e-05	3.56e-05	-6.99e-06	Lower in CRC
Pseudoroseicyclus sp. CXY001	1.04e-05	1.98e-06	8.38e-06	Higher in CRC
Haloferula helveola	1.04e-05	2.08e-06	8.28e-06	Higher in CRC
Tamlana fucoidanivorans	1.04e-05	2.17e-06	8.19e-06	Higher in CRC
Streptomyces hygroscopicus	1.04e-05	2.17e-06	8.19e-06	Higher in CRC
Actinoplanes sp. N902-109	1.04e-05	2.17e-06	8.19e-06	Higher in CRC
Mucilaginibacter robiniae	1.04e-05	2.26e-06	8.09e-06	Higher in CRC
Streptomyces sp. NBC_00335	1.04e-05	2.26e-06	8.09e-06	Higher in CRC
Enterococcus gilvus	1.04e-05	2.26e-06	8.09e-06	Higher in CRC
Luteolibacter ambystomatis	1.04e-05	2.36e-06	8e-06	Higher in CRC
Neisseria sicca	1.04e-05	2.36e-06	8e-06	Higher in CRC
Staphylococcus arlettae	1.04e-05	2.55e-06	7.81e-06	Higher in CRC
Sphingobacterium mizutaii	1.04e-05	2.55e-06	7.81e-06	Higher in CRC
Plesiomonas shigelloides	1.04e-05	2.74e-06	7.62e-06	Higher in CRC
Methylomusa anaerophila	1.04e-05	2.74e-06	7.62e-06	Higher in CRC
Chroococcidiopsis thermalis	1.04e-05	2.74e-06	7.62e-06	Higher in CRC
Desulfocurvibacter africanus	1.04e-05	2.83e-06	7.53e-06	Higher in CRC
Erysipelothrix rhusiopathiae	1.04e-05	2.83e-06	7.53e-06	Higher in CRC
Nonomuraea gerenzanensis	1.04e-05	2.83e-06	7.53e-06	Higher in CRC
Mucilaginibacter gotjawali	1.04e-05	3.11e-06	7.24e-06	Higher in CRC
Sulfidibacter corallicola	1.04e-05	3.11e-06	7.24e-06	Higher in CRC
Hymenobacter cellulosivorans	1.04e-05	3.21e-06	7.15e-06	Higher in CRC
uncultured Acetobacterium sp.	1.04e-05	3.4e-06	6.96e-06	Higher in CRC
Desulfotomaculum nigrificans	1.04e-05	3.4e-06	6.96e-06	Higher in CRC
Kutzneria sp. CA-103260	1.04e-05	3.4e-06	6.96e-06	Higher in CRC
Polaribacter sp. NJDZ03	1.04e-05	3.58e-06	6.77e-06	Higher in CRC
Alkaliphilus metalliredigens	1.04e-05	3.68e-06	6.68e-06	Higher in CRC
Dyadobacter pollutisoli	1.04e-05	4.06e-06	6.3e-06	Higher in CRC
Desulfuromonas versatilis	1.04e-05	4.15e-06	6.21e-06	Higher in CRC
Paenibacillus sp. MMS20-IR301	1.04e-05	4.25e-06	6.11e-06	Higher in CRC
Spirosoma endbachense	1.04e-05	4.34e-06	6.02e-06	Higher in CRC
Nonomuraea phyllanthi	1.04e-05	4.43e-06	5.92e-06	Higher in CRC
Chitinophaga niabensis	1.04e-05	4.43e-06	5.92e-06	Higher in CRC
Paenibacillus sp. FSL W8-0194	1.04e-05	4.62e-06	5.73e-06	Higher in CRC
Sporomusa acidovorans	1.04e-05	5.47e-06	4.89e-06	Higher in CRC
Vagococcus fluvialis	1.04e-05	5.66e-06	4.7e-06	Higher in CRC
Chryseobacterium arthrosphaerae	1.04e-05	5.75e-06	4.6e-06	Higher in CRC
Tissierella sp. MB52-C2	1.04e-05	6.23e-06	4.13e-06	Higher in CRC
Trueperella pyogenes	1.04e-05	6.42e-06	3.94e-06	Higher in CRC
Haloimpatiens sp. FM7315	1.04e-05	6.98e-06	3.38e-06	Higher in CRC
Terrisporobacter glycolicus	1.04e-05	7.55e-06	2.81e-06	Higher in CRC
Chryseobacterium rhizoplanae	1e-05	0	1e-05	Higher in CRC
Acinetobacter sp. NyZ410	1e-05	0	1e-05	Higher in CRC
Aminobacter sp. UC22_36	1e-05	4.72e-07	9.53e-06	Higher in CRC
Frankia alni	1e-05	4.72e-07	9.53e-06	Higher in CRC
Prosthecochloris sp. HL-130-GSB	1e-05	8.49e-07	9.15e-06	Higher in CRC
Curtobacterium sp. SGAir0471	1e-05	9.43e-07	9.06e-06	Higher in CRC
Clostridium sp. C45	8.43e-05	9.1e-05	-6.75e-06	Lower in CRC
Enterobacter cloacae complex sp. ECL414	1e-05	9.43e-07	9.06e-06	Higher in CRC
Aureimonas mangrovi	1e-05	1.04e-06	8.96e-06	Higher in CRC
Desulfovibrio sp. G11	1e-05	1.04e-06	8.96e-06	Higher in CRC
Nonlabens sp. Hel1_33_55	1e-05	1.13e-06	8.87e-06	Higher in CRC
Amycolatopsis sp. DSM 110486	1e-05	1.23e-06	8.77e-06	Higher in CRC
Wenyingzhuangia fucanilytica	1e-05	1.32e-06	8.68e-06	Higher in CRC
Variovorax sp. V213	1e-05	1.32e-06	8.68e-06	Higher in CRC
Corynebacterium variabile	1e-05	1.51e-06	8.49e-06	Higher in CRC
Myroides fluvii	1e-05	1.51e-06	8.49e-06	Higher in CRC
Streptococcus toyakuensis	1e-05	1.51e-06	8.49e-06	Higher in CRC
Propioniciclava sp. MC1595	1e-05	1.7e-06	8.3e-06	Higher in CRC
Flavobacterium sp. N2038	1e-05	1.89e-06	8.11e-06	Higher in CRC
Bradyrhizobium japonicum	1e-05	1.89e-06	8.11e-06	Higher in CRC
Taurinivorans muris	1e-05	1.98e-06	8.02e-06	Higher in CRC
Antarcticibacterium flavum	1e-05	2.08e-06	7.92e-06	Higher in CRC
Cyclobacterium xiamenense	1e-05	2.08e-06	7.92e-06	Higher in CRC
Pelodictyon luteolum	1e-05	2.17e-06	7.83e-06	Higher in CRC
Shewanella goraebulensis	1e-05	2.26e-06	7.74e-06	Higher in CRC
Caldithrix abyssi	1e-05	2.26e-06	7.74e-06	Higher in CRC
Mesobacillus sp. AQ2	1e-05	2.26e-06	7.74e-06	Higher in CRC
Microbacterium maritypicum	1e-05	2.26e-06	7.74e-06	Higher in CRC
Capsulimonas corticalis	1e-05	2.36e-06	7.64e-06	Higher in CRC
Dyadobacter sandarakinus	1e-05	2.45e-06	7.55e-06	Higher in CRC
Corynebacterium suedekumii	1e-05	2.55e-06	7.45e-06	Higher in CRC
Acetobacterium woodii	1e-05	2.64e-06	7.36e-06	Higher in CRC
Cellulophaga lytica	1e-05	2.74e-06	7.26e-06	Higher in CRC
Caldilinea aerophila	1e-05	2.74e-06	7.26e-06	Higher in CRC
Akkermansia glycaniphila	1e-05	2.83e-06	7.17e-06	Higher in CRC
Limnoglobus roseus	1e-05	2.83e-06	7.17e-06	Higher in CRC
Methylococcus capsulatus	1e-05	2.92e-06	7.08e-06	Higher in CRC
Cohnella herbarum	1e-05	2.92e-06	7.08e-06	Higher in CRC
Solidesulfovibrio carbinolicus	1e-05	3.11e-06	6.89e-06	Higher in CRC
Kutzneria chonburiensis	1e-05	3.21e-06	6.79e-06	Higher in CRC
Acinetobacter towneri	1e-05	3.3e-06	6.7e-06	Higher in CRC
Bernardetia litoralis	1e-05	3.58e-06	6.42e-06	Higher in CRC
Pseudoroseomonas cervicalis	1e-05	3.58e-06	6.42e-06	Higher in CRC
Paracoccus mutanolyticus	0	6.6e-06	-6.6e-06	Lower in CRC
Streptomyces sp. ICC4	0	6.6e-06	-6.6e-06	Lower in CRC
Virgibacillus halodenitrificans	1e-05	3.77e-06	6.23e-06	Higher in CRC
Chryseobacterium sp. POE27	1e-05	3.87e-06	6.13e-06	Higher in CRC
Roseomonas gilardii	1e-05	3.87e-06	6.13e-06	Higher in CRC
Rothia aeria	1e-05	3.96e-06	6.04e-06	Higher in CRC
Anaeromyxobacter oryzae	1e-05	4.06e-06	5.94e-06	Higher in CRC
Nocardia farcinica	1e-05	4.06e-06	5.94e-06	Higher in CRC
Sporomusa termitida	1e-05	4.15e-06	5.85e-06	Higher in CRC
Ureibacillus sp. FSL K6-8385	1e-05	4.25e-06	5.75e-06	Higher in CRC
Paenibacillus glucanolyticus	1e-05	4.43e-06	5.57e-06	Higher in CRC
Piscinibacter gummiphilus	1e-05	4.72e-06	5.28e-06	Higher in CRC
Citrobacter sp. RHB25-C09	1e-05	4.72e-06	5.28e-06	Higher in CRC
Clostridium formicaceticum	1e-05	4.81e-06	5.19e-06	Higher in CRC
Cronobacter dublinensis	1e-05	5.38e-06	4.62e-06	Higher in CRC
Geosporobacter ferrireducens	1e-05	6.13e-06	3.87e-06	Higher in CRC
Paenibacillus sp. FSL K6-1217	1e-05	6.23e-06	3.77e-06	Higher in CRC
Caloranaerobacter azorensis	1e-05	6.89e-06	3.11e-06	Higher in CRC
Clostridium sp. JN-1	1e-05	8.96e-06	1.04e-06	Higher in CRC
Duncaniella sp. B8	9.64e-06	0	9.64e-06	Higher in CRC
Corynebacterium accolens	9.64e-06	1.89e-07	9.45e-06	Higher in CRC
Thiosocius teredinicola	9.64e-06	8.49e-07	8.79e-06	Higher in CRC
Paenibacillus sp. FSL E2-0202	9.64e-06	9.43e-07	8.7e-06	Higher in CRC
Tessaracoccus lacteus	9.64e-06	1.13e-06	8.51e-06	Higher in CRC
Mesorhizobium sp. 113-3-3	9.64e-06	1.42e-06	8.23e-06	Higher in CRC
Pendulispora brunnea	9.64e-06	1.51e-06	8.13e-06	Higher in CRC
Crossiella sp. CA-258035	9.64e-06	1.7e-06	7.94e-06	Higher in CRC
Bordetella hinzii	9.64e-06	2.08e-06	7.57e-06	Higher in CRC
Methylorubrum extorquens	9.64e-06	2.26e-06	7.38e-06	Higher in CRC
Aquisphaera giovannonii	9.64e-06	2.36e-06	7.28e-06	Higher in CRC
Lacunisphaera limnophila	9.64e-06	2.83e-06	6.81e-06	Higher in CRC
Spirosoma taeanense	9.64e-06	2.92e-06	6.72e-06	Higher in CRC
Hymenobacter sedentarius	9.64e-06	3.11e-06	6.53e-06	Higher in CRC
Aquincola tertiaricarbonis	9.64e-06	3.11e-06	6.53e-06	Higher in CRC
Streptomyces phaeochromogenes	9.64e-06	3.11e-06	6.53e-06	Higher in CRC
Neobacillus drentensis	9.64e-06	3.21e-06	6.44e-06	Higher in CRC
Arachidicoccus ginsenosidivorans	9.64e-06	3.3e-06	6.34e-06	Higher in CRC
Desulfosarcina widdelii	9.64e-06	3.49e-06	6.15e-06	Higher in CRC
Mycobacterium tuberculosis	9.64e-06	3.68e-06	5.96e-06	Higher in CRC
Spirosoma oryzicola	9.64e-06	3.77e-06	5.87e-06	Higher in CRC
Mucilaginibacter sp. SJ	9.64e-06	3.77e-06	5.87e-06	Higher in CRC
Dactylosporangium aurantiacum	9.64e-06	3.87e-06	5.77e-06	Higher in CRC
Actinomadura verrucosospora	9.64e-06	3.87e-06	5.77e-06	Higher in CRC
Paenibacillus tianjinensis	9.64e-06	4.06e-06	5.59e-06	Higher in CRC
Vibrio vulnificus	9.64e-06	4.15e-06	5.49e-06	Higher in CRC
Caldicellulosiruptor morganii	9.64e-06	4.25e-06	5.4e-06	Higher in CRC
Shewanella baltica	9.64e-06	4.43e-06	5.21e-06	Higher in CRC
Polynucleobacter necessarius	9.64e-06	4.43e-06	5.21e-06	Higher in CRC
Alteromonas mediterranea	7.14e-06	1.36e-05	-6.44e-06	Lower in CRC
Raoultella planticola	9.64e-06	4.72e-06	4.93e-06	Higher in CRC
Legionella pneumophila	9.64e-06	4.81e-06	4.83e-06	Higher in CRC
Marinitoga aeolica	9.64e-06	5e-06	4.64e-06	Higher in CRC
Echinicola strongylocentroti	9.64e-06	5.19e-06	4.45e-06	Higher in CRC
Neorhizobium galegae	9.64e-06	5.19e-06	4.45e-06	Higher in CRC
Tissierella sp. Yu-01	9.64e-06	5.38e-06	4.27e-06	Higher in CRC
Corynebacterium tuberculostearicum	9.64e-06	5.47e-06	4.17e-06	Higher in CRC
Mucilaginibacter sp. 5C4	9.64e-06	5.57e-06	4.08e-06	Higher in CRC
Gemella sp. zg-570	9.64e-06	5.75e-06	3.89e-06	Higher in CRC
Agrobacterium pusense	9.64e-06	5.75e-06	3.89e-06	Higher in CRC
Spirosoma sp. SC4-14	9.64e-06	5.85e-06	3.79e-06	Higher in CRC
Candidatus Southlakia epibionticum	9.64e-06	6.13e-06	3.51e-06	Higher in CRC
Leptotrichia wadei	9.64e-06	6.7e-06	2.94e-06	Higher in CRC
Mesomycoplasma ovipneumoniae	9.64e-06	6.79e-06	2.85e-06	Higher in CRC
Helicovermis profundi	9.64e-06	6.98e-06	2.66e-06	Higher in CRC
Clostridium cochlearium	9.64e-06	8.21e-06	1.44e-06	Higher in CRC
Streptococcus sp. DAT741	9.29e-06	0	9.29e-06	Higher in CRC
Hydrogenophaga sp. PBL-H3	9.29e-06	6.6e-07	8.63e-06	Higher in CRC
Malaciobacter pacificus	9.29e-06	6.6e-07	8.63e-06	Higher in CRC
Globicatella sp. PHS-GS-PNBC-21-1553	9.29e-06	6.6e-07	8.63e-06	Higher in CRC
Chimaeribacter arupi	9.29e-06	1.04e-06	8.25e-06	Higher in CRC
Tunturiibacter lichenicola	9.29e-06	1.04e-06	8.25e-06	Higher in CRC
Sphingomonas sp. KRR8	9.29e-06	1.23e-06	8.06e-06	Higher in CRC
Chitiniphilus purpureus	9.29e-06	1.32e-06	7.96e-06	Higher in CRC
Amycolatopsis sp. FDAARGOS 1241	9.29e-06	1.32e-06	7.96e-06	Higher in CRC
Agromyces archimandritae	9.29e-06	1.42e-06	7.87e-06	Higher in CRC
Aegicerativicinus sediminis	9.29e-06	1.51e-06	7.78e-06	Higher in CRC
Vibrio cyclitrophicus	9.29e-06	1.51e-06	7.78e-06	Higher in CRC
Streptomyces sp. NBC_01314	9.29e-06	1.51e-06	7.78e-06	Higher in CRC
Pantoea ananatis	9.29e-06	1.6e-06	7.68e-06	Higher in CRC
Bacillus methanolicus	9.29e-06	1.7e-06	7.59e-06	Higher in CRC
Streptomyces atratus	9.29e-06	1.7e-06	7.59e-06	Higher in CRC
Flavobacterium inviolabile	9.29e-06	1.79e-06	7.49e-06	Higher in CRC
Chryseobacterium sp. JJR-5R	9.29e-06	1.79e-06	7.49e-06	Higher in CRC
Chryseobacterium suipulveris	9.29e-06	1.79e-06	7.49e-06	Higher in CRC
Mycolicibacterium monacense	9.29e-06	1.79e-06	7.49e-06	Higher in CRC
Psychrobacter sp. P11G3	9.29e-06	1.79e-06	7.49e-06	Higher in CRC
Acuticoccus sp. MNP-M23	9.29e-06	1.89e-06	7.4e-06	Higher in CRC
Ruminococcus sp. SR1/5	0.000362	0.000368	-6.33e-06	Lower in CRC
Sphingopyxis sp. DBS4	9.29e-06	1.89e-06	7.4e-06	Higher in CRC
Tumebacillus algifaecis	9.29e-06	1.89e-06	7.4e-06	Higher in CRC
Pseudonocardia sp. DSM 110487	9.29e-06	1.89e-06	7.4e-06	Higher in CRC
Niallia sp. RD1	9.29e-06	1.98e-06	7.3e-06	Higher in CRC
Paenibacillus sp. sptzw28	9.29e-06	1.98e-06	7.3e-06	Higher in CRC
Ruficoccus sp. ZRK36	9.29e-06	2.08e-06	7.21e-06	Higher in CRC
Cupriavidus gilardii	9.29e-06	2.17e-06	7.12e-06	Higher in CRC
Paenibacillus sp. FSL H8-0548	9.29e-06	2.36e-06	6.93e-06	Higher in CRC
Breznakiella homolactica	9.29e-06	2.45e-06	6.83e-06	Higher in CRC
Dyadobacter sp. NIV53	9.29e-06	2.55e-06	6.74e-06	Higher in CRC
Streptomyces griseorubiginosus	9.29e-06	2.64e-06	6.64e-06	Higher in CRC
Candidatus Karelsulcia muelleri	9.29e-06	2.74e-06	6.55e-06	Higher in CRC
Pseudodesulfovibrio cashew	9.29e-06	2.74e-06	6.55e-06	Higher in CRC
Klebsiella quasivariicola	1.93e-05	2.56e-05	-6.28e-06	Lower in CRC
Devosia sp. A16	9.29e-06	2.74e-06	6.55e-06	Higher in CRC
Echinicola rosea	9.29e-06	2.83e-06	6.46e-06	Higher in CRC
Chlorobaculum limnaeum	9.29e-06	2.83e-06	6.46e-06	Higher in CRC
Chromobacterium vaccinii	9.29e-06	2.83e-06	6.46e-06	Higher in CRC
Acidisarcina polymorpha	9.29e-06	2.83e-06	6.46e-06	Higher in CRC
Thermanaerosceptrum fracticalcis	9.29e-06	3.02e-06	6.27e-06	Higher in CRC
Caenispirillum salinarum	9.29e-06	3.21e-06	6.08e-06	Higher in CRC
Pedobacter heparinus	9.29e-06	3.77e-06	5.51e-06	Higher in CRC
Tetragenococcus halophilus	9.29e-06	4.06e-06	5.23e-06	Higher in CRC
Herbaspirillum huttiense	9.29e-06	4.15e-06	5.13e-06	Higher in CRC
Anaerococcus mediterraneensis	9.29e-06	4.15e-06	5.13e-06	Higher in CRC
Bacillus pseudomycoides	9.29e-06	4.25e-06	5.04e-06	Higher in CRC
Sporosarcina ureae	9.29e-06	4.72e-06	4.57e-06	Higher in CRC
Phoenicibacter congonensis	9.29e-06	5e-06	4.29e-06	Higher in CRC
Aquipseudomonas alcaligenes	9.29e-06	5.19e-06	4.1e-06	Higher in CRC
Maribacter cobaltidurans	9.29e-06	6.51e-06	2.78e-06	Higher in CRC
Clostridioides sp. ES-S-0054-01	9.29e-06	6.51e-06	2.78e-06	Higher in CRC
Streptomyces sp. NBC_01320	9.29e-06	8.02e-06	1.27e-06	Higher in CRC
Proteus vulgaris	9.29e-06	8.21e-06	1.08e-06	Higher in CRC
Singulisphaera sp. Ch08	9.29e-06	1.04e-06	8.25e-06	Higher in CRC
Denitratisoma sp. DHT3	9.29e-06	1.23e-06	8.06e-06	Higher in CRC
Citrobacter meridianamericanus	9.29e-06	1.7e-06	7.59e-06	Higher in CRC
Peribacillus sp. S4	8.93e-06	0	8.93e-06	Higher in CRC
Dickeya sp. A5611	8.93e-06	0	8.93e-06	Higher in CRC
Enterobacter cloacae complex sp. ECL72	8.93e-06	0	8.93e-06	Higher in CRC
Microvirga sp. 17 mud 1-3	8.93e-06	2.83e-07	8.65e-06	Higher in CRC
Variovorax sp. 38R	8.93e-06	3.77e-07	8.55e-06	Higher in CRC
Bradyrhizobium elkanii	8.93e-06	3.77e-07	8.55e-06	Higher in CRC
Microbacterium amylolyticum	8.93e-06	4.72e-07	8.46e-06	Higher in CRC
Borrelia crocidurae	8.93e-06	4.72e-07	8.46e-06	Higher in CRC
Winkia neuii	8.93e-06	4.72e-07	8.46e-06	Higher in CRC
Providencia sneebia	8.93e-06	5.66e-07	8.36e-06	Higher in CRC
Kribbella sp. NBC_00359	8.93e-06	7.55e-07	8.17e-06	Higher in CRC
Maribacter litopenaei	8.93e-06	8.49e-07	8.08e-06	Higher in CRC
Corynebacterium kroppenstedtii	8.93e-06	8.49e-07	8.08e-06	Higher in CRC
Treponema medium	8.93e-06	8.49e-07	8.08e-06	Higher in CRC
Ornithinimicrobium flavum	8.93e-06	9.43e-07	7.99e-06	Higher in CRC
Alicyclobacillus mengziensis	8.93e-06	1.04e-06	7.89e-06	Higher in CRC
Dermacoccus nishinomiyaensis	8.93e-06	1.13e-06	7.8e-06	Higher in CRC
Alkalihalobacillus sp. LMS39	8.93e-06	1.23e-06	7.7e-06	Higher in CRC
Prosthecochloris sp. GSB1	8.93e-06	1.42e-06	7.51e-06	Higher in CRC
Aerosticca soli	8.93e-06	1.42e-06	7.51e-06	Higher in CRC
Polaromonas sp. JS666	8.93e-06	1.51e-06	7.42e-06	Higher in CRC
Aneurinibacillus sp. Ricciae_BoGa-3	8.93e-06	1.51e-06	7.42e-06	Higher in CRC
Mycolicibacterium fortuitum	8.93e-06	1.51e-06	7.42e-06	Higher in CRC
Desulfoglaeba alkanexedens	8.93e-06	1.6e-06	7.32e-06	Higher in CRC
Paraburkholderia kururiensis	8.93e-06	1.6e-06	7.32e-06	Higher in CRC
Streptococcus intermedius	8.93e-06	1.6e-06	7.32e-06	Higher in CRC
Aequorivita sublithincola	8.93e-06	1.7e-06	7.23e-06	Higher in CRC
Sphingobacterium sp. SYP-B4668	8.93e-06	1.7e-06	7.23e-06	Higher in CRC
Paenibacillus sp. FSL M8-0142	8.93e-06	1.7e-06	7.23e-06	Higher in CRC
Gudongella oleilytica	8.93e-06	1.79e-06	7.14e-06	Higher in CRC
Enterobacter oligotrophicus	8.93e-06	1.98e-06	6.95e-06	Higher in CRC
Geobacter pickeringii	8.93e-06	1.98e-06	6.95e-06	Higher in CRC
Enterobacter huaxiensis	8.93e-06	1.98e-06	6.95e-06	Higher in CRC
Bernardetia sp. ABR2-2B	8.93e-06	2.26e-06	6.66e-06	Higher in CRC
Fidelibacter multiformis	8.93e-06	2.36e-06	6.57e-06	Higher in CRC
Dechloromonas denitrificans	8.93e-06	2.36e-06	6.57e-06	Higher in CRC
Treponema primitia	8.93e-06	2.36e-06	6.57e-06	Higher in CRC
Chitinophaga agri	8.93e-06	2.74e-06	6.19e-06	Higher in CRC
Rothia kristinae	8.93e-06	2.74e-06	6.19e-06	Higher in CRC
Flavobacterium gyeonganense	8.93e-06	2.83e-06	6.1e-06	Higher in CRC
Raoultella terrigena	8.93e-06	2.83e-06	6.1e-06	Higher in CRC
Arthrobacter crystallopoietes	8.93e-06	2.83e-06	6.1e-06	Higher in CRC
Flavobacterium gelatinilyticum	8.93e-06	2.92e-06	6e-06	Higher in CRC
Saccharopolyspora erythraea	8.93e-06	2.92e-06	6e-06	Higher in CRC
Emticicia sp. 21SJ11W-3	8.93e-06	3.02e-06	5.91e-06	Higher in CRC
Marinilongibacter aquaticus	8.93e-06	3.11e-06	5.82e-06	Higher in CRC
Pedobacter sp. SL55	8.93e-06	3.11e-06	5.82e-06	Higher in CRC
Paenibacillus sp. SYP-B4298	8.93e-06	3.21e-06	5.72e-06	Higher in CRC
Macrococcoides caseolyticum	8.93e-06	3.21e-06	5.72e-06	Higher in CRC
Methylobacterium brachiatum	8.93e-06	3.21e-06	5.72e-06	Higher in CRC
Enterobacter cloacae complex sp. Mu1197	8.93e-06	3.21e-06	5.72e-06	Higher in CRC
Vibrio harveyi	8.93e-06	3.3e-06	5.63e-06	Higher in CRC
Burkholderia ambifaria	8.93e-06	3.3e-06	5.63e-06	Higher in CRC
Pyxidicoccus parkwaysis	8.93e-06	3.3e-06	5.63e-06	Higher in CRC
Mongoliitalea daihaiensis	8.93e-06	3.4e-06	5.53e-06	Higher in CRC
Acinetobacter haemolyticus	8.93e-06	3.4e-06	5.53e-06	Higher in CRC
Desulfitobacterium dichloroeliminans	8.93e-06	3.49e-06	5.44e-06	Higher in CRC
Acididesulfobacillus acetoxydans	8.93e-06	3.58e-06	5.34e-06	Higher in CRC
Urbifossiella limnaea	8.93e-06	3.68e-06	5.25e-06	Higher in CRC
Companilactobacillus paralimentarius	8.93e-06	3.68e-06	5.25e-06	Higher in CRC
Desulfococcus multivorans	8.93e-06	3.77e-06	5.15e-06	Higher in CRC
Chryseobacterium gallinarum	8.93e-06	3.87e-06	5.06e-06	Higher in CRC
Candidatus Formimonas warabiya	8.93e-06	3.96e-06	4.97e-06	Higher in CRC
Acetoanaerobium sticklandii	8.93e-06	3.96e-06	4.97e-06	Higher in CRC
Paenibacillus donghaensis	8.93e-06	4.06e-06	4.87e-06	Higher in CRC
Selenobaculum gibii	8.93e-06	4.25e-06	4.68e-06	Higher in CRC
Paenibacillus sp. MBLB4367	8.93e-06	4.25e-06	4.68e-06	Higher in CRC
Tenacibaculum maritimum	8.93e-06	4.34e-06	4.59e-06	Higher in CRC
Candidatus Epulonipiscium viviparus	8.93e-06	4.34e-06	4.59e-06	Higher in CRC
Hymenobacter sp. BRD128	8.93e-06	4.72e-06	4.21e-06	Higher in CRC
Francisella tularensis	8.93e-06	4.81e-06	4.12e-06	Higher in CRC
Paenibacillus sp. PK3_47	8.93e-06	5.19e-06	3.74e-06	Higher in CRC
Nitrospirillum viridazoti	8.93e-06	5.38e-06	3.55e-06	Higher in CRC
Helcococcus kunzii	8.93e-06	5.66e-06	3.27e-06	Higher in CRC
Candidatus Erwinia haradaeae	8.93e-06	6.04e-06	2.89e-06	Higher in CRC
Paenibacillus sp. FSL H8-0332	8.93e-06	6.13e-06	2.8e-06	Higher in CRC
Treponema pedis	8.93e-06	6.23e-06	2.7e-06	Higher in CRC
Clostridium isatidis	1.18e-05	1.77e-05	-5.95e-06	Lower in CRC
Enterococcus sp. FZMF	8.57e-06	0	8.57e-06	Higher in CRC
Burkholderia pseudomallei	2.5e-05	3.09e-05	-5.94e-06	Lower in CRC
Bradyrhizobium sp. 191	8.57e-06	3.77e-07	8.19e-06	Higher in CRC
Paraburkholderia ginsengisoli	8.57e-06	3.77e-07	8.19e-06	Higher in CRC
Nitrosomonas sp. sh817	8.57e-06	5.66e-07	8.01e-06	Higher in CRC
Micromonospora sp. NBC_01412	8.57e-06	6.6e-07	7.91e-06	Higher in CRC
Arthrobacter sp. FB24	8.57e-06	7.55e-07	7.82e-06	Higher in CRC
Cedecea lapagei	8.57e-06	1.13e-06	7.44e-06	Higher in CRC
Nitratireductor kimnyeongensis	8.57e-06	1.13e-06	7.44e-06	Higher in CRC
Tahibacter amnicola	8.57e-06	1.23e-06	7.35e-06	Higher in CRC
Microvirga sp. M2	8.57e-06	1.23e-06	7.35e-06	Higher in CRC
Mycolicibacterium austroafricanum	8.57e-06	1.23e-06	7.35e-06	Higher in CRC
Streptomyces sp. NBC_00015	8.57e-06	1.23e-06	7.35e-06	Higher in CRC
Chlorobium phaeovibrioides	8.57e-06	1.51e-06	7.06e-06	Higher in CRC
Peribacillus sp. SCS-26	8.57e-06	1.51e-06	7.06e-06	Higher in CRC
Actinoplanes missouriensis	8.57e-06	1.51e-06	7.06e-06	Higher in CRC
Comamonas antarctica	8.57e-06	1.7e-06	6.87e-06	Higher in CRC
Gryllotalpicola protaetiae	8.57e-06	1.7e-06	6.87e-06	Higher in CRC
Paraburkholderia acidiphila	8.57e-06	1.7e-06	6.87e-06	Higher in CRC
Flavobacterium sp. KACC 22761	8.57e-06	1.89e-06	6.68e-06	Higher in CRC
Dyadobacter chenhuakuii	8.57e-06	1.89e-06	6.68e-06	Higher in CRC
Alkalihalophilus pseudofirmus	8.57e-06	1.89e-06	6.68e-06	Higher in CRC
Bacillus sp. SCS-153A	8.57e-06	1.98e-06	6.59e-06	Higher in CRC
Nitratireductor aquimarinus	2.14e-06	8.02e-06	-5.88e-06	Lower in CRC
Streptomyces coeruleorubidus	8.57e-06	1.98e-06	6.59e-06	Higher in CRC
Pseudoalteromonas sp. KJ10-2	8.57e-06	2.08e-06	6.5e-06	Higher in CRC
Geothrix sp. 21YS21S-4	8.57e-06	2.08e-06	6.5e-06	Higher in CRC
Sphaerotilus microaerophilus	8.57e-06	2.17e-06	6.4e-06	Higher in CRC
Arachidicoccus soli	8.57e-06	2.26e-06	6.31e-06	Higher in CRC
Clostridium septicum	1.54e-05	2.12e-05	-5.87e-06	Lower in CRC
Vibrio alginolyticus	8.57e-06	2.26e-06	6.31e-06	Higher in CRC
Candidatus Desulfovibrio trichonymphae	8.57e-06	2.36e-06	6.21e-06	Higher in CRC
Virgibacillus sp. SK37	8.57e-06	2.45e-06	6.12e-06	Higher in CRC
Paenibacillus silvisoli	8.57e-06	2.45e-06	6.12e-06	Higher in CRC
Azospirillum doebereinerae	8.57e-06	2.55e-06	6.02e-06	Higher in CRC
Neobacillus sp. 114	8.57e-06	2.55e-06	6.02e-06	Higher in CRC
Geoalkalibacter subterraneus	8.57e-06	2.64e-06	5.93e-06	Higher in CRC
Legionella antarctica	1.43e-06	7.26e-06	-5.84e-06	Lower in CRC
Streptomyces tsukubensis	8.57e-06	2.64e-06	5.93e-06	Higher in CRC
Labilithrix luteola	8.57e-06	2.74e-06	5.84e-06	Higher in CRC
Streptomyces europaeiscabiei	8.57e-06	2.74e-06	5.84e-06	Higher in CRC
Gordonia polyisoprenivorans	8.57e-06	2.74e-06	5.84e-06	Higher in CRC
Rubrobacter marinus	8.57e-06	2.74e-06	5.84e-06	Higher in CRC
Olivibacter sp. SDN3	8.57e-06	2.92e-06	5.65e-06	Higher in CRC
Paraburkholderia aromaticivorans	8.57e-06	2.92e-06	5.65e-06	Higher in CRC
Corallococcus macrosporus	8.57e-06	2.92e-06	5.65e-06	Higher in CRC
Cellulophaga sp. L1A9	8.57e-06	3.02e-06	5.55e-06	Higher in CRC
Paraburkholderia terrae	8.57e-06	3.02e-06	5.55e-06	Higher in CRC
Desulfoferula mesophila	8.57e-06	3.02e-06	5.55e-06	Higher in CRC
Bacillus smithii	8.57e-06	3.02e-06	5.55e-06	Higher in CRC
Dactylosporangium fulvum	8.57e-06	3.02e-06	5.55e-06	Higher in CRC
Flavisolibacter ginsenosidimutans	8.57e-06	3.11e-06	5.46e-06	Higher in CRC
Pelosinus fermentans	8.57e-06	3.11e-06	5.46e-06	Higher in CRC
Streptomyces formicae	8.57e-06	3.11e-06	5.46e-06	Higher in CRC
Rugamonas sp. DEMB1	8.57e-06	3.21e-06	5.36e-06	Higher in CRC
Paenibacillus sp. H1-7	8.57e-06	3.21e-06	5.36e-06	Higher in CRC
Mariniplasma anaerobium	8.57e-06	3.21e-06	5.36e-06	Higher in CRC
Lacibacter sediminis	8.57e-06	3.4e-06	5.18e-06	Higher in CRC
Azospirillum thermophilum	8.57e-06	3.58e-06	4.99e-06	Higher in CRC
Pedobacter schmidteae	8.57e-06	3.77e-06	4.8e-06	Higher in CRC
Geobacter sp. SVR	8.57e-06	3.77e-06	4.8e-06	Higher in CRC
Clostridium sp. AWRP	8.57e-06	3.77e-06	4.8e-06	Higher in CRC
Pontibacter korlensis	8.57e-06	3.87e-06	4.7e-06	Higher in CRC
Moorella thermoacetica	8.57e-06	3.87e-06	4.7e-06	Higher in CRC
Cereibacter sphaeroides	8.57e-06	3.87e-06	4.7e-06	Higher in CRC
Amniculibacterium sp. G2-70	8.57e-06	3.96e-06	4.61e-06	Higher in CRC
Sphingobacterium sp. UDSM-2020	8.57e-06	4.53e-06	4.04e-06	Higher in CRC
Fulvivirga ligni	8.57e-06	4.81e-06	3.76e-06	Higher in CRC
Escherichia sp. HH091_1A	8.57e-06	5e-06	3.57e-06	Higher in CRC
Bulleidia sp. zg-1006	8.57e-06	5.09e-06	3.48e-06	Higher in CRC
Paraflavitalea speifideaquila	8.57e-06	5.19e-06	3.38e-06	Higher in CRC
Paenibacillus sp. FSL R7-0345	8.57e-06	5.94e-06	2.63e-06	Higher in CRC
Bifidobacterium sp. ESL0775	8.57e-06	6.7e-06	1.87e-06	Higher in CRC
Flavobacterium sediminis	8.57e-06	7.36e-06	1.21e-06	Higher in CRC
Flavobacterium sp. KBS0721	8.57e-06	7.55e-06	1.02e-06	Higher in CRC
Enterobacter sp. ECC-175	8.21e-06	1.79e-06	6.42e-06	Higher in CRC
Citrobacter sp. CRE-46	8.21e-06	9.43e-08	8.12e-06	Higher in CRC
Dermabacter vaginalis	8.21e-06	6.6e-07	7.55e-06	Higher in CRC
Streptomyces sp. NBC_01224	8.21e-06	6.6e-07	7.55e-06	Higher in CRC
Microlunatus soli	8.21e-06	8.49e-07	7.37e-06	Higher in CRC
Thermotoga caldifontis	8.21e-06	8.49e-07	7.37e-06	Higher in CRC
Pseudooceanicola sp. LIPI14-2-Ac024	8.21e-06	9.43e-07	7.27e-06	Higher in CRC
Enterobacter wuhouensis	8.21e-06	1.13e-06	7.08e-06	Higher in CRC
Paenibacillus sp. FSL P4-0176	8.21e-06	1.13e-06	7.08e-06	Higher in CRC
Duganella sp. BuS-21	8.21e-06	1.23e-06	6.99e-06	Higher in CRC
Bacillus altitudinis	8.21e-06	1.32e-06	6.89e-06	Higher in CRC
Planococcus maritimus	8.21e-06	1.32e-06	6.89e-06	Higher in CRC
Burkholderia stabilis	8.21e-06	1.32e-06	6.89e-06	Higher in CRC
Brucepastera parasyntrophica	8.21e-06	1.42e-06	6.8e-06	Higher in CRC
Cellulomonas sp. JZ18	8.21e-06	1.51e-06	6.7e-06	Higher in CRC
Rubrobacter tropicus	8.21e-06	1.51e-06	6.7e-06	Higher in CRC
Geobacillus genomosp. 3	8.21e-06	1.6e-06	6.61e-06	Higher in CRC
Amycolatopsis nalaikhensis	8.21e-06	1.7e-06	6.52e-06	Higher in CRC
Chlorobium limicola	8.21e-06	1.79e-06	6.42e-06	Higher in CRC
Piscinibacter sp. XHJ-5	8.21e-06	1.79e-06	6.42e-06	Higher in CRC
Myroides albus	8.21e-06	1.89e-06	6.33e-06	Higher in CRC
Belliella baltica	8.21e-06	1.89e-06	6.33e-06	Higher in CRC
Methylobacterium indicum	8.21e-06	1.89e-06	6.33e-06	Higher in CRC
Paenibacillus peoriae	8.21e-06	1.89e-06	6.33e-06	Higher in CRC
Cardiobacterium sp. Marseille-Q4385	8.21e-06	1.98e-06	6.23e-06	Higher in CRC
Verrucomicrobium sp. GAS474	8.21e-06	1.98e-06	6.23e-06	Higher in CRC
Niallia oryzisoli	8.21e-06	1.98e-06	6.23e-06	Higher in CRC
Stenotrophomonas sp. 24(2023)	8.21e-06	2.08e-06	6.14e-06	Higher in CRC
Syntrophotalea acetylenica	8.21e-06	2.08e-06	6.14e-06	Higher in CRC
Janthinobacterium sp. J1-1	8.21e-06	2.17e-06	6.04e-06	Higher in CRC
Desulfoscipio sp. XC116	8.21e-06	2.17e-06	6.04e-06	Higher in CRC
Jonquetella anthropi	8.21e-06	2.26e-06	5.95e-06	Higher in CRC
Chelativorans sp. AA-79	8.21e-06	2.36e-06	5.86e-06	Higher in CRC
Streptomyces collinus	8.21e-06	2.55e-06	5.67e-06	Higher in CRC
Flavobacterium columnare	8.21e-06	2.64e-06	5.57e-06	Higher in CRC
Anoxybacter fermentans	8.21e-06	2.64e-06	5.57e-06	Higher in CRC
Paenibacillus azoreducens	8.21e-06	2.64e-06	5.57e-06	Higher in CRC
Collinsella sp. zg1085	8.21e-06	2.64e-06	5.57e-06	Higher in CRC
Anaerococcus prevotii	8.21e-06	2.74e-06	5.48e-06	Higher in CRC
Conexibacter woesei	8.21e-06	2.83e-06	5.38e-06	Higher in CRC
Rhizobium sp. WYJ-E13	8.21e-06	2.92e-06	5.29e-06	Higher in CRC
Desulfofundulus kuznetsovii	8.21e-06	2.92e-06	5.29e-06	Higher in CRC
Sporolactobacillus sp. Y61	8.21e-06	2.92e-06	5.29e-06	Higher in CRC
Enterococcus durans	8.21e-06	2.92e-06	5.29e-06	Higher in CRC
Flavobacterium sp. KACC 22758	8.21e-06	2.92e-06	5.29e-06	Higher in CRC
Streptomyces olivoreticuli	8.21e-06	3.02e-06	5.2e-06	Higher in CRC
Anaerococcus vaginalis	8.21e-06	3.02e-06	5.2e-06	Higher in CRC
Kiritimatiella glycovorans	8.21e-06	3.11e-06	5.1e-06	Higher in CRC
Candidatus Azobacteroides pseudotrichonymphae	8.21e-06	3.21e-06	5.01e-06	Higher in CRC
Alkaliphilus oremlandii	8.21e-06	3.21e-06	5.01e-06	Higher in CRC
Chryseobacterium balustinum	8.21e-06	3.4e-06	4.82e-06	Higher in CRC
Desulfofarcimen acetoxidans	8.21e-06	3.4e-06	4.82e-06	Higher in CRC
Spiroplasma gladiatoris	8.21e-06	3.4e-06	4.82e-06	Higher in CRC
Flavihumibacter rivuli	8.21e-06	3.49e-06	4.72e-06	Higher in CRC
Nostoc sphaeroides	8.21e-06	3.49e-06	4.72e-06	Higher in CRC
Pontibacter sp. G13	8.21e-06	3.68e-06	4.54e-06	Higher in CRC
Moorena producens	8.21e-06	3.77e-06	4.44e-06	Higher in CRC
Mucilaginibacter ginsenosidivorax	8.21e-06	4.06e-06	4.16e-06	Higher in CRC
Paenibacillus tritici	8.21e-06	4.06e-06	4.16e-06	Higher in CRC
Streptomyces decoyicus	8.21e-06	4.25e-06	3.97e-06	Higher in CRC
Paenibacillus sp. FSL W8-0426	8.21e-06	4.43e-06	3.78e-06	Higher in CRC
Marinobacter sp. MMG032	8.21e-06	4.43e-06	3.78e-06	Higher in CRC
uncultured Anaeromusa sp.	8.21e-06	4.62e-06	3.59e-06	Higher in CRC
Psychrobacillus sp. FSL H8-0483	8.21e-06	4.62e-06	3.59e-06	Higher in CRC
Flavobacterium sp. CFS9	8.21e-06	4.62e-06	3.59e-06	Higher in CRC
Peribacillus asahii	8.21e-06	4.81e-06	3.4e-06	Higher in CRC
Wolbachia endosymbiont of Howardula sp.	2.14e-06	7.74e-06	-5.59e-06	Lower in CRC
Haliovirga abyssi	8.21e-06	5e-06	3.21e-06	Higher in CRC
Kocuria rosea	8.21e-06	5.47e-06	2.74e-06	Higher in CRC
Clostridium fermenticellae	8.21e-06	6.51e-06	1.7e-06	Higher in CRC
Paraclostridium ghonii	8.21e-06	7.08e-06	1.14e-06	Higher in CRC
Algoriphagus halophytocola	8.21e-06	7.74e-06	4.78e-07	Higher in CRC
Pseudomonas sp. S09G 359	7.86e-06	0	7.86e-06	Higher in CRC
Microbacterium plantarum	7.86e-06	0	7.86e-06	Higher in CRC
Streptomyces sp. JUS-F4	7.86e-06	0	7.86e-06	Higher in CRC
Enterobacter sp. DSM 30060	7.86e-06	0	7.86e-06	Higher in CRC
Macrococcoides bohemicum	7.86e-06	2.83e-07	7.57e-06	Higher in CRC
Salinibacterium sp. UTAS2018	7.86e-06	2.83e-07	7.57e-06	Higher in CRC
Roseibacillus persicicus	7.86e-06	3.77e-07	7.48e-06	Higher in CRC
Brachybacterium halotolerans	7.86e-06	3.77e-07	7.48e-06	Higher in CRC
Flavobacterium sangjuense	7.86e-06	4.72e-07	7.39e-06	Higher in CRC
Methylobacterium oryzae	7.86e-06	4.72e-07	7.39e-06	Higher in CRC
Streptomyces sp. ITFR-16	7.86e-06	4.72e-07	7.39e-06	Higher in CRC
Polaribacter sp. HaHaR_3_91	0	5.57e-06	-5.57e-06	Lower in CRC
Qipengyuania sp. HL-TH1	7.86e-06	4.72e-07	7.39e-06	Higher in CRC
Enterobacter sp. SES19	7.86e-06	4.72e-07	7.39e-06	Higher in CRC
Candidatus Ornithobacterium hominis	7.86e-06	6.6e-07	7.2e-06	Higher in CRC
Bordetella trematum	7.86e-06	7.55e-07	7.1e-06	Higher in CRC
Methylobacterium sp. NMS14P	7.86e-06	7.55e-07	7.1e-06	Higher in CRC
Paraburkholderia caribensis	7.86e-06	8.49e-07	7.01e-06	Higher in CRC
Nostoc sp. UHCC 0870	7.86e-06	9.43e-07	6.91e-06	Higher in CRC
Lysobacter sp. KIS68-7	7.86e-06	1.04e-06	6.82e-06	Higher in CRC
Sphingobium sp. YG1	7.86e-06	1.04e-06	6.82e-06	Higher in CRC
Pseudoxanthomonas sp. JBR18	7.86e-06	1.13e-06	6.73e-06	Higher in CRC
Lignipirellula cremea	7.86e-06	1.13e-06	6.73e-06	Higher in CRC
Propioniciclava soli	7.86e-06	1.13e-06	6.73e-06	Higher in CRC
Geovibrio thiophilus	7.86e-06	1.23e-06	6.63e-06	Higher in CRC
Rhodococcus sp. B7740	7.86e-06	1.23e-06	6.63e-06	Higher in CRC
Pontimicrobium sp. IMCC45349	1.07e-06	6.6e-06	-5.53e-06	Lower in CRC
Clostridium sp. 001	1.07e-06	6.6e-06	-5.53e-06	Lower in CRC
Chlorobaculum sp. MV4-Y	7.86e-06	1.32e-06	6.54e-06	Higher in CRC
Bradyrhizobium sp. 170	7.86e-06	1.32e-06	6.54e-06	Higher in CRC
Bifidobacterium pullorum	2.43e-05	2.98e-05	-5.53e-06	Lower in CRC
Granulibacter bethesdensis	7.86e-06	1.32e-06	6.54e-06	Higher in CRC
Arthrobacter sp. PAMC25564	7.86e-06	1.32e-06	6.54e-06	Higher in CRC
Longispora sp. K20-0274	7.86e-06	1.42e-06	6.44e-06	Higher in CRC
Dyadobacter fanqingshengii	7.86e-06	1.51e-06	6.35e-06	Higher in CRC
Pseudomonas fulva	7.86e-06	1.51e-06	6.35e-06	Higher in CRC
Leucobacter allii	7.86e-06	1.51e-06	6.35e-06	Higher in CRC
Pseudoduganella sp. UC29_71	7.86e-06	1.51e-06	6.35e-06	Higher in CRC
Aureibacter tunicatorum	7.86e-06	1.6e-06	6.25e-06	Higher in CRC
Arachidicoccus terrestris	7.86e-06	1.6e-06	6.25e-06	Higher in CRC
Dongshaea marina	7.86e-06	1.6e-06	6.25e-06	Higher in CRC
Neobacillus sp. SCS-31	7.86e-06	1.6e-06	6.25e-06	Higher in CRC
Embleya sp. NBC_00896	7.86e-06	1.6e-06	6.25e-06	Higher in CRC
Corynebacterium aquatimens	7.86e-06	1.6e-06	6.25e-06	Higher in CRC
Nocardia sp. CS682	7.86e-06	1.7e-06	6.16e-06	Higher in CRC
Variovorax sp. UC74_104	7.86e-06	1.7e-06	6.16e-06	Higher in CRC
Spirochaeta thermophila	7.86e-06	1.79e-06	6.06e-06	Higher in CRC
Brevibacillus centrosporus	7.86e-06	1.79e-06	6.06e-06	Higher in CRC
Gaopeijia maritima	7.86e-06	1.89e-06	5.97e-06	Higher in CRC
Rhodobacter xanthinilyticus	7.86e-06	1.89e-06	5.97e-06	Higher in CRC
Azospirillum sp. HJ39	7.86e-06	1.89e-06	5.97e-06	Higher in CRC
Luteolibacter sp. LG18	7.86e-06	1.89e-06	5.97e-06	Higher in CRC
Flavobacterium alkalisoli	7.86e-06	1.98e-06	5.88e-06	Higher in CRC
Staphylococcus pseudintermedius	7.86e-06	1.98e-06	5.88e-06	Higher in CRC
Paenibacillus sp. IHBB 10380	7.86e-06	1.98e-06	5.88e-06	Higher in CRC
Pseudomonas viridiflava	7.86e-06	2.08e-06	5.78e-06	Higher in CRC
Stappia indica	7.86e-06	2.08e-06	5.78e-06	Higher in CRC
Desulfuromonas soudanensis	7.86e-06	2.08e-06	5.78e-06	Higher in CRC
Syntrophotalea carbinolica	7.86e-06	2.08e-06	5.78e-06	Higher in CRC
Thioclava nitratireducens	7.86e-06	2.17e-06	5.69e-06	Higher in CRC
Mesoterricola sediminis	7.86e-06	2.17e-06	5.69e-06	Higher in CRC
Roseomonas mucosa	7.86e-06	2.26e-06	5.59e-06	Higher in CRC
Rubrivivax gelatinosus	7.86e-06	2.26e-06	5.59e-06	Higher in CRC
Halobacillus litoralis	7.86e-06	2.26e-06	5.59e-06	Higher in CRC
Limnochorda pilosa	7.86e-06	2.26e-06	5.59e-06	Higher in CRC
Bacillus atrophaeus	7.86e-06	2.36e-06	5.5e-06	Higher in CRC
Cellulomonas fimi	7.86e-06	2.36e-06	5.5e-06	Higher in CRC
Baekduia soli	7.86e-06	2.36e-06	5.5e-06	Higher in CRC
Actinoplanes sp. NBC_00393	7.86e-06	2.45e-06	5.4e-06	Higher in CRC
Echinicola soli	7.86e-06	2.55e-06	5.31e-06	Higher in CRC
Rhodobacter capsulatus	7.86e-06	2.55e-06	5.31e-06	Higher in CRC
Frigoriglobus tundricola	7.86e-06	2.55e-06	5.31e-06	Higher in CRC
Priestia filamentosa	7.86e-06	2.64e-06	5.22e-06	Higher in CRC
Streptomyces sp. JB150	7.86e-06	2.64e-06	5.22e-06	Higher in CRC
Syntrophobacter fumaroxidans	7.86e-06	2.74e-06	5.12e-06	Higher in CRC
Pseudodesulfovibrio mercurii	7.86e-06	2.92e-06	4.93e-06	Higher in CRC
Flavobacterium sp. CHNK8	7.86e-06	3.02e-06	4.84e-06	Higher in CRC
Geomonas sp. RF6	7.86e-06	3.11e-06	4.74e-06	Higher in CRC
Alicyclobacillus fastidiosus	7.86e-06	3.11e-06	4.74e-06	Higher in CRC
Lautropia mirabilis	7.86e-06	3.3e-06	4.56e-06	Higher in CRC
Flammeovirga kamogawensis	7.86e-06	3.4e-06	4.46e-06	Higher in CRC
Desulfuromonas sp. AOP6	7.86e-06	3.4e-06	4.46e-06	Higher in CRC
Chryseobacterium sp. Chry.R1	7.86e-06	3.49e-06	4.37e-06	Higher in CRC
Niabella yanshanensis	7.86e-06	3.58e-06	4.27e-06	Higher in CRC
Ligilactobacillus murinus	7.86e-06	3.58e-06	4.27e-06	Higher in CRC
Chryseobacterium manosquense	7.86e-06	3.58e-06	4.27e-06	Higher in CRC
Chryseobacterium shandongense	7.86e-06	3.68e-06	4.18e-06	Higher in CRC
Anaeromyxobacter sp. Fw109-5	7.86e-06	3.77e-06	4.08e-06	Higher in CRC
Arenibacter algicola	7.86e-06	3.87e-06	3.99e-06	Higher in CRC
Chryseobacterium fluminis	7.86e-06	3.87e-06	3.99e-06	Higher in CRC
Keratinibaculum paraultunense	7.86e-06	3.87e-06	3.99e-06	Higher in CRC
Macrococcus armenti	7.86e-06	4.06e-06	3.8e-06	Higher in CRC
Sporomusa malonica	7.86e-06	4.15e-06	3.71e-06	Higher in CRC
Micrococcus luteus	7.86e-06	4.34e-06	3.52e-06	Higher in CRC
Staphylococcus haemolyticus	7.86e-06	1.32e-05	-5.35e-06	Lower in CRC
Pedobacter sp. FW305-3-2-15-E-R2A2	7.86e-06	4.53e-06	3.33e-06	Higher in CRC
Candidatus Hepatoplasma crinochetorum	7.86e-06	4.72e-06	3.14e-06	Higher in CRC
Alteracholeplasma palmae	7.86e-06	4.72e-06	3.14e-06	Higher in CRC
Flavobacterium aquiphilum	7.86e-06	4.91e-06	2.95e-06	Higher in CRC
Tissierella carlieri	7.86e-06	5.09e-06	2.76e-06	Higher in CRC
Miniphocaeibacter halophilus	7.86e-06	5.19e-06	2.67e-06	Higher in CRC
Caulobacter segnis	7.86e-06	5.47e-06	2.39e-06	Higher in CRC
Alteromonas macleodii	7.86e-06	5.75e-06	2.1e-06	Higher in CRC
Prescottella equi	7.86e-06	5.75e-06	2.1e-06	Higher in CRC
Thermoanaerobacterium sp. RBIITD	7.86e-06	6.04e-06	1.82e-06	Higher in CRC
Treponema phagedenis	7.86e-06	6.42e-06	1.44e-06	Higher in CRC
Weizmannia sp. FSL K6-0777	7.5e-06	0	7.5e-06	Higher in CRC
Enterobacter sp. Crenshaw	7.5e-06	0	7.5e-06	Higher in CRC
Antarcticibacterium sp. 1MA-6-2	7.5e-06	5.66e-07	6.93e-06	Higher in CRC
Mesorhizobium sp. M3A.F.Ca.ET.080.04.2.1	7.5e-06	5.66e-07	6.93e-06	Higher in CRC
Cupriavidus sp. EM10	7.5e-06	5.66e-07	6.93e-06	Higher in CRC
Winogradskyella sp. HaHa_3_26	7.5e-06	6.6e-07	6.84e-06	Higher in CRC
Leclercia sp. Colony189	3.57e-07	5.66e-06	-5.3e-06	Lower in CRC
Ideonella dechloratans	7.5e-06	6.6e-07	6.84e-06	Higher in CRC
Salinispira pacifica	7.5e-06	7.55e-07	6.75e-06	Higher in CRC
Neisseria lactamica	7.5e-06	8.49e-07	6.65e-06	Higher in CRC
Brevibacillus choshinensis	7.5e-06	9.43e-07	6.56e-06	Higher in CRC
Peterkaempfera bronchialis	7.5e-06	9.43e-07	6.56e-06	Higher in CRC
Trueperella pecoris	7.5e-06	9.43e-07	6.56e-06	Higher in CRC
Phenylobacterium montanum	7.5e-06	1.04e-06	6.46e-06	Higher in CRC
Cyanobacterium aponinum	7.5e-06	1.04e-06	6.46e-06	Higher in CRC
Brevundimonas sp. R86498	7.5e-06	1.13e-06	6.37e-06	Higher in CRC
Pseudodesulfovibrio nedwellii	7.5e-06	1.13e-06	6.37e-06	Higher in CRC
Thermospira aquatica	7.5e-06	1.13e-06	6.37e-06	Higher in CRC
Mycobacterium sp. ELW1	7.5e-06	1.13e-06	6.37e-06	Higher in CRC
Phreatobacter cathodiphilus	7.5e-06	1.23e-06	6.27e-06	Higher in CRC
Janthinobacterium agaricidamnosum	7.5e-06	1.23e-06	6.27e-06	Higher in CRC
Paludibacterium paludis	7.5e-06	1.23e-06	6.27e-06	Higher in CRC
Diaphorobacter sp. HDW4A	7.5e-06	1.32e-06	6.18e-06	Higher in CRC
Globicatella sanguinis	7.5e-06	1.32e-06	6.18e-06	Higher in CRC
Mangrovivirga cuniculi	7.5e-06	1.42e-06	6.08e-06	Higher in CRC
Aquabacter sp. L1I39	7.5e-06	1.42e-06	6.08e-06	Higher in CRC
Thauera sp. JM12B12	7.5e-06	1.42e-06	6.08e-06	Higher in CRC
Fusobacterium canifelinum	7.5e-06	1.42e-06	6.08e-06	Higher in CRC
Streptococcus sp. 116-D4	7.5e-06	1.42e-06	6.08e-06	Higher in CRC
Enterococcus saigonensis	7.5e-06	1.51e-06	5.99e-06	Higher in CRC
Phycicoccus endophyticus	7.5e-06	1.51e-06	5.99e-06	Higher in CRC
Phyllobacterium sp. 628	7.5e-06	1.6e-06	5.9e-06	Higher in CRC
Paenibacillus sp. PAMC21692	7.5e-06	1.6e-06	5.9e-06	Higher in CRC
Mesorhizobium huakuii	7.5e-06	1.6e-06	5.9e-06	Higher in CRC
Neorhizobium sp. NCHU2750	7.5e-06	1.7e-06	5.8e-06	Higher in CRC
Chondromyces crocatus	7.5e-06	1.7e-06	5.8e-06	Higher in CRC
Pedobacter sp. D749	7.5e-06	1.7e-06	5.8e-06	Higher in CRC
Geoalkalibacter halelectricus	7.5e-06	1.79e-06	5.71e-06	Higher in CRC
Granulicella sp. WH15	7.5e-06	1.79e-06	5.71e-06	Higher in CRC
Chryseobacterium gambrini	7.5e-06	1.89e-06	5.61e-06	Higher in CRC
Sinorhizobium medicae	7.5e-06	1.89e-06	5.61e-06	Higher in CRC
Breoghania sp.	7.5e-06	1.89e-06	5.61e-06	Higher in CRC
Desulfolithobacter dissulfuricans	7.5e-06	1.89e-06	5.61e-06	Higher in CRC
Desulfuromonas sp. DDH964	7.5e-06	1.98e-06	5.52e-06	Higher in CRC
Chryseobacterium daecheongense	7.5e-06	2.08e-06	5.42e-06	Higher in CRC
Chenggangzhangella methanolivorans	7.5e-06	2.08e-06	5.42e-06	Higher in CRC
Sphaerochaeta globosa	7.5e-06	2.08e-06	5.42e-06	Higher in CRC
Reichenbachiella carrageenanivorans	7.5e-06	2.17e-06	5.33e-06	Higher in CRC
Starkeya sp. ORNL1	7.5e-06	2.17e-06	5.33e-06	Higher in CRC
Arthrobacter sp. Y-9	7.5e-06	2.17e-06	5.33e-06	Higher in CRC
Exiguobacterium acetylicum	7.5e-06	2.36e-06	5.14e-06	Higher in CRC
Enterobacter sp. RHBSTW-00994	7.5e-06	2.36e-06	5.14e-06	Higher in CRC
Algibacter sp. L1A34	7.5e-06	2.45e-06	5.05e-06	Higher in CRC
Marispirochaeta aestuarii	7.5e-06	2.45e-06	5.05e-06	Higher in CRC
Massilia putida	7.5e-06	2.45e-06	5.05e-06	Higher in CRC
Salipiger sp. H15	7.5e-06	2.55e-06	4.95e-06	Higher in CRC
Desulfobulbus oralis	7.5e-06	2.55e-06	4.95e-06	Higher in CRC
Persicimonas caeni	7.5e-06	2.55e-06	4.95e-06	Higher in CRC
Halomonas sp. THAF12	7.5e-06	2.64e-06	4.86e-06	Higher in CRC
Flavobacterium sp. K5-23	7.5e-06	2.74e-06	4.76e-06	Higher in CRC
Paenibacillus protaetiae	7.5e-06	2.74e-06	4.76e-06	Higher in CRC
Brevibacillus marinus	7.5e-06	2.74e-06	4.76e-06	Higher in CRC
Phytobacter ursingii	7.5e-06	2.83e-06	4.67e-06	Higher in CRC
Thalassolituus oleivorans	7.5e-06	2.83e-06	4.67e-06	Higher in CRC
Candidatus Promineifilum breve	7.5e-06	2.83e-06	4.67e-06	Higher in CRC
Brevibacterium casei	7.5e-06	2.92e-06	4.58e-06	Higher in CRC
Methylobacterium aquaticum	7.5e-06	3.02e-06	4.48e-06	Higher in CRC
Geomonas subterranea	7.5e-06	3.02e-06	4.48e-06	Higher in CRC
Lelliottia amnigena	7.5e-06	3.02e-06	4.48e-06	Higher in CRC
Erysipelothrix larvae	7.5e-06	3.11e-06	4.39e-06	Higher in CRC
Phytohabitans suffuscus	7.5e-06	3.11e-06	4.39e-06	Higher in CRC
Acholeplasma laidlawii	7.5e-06	3.11e-06	4.39e-06	Higher in CRC
Sphaerospermopsis torques-reginae	7.5e-06	3.11e-06	4.39e-06	Higher in CRC
Oceanotoga sp. DSM 15011	7.5e-06	3.11e-06	4.39e-06	Higher in CRC
Flavobacterium sp. TR2	7.5e-06	3.21e-06	4.29e-06	Higher in CRC
Zobellia galactanivorans	7.5e-06	3.21e-06	4.29e-06	Higher in CRC
[truncated: 7,816 more rows]

## Sheet: S4 Individual Flux data
sample_id	diet	Metabolite	WeightedFlux	group	healthy_avg_flux	patient_num
di_p1	Gluten_Free	Acetate	904.025	CRC	530.276	1
di_p1	Gluten_Free	Ammonia	827.21	CRC	710.913	1
di_p1	Gluten_Free	Succinate	342.361	CRC	558.682	1
di_p1	Gluten_Free	Formate	207.778	CRC	301.257	1
di_p1	Gluten_Free	Butyrate	142.881	CRC	119.344	1
di_p1	Gluten_Free	Indole	-68.9908	CRC	-60.468	1
di_p1	Gluten_Free	Hydrogen Sulfide	-38.9221	CRC	11.5365	1
di_p1	Gluten_Free	Trimethylamine	30.0209	CRC	217.576	1
di_p1	Gluten_Free	Putrescine	-0.0291978	CRC	-0.0142275	1
di_p1	Gluten_Free	Propionate	0	CRC	0	1
di_p1	Gluten_Free	Valerate	0	CRC	0	1
di_p1	Gluten_Free	Lactate	0	CRC	0	1
di_p1	Gluten_Free	Phenol	0	CRC	0	1
di_p1	High_Fiber	Acetate	986.984	CRC	949.481	1
di_p1	High_Fiber	Ammonia	767.54	CRC	767.774	1
di_p1	High_Fiber	Succinate	384.072	CRC	252.852	1
di_p1	High_Fiber	Formate	286.318	CRC	409.199	1
di_p1	High_Fiber	Butyrate	139.891	CRC	148.38	1
di_p1	High_Fiber	Trimethylamine	8.37022	CRC	12.5916	1
di_p1	High_Fiber	Indole	1.10808	CRC	1.36363	1
di_p1	High_Fiber	Hydrogen Sulfide	0.268711	CRC	1.2075	1
di_p1	High_Fiber	Putrescine	-0.0392318	CRC	-0.029809	1
di_p1	High_Fiber	Propionate	0	CRC	0	1
di_p1	High_Fiber	Valerate	0	CRC	0	1
di_p1	High_Fiber	Lactate	0	CRC	0	1
di_p1	High_Fiber	Phenol	0	CRC	0	1
di_p1	High_fat	Acetate	945.59	CRC	725.37	1
di_p1	High_fat	Succinate	706.471	CRC	545.285	1
di_p1	High_fat	Ammonia	702.917	CRC	572.431	1
di_p1	High_fat	Formate	155.433	CRC	432.101	1
di_p1	High_fat	Indole	-128.167	CRC	-113.997	1
di_p1	High_fat	Butyrate	128.117	CRC	117.143	1
di_p1	High_fat	Hydrogen Sulfide	-51.2294	CRC	-3.58459	1
di_p1	High_fat	Trimethylamine	3.41104	CRC	0.251808	1
di_p1	High_fat	Putrescine	-0.0144065	CRC	-0.154578	1
di_p1	High_fat	Propionate	0	CRC	0	1
di_p1	High_fat	Valerate	0	CRC	0	1
di_p1	High_fat	Lactate	0	CRC	0	1
di_p1	High_fat	Phenol	0	CRC	0	1
di_p1	High_protein	Acetate	904.315	CRC	631.978	1
di_p1	High_protein	Ammonia	811.814	CRC	767.19	1
di_p1	High_protein	Succinate	377.956	CRC	589.106	1
di_p1	High_protein	Formate	311.316	CRC	583.15	1
di_p1	High_protein	Indole	-134.053	CRC	-120.004	1
di_p1	High_protein	Butyrate	132.223	CRC	117.263	1
di_p1	High_protein	Trimethylamine	33.2761	CRC	213.247	1
di_p1	High_protein	Hydrogen Sulfide	16.2084	CRC	1.10394	1
di_p1	High_protein	Putrescine	-0.0275398	CRC	0.143971	1
di_p1	High_protein	Propionate	0	CRC	0	1
di_p1	High_protein	Valerate	0	CRC	0	1
di_p1	High_protein	Lactate	0	CRC	0	1
di_p1	High_protein	Phenol	0	CRC	0	1
di_p1	Mediterranean	Acetate	932.047	CRC	773.186	1
di_p1	Mediterranean	Ammonia	777.324	CRC	668.537	1
di_p1	Mediterranean	Succinate	286.332	CRC	41.1506	1
di_p1	Mediterranean	Formate	239.269	CRC	496.774	1
di_p1	Mediterranean	Indole	-140.075	CRC	-143.69	1
di_p1	Mediterranean	Butyrate	127.415	CRC	115.103	1
di_p1	Mediterranean	Trimethylamine	26.7935	CRC	215.621	1
di_p1	Mediterranean	Hydrogen Sulfide	18.7147	CRC	1.13583	1
di_p1	Mediterranean	Putrescine	-0.0367261	CRC	-0.0179431	1
di_p1	Mediterranean	Propionate	0	CRC	0	1
di_p1	Mediterranean	Valerate	0	CRC	0	1
di_p1	Mediterranean	Lactate	0	CRC	0	1
di_p1	Mediterranean	Phenol	0	CRC	0	1
di_p1	Vegan	Ammonia	829.848	CRC	736.584	1
di_p1	Vegan	Acetate	813.888	CRC	638.555	1
di_p1	Vegan	Succinate	361.701	CRC	593.779	1
di_p1	Vegan	Butyrate	143.254	CRC	142.61	1
di_p1	Vegan	Formate	113.062	CRC	286.501	1
di_p1	Vegan	Indole	-98.2916	CRC	-125.309	1
di_p1	Vegan	Trimethylamine	27.9564	CRC	250.562	1
di_p1	Vegan	Hydrogen Sulfide	7.87314	CRC	0.674618	1
di_p1	Vegan	Putrescine	-0.0364428	CRC	0.596456	1
di_p1	Vegan	Propionate	0	CRC	0	1
di_p1	Vegan	Valerate	0	CRC	0	1
di_p1	Vegan	Lactate	0	CRC	0	1
di_p1	Vegan	Phenol	0	CRC	0	1
di_p2	Gluten_Free	Ammonia	781.263	CRC	710.913	2
di_p2	Gluten_Free	Acetate	771.258	CRC	530.276	2
di_p2	Gluten_Free	Succinate	417.661	CRC	558.682	2
di_p2	Gluten_Free	Formate	177.77	CRC	301.257	2
di_p2	Gluten_Free	Butyrate	136.97	CRC	119.344	2
di_p2	Gluten_Free	Indole	-59.3742	CRC	-60.468	2
di_p2	Gluten_Free	Hydrogen Sulfide	15.7415	CRC	11.5365	2
di_p2	Gluten_Free	Trimethylamine	4.88405	CRC	217.576	2
di_p2	Gluten_Free	Putrescine	-0.0237008	CRC	-0.0142275	2
di_p2	Gluten_Free	Propionate	0	CRC	0	2
di_p2	Gluten_Free	Valerate	0	CRC	0	2
di_p2	Gluten_Free	Lactate	0	CRC	0	2
di_p2	Gluten_Free	Phenol	0	CRC	0	2
di_p2	High_Fiber	Acetate	983.111	CRC	949.481	2
di_p2	High_Fiber	Ammonia	850.27	CRC	767.774	2
di_p2	High_Fiber	Succinate	458.62	CRC	252.852	2
di_p2	High_Fiber	Formate	363.5	CRC	409.199	2
di_p2	High_Fiber	Butyrate	167.806	CRC	148.38	2
di_p2	High_Fiber	Trimethylamine	2.63416	CRC	12.5916	2
di_p2	High_Fiber	Indole	1.69735	CRC	1.36363	2
di_p2	High_Fiber	Hydrogen Sulfide	1.66461	CRC	1.2075	2
di_p2	High_Fiber	Putrescine	-0.0382995	CRC	-0.029809	2
di_p2	High_Fiber	Propionate	0	CRC	0	2
di_p2	High_Fiber	Valerate	0	CRC	0	2
di_p2	High_Fiber	Lactate	0	CRC	0	2
di_p2	High_Fiber	Phenol	0	CRC	0	2
di_p2	High_fat	Acetate	938.044	CRC	725.37	2
di_p2	High_fat	Ammonia	719.688	CRC	572.431	2
di_p2	High_fat	Succinate	689.668	CRC	545.285	2
di_p2	High_fat	Formate	238.11	CRC	432.101	2
di_p2	High_fat	Butyrate	133.487	CRC	117.143	2
di_p2	High_fat	Indole	-120.526	CRC	-113.997	2
di_p2	High_fat	Hydrogen Sulfide	-5.56579	CRC	-3.58459	2
di_p2	High_fat	Trimethylamine	-0.787599	CRC	0.251808	2
di_p2	High_fat	Putrescine	-0.025039	CRC	-0.154578	2
di_p2	High_fat	Propionate	0	CRC	0	2
di_p2	High_fat	Valerate	0	CRC	0	2
di_p2	High_fat	Lactate	0	CRC	0	2
di_p2	High_fat	Phenol	0	CRC	0	2
di_p2	High_protein	Ammonia	877.145	CRC	767.19	2
di_p2	High_protein	Acetate	806.124	CRC	631.978	2
di_p2	High_protein	Succinate	473.273	CRC	589.106	2
di_p2	High_protein	Formate	336.634	CRC	583.15	2
di_p2	High_protein	Butyrate	134.394	CRC	117.263	2
di_p2	High_protein	Indole	-127.116	CRC	-120.004	2
di_p2	High_protein	Trimethylamine	5.65682	CRC	213.247	2
di_p2	High_protein	Hydrogen Sulfide	2.26014	CRC	1.10394	2
di_p2	High_protein	Putrescine	-0.0212041	CRC	0.143971	2
di_p2	High_protein	Propionate	0	CRC	0	2
di_p2	High_protein	Valerate	0	CRC	0	2
di_p2	High_protein	Lactate	0	CRC	0	2
di_p2	High_protein	Phenol	0	CRC	0	2
di_p2	Mediterranean	Acetate	851.73	CRC	773.186	2
di_p2	Mediterranean	Ammonia	814.681	CRC	668.537	2
di_p2	Mediterranean	Succinate	398.735	CRC	41.1506	2
di_p2	Mediterranean	Formate	219.246	CRC	496.774	2
di_p2	Mediterranean	Indole	-180.935	CRC	-143.69	2
di_p2	Mediterranean	Butyrate	131.595	CRC	115.103	2
di_p2	Mediterranean	Trimethylamine	4.13374	CRC	215.621	2
di_p2	Mediterranean	Hydrogen Sulfide	2.41272	CRC	1.13583	2
di_p2	Mediterranean	Putrescine	-0.0300496	CRC	-0.0179431	2
di_p2	Mediterranean	Propionate	0	CRC	0	2
di_p2	Mediterranean	Valerate	0	CRC	0	2
di_p2	Mediterranean	Lactate	0	CRC	0	2
di_p2	Mediterranean	Phenol	0	CRC	0	2
di_p2	Vegan	Ammonia	855.794	CRC	736.584	2
di_p2	Vegan	Acetate	665.507	CRC	638.555	2
di_p2	Vegan	Succinate	408.676	CRC	593.779	2
di_p2	Vegan	Indole	-147.946	CRC	-125.309	2
di_p2	Vegan	Butyrate	141.458	CRC	142.61	2
di_p2	Vegan	Formate	78.6217	CRC	286.501	2
di_p2	Vegan	Trimethylamine	5.82693	CRC	250.562	2
di_p2	Vegan	Hydrogen Sulfide	1.19173	CRC	0.674618	2
di_p2	Vegan	Putrescine	-0.0365985	CRC	0.596456	2
di_p2	Vegan	Propionate	0	CRC	0	2
di_p2	Vegan	Valerate	0	CRC	0	2
di_p2	Vegan	Lactate	0	CRC	0	2
di_p2	Vegan	Phenol	0	CRC	0	2
di_p3	Gluten_Free	Ammonia	886.354	CRC	710.913	3
di_p3	Gluten_Free	Acetate	857.009	CRC	530.276	3
di_p3	Gluten_Free	Formate	660.529	CRC	301.257	3
di_p3	Gluten_Free	Butyrate	636.058	CRC	119.344	3
di_p3	Gluten_Free	Succinate	319.1	CRC	558.682	3
di_p3	Gluten_Free	Indole	-252.956	CRC	-60.468	3
di_p3	Gluten_Free	Trimethylamine	3.70927	CRC	217.576	3
di_p3	Gluten_Free	Hydrogen Sulfide	1.32939	CRC	11.5365	3
di_p3	Gluten_Free	Putrescine	-0.0101279	CRC	-0.0142275	3
di_p3	Gluten_Free	Propionate	0	CRC	0	3
di_p3	Gluten_Free	Valerate	0	CRC	0	3
di_p3	Gluten_Free	Lactate	0	CRC	0	3
di_p3	Gluten_Free	Phenol	0	CRC	0	3
di_p3	High_Fiber	Acetate	973.009	CRC	949.481	3
di_p3	High_Fiber	Ammonia	939.178	CRC	767.774	3
di_p3	High_Fiber	Succinate	788.475	CRC	252.852	3
di_p3	High_Fiber	Formate	751.101	CRC	409.199	3
di_p3	High_Fiber	Butyrate	719.013	CRC	148.38	3
di_p3	High_Fiber	Indole	4.04626	CRC	1.36363	3
di_p3	High_Fiber	Hydrogen Sulfide	0.218558	CRC	1.2075	3
di_p3	High_Fiber	Putrescine	-0.0126451	CRC	-0.029809	3
di_p3	High_Fiber	Trimethylamine	-8.53358e-193	CRC	12.5916	3
di_p3	High_Fiber	Propionate	0	CRC	0	3
di_p3	High_Fiber	Valerate	0	CRC	0	3
di_p3	High_Fiber	Lactate	0	CRC	0	3
di_p3	High_Fiber	Phenol	0	CRC	0	3
di_p3	High_fat	Acetate	962.006	CRC	725.37	3
di_p3	High_fat	Ammonia	903.165	CRC	572.431	3
di_p3	High_fat	Formate	703.48	CRC	432.101	3
di_p3	High_fat	Butyrate	627.555	CRC	117.143	3
di_p3	High_fat	Succinate	606.585	CRC	545.285	3
di_p3	High_fat	Indole	-560.193	CRC	-113.997	3
di_p3	High_fat	Hydrogen Sulfide	-1.80548	CRC	-3.58459	3
di_p3	High_fat	Putrescine	-0.00430928	CRC	-0.154578	3
di_p3	High_fat	Trimethylamine	-6.07952e-73	CRC	0.251808	3
di_p3	High_fat	Propionate	0	CRC	0	3
di_p3	High_fat	Valerate	0	CRC	0	3
di_p3	High_fat	Lactate	0	CRC	0	3
di_p3	High_fat	Phenol	0	CRC	0	3
di_p3	High_protein	Ammonia	947.848	CRC	767.19	3
di_p3	High_protein	Acetate	885.9	CRC	631.978	3
di_p3	High_protein	Formate	725.024	CRC	583.15	3
di_p3	High_protein	Butyrate	619.689	CRC	117.263	3
di_p3	High_protein	Indole	-567.945	CRC	-120.004	3
di_p3	High_protein	Succinate	498.38	CRC	589.106	3
di_p3	High_protein	Trimethylamine	3.59305	CRC	213.247	3
di_p3	High_protein	Hydrogen Sulfide	0.672549	CRC	1.10394	3
di_p3	High_protein	Putrescine	-0.00859111	CRC	0.143971	3
di_p3	High_protein	Propionate	0	CRC	0	3
di_p3	High_protein	Valerate	0	CRC	0	3
di_p3	High_protein	Lactate	0	CRC	0	3
di_p3	High_protein	Phenol	0	CRC	0	3
di_p3	Mediterranean	Ammonia	941.497	CRC	668.537	3
di_p3	Mediterranean	Acetate	915.33	CRC	773.186	3
di_p3	Mediterranean	Formate	666.31	CRC	496.774	3
di_p3	Mediterranean	Butyrate	614.181	CRC	115.103	3
di_p3	Mediterranean	Indole	-595.086	CRC	-143.69	3
di_p3	Mediterranean	Succinate	467.621	CRC	41.1506	3
di_p3	Mediterranean	Trimethylamine	3.70927	CRC	215.621	3
di_p3	Mediterranean	Hydrogen Sulfide	0.748371	CRC	1.13583	3
di_p3	Mediterranean	Putrescine	-0.0127765	CRC	-0.0179431	3
di_p3	Mediterranean	Propionate	0	CRC	0	3
di_p3	Mediterranean	Valerate	0	CRC	0	3
di_p3	Mediterranean	Lactate	0	CRC	0	3
di_p3	Mediterranean	Phenol	0	CRC	0	3
di_p3	Vegan	Ammonia	933.118	CRC	736.584	3
di_p3	Vegan	Butyrate	645.302	CRC	142.61	3
di_p3	Vegan	Indole	-461.438	CRC	-125.309	3
di_p3	Vegan	Acetate	240.987	CRC	638.555	3
di_p3	Vegan	Succinate	228.143	CRC	593.779	3
di_p3	Vegan	Formate	-126.136	CRC	286.501	3
di_p3	Vegan	Trimethylamine	3.75825	CRC	250.562	3
di_p3	Vegan	Hydrogen Sulfide	0.332455	CRC	0.674618	3
di_p3	Vegan	Putrescine	-0.012828	CRC	0.596456	3
di_p3	Vegan	Propionate	0	CRC	0	3
di_p3	Vegan	Valerate	0	CRC	0	3
di_p3	Vegan	Lactate	0	CRC	0	3
di_p3	Vegan	Phenol	0	CRC	0	3
di_p4	Gluten_Free	Ammonia	880.821	CRC	710.913	4
di_p4	Gluten_Free	Acetate	852.847	CRC	530.276	4
di_p4	Gluten_Free	Formate	651.607	CRC	301.257	4
di_p4	Gluten_Free	Butyrate	625.052	CRC	119.344	4
di_p4	Gluten_Free	Succinate	321.636	CRC	558.682	4
di_p4	Gluten_Free	Indole	-249.066	CRC	-60.468	4
di_p4	Gluten_Free	Trimethylamine	4.85738	CRC	217.576	4
di_p4	Gluten_Free	Hydrogen Sulfide	3.56021	CRC	11.5365	4
di_p4	Gluten_Free	Putrescine	-0.0102906	CRC	-0.0142275	4
di_p4	Gluten_Free	Propionate	0	CRC	0	4
di_p4	Gluten_Free	Valerate	0	CRC	0	4
di_p4	Gluten_Free	Lactate	0	CRC	0	4
di_p4	Gluten_Free	Phenol	0	CRC	0	4
di_p4	High_Fiber	Acetate	974.187	CRC	949.481	4
di_p4	High_Fiber	Ammonia	940.57	CRC	767.774	4
di_p4	High_Fiber	Succinate	780.77	CRC	252.852	4
di_p4	High_Fiber	Formate	744.332	CRC	409.199	4
di_p4	High_Fiber	Butyrate	710.975	CRC	148.38	4
di_p4	High_Fiber	Indole	4.00187	CRC	1.36363	4
di_p4	High_Fiber	Hydrogen Sulfide	0.2561	CRC	1.2075	4
di_p4	High_Fiber	Putrescine	-0.0130462	CRC	-0.029809	4
di_p4	High_Fiber	Trimethylamine	-9.16589e-193	CRC	12.5916	4
di_p4	High_Fiber	Propionate	0	CRC	0	4
di_p4	High_Fiber	Valerate	0	CRC	0	4
di_p4	High_Fiber	Lactate	0	CRC	0	4
di_p4	High_Fiber	Phenol	0	CRC	0	4
di_p4	High_fat	Acetate	959.557	CRC	725.37	4
di_p4	High_fat	Ammonia	898.998	CRC	572.431	4
di_p4	High_fat	Formate	695.061	CRC	432.101	4
di_p4	High_fat	Butyrate	617.238	CRC	117.143	4
di_p4	High_fat	Succinate	606.714	CRC	545.285	4
di_p4	High_fat	Indole	-551.125	CRC	-113.997	4
di_p4	High_fat	Hydrogen Sulfide	0.213045	CRC	-3.58459	4
di_p4	High_fat	Putrescine	-0.00440872	CRC	-0.154578	4
di_p4	High_fat	Trimethylamine	-6.49435e-73	CRC	0.251808	4
di_p4	High_fat	Propionate	0	CRC	0	4
di_p4	High_fat	Valerate	0	CRC	0	4
di_p4	High_fat	Lactate	0	CRC	0	4
di_p4	High_fat	Phenol	0	CRC	0	4
di_p4	High_protein	Ammonia	945.757	CRC	767.19	4
di_p4	High_protein	Acetate	883.555	CRC	631.978	4
di_p4	High_protein	Formate	717.781	CRC	583.15	4
di_p4	High_protein	Butyrate	608.415	CRC	117.263	4
di_p4	High_protein	Indole	-558.842	CRC	-120.004	4
di_p4	High_protein	Succinate	499.344	CRC	589.106	4
di_p4	High_protein	Trimethylamine	4.70518	CRC	213.247	4
di_p4	High_protein	Hydrogen Sulfide	0.0262046	CRC	1.10394	4
di_p4	High_protein	Putrescine	-0.00888052	CRC	0.143971	4
di_p4	High_protein	Propionate	0	CRC	0	4
di_p4	High_protein	Valerate	0	CRC	0	4
di_p4	High_protein	Lactate	0	CRC	0	4
di_p4	High_protein	Phenol	0	CRC	0	4
di_p4	Mediterranean	Ammonia	940.453	CRC	668.537	4
di_p4	Mediterranean	Acetate	915.693	CRC	773.186	4
di_p4	Mediterranean	Formate	660.7	CRC	496.774	4
di_p4	Mediterranean	Butyrate	603.688	CRC	115.103	4
di_p4	Mediterranean	Indole	-585.934	CRC	-143.69	4
di_p4	Mediterranean	Succinate	463.109	CRC	41.1506	4
di_p4	Mediterranean	Trimethylamine	4.85738	CRC	215.621	4
di_p4	Mediterranean	Putrescine	-0.0129817	CRC	-0.0179431	4
di_p4	Mediterranean	Hydrogen Sulfide	-0.00403142	CRC	1.13583	4
di_p4	Mediterranean	Propionate	0	CRC	0	4
di_p4	Mediterranean	Valerate	0	CRC	0	4
di_p4	Mediterranean	Lactate	0	CRC	0	4
di_p4	Mediterranean	Phenol	0	CRC	0	4
di_p4	Vegan	Ammonia	931.483	CRC	736.584	4
di_p4	Vegan	Butyrate	634.029	CRC	142.61	4
di_p4	Vegan	Indole	-454.72	CRC	-125.309	4
di_p4	Vegan	Acetate	248.646	CRC	638.555	4
di_p4	Vegan	Succinate	231.305	CRC	593.779	4
di_p4	Vegan	Formate	-120.946	CRC	286.501	4
di_p4	Vegan	Trimethylamine	4.92714	CRC	250.562	4
di_p4	Vegan	Hydrogen Sulfide	0.0308668	CRC	0.674618	4
di_p4	Vegan	Putrescine	-0.0130884	CRC	0.596456	4
di_p4	Vegan	Propionate	0	CRC	0	4
di_p4	Vegan	Valerate	0	CRC	0	4
di_p4	Vegan	Lactate	0	CRC	0	4
di_p4	Vegan	Phenol	0	CRC	0	4
di_p5	Gluten_Free	Ammonia	625.945	CRC	710.913	5
di_p5	Gluten_Free	Succinate	453.05	CRC	558.682	5
di_p5	Gluten_Free	Acetate	357.47	CRC	530.276	5
di_p5	Gluten_Free	Formate	145.26	CRC	301.257	5
di_p5	Gluten_Free	Butyrate	66.7873	CRC	119.344	5
di_p5	Gluten_Free	Indole	-25.0101	CRC	-60.468	5
di_p5	Gluten_Free	Hydrogen Sulfide	10.0395	CRC	11.5365	5
di_p5	Gluten_Free	Putrescine	-0.0183863	CRC	-0.0142275	5
di_p5	Gluten_Free	Trimethylamine	-9.85019e-160	CRC	217.576	5
di_p5	Gluten_Free	Propionate	0	CRC	0	5
di_p5	Gluten_Free	Valerate	0	CRC	0	5
di_p5	Gluten_Free	Lactate	0	CRC	0	5
di_p5	Gluten_Free	Phenol	0	CRC	0	5
di_p5	High_Fiber	Acetate	973.582	CRC	949.481	5
di_p5	High_Fiber	Ammonia	790.086	CRC	767.774	5
di_p5	High_Fiber	Succinate	392.153	CRC	252.852	5
di_p5	High_Fiber	Formate	233.72	CRC	409.199	5
di_p5	High_Fiber	Butyrate	146.043	CRC	148.38	5
di_p5	High_Fiber	Indole	1.44851	CRC	1.36363	5
di_p5	High_Fiber	Hydrogen Sulfide	1.3837	CRC	1.2075	5
di_p5	High_Fiber	Putrescine	-0.0359841	CRC	-0.029809	5
di_p5	High_Fiber	Trimethylamine	-2.19554e-192	CRC	12.5916	5
di_p5	High_Fiber	Propionate	0	CRC	0	5
di_p5	High_Fiber	Valerate	0	CRC	0	5
di_p5	High_Fiber	Lactate	0	CRC	0	5
di_p5	High_Fiber	Phenol	0	CRC	0	5
di_p5	High_fat	Acetate	847.687	CRC	725.37	5
di_p5	High_fat	Ammonia	821.396	CRC	572.431	5
di_p5	High_fat	Succinate	531.543	CRC	545.285	5
di_p5	High_fat	Formate	450.55	CRC	432.101	5
di_p5	High_fat	Butyrate	65.9382	CRC	117.143	5
di_p5	High_fat	Indole	-55.5806	CRC	-113.997	5
di_p5	High_fat	Hydrogen Sulfide	0.604386	CRC	-3.58459	5
di_p5	High_fat	Putrescine	-0.00637656	CRC	-0.154578	5
di_p5	High_fat	Trimethylamine	-8.11182e-73	CRC	0.251808	5
di_p5	High_fat	Propionate	0	CRC	0	5
di_p5	High_fat	Valerate	0	CRC	0	5
di_p5	High_fat	Lactate	0	CRC	0	5
di_p5	High_fat	Phenol	0	CRC	0	5
di_p5	High_protein	Ammonia	938.593	CRC	767.19	5
di_p5	High_protein	Succinate	524.23	CRC	589.106	5
di_p5	High_protein	Acetate	490.705	CRC	631.978	5
di_p5	High_protein	Formate	401.378	CRC	583.15	5
di_p5	High_protein	Butyrate	68.1015	CRC	117.263	5
di_p5	High_protein	Indole	-58.2418	CRC	-120.004	5
di_p5	High_protein	Hydrogen Sulfide	0.0826738	CRC	1.10394	5
di_p5	High_protein	Putrescine	-0.0114998	CRC	0.143971	5
di_p5	High_protein	Trimethylamine	-6.86918e-157	CRC	213.247	5
di_p5	High_protein	Propionate	0	CRC	0	5
di_p5	High_protein	Valerate	0	CRC	0	5
di_p5	High_protein	Lactate	0	CRC	0	5
di_p5	High_protein	Phenol	0	CRC	0	5
di_p5	Mediterranean	Ammonia	893.171	CRC	668.537	5
di_p5	Mediterranean	Acetate	614.462	CRC	773.186	5
di_p5	Mediterranean	Succinate	488.76	CRC	41.1506	5
di_p5	Mediterranean	Indole	-228.204	CRC	-143.69	5
di_p5	Mediterranean	Formate	152.201	CRC	496.774	5
di_p5	Mediterranean	Butyrate	65.5657	CRC	115.103	5
di_p5	Mediterranean	Putrescine	-0.0231946	CRC	-0.0179431	5
di_p5	Mediterranean	Hydrogen Sulfide	1.41763e-23	CRC	1.13583	5
di_p5	Mediterranean	Trimethylamine	-6.2216e-202	CRC	215.621	5
di_p5	Mediterranean	Propionate	0	CRC	0	5
di_p5	Mediterranean	Valerate	0	CRC	0	5
di_p5	Mediterranean	Lactate	0	CRC	0	5
di_p5	Mediterranean	Phenol	0	CRC	0	5
di_p5	Vegan	Ammonia	861.916	CRC	736.584	5
di_p5	Vegan	Succinate	507.164	CRC	593.779	5
di_p5	Vegan	Acetate	383.875	CRC	638.555	5
di_p5	Vegan	Indole	-222.64	CRC	-125.309	5
di_p5	Vegan	Formate	164.83	CRC	286.501	5
di_p5	Vegan	Butyrate	73.588	CRC	142.61	5
di_p5	Vegan	Hydrogen Sulfide	0.0996427	CRC	0.674618	5
di_p5	Vegan	Putrescine	-0.0262199	CRC	0.596456	5
di_p5	Vegan	Trimethylamine	-1.10994e-177	CRC	250.562	5
di_p5	Vegan	Propionate	0	CRC	0	5
di_p5	Vegan	Valerate	0	CRC	0	5
di_p5	Vegan	Lactate	0	CRC	0	5
di_p5	Vegan	Phenol	0	CRC	0	5
di_p6	Gluten_Free	Ammonia	908.736	CRC	710.913	6
di_p6	Gluten_Free	Acetate	773.211	CRC	530.276	6
di_p6	Gluten_Free	Succinate	537.076	CRC	558.682	6
di_p6	Gluten_Free	Trimethylamine	60.3358	CRC	217.576	6
di_p6	Gluten_Free	Butyrate	46.3011	CRC	119.344	6
di_p6	Gluten_Free	Formate	22.6335	CRC	301.257	6
di_p6	Gluten_Free	Indole	-20.8848	CRC	-60.468	6
di_p6	Gluten_Free	Hydrogen Sulfide	5.109	CRC	11.5365	6
di_p6	Gluten_Free	Putrescine	-0.0137728	CRC	-0.0142275	6
di_p6	Gluten_Free	Propionate	0	CRC	0	6
di_p6	Gluten_Free	Valerate	0	CRC	0	6
di_p6	Gluten_Free	Lactate	0	CRC	0	6
di_p6	Gluten_Free	Phenol	0	CRC	0	6
di_p6	High_Fiber	Acetate	982.92	CRC	949.481	6
di_p6	High_Fiber	Ammonia	782.127	CRC	767.774	6
di_p6	High_Fiber	Succinate	510.501	CRC	252.852	6
di_p6	High_Fiber	Formate	464.463	CRC	409.199	6
di_p6	High_Fiber	Butyrate	37.677	CRC	148.38	6
di_p6	High_Fiber	Trimethylamine	7.14766	CRC	12.5916	6
di_p6	High_Fiber	Hydrogen Sulfide	3.69504	CRC	1.2075	6
di_p6	High_Fiber	Indole	2.06744	CRC	1.36363	6
di_p6	High_Fiber	Putrescine	-0.0350259	CRC	-0.029809	6
di_p6	High_Fiber	Propionate	0	CRC	0	6
di_p6	High_Fiber	Valerate	0	CRC	0	6
di_p6	High_Fiber	Lactate	0	CRC	0	6
di_p6	High_Fiber	Phenol	0	CRC	0	6
di_p6	High_fat	Succinate	634.679	CRC	545.285	6
di_p6	High_fat	Acetate	606.375	CRC	725.37	6
di_p6	High_fat	Ammonia	422.579	CRC	572.431	6
di_p6	High_fat	Formate	323.924	CRC	432.101	6
di_p6	High_fat	Hydrogen Sulfide	-56.8538	CRC	-3.58459	6
di_p6	High_fat	Butyrate	30.566	CRC	117.143	6
di_p6	High_fat	Indole	-24.8571	CRC	-113.997	6
di_p6	High_fat	Trimethylamine	-4.27144	CRC	0.251808	6
di_p6	High_fat	Putrescine	-0.0336692	CRC	-0.154578	6
di_p6	High_fat	Propionate	0	CRC	0	6
di_p6	High_fat	Valerate	0	CRC	0	6
di_p6	High_fat	Lactate	0	CRC	0	6
di_p6	High_fat	Phenol	0	CRC	0	6
di_p6	High_protein	Ammonia	743.989	CRC	767.19	6
di_p6	High_protein	Acetate	604.297	CRC	631.978	6
di_p6	High_protein	Succinate	546.483	CRC	589.106	6
di_p6	High_protein	Formate	337.89	CRC	583.15	6
di_p6	High_protein	Trimethylamine	62.3566	CRC	213.247	6
di_p6	High_protein	Indole	-38.6565	CRC	-120.004	6
di_p6	High_protein	Butyrate	35.1791	CRC	117.263	6
di_p6	High_protein	Hydrogen Sulfide	19.4963	CRC	1.10394	6
di_p6	High_protein	Putrescine	-0.0136544	CRC	0.143971	6
di_p6	High_protein	Propionate	0	CRC	0	6
di_p6	High_protein	Valerate	0	CRC	0	6
di_p6	High_protein	Lactate	0	CRC	0	6
di_p6	High_protein	Phenol	0	CRC	0	6
di_p6	Mediterranean	Acetate	655.139	CRC	773.186	6
di_p6	Mediterranean	Ammonia	470.547	CRC	668.537	6
di_p6	Mediterranean	Succinate	444.684	CRC	41.1506	6
di_p6	Mediterranean	Formate	358.394	CRC	496.774	6
di_p6	Mediterranean	Trimethylamine	57.1435	CRC	215.621	6
di_p6	Mediterranean	Indole	-46.7865	CRC	-143.69	6
di_p6	Mediterranean	Butyrate	31.6161	CRC	115.103	6
di_p6	Mediterranean	Hydrogen Sulfide	22.0257	CRC	1.13583	6
di_p6	Mediterranean	Putrescine	-0.0174544	CRC	-0.0179431	6
di_p6	Mediterranean	Propionate	0	CRC	0	6
di_p6	Mediterranean	Valerate	0	CRC	0	6
di_p6	Mediterranean	Lactate	0	CRC	0	6
di_p6	Mediterranean	Phenol	0	CRC	0	6
di_p6	Vegan	Ammonia	897.967	CRC	736.584	6
di_p6	Vegan	Acetate	823.34	CRC	638.555	6
di_p6	Vegan	Succinate	662.942	CRC	593.779	6
di_p6	Vegan	Formate	153.088	CRC	286.501	6
di_p6	Vegan	Trimethylamine	82.3112	CRC	250.562	6
di_p6	Vegan	Butyrate	47.546	CRC	142.61	6
di_p6	Vegan	Indole	-38.8753	CRC	-125.309	6
di_p6	Vegan	Hydrogen Sulfide	11.9022	CRC	0.674618	6
di_p6	Vegan	Putrescine	-0.0524208	CRC	0.596456	6
di_p6	Vegan	Propionate	0	CRC	0	6
di_p6	Vegan	Valerate	0	CRC	0	6
di_p6	Vegan	Lactate	0	CRC	0	6
di_p6	Vegan	Phenol	0	CRC	0	6
di_p7	Gluten_Free	Acetate	949.604	CRC	530.276	7
di_p7	Gluten_Free	Ammonia	935.341	CRC	710.913	7
di_p7	Gluten_Free	Formate	735.56	CRC	301.257	7
di_p7	Gluten_Free	Butyrate	719.606	CRC	119.344	7
di_p7	Gluten_Free	Succinate	308.131	CRC	558.682	7
di_p7	Gluten_Free	Indole	-290.339	CRC	-60.468	7
di_p7	Gluten_Free	Trimethylamine	17.3279	CRC	217.576	7
di_p7	Gluten_Free	Hydrogen Sulfide	5.01628	CRC	11.5365	7
di_p7	Gluten_Free	Putrescine	-0.00858378	CRC	-0.0142275	7
di_p7	Gluten_Free	Propionate	0	CRC	0	7
di_p7	Gluten_Free	Valerate	0	CRC	0	7
di_p7	Gluten_Free	Lactate	0	CRC	0	7
di_p7	Gluten_Free	Phenol	0	CRC	0	7
di_p7	High_Fiber	Acetate	971.829	CRC	949.481	7
di_p7	High_Fiber	Ammonia	945.824	CRC	767.774	7
di_p7	High_Fiber	Succinate	798.004	CRC	252.852	7
di_p7	High_Fiber	Formate	779.382	CRC	409.199	7
di_p7	High_Fiber	Butyrate	736.121	CRC	148.38	7
di_p7	High_Fiber	Indole	4.17807	CRC	1.36363	7
di_p7	High_Fiber	Trimethylamine	2.12495	CRC	12.5916	7
di_p7	High_Fiber	Hydrogen Sulfide	0.324598	CRC	1.2075	7
di_p7	High_Fiber	Putrescine	-0.0117012	CRC	-0.029809	7
di_p7	High_Fiber	Propionate	0	CRC	0	7
di_p7	High_Fiber	Valerate	0	CRC	0	7
di_p7	High_Fiber	Lactate	0	CRC	0	7
di_p7	High_Fiber	Phenol	0	CRC	0	7
di_p7	High_fat	Acetate	972.179	CRC	725.37	7
di_p7	High_fat	Ammonia	886.982	CRC	572.431	7
di_p7	High_fat	Formate	723.596	CRC	432.101	7
di_p7	High_fat	Butyrate	710.605	CRC	117.143	7
di_p7	High_fat	Indole	-637.563	CRC	-113.997	7
di_p7	High_fat	Succinate	621.04	CRC	545.285	7
di_p7	High_fat	Trimethylamine	0.967746	CRC	0.251808	7
di_p7	High_fat	Hydrogen Sulfide	-0.25719	CRC	-3.58459	7
di_p7	High_fat	Putrescine	-0.00431063	CRC	-0.154578	7
di_p7	High_fat	Propionate	0	CRC	0	7
di_p7	High_fat	Valerate	0	CRC	0	7
di_p7	High_fat	Lactate	0	CRC	0	7
di_p7	High_fat	Phenol	0	CRC	0	7
di_p7	High_protein	Acetate	957.393	CRC	631.978	7
di_p7	High_protein	Ammonia	936.459	CRC	767.19	7
di_p7	High_protein	Formate	780.583	CRC	583.15	7
di_p7	High_protein	Butyrate	701.712	CRC	117.263	7
di_p7	High_protein	Indole	-647.07	CRC	-120.004	7
di_p7	High_protein	Succinate	501.247	CRC	589.106	7
di_p7	High_protein	Trimethylamine	17.9754	CRC	213.247	7
di_p7	High_protein	Hydrogen Sulfide	0.0333715	CRC	1.10394	7
di_p7	High_protein	Putrescine	-0.0088335	CRC	0.143971	7
di_p7	High_protein	Propionate	0	CRC	0	7
di_p7	High_protein	Valerate	0	CRC	0	7
di_p7	High_protein	Lactate	0	CRC	0	7
di_p7	High_protein	Phenol	0	CRC	0	7
di_p7	Mediterranean	Acetate	974.521	CRC	773.186	7
di_p7	Mediterranean	Ammonia	928.921	CRC	668.537	7
di_p7	Mediterranean	Formate	756.118	CRC	496.774	7
di_p7	Mediterranean	Butyrate	695.443	CRC	115.103	7
di_p7	Mediterranean	Indole	-641.744	CRC	-143.69	7
di_p7	Mediterranean	Succinate	439.345	CRC	41.1506	7
di_p7	Mediterranean	Trimethylamine	16.4122	CRC	215.621	7
di_p7	Mediterranean	Putrescine	-0.0108286	CRC	-0.0179431	7
di_p7	Mediterranean	Hydrogen Sulfide	-0.00772401	CRC	1.13583	7
di_p7	Mediterranean	Propionate	0	CRC	0	7
di_p7	Mediterranean	Valerate	0	CRC	0	7
di_p7	Mediterranean	Lactate	0	CRC	0	7
di_p7	Mediterranean	Phenol	0	CRC	0	7
di_p7	Vegan	Ammonia	942.444	CRC	736.584	7
di_p7	Vegan	Butyrate	736.58	CRC	142.61	7
di_p7	Vegan	Indole	-490.123	CRC	-125.309	7
di_p7	Vegan	Acetate	240.653	CRC	638.555	7
di_p7	Vegan	Succinate	192.431	CRC	593.779	7
di_p7	Vegan	Formate	-171.825	CRC	286.501	7
di_p7	Vegan	Trimethylamine	16.7621	CRC	250.562	7
di_p7	Vegan	Hydrogen Sulfide	0.0396876	CRC	0.674618	7
di_p7	Vegan	Putrescine	-0.0118693	CRC	0.596456	7
di_p7	Vegan	Propionate	0	CRC	0	7
di_p7	Vegan	Valerate	0	CRC	0	7
di_p7	Vegan	Lactate	0	CRC	0	7
di_p7	Vegan	Phenol	0	CRC	0	7
di_p8	Gluten_Free	Acetate	942.418	CRC	530.276	8
di_p8	Gluten_Free	Ammonia	893.95	CRC	710.913	8
di_p8	Gluten_Free	Formate	658.783	CRC	301.257	8
di_p8	Gluten_Free	Butyrate	620.719	CRC	119.344	8
di_p8	Gluten_Free	Succinate	300.233	CRC	558.682	8
di_p8	Gluten_Free	Indole	-275.994	CRC	-60.468	8
di_p8	Gluten_Free	Trimethylamine	6.64452	CRC	217.576	8
di_p8	Gluten_Free	Hydrogen Sulfide	2.77731	CRC	11.5365	8
di_p8	Gluten_Free	Putrescine	-0.0127822	CRC	-0.0142275	8
di_p8	Gluten_Free	Propionate	0	CRC	0	8
di_p8	Gluten_Free	Valerate	0	CRC	0	8
di_p8	Gluten_Free	Lactate	0	CRC	0	8
di_p8	Gluten_Free	Phenol	0	CRC	0	8
di_p8	High_Fiber	Acetate	976.88	CRC	949.481	8
di_p8	High_Fiber	Ammonia	937.21	CRC	767.774	8
di_p8	High_Fiber	Succinate	749.784	CRC	252.852	8
di_p8	High_Fiber	Formate	715.303	CRC	409.199	8
di_p8	High_Fiber	Butyrate	665.053	CRC	148.38	8
di_p8	High_Fiber	Indole	3.77678	CRC	1.36363	8
di_p8	High_Fiber	Hydrogen Sulfide	0.298333	CRC	1.2075	8
di_p8	High_Fiber	Putrescine	-0.0155097	CRC	-0.029809	8
di_p8	High_Fiber	Trimethylamine	-3.02851e-192	CRC	12.5916	8
di_p8	High_Fiber	Propionate	0	CRC	0	8
di_p8	High_Fiber	Valerate	0	CRC	0	8
di_p8	High_Fiber	Lactate	0	CRC	0	8
di_p8	High_Fiber	Phenol	0	CRC	0	8
di_p8	High_fat	Acetate	950.645	CRC	725.37	8
di_p8	High_fat	Ammonia	868.688	CRC	572.431	8
di_p8	High_fat	Formate	624.897	CRC	432.101	8
di_p8	High_fat	Succinate	624.341	CRC	545.285	8
di_p8	High_fat	Butyrate	612.448	CRC	117.143	8
di_p8	High_fat	Indole	-571.729	CRC	-113.997	8
di_p8	High_fat	Hydrogen Sulfide	-1.60176	CRC	-3.58459	8
di_p8	High_fat	Putrescine	-0.00618022	CRC	-0.154578	8
di_p8	High_fat	Trimethylamine	-2.27639e-72	CRC	0.251808	8
di_p8	High_fat	Propionate	0	CRC	0	8
di_p8	High_fat	Valerate	0	CRC	0	8
di_p8	High_fat	Lactate	0	CRC	0	8
di_p8	High_fat	Phenol	0	CRC	0	8
di_p8	High_protein	Acetate	943.184	CRC	631.978	8
di_p8	High_protein	Ammonia	863.497	CRC	767.19	8
di_p8	High_protein	Formate	689.246	CRC	583.15	8
di_p8	High_protein	Butyrate	603.737	CRC	117.263	8
di_p8	High_protein	Indole	-583.465	CRC	-120.004	8
di_p8	High_protein	Succinate	481.496	CRC	589.106	8
di_p8	High_protein	Trimethylamine	6.43633	CRC	213.247	8
di_p8	High_protein	Hydrogen Sulfide	0.635037	CRC	1.10394	8
di_p8	High_protein	Putrescine	-0.0124343	CRC	0.143971	8
di_p8	High_protein	Propionate	0	CRC	0	8
di_p8	High_protein	Valerate	0	CRC	0	8
di_p8	High_protein	Lactate	0	CRC	0	8
di_p8	High_protein	Phenol	0	CRC	0	8
di_p8	Mediterranean	Acetate	957.442	CRC	773.186	8
di_p8	Mediterranean	Ammonia	915.979	CRC	668.537	8
di_p8	Mediterranean	Formate	670.609	CRC	496.774	8
di_p8	Mediterranean	Butyrate	599.037	CRC	115.103	8
di_p8	Mediterranean	Indole	-581.635	CRC	-143.69	8
di_p8	Mediterranean	Succinate	418.579	CRC	41.1506	8
di_p8	Mediterranean	Trimethylamine	6.64452	CRC	215.621	8
di_p8	Mediterranean	Hydrogen Sulfide	0.69123	CRC	1.13583	8
di_p8	Mediterranean	Putrescine	-0.0161249	CRC	-0.0179431	8
di_p8	Mediterranean	Propionate	0	CRC	0	8
di_p8	Mediterranean	Valerate	0	CRC	0	8
di_p8	Mediterranean	Lactate	0	CRC	0	8
di_p8	Mediterranean	Phenol	0	CRC	0	8
di_p8	Vegan	Ammonia	914.881	CRC	736.584	8
di_p8	Vegan	Butyrate	644.648	CRC	142.61	8
di_p8	Vegan	Indole	-432.739	CRC	-125.309	8
di_p8	Vegan	Acetate	317.118	CRC	638.555	8
di_p8	Vegan	Succinate	207.428	CRC	593.779	8
di_p8	Vegan	Formate	-137.606	CRC	286.501	8
di_p8	Vegan	Trimethylamine	6.90587	CRC	250.562	8
di_p8	Vegan	Hydrogen Sulfide	0.325811	CRC	0.674618	8
di_p8	Vegan	Putrescine	-0.0154065	CRC	0.596456	8
di_p8	Vegan	Propionate	0	CRC	0	8
di_p8	Vegan	Valerate	0	CRC	0	8
di_p8	Vegan	Lactate	0	CRC	0	8
di_p8	Vegan	Phenol	0	CRC	0	8
di_p9	Gluten_Free	Acetate	924.043	CRC	530.276	9
di_p9	Gluten_Free	Ammonia	853.303	CRC	710.913	9
di_p9	Gluten_Free	Succinate	423.632	CRC	558.682	9
di_p9	Gluten_Free	Formate	173.849	CRC	301.257	9
di_p9	Gluten_Free	Butyrate	153.769	CRC	119.344	9
di_p9	Gluten_Free	Indole	-75.9732	CRC	-60.468	9
di_p9	Gluten_Free	Hydrogen Sulfide	20.3102	CRC	11.5365	9
di_p9	Gluten_Free	Trimethylamine	13.2693	CRC	217.576	9
di_p9	Gluten_Free	Putrescine	-0.0237154	CRC	-0.0142275	9
di_p9	Gluten_Free	Propionate	0	CRC	0	9
di_p9	Gluten_Free	Valerate	0	CRC	0	9
di_p9	Gluten_Free	Lactate	0	CRC	0	9
di_p9	Gluten_Free	Phenol	0	CRC	0	9
di_p9	High_Fiber	Acetate	985.042	CRC	949.481	9
di_p9	High_Fiber	Ammonia	852.2	CRC	767.774	9
di_p9	High_Fiber	Succinate	477.954	CRC	252.852	9
di_p9	High_Fiber	Formate	411.603	CRC	409.199	9
di_p9	High_Fiber	Butyrate	161.501	CRC	148.38	9
di_p9	High_Fiber	Trimethylamine	3.35082	CRC	12.5916	9
di_p9	High_Fiber	Hydrogen Sulfide	2.12694	CRC	1.2075	9
di_p9	High_Fiber	Indole	1.86473	CRC	1.36363	9
di_p9	High_Fiber	Putrescine	-0.0377083	CRC	-0.029809	9
di_p9	High_Fiber	Propionate	0	CRC	0	9
di_p9	High_Fiber	Valerate	0	CRC	0	9
di_p9	High_Fiber	Lactate	0	CRC	0	9
di_p9	High_Fiber	Phenol	0	CRC	0	9
di_p9	High_fat	Acetate	912.958	CRC	725.37	9
di_p9	High_fat	Succinate	729.074	CRC	545.285	9
di_p9	High_fat	Ammonia	626.757	CRC	572.431	9
di_p9	High_fat	Formate	175.439	CRC	432.101	9
di_p9	High_fat	Butyrate	148.836	CRC	117.143	9
di_p9	High_fat	Indole	-141.198	CRC	-113.997	9
di_p9	High_fat	Hydrogen Sulfide	-12.2382	CRC	-3.58459	9
di_p9	High_fat	Trimethylamine	-2.57032	CRC	0.251808	9
di_p9	High_fat	Putrescine	-0.0334409	CRC	-0.154578	9
di_p9	High_fat	Propionate	0	CRC	0	9
di_p9	High_fat	Valerate	0	CRC	0	9
di_p9	High_fat	Lactate	0	CRC	0	9
di_p9	High_fat	Phenol	0	CRC	0	9
di_p9	High_protein	Acetate	884.405	CRC	631.978	9
di_p9	High_protein	Ammonia	817.686	CRC	767.19	9
di_p9	High_protein	Succinate	468.042	CRC	589.106	9
di_p9	High_protein	Formate	318.93	CRC	583.15	9
di_p9	High_protein	Indole	-151.588	CRC	-120.004	9
di_p9	High_protein	Butyrate	148.336	CRC	117.263	9
di_p9	High_protein	Trimethylamine	14.2397	CRC	213.247	9
di_p9	High_protein	Hydrogen Sulfide	4.65457	CRC	1.10394	9
di_p9	High_protein	Putrescine	-0.0233482	CRC	0.143971	9
di_p9	High_protein	Propionate	0	CRC	0	9
di_p9	High_protein	Valerate	0	CRC	0	9
di_p9	High_protein	Lactate	0	CRC	0	9
di_p9	High_protein	Phenol	0	CRC	0	9
di_p9	Mediterranean	Acetate	908.352	CRC	773.186	9
di_p9	Mediterranean	Ammonia	731.467	CRC	668.537	9
di_p9	Mediterranean	Succinate	367.851	CRC	41.1506	9
di_p9	Mediterranean	Formate	265.877	CRC	496.774	9
di_p9	Mediterranean	Indole	-155.277	CRC	-143.69	9
di_p9	Mediterranean	Butyrate	145.79	CRC	115.103	9
di_p9	Mediterranean	Trimethylamine	12.1115	CRC	215.621	9
di_p9	Mediterranean	Hydrogen Sulfide	5.08059	CRC	1.13583	9
di_p9	Mediterranean	Putrescine	-0.0302139	CRC	-0.0179431	9
di_p9	Mediterranean	Propionate	0	CRC	0	9
di_p9	Mediterranean	Valerate	0	CRC	0	9
di_p9	Mediterranean	Lactate	0	CRC	0	9
di_p9	Mediterranean	Phenol	0	CRC	0	9
di_p9	Vegan	Ammonia	856.361	CRC	736.584	9
di_p9	Vegan	Acetate	783.365	CRC	638.555	9
di_p9	Vegan	Succinate	409.285	CRC	593.779	9
di_p9	Vegan	Butyrate	161.305	CRC	142.61	9
di_p9	Vegan	Indole	-111.449	CRC	-125.309	9
di_p9	Vegan	Formate	51.7009	CRC	286.501	9
di_p9	Vegan	Trimethylamine	16.777	CRC	250.562	9
di_p9	Vegan	Hydrogen Sulfide	2.46748	CRC	0.674618	9
di_p9	Vegan	Putrescine	-0.0425198	CRC	0.596456	9
di_p9	Vegan	Propionate	0	CRC	0	9
di_p9	Vegan	Valerate	0	CRC	0	9
di_p9	Vegan	Lactate	0	CRC	0	9
di_p9	Vegan	Phenol	0	CRC	0	9
di_p10	Gluten_Free	Acetate	934.304	CRC	530.276	10
di_p10	Gluten_Free	Ammonia	880.713	CRC	710.913	10
di_p10	Gluten_Free	Formate	630.46	CRC	301.257	10
di_p10	Gluten_Free	Butyrate	587.703	CRC	119.344	10
di_p10	Gluten_Free	Succinate	304.554	CRC	558.682	10
di_p10	Gluten_Free	Indole	-268.584	CRC	-60.468	10
di_p10	Gluten_Free	Trimethylamine	6.51414	CRC	217.576	10
di_p10	Gluten_Free	Hydrogen Sulfide	5.52869	CRC	11.5365	10
di_p10	Gluten_Free	Putrescine	-0.0137224	CRC	-0.0142275	10
di_p10	Gluten_Free	Propionate	0	CRC	0	10
di_p10	Gluten_Free	Valerate	0	CRC	0	10
di_p10	Gluten_Free	Lactate	0	CRC	0	10
di_p10	Gluten_Free	Phenol	0	CRC	0	10
di_p10	High_Fiber	Acetate	977.649	CRC	949.481	10
di_p10	High_Fiber	Ammonia	935.879	CRC	767.774	10
di_p10	High_Fiber	Succinate	731.406	CRC	252.852	10
di_p10	High_Fiber	Formate	694.571	CRC	409.199	10
di_p10	High_Fiber	Butyrate	638.576	CRC	148.38	10
di_p10	High_Fiber	Indole	3.65997	CRC	1.36363	10
di_p10	High_Fiber	Hydrogen Sulfide	0.380405	CRC	1.2075	10
di_p10	High_Fiber	Putrescine	-0.01674	CRC	-0.029809	10
di_p10	High_Fiber	Trimethylamine	-3.14271e-192	CRC	12.5916	10
di_p10	High_Fiber	Propionate	0	CRC	0	10
di_p10	High_Fiber	Valerate	0	CRC	0	10
di_p10	High_Fiber	Lactate	0	CRC	0	10
di_p10	High_Fiber	Phenol	0	CRC	0	10
di_p10	High_fat	Acetate	942.457	CRC	725.37	10
di_p10	High_fat	Ammonia	854.941	CRC	572.431	10
di_p10	High_fat	Succinate	624.843	CRC	545.285	10
di_p10	High_fat	Formate	593.735	CRC	432.101	10
di_p10	High_fat	Butyrate	580.356	CRC	117.143	10
di_p10	High_fat	Indole	-547.662	CRC	-113.997	10
di_p10	High_fat	Hydrogen Sulfide	0.327841	CRC	-3.58459	10
di_p10	High_fat	Putrescine	-0.00667975	CRC	-0.154578	10
di_p10	High_fat	Trimethylamine	-2.3311e-72	CRC	0.251808	10
di_p10	High_fat	Propionate	0	CRC	0	10
di_p10	High_fat	Valerate	0	CRC	0	10
di_p10	High_fat	Lactate	0	CRC	0	10
di_p10	High_fat	Phenol	0	CRC	0	10
di_p10	High_protein	Acetate	934.552	CRC	631.978	10
di_p10	High_protein	Ammonia	845.173	CRC	767.19	10
di_p10	High_protein	Formate	663.382	CRC	583.15	10
di_p10	High_protein	Butyrate	572.06	CRC	117.263	10
di_p10	High_protein	Indole	-559.954	CRC	-120.004	10
di_p10	High_protein	Succinate	480.935	CRC	589.106	10
di_p10	High_protein	Trimethylamine	6.31004	CRC	213.247	10
di_p10	High_protein	Hydrogen Sulfide	0.0334136	CRC	1.10394	10
di_p10	High_protein	Putrescine	-0.0133948	CRC	0.143971	10
di_p10	High_protein	Propionate	0	CRC	0	10
di_p10	High_protein	Valerate	0	CRC	0	10
di_p10	High_protein	Lactate	0	CRC	0	10
di_p10	High_protein	Phenol	0	CRC	0	10
di_p10	Mediterranean	Acetate	950.178	CRC	773.186	10
di_p10	Mediterranean	Ammonia	907.633	CRC	668.537	10
di_p10	Mediterranean	Formate	644.295	CRC	496.774	10
di_p10	Mediterranean	Butyrate	567.616	CRC	115.103	10
di_p10	Mediterranean	Indole	-559.406	CRC	-143.69	10
di_p10	Mediterranean	Succinate	409.732	CRC	41.1506	10
di_p10	Mediterranean	Trimethylamine	6.51414	CRC	215.621	10
di_p10	Mediterranean	Putrescine	-0.017311	CRC	-0.0179431	10
di_p10	Mediterranean	Hydrogen Sulfide	-0.0156878	CRC	1.13583	10
di_p10	Mediterranean	Propionate	0	CRC	0	10
di_p10	Mediterranean	Valerate	0	CRC	0	10
di_p10	Mediterranean	Lactate	0	CRC	0	10
di_p10	Mediterranean	Phenol	0	CRC	0	10
di_p10	Vegan	Ammonia	905.953	CRC	736.584	10
di_p10	Vegan	Butyrate	614.554	CRC	142.61	10
di_p10	Vegan	Indole	-413.79	CRC	-125.309	10
di_p10	Vegan	Acetate	340.644	CRC	638.555	10
di_p10	Vegan	Succinate	217.063	CRC	593.779	10
di_p10	Vegan	Formate	-127.019	CRC	286.501	10
di_p10	Vegan	Trimethylamine	6.81176	CRC	250.562	10
di_p10	Vegan	Hydrogen Sulfide	0.0408037	CRC	0.674618	10
di_p10	Vegan	Putrescine	-0.0168321	CRC	0.596456	10
di_p10	Vegan	Propionate	0	CRC	0	10
di_p10	Vegan	Valerate	0	CRC	0	10
di_p10	Vegan	Lactate	0	CRC	0	10
di_p10	Vegan	Phenol	0	CRC	0	10
di_p11	Gluten_Free	Acetate	964.016	CRC	530.276	11
di_p11	Gluten_Free	Ammonia	938.54	CRC	710.913	11
di_p11	Gluten_Free	Formate	752.045	CRC	301.257	11
di_p11	Gluten_Free	Butyrate	744.327	CRC	119.344	11
di_p11	Gluten_Free	Indole	-298.779	CRC	-60.468	11
di_p11	Gluten_Free	Succinate	292.877	CRC	558.682	11
di_p11	Gluten_Free	Trimethylamine	7.98833	CRC	217.576	11
di_p11	Gluten_Free	Hydrogen Sulfide	3.03319	CRC	11.5365	11
di_p11	Gluten_Free	Putrescine	-0.00845588	CRC	-0.0142275	11
di_p11	Gluten_Free	Propionate	0	CRC	0	11
di_p11	Gluten_Free	Valerate	0	CRC	0	11
di_p11	Gluten_Free	Lactate	0	CRC	0	11
di_p11	Gluten_Free	Phenol	0	CRC	0	11
di_p11	High_Fiber	Acetate	972.302	CRC	949.481	11
di_p11	High_Fiber	Ammonia	946.203	CRC	767.774	11
di_p11	High_Fiber	Succinate	813.05	CRC	252.852	11
di_p11	High_Fiber	Formate	782.184	CRC	409.199	11
di_p11	High_Fiber	Butyrate	757.694	CRC	148.38	11
di_p11	High_Fiber	Indole	4.23103	CRC	1.36363	11
di_p11	High_Fiber	Trimethylamine	1.24866	CRC	12.5916	11
di_p11	High_Fiber	Hydrogen Sulfide	0.195431	CRC	1.2075	11
di_p11	High_Fiber	Putrescine	-0.0107471	CRC	-0.029809	11
di_p11	High_Fiber	Propionate	0	CRC	0	11
di_p11	High_Fiber	Valerate	0	CRC	0	11
di_p11	High_Fiber	Lactate	0	CRC	0	11
di_p11	High_Fiber	Phenol	0	CRC	0	11
di_p11	High_fat	Acetate	974.457	CRC	725.37	11
di_p11	High_fat	Ammonia	898.405	CRC	572.431	11
di_p11	High_fat	Formate	736.682	CRC	432.101	11
di_p11	High_fat	Butyrate	735.022	CRC	117.143	11
di_p11	High_fat	Indole	-658.472	CRC	-113.997	11
di_p11	High_fat	Succinate	620.417	CRC	545.285	11
di_p11	High_fat	Trimethylamine	0.571414	CRC	0.251808	11
di_p11	High_fat	Hydrogen Sulfide	-0.148224	CRC	-3.58459	11
di_p11	High_fat	Putrescine	-0.00409356	CRC	-0.154578	11
di_p11	High_fat	Propionate	0	CRC	0	11
di_p11	High_fat	Valerate	0	CRC	0	11
di_p11	High_fat	Lactate	0	CRC	0	11
di_p11	High_fat	Phenol	0	CRC	0	11
di_p11	High_protein	Acetate	970.97	CRC	631.978	11
di_p11	High_protein	Ammonia	940.84	CRC	767.19	11
di_p11	High_protein	Formate	789.99	CRC	583.15	11
di_p11	High_protein	Butyrate	724.516	CRC	117.263	11
di_p11	High_protein	Indole	-667.681	CRC	-120.004	11
di_p11	High_protein	Succinate	492.195	CRC	589.106	11
di_p11	High_protein	Trimethylamine	8.44096	CRC	213.247	11
di_p11	High_protein	Hydrogen Sulfide	0.0186997	CRC	1.10394	11
di_p11	High_protein	Putrescine	-0.00841173	CRC	0.143971	11
di_p11	High_protein	Propionate	0	CRC	0	11
di_p11	High_protein	Valerate	0	CRC	0	11
di_p11	High_protein	Lactate	0	CRC	0	11
di_p11	High_protein	Phenol	0	CRC	0	11
di_p11	Mediterranean	Acetate	983.109	CRC	773.186	11
di_p11	Mediterranean	Ammonia	938.38	CRC	668.537	11
di_p11	Mediterranean	Formate	771.725	CRC	496.774	11
di_p11	Mediterranean	Butyrate	718.887	CRC	115.103	11
di_p11	Mediterranean	Indole	-660.723	CRC	-143.69	11
di_p11	Mediterranean	Succinate	449.654	CRC	41.1506	11
di_p11	Mediterranean	Trimethylamine	7.44765	CRC	215.621	11
di_p11	Mediterranean	Putrescine	-0.0106672	CRC	-0.0179431	11
di_p11	Mediterranean	Hydrogen Sulfide	-0.0066221	CRC	1.13583	11
di_p11	Mediterranean	Propionate	0	CRC	0	11
di_p11	Mediterranean	Valerate	0	CRC	0	11
di_p11	Mediterranean	Lactate	0	CRC	0	11
di_p11	Mediterranean	Phenol	0	CRC	0	11
di_p11	Vegan	Ammonia	944.652	CRC	736.584	11
di_p11	Vegan	Butyrate	759.296	CRC	142.61	11
di_p11	Vegan	Indole	-504.833	CRC	-125.309	11
di_p11	Vegan	Acetate	222.406	CRC	638.555	11
di_p11	Vegan	Formate	-187.587	CRC	286.501	11
di_p11	Vegan	Succinate	172.904	CRC	593.779	11
di_p11	Vegan	Trimethylamine	7.59743	CRC	250.562	11
di_p11	Vegan	Hydrogen Sulfide	0.0222629	CRC	0.674618	11
di_p11	Vegan	Putrescine	-0.0107416	CRC	0.596456	11
di_p11	Vegan	Propionate	0	CRC	0	11
di_p11	Vegan	Valerate	0	CRC	0	11
di_p11	Vegan	Lactate	0	CRC	0	11
di_p11	Vegan	Phenol	0	CRC	0	11
di_p12	Gluten_Free	Acetate	965.826	CRC	530.276	12
di_p12	Gluten_Free	Ammonia	859.545	CRC	710.913	12
di_p12	Gluten_Free	Succinate	411.173	CRC	558.682	12
di_p12	Gluten_Free	Formate	189.041	CRC	301.257	12
di_p12	Gluten_Free	Butyrate	173.816	CRC	119.344	12
di_p12	Gluten_Free	Indole	-73.2221	CRC	-60.468	12
di_p12	Gluten_Free	Hydrogen Sulfide	19.2588	CRC	11.5365	12
di_p12	Gluten_Free	Trimethylamine	7.86191	CRC	217.576	12
di_p12	Gluten_Free	Putrescine	-0.0256516	CRC	-0.0142275	12
di_p12	Gluten_Free	Propionate	0	CRC	0	12
di_p12	Gluten_Free	Valerate	0	CRC	0	12
di_p12	Gluten_Free	Lactate	0	CRC	0	12
di_p12	Gluten_Free	Phenol	0	CRC	0	12
di_p12	High_Fiber	Acetate	985.393	CRC	949.481	12
di_p12	High_Fiber	Ammonia	862.097	CRC	767.774	12
di_p12	High_Fiber	Succinate	484.103	CRC	252.852	12
di_p12	High_Fiber	Formate	404.147	CRC	409.199	12
di_p12	High_Fiber	Butyrate	176.08	CRC	148.38	12
di_p12	High_Fiber	Trimethylamine	2.16285	CRC	12.5916	12
di_p12	High_Fiber	Hydrogen Sulfide	1.8294	CRC	1.2075	12
di_p12	High_Fiber	Indole	1.80989	CRC	1.36363	12
di_p12	High_Fiber	Putrescine	-0.0386198	CRC	-0.029809	12
di_p12	High_Fiber	Propionate	0	CRC	0	12
di_p12	High_Fiber	Valerate	0	CRC	0	12
di_p12	High_Fiber	Lactate	0	CRC	0	12
di_p12	High_Fiber	Phenol	0	CRC	0	12
di_p12	High_fat	Acetate	979.94	CRC	725.37	12
di_p12	High_fat	Succinate	769.791	CRC	545.285	12
di_p12	High_fat	Ammonia	663.743	CRC	572.431	12
di_p12	High_fat	Butyrate	168.945	CRC	117.143	12
di_p12	High_fat	Indole	-150.695	CRC	-113.997	12
di_p12	High_fat	Formate	144.23	CRC	432.101	12
di_p12	High_fat	Hydrogen Sulfide	-9.15056	CRC	-3.58459	12
di_p12	High_fat	Trimethylamine	-2.11465	CRC	0.251808	12
di_p12	High_fat	Putrescine	-0.0358829	CRC	-0.154578	12
di_p12	High_fat	Propionate	0	CRC	0	12
di_p12	High_fat	Valerate	0	CRC	0	12
di_p12	High_fat	Lactate	0	CRC	0	12
di_p12	High_fat	Phenol	0	CRC	0	12
di_p12	High_protein	Acetate	952.419	CRC	631.978	12
di_p12	High_protein	Ammonia	855.171	CRC	767.19	12
di_p12	High_protein	Succinate	457.536	CRC	589.106	12
di_p12	High_protein	Formate	312.547	CRC	583.15	12
di_p12	High_protein	Butyrate	168.124	CRC	117.263	12
di_p12	High_protein	Indole	-159.027	CRC	-120.004	12
di_p12	High_protein	Trimethylamine	8.46888	CRC	213.247	12
di_p12	High_protein	Hydrogen Sulfide	3.63039	CRC	1.10394	12
di_p12	High_protein	Putrescine	-0.0252314	CRC	0.143971	12
di_p12	High_protein	Propionate	0	CRC	0	12
di_p12	High_protein	Valerate	0	CRC	0	12
di_p12	High_protein	Lactate	0	CRC	0	12
di_p12	High_protein	Phenol	0	CRC	0	12
di_p12	Mediterranean	Acetate	964.638	CRC	773.186	12
di_p12	Mediterranean	Ammonia	767.88	CRC	668.537	12
di_p12	Mediterranean	Succinate	366.701	CRC	41.1506	12
di_p12	Mediterranean	Formate	255.109	CRC	496.774	12
di_p12	Mediterranean	Butyrate	165.782	CRC	115.103	12
di_p12	Mediterranean	Indole	-158.844	CRC	-143.69	12
di_p12	Mediterranean	Trimethylamine	7.136	CRC	215.621	12
di_p12	Mediterranean	Hydrogen Sulfide	3.93041	CRC	1.13583	12
di_p12	Mediterranean	Putrescine	-0.0325912	CRC	-0.0179431	12
di_p12	Mediterranean	Propionate	0	CRC	0	12
di_p12	Mediterranean	Valerate	0	CRC	0	12
di_p12	Mediterranean	Lactate	0	CRC	0	12
di_p12	Mediterranean	Phenol	0	CRC	0	12
di_p12	Vegan	Ammonia	854.097	CRC	736.584	12
di_p12	Vegan	Acetate	788.006	CRC	638.555	12
di_p12	Vegan	Succinate	370.769	CRC	593.779	12
di_p12	Vegan	Butyrate	174.614	CRC	142.61	12
di_p12	Vegan	Indole	-116.781	CRC	-125.309	12
di_p12	Vegan	Formate	37.2292	CRC	286.501	12
di_p12	Vegan	Trimethylamine	10.1045	CRC	250.562	12
di_p12	Vegan	Hydrogen Sulfide	1.85995	CRC	0.674618	12
di_p12	Vegan	Putrescine	-0.0415263	CRC	0.596456	12
di_p12	Vegan	Propionate	0	CRC	0	12
di_p12	Vegan	Valerate	0	CRC	0	12
di_p12	Vegan	Lactate	0	CRC	0	12
di_p12	Vegan	Phenol	0	CRC	0	12
di_p13	Gluten_Free	Ammonia	771.365	CRC	710.913	13
di_p13	Gluten_Free	Acetate	692.141	CRC	530.276	13
di_p13	Gluten_Free	Succinate	503.196	CRC	558.682	13
di_p13	Gluten_Free	Butyrate	151.53	CRC	119.344	13
di_p13	Gluten_Free	Formate	-75.0987	CRC	301.257	13
di_p13	Gluten_Free	Indole	-68.6759	CRC	-60.468	13
di_p13	Gluten_Free	Hydrogen Sulfide	56.754	CRC	11.5365	13
di_p13	Gluten_Free	Trimethylamine	53.7792	CRC	217.576	13
di_p13	Gluten_Free	Putrescine	-0.0076146	CRC	-0.0142275	13
di_p13	Gluten_Free	Propionate	0	CRC	0	13
di_p13	Gluten_Free	Valerate	0	CRC	0	13
di_p13	Gluten_Free	Lactate	0	CRC	0	13
di_p13	Gluten_Free	Phenol	0	CRC	0	13
di_p13	High_Fiber	Acetate	908.157	CRC	949.481	13
di_p13	High_Fiber	Ammonia	600.352	CRC	767.774	13
di_p13	High_Fiber	Succinate	511.188	CRC	252.852	13
di_p13	High_Fiber	Formate	269.568	CRC	409.199	13
di_p13	High_Fiber	Butyrate	166.839	CRC	148.38	13
di_p13	High_Fiber	Trimethylamine	9.4974	CRC	12.5916	13
di_p13	High_Fiber	Hydrogen Sulfide	3.82963	CRC	1.2075	13
di_p13	High_Fiber	Indole	2.55849	CRC	1.36363	13
di_p13	High_Fiber	Putrescine	-0.0241915	CRC	-0.029809	13
di_p13	High_Fiber	Propionate	0	CRC	0	13
di_p13	High_Fiber	Valerate	0	CRC	0	13
di_p13	High_Fiber	Lactate	0	CRC	0	13
di_p13	High_Fiber	Phenol	0	CRC	0	13
di_p13	High_fat	Acetate	649.651	CRC	725.37	13
di_p13	High_fat	Succinate	546.412	CRC	545.285	13
di_p13	High_fat	Ammonia	296.662	CRC	572.431	13
di_p13	High_fat	Formate	198.609	CRC	432.101	13
di_p13	High_fat	Butyrate	150.72	CRC	117.143	13
di_p13	High_fat	Indole	-131.777	CRC	-113.997	13
di_p13	High_fat	Trimethylamine	2.94138	CRC	0.251808	13
di_p13	High_fat	Hydrogen Sulfide	1.71358	CRC	-3.58459	13
di_p13	High_fat	Putrescine	-0.086351	CRC	-0.154578	13
di_p13	High_fat	Propionate	0	CRC	0	13
di_p13	High_fat	Valerate	0	CRC	0	13
di_p13	High_fat	Lactate	0	CRC	0	13
di_p13	High_fat	Phenol	0	CRC	0	13
di_p13	High_protein	Ammonia	895.498	CRC	767.19	13
di_p13	High_protein	Acetate	777.021	CRC	631.978	13
di_p13	High_protein	Formate	656.543	CRC	583.15	13
di_p13	High_protein	Succinate	529.922	CRC	589.106	13
di_p13	High_protein	Butyrate	147.478	CRC	117.263	13
di_p13	High_protein	Indole	-145.555	CRC	-120.004	13
di_p13	High_protein	Trimethylamine	55.7119	CRC	213.247	13
di_p13	High_protein	Hydrogen Sulfide	0.434392	CRC	1.10394	13
di_p13	High_protein	Putrescine	-0.00922397	CRC	0.143971	13
di_p13	High_protein	Propionate	0	CRC	0	13
di_p13	High_protein	Valerate	0	CRC	0	13
di_p13	High_protein	Lactate	0	CRC	0	13
di_p13	High_protein	Phenol	0	CRC	0	13
di_p13	Mediterranean	Acetate	874.8	CRC	773.186	13
di_p13	Mediterranean	Ammonia	515.328	CRC	668.537	13
di_p13	Mediterranean	Formate	377.351	CRC	496.774	13
di_p13	Mediterranean	Succinate	343.504	CRC	41.1506	13
di_p13	Mediterranean	Indole	-154.689	CRC	-143.69	13
di_p13	Mediterranean	Butyrate	146.299	CRC	115.103	13
di_p13	Mediterranean	Trimethylamine	50.9964	CRC	215.621	13
di_p13	Mediterranean	Hydrogen Sulfide	-0.0349301	CRC	1.13583	13
di_p13	Mediterranean	Putrescine	-0.00955777	CRC	-0.0179431	13
di_p13	Mediterranean	Propionate	0	CRC	0	13
di_p13	Mediterranean	Valerate	0	CRC	0	13
di_p13	Mediterranean	Lactate	0	CRC	0	13
di_p13	Mediterranean	Phenol	0	CRC	0	13
di_p13	Vegan	Ammonia	868.573	CRC	736.584	13
di_p13	Vegan	Succinate	653.909	CRC	593.779	13
di_p13	Vegan	Acetate	623.543	CRC	638.555	13
di_p13	Vegan	Butyrate	219.564	CRC	142.61	13
di_p13	Vegan	Indole	-162.585	CRC	-125.309	13
di_p13	Vegan	Trimethylamine	73.8921	CRC	250.562	13
di_p13	Vegan	Formate	48.3022	CRC	286.501	13
di_p13	Vegan	Hydrogen Sulfide	0.73018	CRC	0.674618	13
di_p13	Vegan	Putrescine	-0.0478486	CRC	0.596456	13
di_p13	Vegan	Propionate	0	CRC	0	13
di_p13	Vegan	Valerate	0	CRC	0	13
di_p13	Vegan	Lactate	0	CRC	0	13
di_p13	Vegan	Phenol	0	CRC	0	13
di_p14	Gluten_Free	Acetate	411.656	CRC	530.276	14
di_p14	Gluten_Free	Ammonia	401.791	CRC	710.913	14
di_p14	Gluten_Free	Succinate	366.59	CRC	558.682	14
di_p14	Gluten_Free	Formate	333.092	CRC	301.257	14
di_p14	Gluten_Free	Butyrate	123.297	CRC	119.344	14
di_p14	Gluten_Free	Indole	-48.4885	CRC	-60.468	14
di_p14	Gluten_Free	Trimethylamine	9.08426	CRC	217.576	14
di_p14	Gluten_Free	Hydrogen Sulfide	4.367	CRC	11.5365	14
di_p14	Gluten_Free	Putrescine	-0.00403086	CRC	-0.0142275	14
di_p14	Gluten_Free	Propionate	0	CRC	0	14
di_p14	Gluten_Free	Valerate	0	CRC	0	14
di_p14	Gluten_Free	Lactate	0	CRC	0	14
di_p14	Gluten_Free	Phenol	0	CRC	0	14
di_p14	High_Fiber	Acetate	978.986	CRC	949.481	14
di_p14	High_Fiber	Ammonia	888.607	CRC	767.774	14
di_p14	High_Fiber	Formate	606.025	CRC	409.199	14
di_p14	High_Fiber	Succinate	604.149	CRC	252.852	14
di_p14	High_Fiber	Butyrate	481.931	CRC	148.38	14
di_p14	High_Fiber	Trimethylamine	14.0328	CRC	12.5916	14
di_p14	High_Fiber	Indole	3.05475	CRC	1.36363	14
di_p14	High_Fiber	Hydrogen Sulfide	1.06029	CRC	1.2075	14
di_p14	High_Fiber	Putrescine	-0.0211264	CRC	-0.029809	14
di_p14	High_Fiber	Propionate	0	CRC	0	14
di_p14	High_Fiber	Valerate	0	CRC	0	14
di_p14	High_Fiber	Lactate	0	CRC	0	14
di_p14	High_Fiber	Phenol	0	CRC	0	14
di_p14	High_fat	Ammonia	937.607	CRC	572.431	14
di_p14	High_fat	Acetate	800.894	CRC	725.37	14
di_p14	High_fat	Formate	680.757	CRC	432.101	14
di_p14	High_fat	Succinate	252.345	CRC	545.285	14
di_p14	High_fat	Butyrate	122.288	CRC	117.143	14
di_p14	High_fat	Indole	-107.547	CRC	-113.997	14
di_p14	High_fat	Hydrogen Sulfide	0.262338	CRC	-3.58459	14
di_p14	High_fat	Putrescine	-0.0019682	CRC	-0.154578	14
di_p14	High_fat	Trimethylamine	0.000186778	CRC	0.251808	14
di_p14	High_fat	Propionate	0	CRC	0	14
di_p14	High_fat	Valerate	0	CRC	0	14
di_p14	High_fat	Lactate	0	CRC	0	14
di_p14	High_fat	Phenol	0	CRC	0	14
di_p14	High_protein	Ammonia	980.372	CRC	767.19	14
di_p14	High_protein	Acetate	576.416	CRC	631.978	14
di_p14	High_protein	Formate	528.362	CRC	583.15	14
di_p14	High_protein	Succinate	499.792	CRC	589.106	14
di_p14	High_protein	Butyrate	120.006	CRC	117.263	14
di_p14	High_protein	Indole	-109.7	CRC	-120.004	14
di_p14	High_protein	Trimethylamine	8.79924	CRC	213.247	14
di_p14	High_protein	Hydrogen Sulfide	0.0346059	CRC	1.10394	14
di_p14	High_protein	Putrescine	-0.00408812	CRC	0.143971	14
di_p14	High_protein	Propionate	0	CRC	0	14
di_p14	High_protein	Valerate	0	CRC	0	14
di_p14	High_protein	Lactate	0	CRC	0	14
di_p14	High_protein	Phenol	0	CRC	0	14
di_p14	Mediterranean	Ammonia	963.996	CRC	668.537	14
di_p14	Mediterranean	Acetate	645.337	CRC	773.186	14
di_p14	Mediterranean	Formate	532.528	CRC	496.774	14
di_p14	Mediterranean	Succinate	442.353	CRC	41.1506	14
di_p14	Mediterranean	Indole	-123.827	CRC	-143.69	14
di_p14	Mediterranean	Butyrate	119.057	CRC	115.103	14
di_p14	Mediterranean	Trimethylamine	9.08386	CRC	215.621	14
di_p14	Mediterranean	Putrescine	-0.00559568	CRC	-0.0179431	14
di_p14	Mediterranean	Hydrogen Sulfide	-0.00175551	CRC	1.13583	14
di_p14	Mediterranean	Propionate	0	CRC	0	14
di_p14	Mediterranean	Valerate	0	CRC	0	14
di_p14	Mediterranean	Lactate	0	CRC	0	14
di_p14	Mediterranean	Phenol	0	CRC	0	14
di_p14	Vegan	Ammonia	960.551	CRC	736.584	14
di_p14	Vegan	Acetate	485.677	CRC	638.555	14
di_p14	Vegan	Succinate	441.779	CRC	593.779	14
di_p14	Vegan	Formate	371.98	CRC	286.501	14
di_p14	Vegan	Butyrate	124.608	CRC	142.61	14
di_p14	Vegan	Indole	-98.2419	CRC	-125.309	14
di_p14	Vegan	Trimethylamine	9.18047	CRC	250.562	14
di_p14	Vegan	Hydrogen Sulfide	0.0405378	CRC	0.674618	14
di_p14	Vegan	Putrescine	-0.00647313	CRC	0.596456	14
di_p14	Vegan	Propionate	0	CRC	0	14
di_p14	Vegan	Valerate	0	CRC	0	14
di_p14	Vegan	Lactate	0	CRC	0	14
di_p14	Vegan	Phenol	0	CRC	0	14
di_p15	Gluten_Free	Ammonia	989.365	CRC	710.913	15
di_p15	Gluten_Free	Succinate	838.136	CRC	558.682	15
di_p15	Gluten_Free	Trimethylamine	683.351	CRC	217.576	15
di_p15	Gluten_Free	Formate	678.334	CRC	301.257	15
di_p15	Gluten_Free	Acetate	400.139	CRC	530.276	15
di_p15	Gluten_Free	Butyrate	2.348	CRC	119.344	15
di_p15	Gluten_Free	Indole	-1.68927	CRC	-60.468	15
di_p15	Gluten_Free	Hydrogen Sulfide	0.374132	CRC	11.5365	15
di_p15	Gluten_Free	Putrescine	-0.0111185	CRC	-0.0142275	15
di_p15	Gluten_Free	Propionate	0	CRC	0	15
di_p15	Gluten_Free	Valerate	0	CRC	0	15
di_p15	Gluten_Free	Lactate	0	CRC	0	15
di_p15	Gluten_Free	Phenol	0	CRC	0	15
di_p15	High_Fiber	Acetate	978.159	CRC	949.481	15
di_p15	High_Fiber	Ammonia	872.804	CRC	767.774	15
di_p15	High_Fiber	Formate	672.918	CRC	409.199	15
di_p15	High_Fiber	Succinate	-74.8183	CRC	252.852	15
di_p15	High_Fiber	Trimethylamine	3.8228	CRC	12.5916	15
di_p15	High_Fiber	Butyrate	2.36581	CRC	148.38	15
di_p15	High_Fiber	Putrescine	-0.0462783	CRC	-0.029809	15
di_p15	High_Fiber	Hydrogen Sulfide	0.0238761	CRC	1.2075	15
di_p15	High_Fiber	Indole	0.0233623	CRC	1.36363	15
di_p15	High_Fiber	Propionate	0	CRC	0	15
di_p15	High_Fiber	Valerate	0	CRC	0	15
di_p15	High_Fiber	Lactate	0	CRC	0	15
di_p15	High_Fiber	Phenol	0	CRC	0	15
di_p15	High_fat	Ammonia	987.101	CRC	572.431	15
di_p15	High_fat	Acetate	982.916	CRC	725.37	15
di_p15	High_fat	Formate	717.047	CRC	432.101	15
di_p15	High_fat	Succinate	666.227	CRC	545.285	15
di_p15	High_fat	Trimethylamine	-7.12588	CRC	0.251808	15
di_p15	High_fat	Indole	-3.11742	CRC	-113.997	15
di_p15	High_fat	Butyrate	2.31865	CRC	117.143	15
di_p15	High_fat	Putrescine	-0.0702539	CRC	-0.154578	15
di_p15	High_fat	Hydrogen Sulfide	0.02198	CRC	-3.58459	15
di_p15	High_fat	Propionate	0	CRC	0	15
di_p15	High_fat	Valerate	0	CRC	0	15
di_p15	High_fat	Lactate	0	CRC	0	15
di_p15	High_fat	Phenol	0	CRC	0	15
di_p15	High_protein	Ammonia	986.99	CRC	767.19	15
di_p15	High_protein	Succinate	918.764	CRC	589.106	15
di_p15	High_protein	Formate	717.892	CRC	583.15	15
di_p15	High_protein	Trimethylamine	661.716	CRC	213.247	15
di_p15	High_protein	Acetate	579.991	CRC	631.978	15
di_p15	High_protein	Indole	-3.31933	CRC	-120.004	15
di_p15	High_protein	Butyrate	2.2855	CRC	117.263	15
di_p15	High_protein	Putrescine	-0.0382696	CRC	0.143971	15
di_p15	High_protein	Hydrogen Sulfide	0.00176254	CRC	1.10394	15
di_p15	High_protein	Propionate	0	CRC	0	15
di_p15	High_protein	Valerate	0	CRC	0	15
di_p15	High_protein	Lactate	0	CRC	0	15
di_p15	High_protein	Phenol	0	CRC	0	15
di_p15	Mediterranean	Ammonia	971.031	CRC	668.537	15
di_p15	Mediterranean	Formate	947.923	CRC	496.774	15
di_p15	Mediterranean	Acetate	924.162	CRC	773.186	15
di_p15	Mediterranean	Trimethylamine	683.351	CRC	215.621	15
di_p15	Mediterranean	Succinate	-424.914	CRC	41.1506	15
di_p15	Mediterranean	Indole	-4.309	CRC	-143.69	15
di_p15	Mediterranean	Butyrate	2.26775	CRC	115.103	15
di_p15	Mediterranean	Putrescine	-0.0145326	CRC	-0.0179431	15
di_p15	Mediterranean	Hydrogen Sulfide	-0.00170728	CRC	1.13583	15
di_p15	Mediterranean	Propionate	0	CRC	0	15
di_p15	Mediterranean	Valerate	0	CRC	0	15
di_p15	Mediterranean	Lactate	0	CRC	0	15
di_p15	Mediterranean	Phenol	0	CRC	0	15
di_p15	Vegan	Ammonia	921.327	CRC	736.584	15
di_p15	Vegan	Acetate	866.202	CRC	638.555	15
di_p15	Vegan	Trimethylamine	691.502	CRC	250.562	15
di_p15	Vegan	Succinate	638.097	CRC	593.779	15
di_p15	Vegan	Formate	601.544	CRC	286.501	15
di_p15	Vegan	Indole	-3.02913	CRC	-125.309	15
di_p15	Vegan	Butyrate	2.35149	CRC	142.61	15
di_p15	Vegan	Putrescine	-0.0128179	CRC	0.596456	15
di_p15	Vegan	Hydrogen Sulfide	0.00207974	CRC	0.674618	15
di_p15	Vegan	Propionate	0	CRC	0	15
di_p15	Vegan	Valerate	0	CRC	0	15
di_p15	Vegan	Lactate	0	CRC	0	15
di_p15	Vegan	Phenol	0	CRC	0	15
di_p17	Gluten_Free	Ammonia	981.181	CRC	710.913	17
di_p17	Gluten_Free	Succinate	934.88	CRC	558.682	17
di_p17	Gluten_Free	Acetate	742.775	CRC	530.276	17
di_p17	Gluten_Free	Formate	304.717	CRC	301.257	17
di_p17	Gluten_Free	Trimethylamine	261.954	CRC	217.576	17
di_p17	Gluten_Free	Indole	-9.18943	CRC	-60.468	17
di_p17	Gluten_Free	Butyrate	1.43412	CRC	119.344	17
di_p17	Gluten_Free	Hydrogen Sulfide	0.173282	CRC	11.5365	17
di_p17	Gluten_Free	Putrescine	-0.0275881	CRC	-0.0142275	17
di_p17	Gluten_Free	Propionate	0	CRC	0	17
di_p17	Gluten_Free	Valerate	0	CRC	0	17
di_p17	Gluten_Free	Lactate	0	CRC	0	17
di_p17	Gluten_Free	Phenol	0	CRC	0	17
di_p17	High_Fiber	Ammonia	963.064	CRC	767.774	17
di_p17	High_Fiber	Formate	882.828	CRC	409.199	17
di_p17	High_Fiber	Succinate	518.94	CRC	252.852	17
di_p17	High_Fiber	Acetate	509.843	CRC	949.481	17
di_p17	High_Fiber	Trimethylamine	3.2712	CRC	12.5916	17
di_p17	High_Fiber	Butyrate	1.46461	CRC	148.38	17
di_p17	High_Fiber	Putrescine	-0.0458686	CRC	-0.029809	17
di_p17	High_Fiber	Indole	0.012888	CRC	1.36363	17
di_p17	High_Fiber	Hydrogen Sulfide	0.0111714	CRC	1.2075	17
di_p17	High_Fiber	Propionate	0	CRC	0	17
di_p17	High_Fiber	Valerate	0	CRC	0	17
di_p17	High_Fiber	Lactate	0	CRC	0	17
di_p17	High_Fiber	Phenol	0	CRC	0	17
di_p17	High_fat	Ammonia	971.778	CRC	572.431	17
di_p17	High_fat	Succinate	838.508	CRC	545.285	17
di_p17	High_fat	Acetate	827.275	CRC	725.37	17
di_p17	High_fat	Formate	323.952	CRC	432.101	17
di_p17	High_fat	Indole	-10.2618	CRC	-113.997	17
di_p17	High_fat	Putrescine	-1.45692	CRC	-0.154578	17
di_p17	High_fat	Butyrate	1.41619	CRC	117.143	17
di_p17	High_fat	Trimethylamine	-0.979162	CRC	0.251808	17
di_p17	High_fat	Hydrogen Sulfide	0.0104317	CRC	-3.58459	17
di_p17	High_fat	Propionate	0	CRC	0	17
di_p17	High_fat	Valerate	0	CRC	0	17
di_p17	High_fat	Lactate	0	CRC	0	17
di_p17	High_fat	Phenol	0	CRC	0	17
di_p17	High_protein	Ammonia	971.865	CRC	767.19	17
di_p17	High_protein	Acetate	815.903	CRC	631.978	17
di_p17	High_protein	Succinate	574.759	CRC	589.106	17
di_p17	High_protein	Formate	301.533	CRC	583.15	17
di_p17	High_protein	Trimethylamine	253.716	CRC	213.247	17
di_p17	High_protein	Indole	-11.482	CRC	-120.004	17
di_p17	High_protein	Butyrate	1.39595	CRC	117.263	17
di_p17	High_protein	Putrescine	-0.0374218	CRC	0.143971	17
di_p17	High_protein	Hydrogen Sulfide	0.00142695	CRC	1.10394	17
di_p17	High_protein	Propionate	0	CRC	0	17
di_p17	High_protein	Valerate	0	CRC	0	17
di_p17	High_protein	Lactate	0	CRC	0	17
di_p17	High_protein	Phenol	0	CRC	0	17
di_p17	Mediterranean	Formate	939.783	CRC	496.774	17
di_p17	Mediterranean	Ammonia	522.639	CRC	668.537	17
di_p17	Mediterranean	Succinate	-485.555	CRC	41.1506	17
di_p17	Mediterranean	Trimethylamine	261.954	CRC	215.621	17
di_p17	Mediterranean	Acetate	145.712	CRC	773.186	17
di_p17	Mediterranean	Indole	-17.2699	CRC	-143.69	17
di_p17	Mediterranean	Butyrate	1.3851	CRC	115.103	17
di_p17	Mediterranean	Putrescine	-0.0351669	CRC	-0.0179431	17
di_p17	Mediterranean	Hydrogen Sulfide	2.44682e-25	CRC	1.13583	17
di_p17	Mediterranean	Propionate	0	CRC	0	17
di_p17	Mediterranean	Valerate	0	CRC	0	17
di_p17	Mediterranean	Lactate	0	CRC	0	17
di_p17	Mediterranean	Phenol	0	CRC	0	17
di_p17	Vegan	Ammonia	974.284	CRC	736.584	17
di_p17	Vegan	Acetate	785.675	CRC	638.555	17
di_p17	Vegan	Succinate	665.139	CRC	593.779	17
di_p17	Vegan	Formate	470.304	CRC	286.501	17
di_p17	Vegan	Trimethylamine	270.308	CRC	250.562	17
di_p17	Vegan	Indole	-8.52027	CRC	-125.309	17
di_p17	Vegan	Butyrate	1.47434	CRC	142.61	17
di_p17	Vegan	Putrescine	-0.0312526	CRC	0.596456	17
di_p17	Vegan	Hydrogen Sulfide	0.00169879	CRC	0.674618	17
di_p17	Vegan	Propionate	0	CRC	0	17
di_p17	Vegan	Valerate	0	CRC	0	17
di_p17	Vegan	Lactate	0	CRC	0	17
di_p17	Vegan	Phenol	0	CRC	0	17
di_p18	Gluten_Free	Acetate	889.748	CRC	530.276	18
di_p18	Gluten_Free	Ammonia	807.096	CRC	710.913	18
di_p18	Gluten_Free	Succinate	350.946	CRC	558.682	18
di_p18	Gluten_Free	Formate	107.053	CRC	301.257	18
di_p18	Gluten_Free	Hydrogen Sulfide	-46.5403	CRC	11.5365	18
di_p18	Gluten_Free	Trimethylamine	36.2148	CRC	217.576	18
di_p18	Gluten_Free	Butyrate	28.4222	CRC	119.344	18
di_p18	Gluten_Free	Indole	-22.2818	CRC	-60.468	18
di_p18	Gluten_Free	Putrescine	-0.0332408	CRC	-0.0142275	18
di_p18	Gluten_Free	Propionate	0	CRC	0	18
di_p18	Gluten_Free	Valerate	0	CRC	0	18
di_p18	Gluten_Free	Lactate	0	CRC	0	18
di_p18	Gluten_Free	Phenol	0	CRC	0	18
di_p18	High_Fiber	Acetate	991.201	CRC	949.481	18
di_p18	High_Fiber	Ammonia	732.46	CRC	767.774	18
di_p18	High_Fiber	Succinate	292.922	CRC	252.852	18
di_p18	High_Fiber	Formate	182.434	CRC	409.199	18
di_p18	High_Fiber	Butyrate	18.9548	CRC	148.38	18
di_p18	High_Fiber	Trimethylamine	11.1896	CRC	12.5916	18
di_p18	High_Fiber	Indole	0.444489	CRC	1.36363	18
di_p18	High_Fiber	Hydrogen Sulfide	0.216194	CRC	1.2075	18
di_p18	High_Fiber	Putrescine	-0.0446995	CRC	-0.029809	18
di_p18	High_Fiber	Propionate	0	CRC	0	18
di_p18	High_Fiber	Valerate	0	CRC	0	18
di_p18	High_Fiber	Lactate	0	CRC	0	18
di_p18	High_Fiber	Phenol	0	CRC	0	18
di_p18	High_fat	Acetate	936.563	CRC	725.37	18
di_p18	High_fat	Succinate	721.684	CRC	545.285	18
di_p18	High_fat	Ammonia	662.474	CRC	572.431	18
di_p18	High_fat	Hydrogen Sulfide	-59.8412	CRC	-3.58459	18
di_p18	High_fat	Formate	46.0354	CRC	432.101	18
di_p18	High_fat	Indole	-25.0629	CRC	-113.997	18
di_p18	High_fat	Butyrate	13.2593	CRC	117.143	18
di_p18	High_fat	Trimethylamine	4.62492	CRC	0.251808	18
di_p18	High_fat	Putrescine	-0.0163699	CRC	-0.154578	18
di_p18	High_fat	Propionate	0	CRC	0	18
di_p18	High_fat	Valerate	0	CRC	0	18
di_p18	High_fat	Lactate	0	CRC	0	18
di_p18	High_fat	Phenol	0	CRC	0	18
di_p18	High_protein	Acetate	888.481	CRC	631.978	18
di_p18	High_protein	Ammonia	789.42	CRC	767.19	18
di_p18	High_protein	Succinate	352.921	CRC	589.106	18
di_p18	High_protein	Formate	217.712	CRC	583.15	18
di_p18	High_protein	Trimethylamine	40.7692	CRC	213.247	18
di_p18	High_protein	Indole	-29.6652	CRC	-120.004	18
di_p18	High_protein	Hydrogen Sulfide	18.7708	CRC	1.10394	18
di_p18	High_protein	Butyrate	18.3381	CRC	117.263	18
di_p18	High_protein	Putrescine	-0.0314194	CRC	0.143971	18
di_p18	High_protein	Propionate	0	CRC	0	18
di_p18	High_protein	Valerate	0	CRC	0	18
di_p18	High_protein	Lactate	0	CRC	0	18
di_p18	High_protein	Phenol	0	CRC	0	18
di_p18	Mediterranean	Acetate	922.558	CRC	773.186	18
di_p18	Mediterranean	Ammonia	745.081	CRC	668.537	18
di_p18	Mediterranean	Succinate	246.456	CRC	41.1506	18
di_p18	Mediterranean	Formate	142.487	CRC	496.774	18
di_p18	Mediterranean	Indole	-37.2182	CRC	-143.69	18
di_p18	Mediterranean	Trimethylamine	31.8391	CRC	215.621	18
di_p18	Mediterranean	Hydrogen Sulfide	21.6885	CRC	1.13583	18
di_p18	Mediterranean	Butyrate	14.7077	CRC	115.103	18
di_p18	Mediterranean	Putrescine	-0.0416961	CRC	-0.0179431	18
di_p18	Mediterranean	Propionate	0	CRC	0	18
di_p18	Mediterranean	Valerate	0	CRC	0	18
di_p18	Mediterranean	Lactate	0	CRC	0	18
di_p18	Mediterranean	Phenol	0	CRC	0	18
di_p18	Vegan	Acetate	931.26	CRC	638.555	18
di_p18	Vegan	Ammonia	806.266	CRC	736.584	18
di_p18	Vegan	Succinate	395.637	CRC	593.779	18
di_p18	Vegan	Formate	173.817	CRC	286.501	18
di_p18	Vegan	Trimethylamine	33.4355	CRC	250.562	18
di_p18	Vegan	Butyrate	21.2111	CRC	142.61	18
di_p18	Vegan	Indole	-18.1128	CRC	-125.309	18
di_p18	Vegan	Hydrogen Sulfide	9.16749	CRC	0.674618	18
di_p18	Vegan	Putrescine	-0.0411493	CRC	0.596456	18
di_p18	Vegan	Propionate	0	CRC	0	18
di_p18	Vegan	Valerate	0	CRC	0	18
di_p18	Vegan	Lactate	0	CRC	0	18
di_p18	Vegan	Phenol	0	CRC	0	18
di_p19	Gluten_Free	Acetate	825.155	CRC	530.276	19
di_p19	Gluten_Free	Ammonia	731.399	CRC	710.913	19
di_p19	Gluten_Free	Succinate	337.296	CRC	558.682	19
di_p19	Gluten_Free	Formate	277.101	CRC	301.257	19
di_p19	Gluten_Free	Indole	-192.698	CRC	-60.468	19
di_p19	Gluten_Free	Butyrate	142.912	CRC	119.344	19
di_p19	Gluten_Free	Trimethylamine	9.29752	CRC	217.576	19
di_p19	Gluten_Free	Hydrogen Sulfide	0.425921	CRC	11.5365	19
di_p19	Gluten_Free	Putrescine	-0.0275638	CRC	-0.0142275	19
di_p19	Gluten_Free	Propionate	0	CRC	0	19
di_p19	Gluten_Free	Valerate	0	CRC	0	19
di_p19	Gluten_Free	Lactate	0	CRC	0	19
di_p19	Gluten_Free	Phenol	0	CRC	0	19
di_p19	High_Fiber	Acetate	991.971	CRC	949.481	19
di_p19	High_Fiber	Ammonia	840.421	CRC	767.774	19
di_p19	High_Fiber	Succinate	445.28	CRC	252.852	19
di_p19	High_Fiber	Formate	351.225	CRC	409.199	19
di_p19	High_Fiber	Butyrate	187.22	CRC	148.38	19
di_p19	High_Fiber	Trimethylamine	5.923	CRC	12.5916	19
di_p19	High_Fiber	Indole	1.57179	CRC	1.36363	19
di_p19	High_Fiber	Hydrogen Sulfide	1.0849	CRC	1.2075	19
di_p19	High_Fiber	Putrescine	-0.0380072	CRC	-0.029809	19
di_p19	High_Fiber	Propionate	0	CRC	0	19
di_p19	High_Fiber	Valerate	0	CRC	0	19
di_p19	High_Fiber	Lactate	0	CRC	0	19
di_p19	High_Fiber	Phenol	0	CRC	0	19
di_p19	High_fat	Acetate	828.883	CRC	725.37	19
di_p19	High_fat	Ammonia	720.83	CRC	572.431	19
di_p19	High_fat	Succinate	607.275	CRC	545.285	19
di_p19	High_fat	Indole	-239.239	CRC	-113.997	19
di_p19	High_fat	Formate	198.379	CRC	432.101	19
di_p19	High_fat	Butyrate	137.212	CRC	117.143	19
di_p19	High_fat	Hydrogen Sulfide	-14.6416	CRC	-3.58459	19
di_p19	High_fat	Trimethylamine	2.05511	CRC	0.251808	19
di_p19	High_fat	Putrescine	-0.0136838	CRC	-0.154578	19
di_p19	High_fat	Propionate	0	CRC	0	19
di_p19	High_fat	Valerate	0	CRC	0	19
di_p19	High_fat	Lactate	0	CRC	0	19
di_p19	High_fat	Phenol	0	CRC	0	19
di_p19	High_protein	Acetate	812.341	CRC	631.978	19
di_p19	High_protein	Ammonia	578.287	CRC	767.19	19
di_p19	High_protein	Succinate	448.518	CRC	589.106	19
di_p19	High_protein	Formate	345.402	CRC	583.15	19
di_p19	High_protein	Indole	-262.184	CRC	-120.004	19
di_p19	High_protein	Butyrate	135.588	CRC	117.263	19
di_p19	High_protein	Trimethylamine	11.5343	CRC	213.247	19
di_p19	High_protein	Hydrogen Sulfide	4.72726	CRC	1.10394	19
di_p19	High_protein	Putrescine	-0.0259854	CRC	0.143971	19
di_p19	High_protein	Propionate	0	CRC	0	19
di_p19	High_protein	Valerate	0	CRC	0	19
di_p19	High_protein	Lactate	0	CRC	0	19
di_p19	High_protein	Phenol	0	CRC	0	19
di_p19	Mediterranean	Acetate	847.139	CRC	773.186	19
di_p19	Mediterranean	Ammonia	803.12	CRC	668.537	19
di_p19	Mediterranean	Succinate	301.847	CRC	41.1506	19
di_p19	Mediterranean	Formate	288.875	CRC	496.774	19
di_p19	Mediterranean	Indole	-281.046	CRC	-143.69	19
di_p19	Mediterranean	Butyrate	134.459	CRC	115.103	19
di_p19	Mediterranean	Trimethylamine	7.35294	CRC	215.621	19
di_p19	Mediterranean	Hydrogen Sulfide	5.34746	CRC	1.13583	19
di_p19	Mediterranean	Putrescine	-0.0347722	CRC	-0.0179431	19
di_p19	Mediterranean	Propionate	0	CRC	0	19
di_p19	Mediterranean	Valerate	0	CRC	0	19
di_p19	Mediterranean	Lactate	0	CRC	0	19
di_p19	Mediterranean	Phenol	0	CRC	0	19
di_p19	Vegan	Ammonia	808.245	CRC	736.584	19
di_p19	Vegan	Acetate	703.437	CRC	638.555	19
di_p19	Vegan	Succinate	379.37	CRC	593.779	19
di_p19	Vegan	Butyrate	163.081	CRC	142.61	19
di_p19	Vegan	Indole	-132.143	CRC	-125.309	19
di_p19	Vegan	Formate	73.1146	CRC	286.501	19
di_p19	Vegan	Trimethylamine	8.60585	CRC	250.562	19
di_p19	Vegan	Hydrogen Sulfide	2.63502	CRC	0.674618	19
di_p19	Vegan	Putrescine	-0.0356832	CRC	0.596456	19
di_p19	Vegan	Propionate	0	CRC	0	19
di_p19	Vegan	Valerate	0	CRC	0	19
di_p19	Vegan	Lactate	0	CRC	0	19
di_p19	Vegan	Phenol	0	CRC	0	19
di_p20	Gluten_Free	Acetate	978.769	CRC	530.276	20
di_p20	Gluten_Free	Ammonia	950.596	CRC	710.913	20
di_p20	Gluten_Free	Formate	796.718	CRC	301.257	20
di_p20	Gluten_Free	Butyrate	785.808	CRC	119.344	20
di_p20	Gluten_Free	Indole	-312.496	CRC	-60.468	20
di_p20	Gluten_Free	Succinate	287.023	CRC	558.682	20
di_p20	Gluten_Free	Trimethylamine	4.97478	CRC	217.576	20
di_p20	Gluten_Free	Hydrogen Sulfide	1.63872	CRC	11.5365	20
di_p20	Gluten_Free	Putrescine	-0.00764276	CRC	-0.0142275	20
di_p20	Gluten_Free	Propionate	0	CRC	0	20
di_p20	Gluten_Free	Valerate	0	CRC	0	20
di_p20	Gluten_Free	Lactate	0	CRC	0	20
di_p20	Gluten_Free	Phenol	0	CRC	0	20
di_p20	High_Fiber	Acetate	973.104	CRC	949.481	20
di_p20	High_Fiber	Ammonia	961.911	CRC	767.774	20
di_p20	High_Fiber	Succinate	840.161	CRC	252.852	20
di_p20	High_Fiber	Formate	819.414	CRC	409.199	20
di_p20	High_Fiber	Butyrate	795.383	CRC	148.38	20
di_p20	High_Fiber	Indole	4.39782	CRC	1.36363	20
di_p20	High_Fiber	Hydrogen Sulfide	0.105078	CRC	1.2075	20
di_p20	High_Fiber	Putrescine	-0.00945632	CRC	-0.029809	20
di_p20	High_Fiber	Trimethylamine	-7.50957e-193	CRC	12.5916	20
di_p20	High_Fiber	Propionate	0	CRC	0	20
di_p20	High_Fiber	Valerate	0	CRC	0	20
di_p20	High_Fiber	Lactate	0	CRC	0	20
di_p20	High_Fiber	Phenol	0	CRC	0	20
di_p20	High_fat	Acetate	988.352	CRC	725.37	20
di_p20	High_fat	Ammonia	924.263	CRC	572.431	20
di_p20	High_fat	Formate	776.571	CRC	432.101	20
di_p20	High_fat	Butyrate	775.985	CRC	117.143	20
di_p20	High_fat	Indole	-692.885	CRC	-113.997	20
di_p20	High_fat	Succinate	623.058	CRC	545.285	20
di_p20	High_fat	Hydrogen Sulfide	0.0969374	CRC	-3.58459	20
di_p20	High_fat	Putrescine	-0.00360511	CRC	-0.154578	20
di_p20	High_fat	Trimethylamine	-5.9792e-73	CRC	0.251808	20
di_p20	High_fat	Propionate	0	CRC	0	20
di_p20	High_fat	Valerate	0	CRC	0	20
di_p20	High_fat	Lactate	0	CRC	0	20
di_p20	High_fat	Phenol	0	CRC	0	20
di_p20	High_protein	Acetate	981.941	CRC	631.978	20
di_p20	High_protein	Ammonia	951.18	CRC	767.19	20
di_p20	High_protein	Formate	812.151	CRC	583.15	20
di_p20	High_protein	Butyrate	764.893	CRC	117.263	20
di_p20	High_protein	Indole	-701.908	CRC	-120.004	20
di_p20	High_protein	Succinate	495.897	CRC	589.106	20
di_p20	High_protein	Trimethylamine	4.81891	CRC	213.247	20
di_p20	High_protein	Hydrogen Sulfide	0.00933201	CRC	1.10394	20
di_p20	High_protein	Putrescine	-0.00754809	CRC	0.143971	20
di_p20	High_protein	Propionate	0	CRC	0	20
di_p20	High_protein	Valerate	0	CRC	0	20
di_p20	High_protein	Lactate	0	CRC	0	20
di_p20	High_protein	Phenol	0	CRC	0	20
di_p20	Mediterranean	Acetate	988.975	CRC	773.186	20
di_p20	Mediterranean	Ammonia	955.037	CRC	668.537	20
di_p20	Mediterranean	Formate	803.796	CRC	496.774	20
di_p20	Mediterranean	Butyrate	758.95	CRC	115.103	20
di_p20	Mediterranean	Indole	-693.544	CRC	-143.69	20
di_p20	Mediterranean	Succinate	463.486	CRC	41.1506	20
di_p20	Mediterranean	Trimethylamine	4.97478	CRC	215.621	20
di_p20	Mediterranean	Putrescine	-0.00964145	CRC	-0.0179431	20
di_p20	Mediterranean	Hydrogen Sulfide	-0.00539046	CRC	1.13583	20
di_p20	Mediterranean	Propionate	0	CRC	0	20
di_p20	Mediterranean	Valerate	0	CRC	0	20
di_p20	Mediterranean	Lactate	0	CRC	0	20
di_p20	Mediterranean	Phenol	0	CRC	0	20
di_p20	Vegan	Ammonia	950.868	CRC	736.584	20
di_p20	Vegan	Butyrate	791.165	CRC	142.61	20
di_p20	Vegan	Indole	-524.978	CRC	-125.309	20
di_p20	Vegan	Formate	-200.815	CRC	286.501	20
di_p20	Vegan	Acetate	195.88	CRC	638.555	20
di_p20	Vegan	Succinate	158.953	CRC	593.779	20
di_p20	Vegan	Trimethylamine	5.0087	CRC	250.562	20
di_p20	Vegan	Hydrogen Sulfide	0.0109935	CRC	0.674618	20
di_p20	Vegan	Putrescine	-0.00919255	CRC	0.596456	20
di_p20	Vegan	Propionate	0	CRC	0	20
di_p20	Vegan	Valerate	0	CRC	0	20
di_p20	Vegan	Lactate	0	CRC	0	20
di_p20	Vegan	Phenol	0	CRC	0	20
di_p21	Gluten_Free	Ammonia	883.559	CRC	710.913	21
di_p21	Gluten_Free	Acetate	856.023	CRC	530.276	21
di_p21	Gluten_Free	Formate	454.121	CRC	301.257	21
di_p21	Gluten_Free	Butyrate	362.39	CRC	119.344	21
di_p21	Gluten_Free	Succinate	354.068	CRC	558.682	21
di_p21	Gluten_Free	Indole	-143.068	CRC	-60.468	21
di_p21	Gluten_Free	Trimethylamine	88.1808	CRC	217.576	21
di_p21	Gluten_Free	Hydrogen Sulfide	2.33427	CRC	11.5365	21
di_p21	Gluten_Free	Putrescine	-0.0195252	CRC	-0.0142275	21
di_p21	Gluten_Free	Propionate	0	CRC	0	21
di_p21	Gluten_Free	Valerate	0	CRC	0	21
di_p21	Gluten_Free	Lactate	0	CRC	0	21
di_p21	Gluten_Free	Phenol	0	CRC	0	21
di_p21	High_Fiber	Acetate	979.887	CRC	949.481	21
di_p21	High_Fiber	Ammonia	864.238	CRC	767.774	21
di_p21	High_Fiber	Formate	457.299	CRC	409.199	21
di_p21	High_Fiber	Succinate	449.174	CRC	252.852	21
di_p21	High_Fiber	Butyrate	368.887	CRC	148.38	21
di_p21	High_Fiber	Trimethylamine	10.2463	CRC	12.5916	21
di_p21	High_Fiber	Indole	2.08389	CRC	1.36363	21
di_p21	High_Fiber	Hydrogen Sulfide	0.150131	CRC	1.2075	21
di_p21	High_Fiber	Putrescine	-0.0279098	CRC	-0.029809	21
di_p21	High_Fiber	Propionate	0	CRC	0	21
di_p21	High_Fiber	Valerate	0	CRC	0	21
di_p21	High_Fiber	Lactate	0	CRC	0	21
di_p21	High_Fiber	Phenol	0	CRC	0	21
di_p21	High_fat	Acetate	957.138	CRC	725.37	21
di_p21	High_fat	Ammonia	795.088	CRC	572.431	21
di_p21	High_fat	Succinate	659.934	CRC	545.285	21
di_p21	High_fat	Formate	410.159	CRC	432.101	21
di_p21	High_fat	Butyrate	357.86	CRC	117.143	21
di_p21	High_fat	Indole	-318.351	CRC	-113.997	21
di_p21	High_fat	Trimethylamine	4.68918	CRC	0.251808	21
di_p21	High_fat	Hydrogen Sulfide	-2.55702	CRC	-3.58459	21
di_p21	High_fat	Putrescine	-0.00898516	CRC	-0.154578	21
di_p21	High_fat	Propionate	0	CRC	0	21
di_p21	High_fat	Valerate	0	CRC	0	21
di_p21	High_fat	Lactate	0	CRC	0	21
di_p21	High_fat	Phenol	0	CRC	0	21
di_p21	High_protein	Ammonia	906.941	CRC	767.19	21
di_p21	High_protein	Acetate	896.836	CRC	631.978	21
di_p21	High_protein	Formate	529.648	CRC	583.15	21
di_p21	High_protein	Succinate	448.536	CRC	589.106	21
di_p21	High_protein	Butyrate	352.745	CRC	117.263	21
di_p21	High_protein	Indole	-322.688	CRC	-120.004	21
di_p21	High_protein	Trimethylamine	91.1863	CRC	213.247	21
di_p21	High_protein	Putrescine	-0.0219094	CRC	0.143971	21
di_p21	High_protein	Hydrogen Sulfide	0.00966653	CRC	1.10394	21
di_p21	High_protein	Propionate	0	CRC	0	21
di_p21	High_protein	Valerate	0	CRC	0	21
di_p21	High_protein	Lactate	0	CRC	0	21
di_p21	High_protein	Phenol	0	CRC	0	21
di_p21	Mediterranean	Acetate	961.239	CRC	773.186	21
di_p21	Mediterranean	Ammonia	884.505	CRC	668.537	21
di_p21	Mediterranean	Formate	492.723	CRC	496.774	21
di_p21	Mediterranean	Butyrate	350.004	CRC	115.103	21
di_p21	Mediterranean	Indole	-330.118	CRC	-143.69	21
di_p21	Mediterranean	Succinate	228.536	CRC	41.1506	21
di_p21	Mediterranean	Trimethylamine	83.7438	CRC	215.621	21
di_p21	Mediterranean	Putrescine	-0.0246312	CRC	-0.0179431	21
di_p21	Mediterranean	Hydrogen Sulfide	3.29609e-24	CRC	1.13583	21
di_p21	Mediterranean	Propionate	0	CRC	0	21
di_p21	Mediterranean	Valerate	0	CRC	0	21
di_p21	Mediterranean	Lactate	0	CRC	0	21
di_p21	Mediterranean	Phenol	0	CRC	0	21
di_p21	Vegan	Ammonia	891.561	CRC	736.584	21
di_p21	Vegan	Acetate	581.91	CRC	638.555	21
di_p21	Vegan	Butyrate	377.763	CRC	142.61	21
di_p21	Vegan	Succinate	293.079	CRC	593.779	21
di_p21	Vegan	Indole	-262.37	CRC	-125.309	21
di_p21	Vegan	Trimethylamine	87.2963	CRC	250.562	21
di_p21	Vegan	Formate	24.5346	CRC	286.501	21
di_p21	Vegan	Putrescine	-0.0236919	CRC	0.596456	21
di_p21	Vegan	Hydrogen Sulfide	0.0119356	CRC	0.674618	21
di_p21	Vegan	Propionate	0	CRC	0	21
di_p21	Vegan	Valerate	0	CRC	0	21
di_p21	Vegan	Lactate	0	CRC	0	21
di_p21	Vegan	Phenol	0	CRC	0	21
di_p22	Gluten_Free	Ammonia	846.238	CRC	710.913	22
di_p22	Gluten_Free	Succinate	600.167	CRC	558.682	22
di_p22	Gluten_Free	Butyrate	107.893	CRC	119.344	22
di_p22	Gluten_Free	Acetate	-57.5658	CRC	530.276	22
di_p22	Gluten_Free	Trimethylamine	41.3042	CRC	217.576	22
di_p22	Gluten_Free	Indole	-38.7431	CRC	-60.468	22
di_p22	Gluten_Free	Formate	-30.3435	CRC	301.257	22
di_p22	Gluten_Free	Hydrogen Sulfide	2.25099	CRC	11.5365	22
di_p22	Gluten_Free	Putrescine	-0.0220772	CRC	-0.0142275	22
di_p22	Gluten_Free	Propionate	0	CRC	0	22
di_p22	Gluten_Free	Valerate	0	CRC	0	22
di_p22	Gluten_Free	Lactate	0	CRC	0	22
di_p22	Gluten_Free	Phenol	0	CRC	0	22
di_p22	High_Fiber	Acetate	900.216	CRC	949.481	22
di_p22	High_Fiber	Ammonia	426.555	CRC	767.774	22
di_p22	High_Fiber	Succinate	354.107	CRC	252.852	22
di_p22	High_Fiber	Butyrate	197.059	CRC	148.38	22
di_p22	High_Fiber	Trimethylamine	33.6037	CRC	12.5916	22
di_p22	High_Fiber	Formate	-25.1297	CRC	409.199	22
di_p22	High_Fiber	Indole	1.71184	CRC	1.36363	22
di_p22	High_Fiber	Hydrogen Sulfide	1.13378	CRC	1.2075	22
di_p22	High_Fiber	Putrescine	-0.0183718	CRC	-0.029809	22
di_p22	High_Fiber	Propionate	0	CRC	0	22
di_p22	High_Fiber	Valerate	0	CRC	0	22
di_p22	High_Fiber	Lactate	0	CRC	0	22
di_p22	High_Fiber	Phenol	0	CRC	0	22
di_p22	High_fat	Acetate	737.614	CRC	725.37	22
di_p22	High_fat	Succinate	638.397	CRC	545.285	22
di_p22	High_fat	Ammonia	614.702	CRC	572.431	22
di_p22	High_fat	Formate	443.597	CRC	432.101	22
di_p22	High_fat	Butyrate	105.449	CRC	117.143	22
di_p22	High_fat	Indole	-87.601	CRC	-113.997	22
di_p22	High_fat	Hydrogen Sulfide	-13.6376	CRC	-3.58459	22
di_p22	High_fat	Trimethylamine	8.88745	CRC	0.251808	22
di_p22	High_fat	Putrescine	-0.00360205	CRC	-0.154578	22
di_p22	High_fat	Propionate	0	CRC	0	22
di_p22	High_fat	Valerate	0	CRC	0	22
di_p22	High_fat	Lactate	0	CRC	0	22
di_p22	High_fat	Phenol	0	CRC	0	22
di_p22	High_protein	Ammonia	960.798	CRC	767.19	22
di_p22	High_protein	Succinate	634.78	CRC	589.106	22
di_p22	High_protein	Formate	579.798	CRC	583.15	22
di_p22	High_protein	Acetate	130.951	CRC	631.978	22
di_p22	High_protein	Butyrate	113.894	CRC	117.263	22
di_p22	High_protein	Indole	-91.0271	CRC	-120.004	22
di_p22	High_protein	Trimethylamine	50.943	CRC	213.247	22
di_p22	High_protein	Hydrogen Sulfide	3.04257	CRC	1.10394	22
di_p22	High_protein	Putrescine	-0.00634901	CRC	0.143971	22
di_p22	High_protein	Propionate	0	CRC	0	22
di_p22	High_protein	Valerate	0	CRC	0	22
di_p22	High_protein	Lactate	0	CRC	0	22
di_p22	High_protein	Phenol	0	CRC	0	22
di_p22	Mediterranean	Ammonia	765.547	CRC	668.537	22
di_p22	Mediterranean	Succinate	538.108	CRC	41.1506	22
di_p22	Mediterranean	Indole	-513.315	CRC	-143.69	22
di_p22	Mediterranean	Acetate	428.745	CRC	773.186	22
di_p22	Mediterranean	Formate	-163.908	CRC	496.774	22
di_p22	Mediterranean	Butyrate	105.673	CRC	115.103	22
di_p22	Mediterranean	Trimethylamine	32.8947	CRC	215.621	22
di_p22	Mediterranean	Hydrogen Sulfide	3.4416	CRC	1.13583	22
di_p22	Mediterranean	Putrescine	-0.0278507	CRC	-0.0179431	22
di_p22	Mediterranean	Propionate	0	CRC	0	22
di_p22	Mediterranean	Valerate	0	CRC	0	22
di_p22	Mediterranean	Lactate	0	CRC	0	22
di_p22	Mediterranean	Phenol	0	CRC	0	22
di_p22	Vegan	Succinate	732.356	CRC	593.779	22
di_p22	Vegan	Ammonia	715.95	CRC	736.584	22
di_p22	Vegan	Indole	-635.233	CRC	-125.309	22
di_p22	Vegan	Acetate	-285.318	CRC	638.555	22
di_p22	Vegan	Formate	-165.466	CRC	286.501	22
di_p22	Vegan	Butyrate	155.026	CRC	142.61	22
di_p22	Vegan	Trimethylamine	42.5894	CRC	250.562	22
di_p22	Vegan	Hydrogen Sulfide	1.88167	CRC	0.674618	22
di_p22	Vegan	Putrescine	-0.0393543	CRC	0.596456	22
di_p22	Vegan	Propionate	0	CRC	0	22
di_p22	Vegan	Valerate	0	CRC	0	22
di_p22	Vegan	Lactate	0	CRC	0	22
di_p22	Vegan	Phenol	0	CRC	0	22
di_p23	Gluten_Free	Ammonia	664.604	CRC	710.913	23
di_p23	Gluten_Free	Acetate	506.137	CRC	530.276	23
di_p23	Gluten_Free	Succinate	452.366	CRC	558.682	23
di_p23	Gluten_Free	Formate	184.804	CRC	301.257	23
di_p23	Gluten_Free	Butyrate	135.934	CRC	119.344	23
di_p23	Gluten_Free	Indole	-55.6211	CRC	-60.468	23
di_p23	Gluten_Free	Hydrogen Sulfide	21.8302	CRC	11.5365	23
di_p23	Gluten_Free	Putrescine	-0.015309	CRC	-0.0142275	23
di_p23	Gluten_Free	Trimethylamine	-6.74081e-159	CRC	217.576	23
di_p23	Gluten_Free	Propionate	0	CRC	0	23
di_p23	Gluten_Free	Valerate	0	CRC	0	23
di_p23	Gluten_Free	Lactate	0	CRC	0	23
di_p23	Gluten_Free	Phenol	0	CRC	0	23
di_p23	High_Fiber	Acetate	979.619	CRC	949.481	23
di_p23	High_Fiber	Ammonia	837.8	CRC	767.774	23
di_p23	High_Fiber	Succinate	546.63	CRC	252.852	23
di_p23	High_Fiber	Formate	422.4	CRC	409.199	23
di_p23	High_Fiber	Butyrate	245.402	CRC	148.38	23
di_p23	High_Fiber	Hydrogen Sulfide	2.48711	CRC	1.2075	23
di_p23	High_Fiber	Indole	2.42791	CRC	1.36363	23
di_p23	High_Fiber	Putrescine	-0.032722	CRC	-0.029809	23
di_p23	High_Fiber	Trimethylamine	-1.24199e-191	CRC	12.5916	23
di_p23	High_Fiber	Propionate	0	CRC	0	23
di_p23	High_Fiber	Valerate	0	CRC	0	23
di_p23	High_Fiber	Lactate	0	CRC	0	23
di_p23	High_Fiber	Phenol	0	CRC	0	23
di_p23	High_fat	Acetate	867.246	CRC	725.37	23
di_p23	High_fat	Ammonia	776.041	CRC	572.431	23
di_p23	High_fat	Succinate	552.478	CRC	545.285	23
di_p23	High_fat	Formate	441.475	CRC	432.101	23
di_p23	High_fat	Butyrate	134.235	CRC	117.143	23
di_p23	High_fat	Indole	-117.471	CRC	-113.997	23
di_p23	High_fat	Hydrogen Sulfide	1.31419	CRC	-3.58459	23
di_p23	High_fat	Putrescine	-0.00701179	CRC	-0.154578	23
di_p23	High_fat	Trimethylamine	-5.55119e-72	CRC	0.251808	23
di_p23	High_fat	Propionate	0	CRC	0	23
di_p23	High_fat	Valerate	0	CRC	0	23
di_p23	High_fat	Lactate	0	CRC	0	23
di_p23	High_fat	Phenol	0	CRC	0	23
di_p23	High_protein	Ammonia	940.042	CRC	767.19	23
di_p23	High_protein	Acetate	610.571	CRC	631.978	23
di_p23	High_protein	Succinate	537.394	CRC	589.106	23
di_p23	High_protein	Formate	452.83	CRC	583.15	23
di_p23	High_protein	Butyrate	132.316	CRC	117.263	23
di_p23	High_protein	Indole	-123.526	CRC	-120.004	23
di_p23	High_protein	Hydrogen Sulfide	0.179768	CRC	1.10394	23
di_p23	High_protein	Putrescine	-0.0106771	CRC	0.143971	23
di_p23	High_protein	Trimethylamine	-4.70081e-156	CRC	213.247	23
di_p23	High_protein	Propionate	0	CRC	0	23
di_p23	High_protein	Valerate	0	CRC	0	23
di_p23	High_protein	Lactate	0	CRC	0	23
di_p23	High_protein	Phenol	0	CRC	0	23
di_p23	Mediterranean	Ammonia	857.471	CRC	668.537	23
di_p23	Mediterranean	Acetate	712.703	CRC	773.186	23
di_p23	Mediterranean	Succinate	503.385	CRC	41.1506	23
di_p23	Mediterranean	Formate	249.326	CRC	496.774	23
di_p23	Mediterranean	Indole	-234.608	CRC	-143.69	23
di_p23	Mediterranean	Butyrate	131.288	CRC	115.103	23
di_p23	Mediterranean	Putrescine	-0.0193125	CRC	-0.0179431	23
di_p23	Mediterranean	Hydrogen Sulfide	3.08252e-23	CRC	1.13583	23
di_p23	Mediterranean	Trimethylamine	-4.25765e-201	CRC	215.621	23
di_p23	Mediterranean	Propionate	0	CRC	0	23
di_p23	Mediterranean	Valerate	0	CRC	0	23
di_p23	Mediterranean	Lactate	0	CRC	0	23
di_p23	Mediterranean	Phenol	0	CRC	0	23
di_p23	Vegan	Ammonia	891.986	CRC	736.584	23
di_p23	Vegan	Succinate	489.152	CRC	593.779	23
di_p23	Vegan	Acetate	446.275	CRC	638.555	23
di_p23	Vegan	Indole	-210.361	CRC	-125.309	23
di_p23	Vegan	Butyrate	141.382	CRC	142.61	23
di_p23	Vegan	Formate	136.467	CRC	286.501	23
di_p23	Vegan	Hydrogen Sulfide	0.21652	CRC	0.674618	23
di_p23	Vegan	Putrescine	-0.0275523	CRC	0.596456	23
di_p23	Vegan	Trimethylamine	-7.5906e-177	CRC	250.562	23
di_p23	Vegan	Propionate	0	CRC	0	23
di_p23	Vegan	Valerate	0	CRC	0	23
di_p23	Vegan	Lactate	0	CRC	0	23
di_p23	Vegan	Phenol	0	CRC	0	23
di_p25	Gluten_Free	Ammonia	800.794	CRC	710.913	25
di_p25	Gluten_Free	Acetate	509.067	CRC	530.276	25
di_p25	Gluten_Free	Succinate	479.255	CRC	558.682	25
di_p25	Gluten_Free	Trimethylamine	150.356	CRC	217.576	25
di_p25	Gluten_Free	Formate	68.4679	CRC	301.257	25
di_p25	Gluten_Free	Butyrate	17.1099	CRC	119.344	25
di_p25	Gluten_Free	Indole	-6.51475	CRC	-60.468	25
di_p25	Gluten_Free	Hydrogen Sulfide	1.91483	CRC	11.5365	25
di_p25	Gluten_Free	Putrescine	-0.0109209	CRC	-0.0142275	25
di_p25	Gluten_Free	Propionate	0	CRC	0	25
di_p25	Gluten_Free	Valerate	0	CRC	0	25
di_p25	Gluten_Free	Lactate	0	CRC	0	25
di_p25	Gluten_Free	Phenol	0	CRC	0	25
di_p25	High_Fiber	Acetate	915.3	CRC	949.481	25
di_p25	High_Fiber	Ammonia	337.365	CRC	767.774	25
di_p25	High_Fiber	Succinate	187.281	CRC	252.852	25
di_p25	High_Fiber	Formate	-54.1163	CRC	409.199	25
di_p25	High_Fiber	Butyrate	18.0817	CRC	148.38	25
di_p25	High_Fiber	Trimethylamine	3.89093	CRC	12.5916	25
di_p25	High_Fiber	Indole	0.154676	CRC	1.36363	25
di_p25	High_Fiber	Hydrogen Sulfide	0.127753	CRC	1.2075	25
di_p25	High_Fiber	Putrescine	-0.017976	CRC	-0.029809	25
di_p25	High_Fiber	Propionate	0	CRC	0	25
di_p25	High_Fiber	Valerate	0	CRC	0	25
di_p25	High_Fiber	Lactate	0	CRC	0	25
di_p25	High_Fiber	Phenol	0	CRC	0	25
di_p25	High_fat	Ammonia	568.255	CRC	572.431	25
di_p25	High_fat	Acetate	541.271	CRC	725.37	25
di_p25	High_fat	Succinate	389.786	CRC	545.285	25
di_p25	High_fat	Formate	344.785	CRC	432.101	25
di_p25	High_fat	Trimethylamine	-73.4433	CRC	0.251808	25
di_p25	High_fat	Indole	-25.0954	CRC	-113.997	25
di_p25	High_fat	Butyrate	16.8961	CRC	117.143	25
di_p25	High_fat	Putrescine	-1.55722	CRC	-0.154578	25
di_p25	High_fat	Hydrogen Sulfide	0.115274	CRC	-3.58459	25
di_p25	High_fat	Propionate	0	CRC	0	25
di_p25	High_fat	Valerate	0	CRC	0	25
di_p25	High_fat	Lactate	0	CRC	0	25
di_p25	High_fat	Phenol	0	CRC	0	25
di_p25	High_protein	Ammonia	961.709	CRC	767.19	25
di_p25	High_protein	Acetate	711.14	CRC	631.978	25
di_p25	High_protein	Formate	645.26	CRC	583.15	25
di_p25	High_protein	Succinate	499.191	CRC	589.106	25
di_p25	High_protein	Trimethylamine	143.364	CRC	213.247	25
di_p25	High_protein	Indole	-25.6457	CRC	-120.004	25
di_p25	High_protein	Butyrate	16.6545	CRC	117.263	25
di_p25	High_protein	Putrescine	-0.022224	CRC	0.143971	25
di_p25	High_protein	Hydrogen Sulfide	0.0157683	CRC	1.10394	25
di_p25	High_protein	Propionate	0	CRC	0	25
di_p25	High_protein	Valerate	0	CRC	0	25
di_p25	High_protein	Lactate	0	CRC	0	25
di_p25	High_protein	Phenol	0	CRC	0	25
di_p25	Mediterranean	Acetate	876.905	CRC	773.186	25
di_p25	Mediterranean	Ammonia	745.002	CRC	668.537	25
di_p25	Mediterranean	Formate	570.897	CRC	496.774	25
di_p25	Mediterranean	Trimethylamine	150.356	CRC	215.621	25
di_p25	Mediterranean	Succinate	50.748	CRC	41.1506	25
di_p25	Mediterranean	Indole	-44.3476	CRC	-143.69	25
di_p25	Mediterranean	Butyrate	16.5251	CRC	115.103	25
di_p25	Mediterranean	Putrescine	-0.0177056	CRC	-0.0179431	25
di_p25	Mediterranean	Hydrogen Sulfide	2.70382e-24	CRC	1.13583	25
di_p25	Mediterranean	Propionate	0	CRC	0	25
di_p25	Mediterranean	Valerate	0	CRC	0	25
di_p25	Mediterranean	Lactate	0	CRC	0	25
di_p25	Mediterranean	Phenol	0	CRC	0	25
di_p25	Vegan	Ammonia	869.434	CRC	736.584	25
di_p25	Vegan	Acetate	774.047	CRC	638.555	25
di_p25	Vegan	Succinate	405.003	CRC	593.779	25
di_p25	Vegan	Trimethylamine	342.937	CRC	250.562	25
di_p25	Vegan	Formate	305.419	CRC	286.501	25
di_p25	Vegan	Indole	-62.9406	CRC	-125.309	25
di_p25	Vegan	Butyrate	26.4746	CRC	142.61	25
di_p25	Vegan	Hydrogen Sulfide	0.0282543	CRC	0.674618	25
di_p25	Vegan	Putrescine	-0.0250034	CRC	0.596456	25
di_p25	Vegan	Propionate	0	CRC	0	25
di_p25	Vegan	Valerate	0	CRC	0	25
di_p25	Vegan	Lactate	0	CRC	0	25
di_p25	Vegan	Phenol	0	CRC	0	25
di_p26	Gluten_Free	Ammonia	947.538	CRC	710.913	26
di_p26	Gluten_Free	Succinate	647.129	CRC	558.682	26
di_p26	Gluten_Free	Acetate	539.022	CRC	530.276	26
di_p26	Gluten_Free	Formate	356.818	CRC	301.257	26
di_p26	Gluten_Free	Trimethylamine	202.377	CRC	217.576	26
di_p26	Gluten_Free	Hydrogen Sulfide	0.637986	CRC	11.5365	26
di_p26	Gluten_Free	Indole	0.170619	CRC	-60.468	26
di_p26	Gluten_Free	Putrescine	-0.01238	CRC	-0.0142275	26
di_p26	Gluten_Free	Butyrate	5.46542e-16	CRC	119.344	26
di_p26	Gluten_Free	Propionate	0	CRC	0	26
di_p26	Gluten_Free	Valerate	0	CRC	0	26
di_p26	Gluten_Free	Lactate	0	CRC	0	26
di_p26	Gluten_Free	Phenol	0	CRC	0	26
di_p26	High_Fiber	Acetate	925.705	CRC	949.481	26
di_p26	High_Fiber	Ammonia	592.731	CRC	767.774	26
di_p26	High_Fiber	Formate	302.25	CRC	409.199	26
di_p26	High_Fiber	Succinate	250.571	CRC	252.852	26
di_p26	High_Fiber	Trimethylamine	11.1654	CRC	12.5916	26
di_p26	High_Fiber	Hydrogen Sulfide	0.0412921	CRC	1.2075	26
di_p26	High_Fiber	Indole	0.0180443	CRC	1.36363	26
di_p26	High_Fiber	Putrescine	-0.00730202	CRC	-0.029809	26
di_p26	High_Fiber	Butyrate	0.00504567	CRC	148.38	26
di_p26	High_Fiber	Propionate	0	CRC	0	26
di_p26	High_Fiber	Valerate	0	CRC	0	26
di_p26	High_Fiber	Lactate	0	CRC	0	26
di_p26	High_Fiber	Phenol	0	CRC	0	26
di_p26	High_fat	Ammonia	750.332	CRC	572.431	26
di_p26	High_fat	Formate	594.036	CRC	432.101	26
di_p26	High_fat	Acetate	506.643	CRC	725.37	26
di_p26	High_fat	Succinate	460.831	CRC	545.285	26
di_p26	High_fat	Trimethylamine	-93.9072	CRC	0.251808	26
di_p26	High_fat	Indole	-23.6126	CRC	-113.997	26
di_p26	High_fat	Putrescine	-5.58887	CRC	-0.154578	26
di_p26	High_fat	Hydrogen Sulfide	0.0384071	CRC	-3.58459	26
di_p26	High_fat	Butyrate	-2.99674e-73	CRC	117.143	26
di_p26	High_fat	Propionate	0	CRC	0	26
di_p26	High_fat	Valerate	0	CRC	0	26
di_p26	High_fat	Lactate	0	CRC	0	26
di_p26	High_fat	Phenol	0	CRC	0	26
di_p26	High_protein	Ammonia	852.397	CRC	767.19	26
di_p26	High_protein	Succinate	624.415	CRC	589.106	26
di_p26	High_protein	Acetate	583.711	CRC	631.978	26
di_p26	High_protein	Formate	488.306	CRC	583.15	26
di_p26	High_protein	Trimethylamine	193.166	CRC	213.247	26
di_p26	High_protein	Indole	-23.7329	CRC	-120.004	26
di_p26	High_protein	Putrescine	-0.0286023	CRC	0.143971	26
di_p26	High_protein	Hydrogen Sulfide	0.00525369	CRC	1.10394	26
di_p26	High_protein	Butyrate	3.73945e-158	CRC	117.263	26
di_p26	High_protein	Propionate	0	CRC	0	26
di_p26	High_protein	Valerate	0	CRC	0	26
di_p26	High_protein	Lactate	0	CRC	0	26
di_p26	High_protein	Phenol	0	CRC	0	26
di_p26	Mediterranean	Formate	779.131	CRC	496.774	26
di_p26	Mediterranean	Ammonia	741.49	CRC	668.537	26
di_p26	Mediterranean	Acetate	623.618	CRC	773.186	26
di_p26	Mediterranean	Trimethylamine	202.378	CRC	215.621	26
di_p26	Mediterranean	Succinate	-26.0104	CRC	41.1506	26
di_p26	Mediterranean	Indole	-23.7136	CRC	-143.69	26
di_p26	Mediterranean	Putrescine	-0.0202185	CRC	-0.0179431	26
di_p26	Mediterranean	Hydrogen Sulfide	9.00864e-25	CRC	1.13583	26
di_p26	Mediterranean	Butyrate	4.79303e-229	CRC	115.103	26
di_p26	Mediterranean	Propionate	0	CRC	0	26
di_p26	Mediterranean	Valerate	0	CRC	0	26
di_p26	Mediterranean	Lactate	0	CRC	0	26
di_p26	Mediterranean	Phenol	0	CRC	0	26
di_p26	Vegan	Ammonia	869.538	CRC	736.584	26
di_p26	Vegan	Acetate	844.989	CRC	638.555	26
di_p26	Vegan	Succinate	435.837	CRC	593.779	26
di_p26	Vegan	Formate	395.71	CRC	286.501	26
di_p26	Vegan	Trimethylamine	385.024	CRC	250.562	26
di_p26	Vegan	Indole	-31.6654	CRC	-125.309	26
di_p26	Vegan	Putrescine	-0.024073	CRC	0.596456	26
di_p26	Vegan	Hydrogen Sulfide	0.00812013	CRC	0.674618	26
di_p26	Vegan	Butyrate	8.80547e-16	CRC	142.61	26
di_p26	Vegan	Propionate	0	CRC	0	26
di_p26	Vegan	Valerate	0	CRC	0	26
di_p26	Vegan	Lactate	0	CRC	0	26
di_p26	Vegan	Phenol	0	CRC	0	26
di_p27	Gluten_Free	Ammonia	933.088	CRC	710.913	27
di_p27	Gluten_Free	Succinate	607.974	CRC	558.682	27
di_p27	Gluten_Free	Formate	324.031	CRC	301.257	27
di_p27	Gluten_Free	Butyrate	294.022	CRC	119.344	27
di_p27	Gluten_Free	Acetate	160.934	CRC	530.276	27
di_p27	Gluten_Free	Indole	-121.236	CRC	-60.468	27
di_p27	Gluten_Free	Trimethylamine	12.6783	CRC	217.576	27
di_p27	Gluten_Free	Hydrogen Sulfide	2.14874	CRC	11.5365	27
di_p27	Gluten_Free	Putrescine	-0.0247536	CRC	-0.0142275	27
di_p27	Gluten_Free	Propionate	0	CRC	0	27
di_p27	Gluten_Free	Valerate	0	CRC	0	27
di_p27	Gluten_Free	Lactate	0	CRC	0	27
di_p27	Gluten_Free	Phenol	0	CRC	0	27
di_p27	High_Fiber	Acetate	979.582	CRC	949.481	27
di_p27	High_Fiber	Ammonia	901.642	CRC	767.774	27
di_p27	High_Fiber	Succinate	660.225	CRC	252.852	27
di_p27	High_Fiber	Formate	635.614	CRC	409.199	27
di_p27	High_Fiber	Butyrate	514.006	CRC	148.38	27
di_p27	High_Fiber	Indole	3.18666	CRC	1.36363	27
di_p27	High_Fiber	Hydrogen Sulfide	0.730089	CRC	1.2075	27
di_p27	High_Fiber	Trimethylamine	-0.35907	CRC	12.5916	27
di_p27	High_Fiber	Putrescine	-0.0223475	CRC	-0.029809	27
di_p27	High_Fiber	Propionate	0	CRC	0	27
di_p27	High_Fiber	Valerate	0	CRC	0	27
di_p27	High_Fiber	Lactate	0	CRC	0	27
di_p27	High_Fiber	Phenol	0	CRC	0	27
di_p27	High_fat	Acetate	950.087	CRC	725.37	27
di_p27	High_fat	Ammonia	897.873	CRC	572.431	27
di_p27	High_fat	Succinate	792.951	CRC	545.285	27
di_p27	High_fat	Formate	629.021	CRC	432.101	27
di_p27	High_fat	Butyrate	288.933	CRC	117.143	27
di_p27	High_fat	Indole	-260.255	CRC	-113.997	27
di_p27	High_fat	Hydrogen Sulfide	-4.71198	CRC	-3.58459	27
di_p27	High_fat	Trimethylamine	-3.5657	CRC	0.251808	27
di_p27	High_fat	Putrescine	-0.00483765	CRC	-0.154578	27
di_p27	High_fat	Propionate	0	CRC	0	27
di_p27	High_fat	Valerate	0	CRC	0	27
di_p27	High_fat	Lactate	0	CRC	0	27
di_p27	High_fat	Phenol	0	CRC	0	27
di_p27	High_protein	Ammonia	938.506	CRC	767.19	27
di_p27	High_protein	Succinate	690.577	CRC	589.106	27
di_p27	High_protein	Formate	531.015	CRC	583.15	27
di_p27	High_protein	Butyrate	286.692	CRC	117.263	27
di_p27	High_protein	Acetate	275.259	CRC	631.978	27
di_p27	High_protein	Indole	-266.017	CRC	-120.004	27
di_p27	High_protein	Trimethylamine	12.1693	CRC	213.247	27
di_p27	High_protein	Hydrogen Sulfide	1.72271	CRC	1.10394	27
di_p27	High_protein	Putrescine	-0.00930638	CRC	0.143971	27
di_p27	High_protein	Propionate	0	CRC	0	27
di_p27	High_protein	Valerate	0	CRC	0	27
di_p27	High_protein	Lactate	0	CRC	0	27
di_p27	High_protein	Phenol	0	CRC	0	27
di_p27	Mediterranean	Ammonia	932.455	CRC	668.537	27
di_p27	Mediterranean	Indole	-667.83	CRC	-143.69	27
di_p27	Mediterranean	Succinate	640.462	CRC	41.1506	27
di_p27	Mediterranean	Acetate	503.858	CRC	773.186	27
di_p27	Mediterranean	Butyrate	283.295	CRC	115.103	27
di_p27	Mediterranean	Formate	-53.6428	CRC	496.774	27
di_p27	Mediterranean	Trimethylamine	12.6783	CRC	215.621	27
di_p27	Mediterranean	Hydrogen Sulfide	1.92952	CRC	1.13583	27
di_p27	Mediterranean	Putrescine	-0.0314037	CRC	-0.0179431	27
di_p27	Mediterranean	Propionate	0	CRC	0	27
di_p27	Mediterranean	Valerate	0	CRC	0	27
di_p27	Mediterranean	Lactate	0	CRC	0	27
di_p27	Mediterranean	Phenol	0	CRC	0	27
di_p27	Vegan	Ammonia	781.57	CRC	736.584	27
di_p27	Vegan	Indole	-602.578	CRC	-125.309	27
di_p27	Vegan	Succinate	563.5	CRC	593.779	27
di_p27	Vegan	Butyrate	298.098	CRC	142.61	27
di_p27	Vegan	Formate	-160.287	CRC	286.501	27
di_p27	Vegan	Acetate	-126.684	CRC	638.555	27
di_p27	Vegan	Trimethylamine	16.4164	CRC	250.562	27
di_p27	Vegan	Hydrogen Sulfide	0.845879	CRC	0.674618	27
di_p27	Vegan	Putrescine	-0.0308088	CRC	0.596456	27
di_p27	Vegan	Propionate	0	CRC	0	27
di_p27	Vegan	Valerate	0	CRC	0	27
di_p27	Vegan	Lactate	0	CRC	0	27
di_p27	Vegan	Phenol	0	CRC	0	27
di_p28	Gluten_Free	Ammonia	989.849	CRC	710.913	28
di_p28	Gluten_Free	Succinate	920.138	CRC	558.682	28
di_p28	Gluten_Free	Formate	836.385	CRC	301.257	28
di_p28	Gluten_Free	Trimethylamine	831.274	CRC	217.576	28
di_p28	Gluten_Free	Acetate	270.132	CRC	530.276	28
di_p28	Gluten_Free	Butyrate	5.68263	CRC	119.344	28
di_p28	Gluten_Free	Indole	-2.24346	CRC	-60.468	28
di_p28	Gluten_Free	Putrescine	-0.00503255	CRC	-0.0142275	28
di_p28	Gluten_Free	Hydrogen Sulfide	-3.58445e-162	CRC	11.5365	28
di_p28	Gluten_Free	Propionate	0	CRC	0	28
di_p28	Gluten_Free	Valerate	0	CRC	0	28
di_p28	Gluten_Free	Lactate	0	CRC	0	28
di_p28	Gluten_Free	Phenol	0	CRC	0	28
di_p28	High_Fiber	Acetate	978.133	CRC	949.481	28
di_p28	High_Fiber	Ammonia	933.401	CRC	767.774	28
di_p28	High_Fiber	Formate	780.479	CRC	409.199	28
di_p28	High_Fiber	Succinate	-284.189	CRC	252.852	28
di_p28	High_Fiber	Butyrate	5.68947	CRC	148.38	28
di_p28	High_Fiber	Trimethylamine	5.23043	CRC	12.5916	28
di_p28	High_Fiber	Putrescine	-0.045443	CRC	-0.029809	28
di_p28	High_Fiber	Indole	0.0311301	CRC	1.36363	28
di_p28	High_Fiber	Hydrogen Sulfide	7.92483e-136	CRC	1.2075	28
di_p28	High_Fiber	Propionate	0	CRC	0	28
di_p28	High_Fiber	Valerate	0	CRC	0	28
di_p28	High_Fiber	Lactate	0	CRC	0	28
di_p28	High_Fiber	Phenol	0	CRC	0	28
di_p28	High_fat	Ammonia	977.596	CRC	572.431	28
di_p28	High_fat	Acetate	975.014	CRC	725.37	28
di_p28	High_fat	Formate	859.511	CRC	432.101	28
di_p28	High_fat	Succinate	598.069	CRC	545.285	28
di_p28	High_fat	Butyrate	5.61159	CRC	117.143	28
di_p28	High_fat	Indole	-4.99751	CRC	-113.997	28
di_p28	High_fat	Trimethylamine	-0.61049	CRC	0.251808	28
di_p28	High_fat	Putrescine	0.099552	CRC	-0.154578	28
di_p28	High_fat	Hydrogen Sulfide	-5.1342e-49	CRC	-3.58459	28
di_p28	High_fat	Propionate	0	CRC	0	28
di_p28	High_fat	Valerate	0	CRC	0	28
di_p28	High_fat	Lactate	0	CRC	0	28
di_p28	High_fat	Phenol	0	CRC	0	28
di_p28	High_protein	Ammonia	994.965	CRC	767.19	28
di_p28	High_protein	Succinate	914.58	CRC	589.106	28
di_p28	High_protein	Formate	883.708	CRC	583.15	28
di_p28	High_protein	Trimethylamine	805.208	CRC	213.247	28
di_p28	High_protein	Acetate	495.381	CRC	631.978	28
di_p28	High_protein	Butyrate	5.53138	CRC	117.263	28
di_p28	High_protein	Indole	-5.05867	CRC	-120.004	28
di_p28	High_protein	Putrescine	0.108026	CRC	0.143971	28
di_p28	High_protein	Hydrogen Sulfide	-5.50654e-124	CRC	1.10394	28
di_p28	High_protein	Propionate	0	CRC	0	28
[truncated: 29 more rows]

## Sheet: S5 Species differential abundan
diet	Species	.y.	group1	group2	n1	n2	statistic	p	p.adj
Gluten_Free	Acidaminococcus fermentans DSM 20731	RelAbundance	CRC	Healthy	10	34	104	0.066	0.123632
Gluten_Free	Acidaminococcus intestini RyC MR95	RelAbundance	CRC	Healthy	18	56	284	0.00568	0.0208808
Gluten_Free	Acidaminococcus massiliensis Marseille P2828	RelAbundance	CRC	Healthy	24	79	541	0.00152	0.00757058
Gluten_Free	Acinetobacter baumannii 1656 2	RelAbundance	CRC	Healthy	8	18	49	0.216	0.337555
Gluten_Free	Alcaligenes faecalis NBIB 017	RelAbundance	CRC	Healthy	25	87	924	0.255	0.385245
Gluten_Free	Alistipes finegoldii DSM 17242	RelAbundance	CRC	Healthy	24	95	717	0.00514	0.0196954
Gluten_Free	Alistipes indistinctus ERR2221377	RelAbundance	CRC	Healthy	21	81	307	6.99e-06	0.000204856
Gluten_Free	Alistipes senegalensis JC50	RelAbundance	CRC	Healthy	24	68	600	0.0553	0.110286
Gluten_Free	Alistipes shahii ERR2221103	RelAbundance	CRC	Healthy	25	83	977	0.662	0.748436
Gluten_Free	Alloprevotella rava F0323	RelAbundance	CRC	Healthy	19	46	226	0.00194	0.00941937
Gluten_Free	Anaerofustis stercorihominis DSM 17244	RelAbundance	CRC	Healthy	26	102	1240	0.613	0.722498
Gluten_Free	Anaerostipes hadrus DSM 3319	RelAbundance	CRC	Healthy	17	70	357	0.011	0.0341044
Gluten_Free	Anaerotruncus colihominis DSM 17241	RelAbundance	CRC	Healthy	20	53	380	0.0644	0.122758
Gluten_Free	Ardenticatena maritima 110S	RelAbundance	CRC	Healthy	22	63	512	0.0701	0.129777
Gluten_Free	Auritidibacter ignavus IMMIB L 1656	RelAbundance	CRC	Healthy	26	103	1087	0.14	0.238062
Gluten_Free	Bacillus cereus 03BB102	RelAbundance	CRC	Healthy	11	29	180	0.55	0.689286
Gluten_Free	Bacteroides acidifaciens 1e8A	RelAbundance	CRC	Healthy	24	79	577	0.00385	0.0161871
Gluten_Free	Bacteroides caccae ATCC 43185	RelAbundance	CRC	Healthy	25	99	876	0.0246	0.0589789
Gluten_Free	Bacteroides cellulosilyticus CL02T12C19	RelAbundance	CRC	Healthy	23	83	1045	0.49	0.633635
Gluten_Free	Bacteroides coprocola M16 DSM 17136	RelAbundance	CRC	Healthy	24	95	1086	0.723	0.800798
Gluten_Free	Bacteroides coprophilus DSM 18228	RelAbundance	CRC	Healthy	24	90	253	9.22e-09	1.01683e-06
Gluten_Free	Bacteroides dorei CL02T00C15	RelAbundance	CRC	Healthy	26	102	965	0.0328	0.0723474
Gluten_Free	Bacteroides eggerthii 1 2 48FAA	RelAbundance	CRC	Healthy	26	86	1491	0.0103	0.0327226
Gluten_Free	Bacteroides faecis ERR1022362	RelAbundance	CRC	Healthy	25	100	976	0.0914	0.164095
Gluten_Free	Bacteroides fragilis 3 1 12	RelAbundance	CRC	Healthy	26	104	1570	0.206	0.325885
Gluten_Free	Bacteroides gallinarum DSM 18171 JCM 13658	RelAbundance	CRC	Healthy	22	55	436	0.0574	0.110698
Gluten_Free	Bacteroides helcogenes P 36 108	RelAbundance	CRC	Healthy	21	49	282	0.00249	0.0117931
Gluten_Free	Bacteroides nordii CL02T12C05	RelAbundance	CRC	Healthy	25	95	1014	0.264	0.391938
Gluten_Free	Bacteroides ovatus 3 8 47FAA	RelAbundance	CRC	Healthy	26	104	1557	0.234	0.360575
Gluten_Free	Bacteroides salanitronis DSM 18170	RelAbundance	CRC	Healthy	23	84	533	0.00104	0.00557556
Gluten_Free	Bacteroides salyersiae CL02T12C01	RelAbundance	CRC	Healthy	25	102	879	0.0165	0.0459856
Gluten_Free	Bacteroides stercoris ATCC 43183	RelAbundance	CRC	Healthy	26	98	1438	0.316	0.450096
Gluten_Free	Bacteroides thetaiotaomicron 3731	RelAbundance	CRC	Healthy	26	103	924	0.015	0.0430483
Gluten_Free	Bacteroides uniformis ATCC 8492	RelAbundance	CRC	Healthy	26	103	1178	0.346	0.482152
Gluten_Free	Bacteroides vulgatus ATCC 8482	RelAbundance	CRC	Healthy	26	103	1443	0.543	0.688335
Gluten_Free	Bacteroides xylanisolvens CL03T12C04	RelAbundance	CRC	Healthy	26	104	1036	0.0663	0.123632
Gluten_Free	Barnesiella intestinihominis ERR1203957	RelAbundance	CRC	Healthy	22	81	450	0.000393	0.00303396
Gluten_Free	Barnesiella viscericola DSM 18177	RelAbundance	CRC	Healthy	21	49	346	0.0305	0.0694572
Gluten_Free	Bifidobacterium adolescentis ATCC 15703	RelAbundance	CRC	Healthy	14	91	337	0.00475	0.0185202
Gluten_Free	Bifidobacterium catenulatum DSM 16992	RelAbundance	CRC	Healthy	17	73	241	9.35e-05	0.00111049
Gluten_Free	Bifidobacterium longum BG7	RelAbundance	CRC	Healthy	26	100	752	0.000965	0.00536567
Gluten_Free	Bifidobacterium pseudocatenulatum DSM 20438	RelAbundance	CRC	Healthy	14	67	201	0.000834	0.00519232
Gluten_Free	Blautia coccoides YL58	RelAbundance	CRC	Healthy	24	74	604	0.0192	0.0499071
Gluten_Free	Blautia hansenii VPI C7 24 DSM 20583	RelAbundance	CRC	Healthy	15	45	293	0.457	0.602055
Gluten_Free	Blautia luti DSM 14534	RelAbundance	CRC	Healthy	22	78	404	0.000161	0.00167962
Gluten_Free	Blautia obeum ATCC 29174	RelAbundance	CRC	Healthy	26	93	634	0.00022	0.00217744
Gluten_Free	Blautia torques ERR1022291	RelAbundance	CRC	Healthy	24	88	980	0.592	0.708564
Gluten_Free	Blautia wexlerae AGR2146	RelAbundance	CRC	Healthy	26	96	555	1.49e-05	0.000338318
Gluten_Free	Catenibacterium mitsuokai DSM 15897	RelAbundance	CRC	Healthy	17	51	221	0.00268	0.0122424
Gluten_Free	Citrobacter freundii 4 7 47CFAA	RelAbundance	CRC	Healthy	10	23	100	0.576	0.703595
Gluten_Free	Clostridioides difficile 002 P50 2011	RelAbundance	CRC	Healthy	22	68	493	0.0169	0.0464299
Gluten_Free	Clostridium acetobutylicum ATCC 824	RelAbundance	CRC	Healthy	22	71	543	0.0318	0.0709526
Gluten_Free	Clostridium baratii 796 15	RelAbundance	CRC	Healthy	2	7	0	0.0556	0.110286
Gluten_Free	Clostridium beijerinckii G117	RelAbundance	CRC	Healthy	3	9	5	0.145	0.24441
Gluten_Free	Clostridium botulinum A2 str Kyoto	RelAbundance	CRC	Healthy	11	24	55	0.00523	0.0196954
Gluten_Free	Clostridium butyricum 5521	RelAbundance	CRC	Healthy	3	8	0	0.0121	0.0360664
Gluten_Free	Clostridium hathewayi 12489931	RelAbundance	CRC	Healthy	25	61	914	0.151	0.251775
Gluten_Free	Clostridium perfringens ATCC 13124	RelAbundance	CRC	Healthy	20	48	305	0.018	0.0484181
Gluten_Free	Clostridium scindens ATCC 35704	RelAbundance	CRC	Healthy	26	78	908	0.428	0.572645
Gluten_Free	Collinsella aerofaciens ATCC 25986	RelAbundance	CRC	Healthy	25	92	708	0.00333	0.0146066
Gluten_Free	Comamonas aquatica CJG	RelAbundance	CRC	Healthy	5	20	42	0.621	0.727484
Gluten_Free	Coprobacter fastidiosus NSB1	RelAbundance	CRC	Healthy	14	30	80	0.000703	0.00456064
Gluten_Free	Coprococcus catus ERR2221258	RelAbundance	CRC	Healthy	26	90	631	0.000364	0.00289699
Gluten_Free	Coprococcus comes ATCC 27758	RelAbundance	CRC	Healthy	25	97	933	0.0768	0.140497
Gluten_Free	Coprococcus eutactus ATCC 27759	RelAbundance	CRC	Healthy	16	78	362	0.00852	0.0293087
Gluten_Free	Cronobacter sakazakii 2151	RelAbundance	CRC	Healthy	1	9	0	0.2	0.319669
Gluten_Free	Dialister succinatiphilus YIT 11850	RelAbundance	CRC	Healthy	23	74	425	0.000307	0.00254843
Gluten_Free	Dielma fastidiosa JC13	RelAbundance	CRC	Healthy	22	85	1055	0.357	0.49215
Gluten_Free	Dorea formicigenerans 4 6 53AFAA	RelAbundance	CRC	Healthy	26	91	837	0.0235	0.0574114
Gluten_Free	Dorea longicatena DSM 13814	RelAbundance	CRC	Healthy	25	100	586	4.22e-05	0.000651568
Gluten_Free	Eisenbergiella nov ERR2221109	RelAbundance	CRC	Healthy	22	59	524	0.186	0.303577
Gluten_Free	Enterobacter aerogenes EA1509E	RelAbundance	CRC	Healthy	2	5	3	0.571	0.70193
Gluten_Free	Enterobacter cloacae ERR2221114	RelAbundance	CRC	Healthy	10	45	216	0.855	0.887177
Gluten_Free	Enterobacter hormaechei ATCC 49162	RelAbundance	CRC	Healthy	14	62	393	0.587	0.708168
Gluten_Free	Enterobacter roggenkampii 35734	RelAbundance	CRC	Healthy	8	41	123	0.279	0.410263
Gluten_Free	Escherichia coli 042	RelAbundance	CRC	Healthy	26	104	1547	0.258	0.38675
Gluten_Free	Eubacterium biforme DSM 3989	RelAbundance	CRC	Healthy	16	42	209	0.0267	0.0618991
Gluten_Free	Eubacterium eligens ATCC 27750	RelAbundance	CRC	Healthy	23	97	521	7.48e-05	0.000962427
Gluten_Free	Eubacterium hallii DSM 3353	RelAbundance	CRC	Healthy	24	82	457	7.05e-05	0.000938379
Gluten_Free	Eubacterium ramulus ATCC 29099	RelAbundance	CRC	Healthy	24	73	470	0.000699	0.00456064
Gluten_Free	Eubacterium ventriosum ATCC 27560	RelAbundance	CRC	Healthy	15	56	219	0.00474	0.0185202
Gluten_Free	Faecalibacterium cf ERR1022328	RelAbundance	CRC	Healthy	24	100	491	7.43e-06	0.000204856
Gluten_Free	Faecalibacterium prausnitzii A2 165	RelAbundance	CRC	Healthy	26	104	462	2.25e-07	1.737e-05
Gluten_Free	Flavonifractor plautii ATCC 29863	RelAbundance	CRC	Healthy	26	93	1544	0.0315	0.070898
Gluten_Free	Haemophilus parainfluenzae 215035 2 ISO5	RelAbundance	CRC	Healthy	12	77	248	0.0103	0.0327226
Gluten_Free	Intestinimonas butyriciproducens AF211	RelAbundance	CRC	Healthy	22	81	948	0.649	0.741166
Gluten_Free	Klebsiella pneumoniae 1162281	RelAbundance	CRC	Healthy	24	103	570	4.16e-05	0.000651568
Gluten_Free	Klebsiella quasipneumoniae 700603	RelAbundance	CRC	Healthy	12	46	110	0.000975	0.00536567
Gluten_Free	Klebsiella variicola KV321 ZB100000	RelAbundance	CRC	Healthy	9	45	103	0.0197	0.0503589
Gluten_Free	Kluyvera ascorbata ATCC 33433	RelAbundance	CRC	Healthy	4	5	10	1	1
Gluten_Free	Lactobacillus ruminis ATCC 25644	RelAbundance	CRC	Healthy	11	69	164	0.00267	0.0122424
Gluten_Free	Megasphaera elsdenii DSM 20460	RelAbundance	CRC	Healthy	17	71	270	0.000432	0.00320677
Gluten_Free	Muribaculum intestinale YL27	RelAbundance	CRC	Healthy	21	46	381	0.171	0.280877
Gluten_Free	Odoribacter splanchnicus 1651 6 DSM 20712	RelAbundance	CRC	Healthy	25	96	1499	0.056	0.110286
Gluten_Free	Oscillibacter nov ERR1022355	RelAbundance	CRC	Healthy	22	82	755	0.244	0.372269
Gluten_Free	Parabacteroides chinchillae DSM 29073	RelAbundance	CRC	Healthy	22	54	398	0.0251	0.0594393
Gluten_Free	Parabacteroides distasonis ATCC 8503	RelAbundance	CRC	Healthy	25	104	1695	0.0187	0.049271
Gluten_Free	Parabacteroides goldsteinii CL02T12C30	RelAbundance	CRC	Healthy	25	80	1039	0.772	0.833544
Gluten_Free	Parabacteroides johnsonii CL02T12C29	RelAbundance	CRC	Healthy	24	74	911	0.853	0.887177
Gluten_Free	Parabacteroides merdae ATCC 43184	RelAbundance	CRC	Healthy	26	90	1326	0.303	0.438045
Gluten_Free	Paraprevotella clara YIT 11840	RelAbundance	CRC	Healthy	24	85	705	0.0215	0.0537152
Gluten_Free	Paraprevotella xylaniphila YIT 11841	RelAbundance	CRC	Healthy	24	73	536	0.00454	0.0182546
Gluten_Free	Phascolarctobacterium faecium DSM 14760	RelAbundance	CRC	Healthy	10	15	51	0.196	0.317216
Gluten_Free	Phascolarctobacterium succinatutens YIT 12067	RelAbundance	CRC	Healthy	7	9	13	0.0549	0.110286
Gluten_Free	Prevotella baroniae DSM 16972 JCM 13447	RelAbundance	CRC	Healthy	19	79	233	3.39e-06	0.000155558
Gluten_Free	Prevotella bivia DSM 20514	RelAbundance	CRC	Healthy	21	63	427	0.0156	0.0442765
Gluten_Free	Prevotella bryantii B14	RelAbundance	CRC	Healthy	20	79	410	0.000942	0.00536567
Gluten_Free	Prevotella buccalis ATCC 35310	RelAbundance	CRC	Healthy	22	81	631	0.0368	0.078697
Gluten_Free	Prevotella copri CB7 DSM 18205	RelAbundance	CRC	Healthy	26	101	541	4.03e-06	0.000155558
Gluten_Free	Prevotella corporis DSM 18810	RelAbundance	CRC	Healthy	20	78	590	0.0948	0.168243
Gluten_Free	Prevotella dentalis DSM 3688	RelAbundance	CRC	Healthy	22	74	512	0.00858	0.0293087
Gluten_Free	Prevotella denticola CRIS 18C A	RelAbundance	CRC	Healthy	21	76	468	0.0039	0.0161871
Gluten_Free	Prevotella enoeca JCM 12259	RelAbundance	CRC	Healthy	20	55	265	0.000653	0.0044612
Gluten_Free	Prevotella histicola F0411	RelAbundance	CRC	Healthy	14	49	132	0.000285	0.00254843
Gluten_Free	Prevotella intermedia 17	RelAbundance	CRC	Healthy	22	83	643	0.0338	0.0739195
Gluten_Free	Prevotella melaninogenica ATCC 25845	RelAbundance	CRC	Healthy	23	85	639	0.0112	0.0341755
Gluten_Free	Prevotella multiformis DSM 16608	RelAbundance	CRC	Healthy	20	68	332	0.00054	0.00382459
Gluten_Free	Prevotella nigrescens ATCC 33563	RelAbundance	CRC	Healthy	19	61	411	0.0575	0.110698
Gluten_Free	Prevotella oris C735	RelAbundance	CRC	Healthy	20	66	305	0.00029	0.00254843
Gluten_Free	Prevotella ruminicola 23	RelAbundance	CRC	Healthy	21	78	513	0.00893	0.0299737
Gluten_Free	Prevotella sp C561	RelAbundance	CRC	Healthy	25	93	549	5.41e-05	0.00077343
Gluten_Free	Prevotella veroralis DSM 19559	RelAbundance	CRC	Healthy	17	64	232	0.000303	0.00254843
Gluten_Free	Pseudomonas aeruginosa 152504	RelAbundance	CRC	Healthy	1	2	0	0.667	0.748436
Gluten_Free	Roseburia faecis ERR1022321	RelAbundance	CRC	Healthy	26	101	299	1.4e-09	3.60267e-07
Gluten_Free	Roseburia hominis A2 183	RelAbundance	CRC	Healthy	26	93	691	0.000875	0.0053189
Gluten_Free	Roseburia intestinalis ERR1022474	RelAbundance	CRC	Healthy	26	102	611	2.32e-05	0.000471326
Gluten_Free	Ruminococcus albus 7	RelAbundance	CRC	Healthy	19	71	615	0.56	0.69729
Gluten_Free	Ruminococcus bicirculans 80 3	RelAbundance	CRC	Healthy	22	68	439	0.00377	0.0161871
Gluten_Free	Ruminococcus champanellensis 18P13	RelAbundance	CRC	Healthy	18	45	392	0.851	0.887177
Gluten_Free	Ruminococcus lactaris ATCC 29176	RelAbundance	CRC	Healthy	23	69	364	0.00011	0.00121314
Gluten_Free	Ruthenibacterium lactatiformans 585 1	RelAbundance	CRC	Healthy	23	73	1224	0.00098	0.00536567
Gluten_Free	Salmonella enterica enterica sv Typhimurium LT2	RelAbundance	CRC	Healthy	25	95	870	0.0405	0.0854262
Gluten_Free	Selenomonas ruminantium AC2024	RelAbundance	CRC	Healthy	7	29	46	0.0255	0.0596545
Gluten_Free	Selenomonas sputigena ATCC 35185	RelAbundance	CRC	Healthy	13	30	76	0.00117	0.00610297
Gluten_Free	Staphylococcus aureus 04 02981	RelAbundance	CRC	Healthy	12	39	144	0.0459	0.0947455
Gluten_Free	Streptococcus pleomorphus DSM 20574	RelAbundance	CRC	Healthy	21	66	529	0.105	0.184647
Gluten_Free	Streptococcus salivarius 57 I	RelAbundance	CRC	Healthy	9	57	231	0.64	0.737433
Gluten_Free	Subdoligranulum sp 4 3 54A2FAA	RelAbundance	CRC	Healthy	19	71	411	0.00931	0.030715
Gluten_Free	Subdoligranulum variabile DSM 15176	RelAbundance	CRC	Healthy	19	69	413	0.0141	0.0413886
Gluten_Free	Succinivibrio dextrinosolvens H5	RelAbundance	CRC	Healthy	9	15	16	0.00128	0.00650105
Gluten_Free	Sutterella wadsworthensis 2 1 59BFAA	RelAbundance	CRC	Healthy	19	52	155	1.1e-05	0.000273935
High_Fiber	Acidaminococcus fermentans DSM 20731	RelAbundance	CRC	Healthy	10	34	106	0.0751	0.13837
High_Fiber	Acidaminococcus intestini RyC MR95	RelAbundance	CRC	Healthy	18	56	291	0.00742	0.026433
High_Fiber	Acidaminococcus massiliensis Marseille P2828	RelAbundance	CRC	Healthy	24	79	1039.5	0.478	0.624393
High_Fiber	Acinetobacter baumannii 1656 2	RelAbundance	CRC	Healthy	8	18	63	0.644	0.738734
High_Fiber	Alcaligenes faecalis NBIB 017	RelAbundance	CRC	Healthy	25	87	944	0.318	0.45211
High_Fiber	Alistipes finegoldii DSM 17242	RelAbundance	CRC	Healthy	24	95	1144.5	0.979	0.990262
High_Fiber	Alistipes indistinctus ERR2221377	RelAbundance	CRC	Healthy	21	81	786	0.596	0.711147
High_Fiber	Alistipes senegalensis JC50	RelAbundance	CRC	Healthy	24	68	940	0.272	0.40304
High_Fiber	Alistipes shahii ERR2221103	RelAbundance	CRC	Healthy	25	83	862	0.202	0.322198
High_Fiber	Alloprevotella rava F0323	RelAbundance	CRC	Healthy	19	46	409	0.692	0.773117
High_Fiber	Anaerofustis stercorihominis DSM 17244	RelAbundance	CRC	Healthy	26	102	1459	0.433	0.578332
High_Fiber	Anaerostipes hadrus DSM 3319	RelAbundance	CRC	Healthy	17	70	727	0.159	0.262844
High_Fiber	Anaerotruncus colihominis DSM 17241	RelAbundance	CRC	Healthy	20	53	523	0.936	0.959618
High_Fiber	Ardenticatena maritima 110S	RelAbundance	CRC	Healthy	22	63	966	0.00625	0.0227594
High_Fiber	Auritidibacter ignavus IMMIB L 1656	RelAbundance	CRC	Healthy	26	103	1469	0.447	0.594972
High_Fiber	Bacillus cereus 03BB102	RelAbundance	CRC	Healthy	11	29	193	0.323	0.457534
High_Fiber	Bacteroides acidifaciens 1e8A	RelAbundance	CRC	Healthy	24	79	744	0.112	0.19562
High_Fiber	Bacteroides caccae ATCC 43185	RelAbundance	CRC	Healthy	25	99	864	0.0202	0.0514667
High_Fiber	Bacteroides cellulosilyticus CL02T12C19	RelAbundance	CRC	Healthy	23	83	1010	0.673	0.75298
High_Fiber	Bacteroides coprocola M16 DSM 17136	RelAbundance	CRC	Healthy	24	95	1264	0.413	0.556433
High_Fiber	Bacteroides coprophilus DSM 18228	RelAbundance	CRC	Healthy	24	90	1085	0.975	0.989093
High_Fiber	Bacteroides dorei CL02T00C15	RelAbundance	CRC	Healthy	26	102	950	0.0262	0.0611069
High_Fiber	Bacteroides eggerthii 1 2 48FAA	RelAbundance	CRC	Healthy	26	86	1462	0.0179	0.0484181
High_Fiber	Bacteroides faecis ERR1022362	RelAbundance	CRC	Healthy	25	100	1164.5	0.6	0.713713
High_Fiber	Bacteroides fragilis 3 1 12	RelAbundance	CRC	Healthy	26	104	1535	0.288	0.420295
High_Fiber	Bacteroides gallinarum DSM 18171 JCM 13658	RelAbundance	CRC	Healthy	22	55	573.5	0.727	0.801777
High_Fiber	Bacteroides helcogenes P 36 108	RelAbundance	CRC	Healthy	21	49	586	0.363	0.499529
High_Fiber	Bacteroides nordii CL02T12C05	RelAbundance	CRC	Healthy	25	95	1004	0.237	0.36447
High_Fiber	Bacteroides ovatus 3 8 47FAA	RelAbundance	CRC	Healthy	26	104	1527	0.31	0.447327
High_Fiber	Bacteroides salanitronis DSM 18170	RelAbundance	CRC	Healthy	23	84	1172.5	0.118	0.205171
High_Fiber	Bacteroides salyersiae CL02T12C01	RelAbundance	CRC	Healthy	25	102	901	0.0235	0.0574114
High_Fiber	Bacteroides stercoris ATCC 43183	RelAbundance	CRC	Healthy	26	98	1408	0.413	0.556433
High_Fiber	Bacteroides thetaiotaomicron 3731	RelAbundance	CRC	Healthy	26	103	985	0.0379	0.0808254
High_Fiber	Bacteroides uniformis ATCC 8492	RelAbundance	CRC	Healthy	26	103	1144	0.253	0.385239
High_Fiber	Bacteroides vulgatus ATCC 8482	RelAbundance	CRC	Healthy	26	103	1359	0.909	0.935664
High_Fiber	Bacteroides xylanisolvens CL03T12C04	RelAbundance	CRC	Healthy	26	104	1050	0.0793	0.144727
High_Fiber	Barnesiella intestinihominis ERR1203957	RelAbundance	CRC	Healthy	22	81	1013	0.328	0.462918
High_Fiber	Barnesiella viscericola DSM 18177	RelAbundance	CRC	Healthy	21	49	498	0.839	0.886057
High_Fiber	Bifidobacterium adolescentis ATCC 15703	RelAbundance	CRC	Healthy	14	91	533	0.329	0.463482
High_Fiber	Bifidobacterium catenulatum DSM 16992	RelAbundance	CRC	Healthy	17	73	525	0.327	0.462352
High_Fiber	Bifidobacterium longum BG7	RelAbundance	CRC	Healthy	26	100	764	0.00125	0.00647651
High_Fiber	Bifidobacterium pseudocatenulatum DSM 20438	RelAbundance	CRC	Healthy	14	67	403	0.413	0.556433
High_Fiber	Blautia coccoides YL58	RelAbundance	CRC	Healthy	24	74	1018	0.285	0.416705
High_Fiber	Blautia hansenii VPI C7 24 DSM 20583	RelAbundance	CRC	Healthy	15	45	330	0.906	0.933821
High_Fiber	Blautia luti DSM 14534	RelAbundance	CRC	Healthy	22	78	819.5	0.752	0.8223
High_Fiber	Blautia obeum ATCC 29174	RelAbundance	CRC	Healthy	26	93	1287	0.618	0.72728
High_Fiber	Blautia torques ERR1022291	RelAbundance	CRC	Healthy	24	88	1123	0.637	0.737433
High_Fiber	Blautia wexlerae AGR2146	RelAbundance	CRC	Healthy	26	96	1349	0.53	0.677417
High_Fiber	Catenibacterium mitsuokai DSM 15897	RelAbundance	CRC	Healthy	17	51	415	0.799	0.856706
High_Fiber	Citrobacter freundii 4 7 47CFAA	RelAbundance	CRC	Healthy	10	23	101	0.603	0.716178
High_Fiber	Clostridioides difficile 002 P50 2011	RelAbundance	CRC	Healthy	22	68	515	0.029	0.066631
High_Fiber	Clostridium acetobutylicum ATCC 824	RelAbundance	CRC	Healthy	22	71	656	0.26	0.388992
High_Fiber	Clostridium baratii 796 15	RelAbundance	CRC	Healthy	2	7	14	0.0556	0.110286
High_Fiber	Clostridium beijerinckii G117	RelAbundance	CRC	Healthy	3	9	2	0.0364	0.078697
High_Fiber	Clostridium botulinum A2 str Kyoto	RelAbundance	CRC	Healthy	11	24	64	0.0148	0.0430483
High_Fiber	Clostridium butyricum 5521	RelAbundance	CRC	Healthy	3	8	0	0.0121	0.0360664
High_Fiber	Clostridium hathewayi 12489931	RelAbundance	CRC	Healthy	25	61	999.5	0.0245	0.0589789
High_Fiber	Clostridium perfringens ATCC 13124	RelAbundance	CRC	Healthy	20	48	455	0.744	0.817024
High_Fiber	Clostridium scindens ATCC 35704	RelAbundance	CRC	Healthy	26	78	949	0.628	0.733458
High_Fiber	Collinsella aerofaciens ATCC 25986	RelAbundance	CRC	Healthy	25	92	970	0.233	0.360575
High_Fiber	Comamonas aquatica CJG	RelAbundance	CRC	Healthy	5	20	44	0.717	0.797585
High_Fiber	Coprobacter fastidiosus NSB1	RelAbundance	CRC	Healthy	14	30	161	0.225	0.350909
High_Fiber	Coprococcus catus ERR2221258	RelAbundance	CRC	Healthy	26	90	1161	0.955	0.972639
High_Fiber	Coprococcus comes ATCC 27758	RelAbundance	CRC	Healthy	25	97	976	0.134	0.230396
High_Fiber	Coprococcus eutactus ATCC 27759	RelAbundance	CRC	Healthy	16	78	352	0.00631	0.02287
High_Fiber	Cronobacter sakazakii 2151	RelAbundance	CRC	Healthy	1	9	0	0.2	0.319669
High_Fiber	Dialister succinatiphilus YIT 11850	RelAbundance	CRC	Healthy	23	74	1076	0.0569	0.110698
High_Fiber	Dielma fastidiosa JC13	RelAbundance	CRC	Healthy	22	85	1138	0.119	0.206445
High_Fiber	Dorea formicigenerans 4 6 53AFAA	RelAbundance	CRC	Healthy	26	91	825	0.0191	0.0499071
High_Fiber	Dorea longicatena DSM 13814	RelAbundance	CRC	Healthy	25	100	590	4.69e-05	0.000709937
High_Fiber	Eisenbergiella nov ERR2221109	RelAbundance	CRC	Healthy	22	59	600	0.607	0.719822
High_Fiber	Enterobacter aerogenes EA1509E	RelAbundance	CRC	Healthy	2	5	3	0.571	0.70193
High_Fiber	Enterobacter cloacae ERR2221114	RelAbundance	CRC	Healthy	10	45	210	0.755	0.824413
High_Fiber	Enterobacter hormaechei ATCC 49162	RelAbundance	CRC	Healthy	14	62	391	0.569	0.70193
High_Fiber	Enterobacter roggenkampii 35734	RelAbundance	CRC	Healthy	8	41	101	0.0912	0.164095
High_Fiber	Escherichia coli 042	RelAbundance	CRC	Healthy	26	104	1512	0.353	0.490137
High_Fiber	Eubacterium biforme DSM 3989	RelAbundance	CRC	Healthy	16	42	351	0.803	0.859436
High_Fiber	Eubacterium eligens ATCC 27750	RelAbundance	CRC	Healthy	23	97	1197.5	0.587	0.708168
High_Fiber	Eubacterium hallii DSM 3353	RelAbundance	CRC	Healthy	24	82	464	8.79e-05	0.0010945
High_Fiber	Eubacterium ramulus ATCC 29099	RelAbundance	CRC	Healthy	24	73	961	0.48	0.625946
High_Fiber	Eubacterium ventriosum ATCC 27560	RelAbundance	CRC	Healthy	15	56	522	0.153	0.25456
High_Fiber	Faecalibacterium cf ERR1022328	RelAbundance	CRC	Healthy	24	100	1232	0.842	0.887177
High_Fiber	Faecalibacterium prausnitzii A2 165	RelAbundance	CRC	Healthy	26	104	1364	0.947	0.967042
High_Fiber	Flavonifractor plautii ATCC 29863	RelAbundance	CRC	Healthy	26	93	1158.5	0.748	0.82025
High_Fiber	Haemophilus parainfluenzae 215035 2 ISO5	RelAbundance	CRC	Healthy	12	77	235	0.00651	0.0234847
High_Fiber	Intestinimonas butyriciproducens AF211	RelAbundance	CRC	Healthy	22	81	808	0.507	0.650173
High_Fiber	Klebsiella pneumoniae 1162281	RelAbundance	CRC	Healthy	24	103	543	2e-05	0.000441143
High_Fiber	Klebsiella quasipneumoniae 700603	RelAbundance	CRC	Healthy	12	46	126	0.00321	0.0143244
High_Fiber	Klebsiella variicola KV321 ZB100000	RelAbundance	CRC	Healthy	9	45	93	0.00965	0.0317013
High_Fiber	Kluyvera ascorbata ATCC 33433	RelAbundance	CRC	Healthy	4	5	10	1	1
High_Fiber	Lactobacillus ruminis ATCC 25644	RelAbundance	CRC	Healthy	11	69	486	0.139	0.237933
High_Fiber	Megasphaera elsdenii DSM 20460	RelAbundance	CRC	Healthy	17	71	262	0.000313	0.0025706
High_Fiber	Muribaculum intestinale YL27	RelAbundance	CRC	Healthy	21	46	508	0.743	0.817024
High_Fiber	Odoribacter splanchnicus 1651 6 DSM 20712	RelAbundance	CRC	Healthy	25	96	1527	0.0366	0.078697
High_Fiber	Oscillibacter nov ERR1022355	RelAbundance	CRC	Healthy	22	82	964	0.624	0.729891
High_Fiber	Parabacteroides chinchillae DSM 29073	RelAbundance	CRC	Healthy	22	54	411	0.0366	0.078697
High_Fiber	Parabacteroides distasonis ATCC 8503	RelAbundance	CRC	Healthy	25	104	1682	0.023	0.0570932
High_Fiber	Parabacteroides goldsteinii CL02T12C30	RelAbundance	CRC	Healthy	25	80	1047	0.726	0.801777
High_Fiber	Parabacteroides johnsonii CL02T12C29	RelAbundance	CRC	Healthy	24	74	909	0.866	0.894983
High_Fiber	Parabacteroides merdae ATCC 43184	RelAbundance	CRC	Healthy	26	90	1315	0.339	0.475833
High_Fiber	Paraprevotella clara YIT 11840	RelAbundance	CRC	Healthy	24	85	690	0.016	0.0452454
High_Fiber	Paraprevotella xylaniphila YIT 11841	RelAbundance	CRC	Healthy	24	73	984	0.369	0.505982
High_Fiber	Phascolarctobacterium faecium DSM 14760	RelAbundance	CRC	Healthy	10	15	101.5	0.149	0.250606
High_Fiber	Phascolarctobacterium succinatutens YIT 12067	RelAbundance	CRC	Healthy	7	9	13	0.0549	0.110286
High_Fiber	Prevotella baroniae DSM 16972 JCM 13447	RelAbundance	CRC	Healthy	19	79	239	4.39e-06	0.000161385
High_Fiber	Prevotella bivia DSM 20514	RelAbundance	CRC	Healthy	21	63	425	0.0148	0.0430483
High_Fiber	Prevotella bryantii B14	RelAbundance	CRC	Healthy	20	79	736	0.641	0.737484
High_Fiber	Prevotella buccalis ATCC 35310	RelAbundance	CRC	Healthy	22	81	765	0.313	0.449974
High_Fiber	Prevotella copri CB7 DSM 18205	RelAbundance	CRC	Healthy	26	101	562	7.32e-06	0.000204856
High_Fiber	Prevotella corporis DSM 18810	RelAbundance	CRC	Healthy	20	78	584	0.0848	0.1544
High_Fiber	Prevotella dentalis DSM 3688	RelAbundance	CRC	Healthy	22	74	736	0.499	0.643333
High_Fiber	Prevotella denticola CRIS 18C A	RelAbundance	CRC	Healthy	21	76	452	0.00248	0.0117931
High_Fiber	Prevotella enoeca JCM 12259	RelAbundance	CRC	Healthy	20	55	257	0.000458	0.00333562
High_Fiber	Prevotella histicola F0411	RelAbundance	CRC	Healthy	14	49	479	0.0239	0.0582044
High_Fiber	Prevotella intermedia 17	RelAbundance	CRC	Healthy	22	83	845	0.595	0.711053
High_Fiber	Prevotella melaninogenica ATCC 25845	RelAbundance	CRC	Healthy	23	85	670	0.0212	0.0536603
High_Fiber	Prevotella multiformis DSM 16608	RelAbundance	CRC	Healthy	20	68	619	0.547	0.689286
High_Fiber	Prevotella nigrescens ATCC 33563	RelAbundance	CRC	Healthy	19	61	405	0.0492	0.101286
High_Fiber	Prevotella oris C735	RelAbundance	CRC	Healthy	20	66	713.5	0.588	0.708168
High_Fiber	Prevotella ruminicola 23	RelAbundance	CRC	Healthy	21	78	995	0.133	0.229187
High_Fiber	Prevotella sp C561	RelAbundance	CRC	Healthy	25	93	1051	0.465	0.609474
High_Fiber	Prevotella veroralis DSM 19559	RelAbundance	CRC	Healthy	17	64	231	0.00029	0.00254843
High_Fiber	Pseudomonas aeruginosa 152504	RelAbundance	CRC	Healthy	1	2	0	0.667	0.748436
High_Fiber	Roseburia faecis ERR1022321	RelAbundance	CRC	Healthy	26	101	1668	0.0342	0.0745831
High_Fiber	Roseburia hominis A2 183	RelAbundance	CRC	Healthy	26	93	1429	0.158	0.261751
High_Fiber	Roseburia intestinalis ERR1022474	RelAbundance	CRC	Healthy	26	102	1482	0.357	0.49215
High_Fiber	Ruminococcus albus 7	RelAbundance	CRC	Healthy	19	71	507	0.0987	0.174362
High_Fiber	Ruminococcus bicirculans 80 3	RelAbundance	CRC	Healthy	22	68	533	0.044	0.0923043
High_Fiber	Ruminococcus champanellensis 18P13	RelAbundance	CRC	Healthy	18	45	389	0.815	0.866639
High_Fiber	Ruminococcus lactaris ATCC 29176	RelAbundance	CRC	Healthy	23	69	383	0.000218	0.00217744
High_Fiber	Ruthenibacterium lactatiformans 585 1	RelAbundance	CRC	Healthy	23	73	965	0.283	0.414565
High_Fiber	Salmonella enterica enterica sv Typhimurium LT2	RelAbundance	CRC	Healthy	25	95	1282	0.544	0.688472
High_Fiber	Selenomonas ruminantium AC2024	RelAbundance	CRC	Healthy	7	29	86	0.557	0.696927
High_Fiber	Selenomonas sputigena ATCC 35185	RelAbundance	CRC	Healthy	13	30	149	0.232	0.360575
High_Fiber	Staphylococcus aureus 04 02981	RelAbundance	CRC	Healthy	12	39	144	0.0459	0.0947455
High_Fiber	Streptococcus pleomorphus DSM 20574	RelAbundance	CRC	Healthy	21	66	673	0.847	0.887177
High_Fiber	Streptococcus salivarius 57 I	RelAbundance	CRC	Healthy	9	57	227	0.588	0.708168
High_Fiber	Subdoligranulum sp 4 3 54A2FAA	RelAbundance	CRC	Healthy	19	71	648	0.797	0.856706
High_Fiber	Subdoligranulum variabile DSM 15176	RelAbundance	CRC	Healthy	19	69	572	0.4	0.542707
High_Fiber	Succinivibrio dextrinosolvens H5	RelAbundance	CRC	Healthy	9	15	46	0.215	0.337555
High_Fiber	Sutterella wadsworthensis 2 1 59BFAA	RelAbundance	CRC	Healthy	19	52	613	0.124	0.214637
High_fat	Acidaminococcus fermentans DSM 20731	RelAbundance	CRC	Healthy	10	34	104	0.066	0.123632
High_fat	Acidaminococcus intestini RyC MR95	RelAbundance	CRC	Healthy	18	56	284	0.00568	0.0208808
High_fat	Acidaminococcus massiliensis Marseille P2828	RelAbundance	CRC	Healthy	24	79	540	0.00148	0.00746771
High_fat	Acinetobacter baumannii 1656 2	RelAbundance	CRC	Healthy	8	18	49	0.216	0.337555
High_fat	Alcaligenes faecalis NBIB 017	RelAbundance	CRC	Healthy	25	87	924	0.255	0.385245
High_fat	Alistipes finegoldii DSM 17242	RelAbundance	CRC	Healthy	24	95	717	0.00514	0.0196954
High_fat	Alistipes indistinctus ERR2221377	RelAbundance	CRC	Healthy	21	81	307	6.99e-06	0.000204856
High_fat	Alistipes senegalensis JC50	RelAbundance	CRC	Healthy	24	68	600	0.0553	0.110286
High_fat	Alistipes shahii ERR2221103	RelAbundance	CRC	Healthy	25	83	977	0.662	0.748436
High_fat	Alloprevotella rava F0323	RelAbundance	CRC	Healthy	19	46	226	0.00194	0.00941937
High_fat	Anaerofustis stercorihominis DSM 17244	RelAbundance	CRC	Healthy	26	102	1240	0.613	0.722498
High_fat	Anaerostipes hadrus DSM 3319	RelAbundance	CRC	Healthy	17	70	357	0.011	0.0341044
High_fat	Anaerotruncus colihominis DSM 17241	RelAbundance	CRC	Healthy	20	53	380	0.0644	0.122758
High_fat	Ardenticatena maritima 110S	RelAbundance	CRC	Healthy	22	63	512	0.0701	0.129777
High_fat	Auritidibacter ignavus IMMIB L 1656	RelAbundance	CRC	Healthy	26	103	1087	0.14	0.238062
High_fat	Bacillus cereus 03BB102	RelAbundance	CRC	Healthy	11	29	180	0.55	0.689286
High_fat	Bacteroides acidifaciens 1e8A	RelAbundance	CRC	Healthy	24	79	577	0.00385	0.0161871
High_fat	Bacteroides caccae ATCC 43185	RelAbundance	CRC	Healthy	25	99	876	0.0246	0.0589789
High_fat	Bacteroides cellulosilyticus CL02T12C19	RelAbundance	CRC	Healthy	23	83	1045	0.49	0.633635
High_fat	Bacteroides coprocola M16 DSM 17136	RelAbundance	CRC	Healthy	24	95	1086	0.723	0.800798
High_fat	Bacteroides coprophilus DSM 18228	RelAbundance	CRC	Healthy	24	90	253	9.22e-09	1.01683e-06
High_fat	Bacteroides dorei CL02T00C15	RelAbundance	CRC	Healthy	26	102	965	0.0328	0.0723474
High_fat	Bacteroides eggerthii 1 2 48FAA	RelAbundance	CRC	Healthy	26	86	1491	0.0103	0.0327226
High_fat	Bacteroides faecis ERR1022362	RelAbundance	CRC	Healthy	25	100	976	0.0914	0.164095
High_fat	Bacteroides fragilis 3 1 12	RelAbundance	CRC	Healthy	26	104	1570	0.206	0.325885
High_fat	Bacteroides gallinarum DSM 18171 JCM 13658	RelAbundance	CRC	Healthy	22	55	436	0.0574	0.110698
High_fat	Bacteroides helcogenes P 36 108	RelAbundance	CRC	Healthy	21	49	282	0.00249	0.0117931
High_fat	Bacteroides nordii CL02T12C05	RelAbundance	CRC	Healthy	25	95	1014	0.264	0.391938
High_fat	Bacteroides ovatus 3 8 47FAA	RelAbundance	CRC	Healthy	26	104	1557	0.234	0.360575
High_fat	Bacteroides salanitronis DSM 18170	RelAbundance	CRC	Healthy	23	84	533	0.00104	0.00557556
High_fat	Bacteroides salyersiae CL02T12C01	RelAbundance	CRC	Healthy	25	102	879	0.0165	0.0459856
High_fat	Bacteroides stercoris ATCC 43183	RelAbundance	CRC	Healthy	26	98	1438	0.316	0.450096
High_fat	Bacteroides thetaiotaomicron 3731	RelAbundance	CRC	Healthy	26	103	924	0.015	0.0430483
High_fat	Bacteroides uniformis ATCC 8492	RelAbundance	CRC	Healthy	26	103	1178	0.346	0.482152
High_fat	Bacteroides vulgatus ATCC 8482	RelAbundance	CRC	Healthy	26	103	1443	0.543	0.688335
High_fat	Bacteroides xylanisolvens CL03T12C04	RelAbundance	CRC	Healthy	26	104	1036	0.0663	0.123632
High_fat	Barnesiella intestinihominis ERR1203957	RelAbundance	CRC	Healthy	22	81	450	0.000393	0.00303396
High_fat	Barnesiella viscericola DSM 18177	RelAbundance	CRC	Healthy	21	49	346	0.0305	0.0694572
High_fat	Bifidobacterium adolescentis ATCC 15703	RelAbundance	CRC	Healthy	14	91	337	0.00475	0.0185202
High_fat	Bifidobacterium catenulatum DSM 16992	RelAbundance	CRC	Healthy	17	73	241	9.35e-05	0.00111049
High_fat	Bifidobacterium longum BG7	RelAbundance	CRC	Healthy	26	100	752	0.000965	0.00536567
High_fat	Bifidobacterium pseudocatenulatum DSM 20438	RelAbundance	CRC	Healthy	14	67	201	0.000834	0.00519232
High_fat	Blautia coccoides YL58	RelAbundance	CRC	Healthy	24	74	604	0.0192	0.0499071
High_fat	Blautia hansenii VPI C7 24 DSM 20583	RelAbundance	CRC	Healthy	15	45	293	0.457	0.602055
High_fat	Blautia luti DSM 14534	RelAbundance	CRC	Healthy	22	78	404	0.000161	0.00167962
High_fat	Blautia obeum ATCC 29174	RelAbundance	CRC	Healthy	26	93	634	0.00022	0.00217744
High_fat	Blautia torques ERR1022291	RelAbundance	CRC	Healthy	24	88	980	0.592	0.708564
High_fat	Blautia wexlerae AGR2146	RelAbundance	CRC	Healthy	26	96	555	1.49e-05	0.000338318
High_fat	Catenibacterium mitsuokai DSM 15897	RelAbundance	CRC	Healthy	17	51	221	0.00268	0.0122424
High_fat	Citrobacter freundii 4 7 47CFAA	RelAbundance	CRC	Healthy	10	23	100	0.576	0.703595
High_fat	Clostridioides difficile 002 P50 2011	RelAbundance	CRC	Healthy	22	68	493	0.0169	0.0464299
High_fat	Clostridium acetobutylicum ATCC 824	RelAbundance	CRC	Healthy	22	71	543	0.0318	0.0709526
High_fat	Clostridium baratii 796 15	RelAbundance	CRC	Healthy	2	7	0	0.0556	0.110286
High_fat	Clostridium beijerinckii G117	RelAbundance	CRC	Healthy	3	9	5	0.145	0.24441
High_fat	Clostridium botulinum A2 str Kyoto	RelAbundance	CRC	Healthy	11	24	55	0.00523	0.0196954
High_fat	Clostridium butyricum 5521	RelAbundance	CRC	Healthy	3	8	0	0.0121	0.0360664
High_fat	Clostridium hathewayi 12489931	RelAbundance	CRC	Healthy	25	61	914	0.151	0.251775
High_fat	Clostridium perfringens ATCC 13124	RelAbundance	CRC	Healthy	20	48	305	0.018	0.0484181
High_fat	Clostridium scindens ATCC 35704	RelAbundance	CRC	Healthy	26	78	908	0.428	0.572645
High_fat	Collinsella aerofaciens ATCC 25986	RelAbundance	CRC	Healthy	25	92	708	0.00333	0.0146066
High_fat	Comamonas aquatica CJG	RelAbundance	CRC	Healthy	5	20	42	0.621	0.727484
High_fat	Coprobacter fastidiosus NSB1	RelAbundance	CRC	Healthy	14	30	80	0.000703	0.00456064
High_fat	Coprococcus catus ERR2221258	RelAbundance	CRC	Healthy	26	90	631	0.000364	0.00289699
High_fat	Coprococcus comes ATCC 27758	RelAbundance	CRC	Healthy	25	97	933	0.0768	0.140497
High_fat	Coprococcus eutactus ATCC 27759	RelAbundance	CRC	Healthy	16	78	362	0.00852	0.0293087
High_fat	Cronobacter sakazakii 2151	RelAbundance	CRC	Healthy	1	9	0	0.2	0.319669
High_fat	Dialister succinatiphilus YIT 11850	RelAbundance	CRC	Healthy	23	74	425	0.000307	0.00254843
High_fat	Dielma fastidiosa JC13	RelAbundance	CRC	Healthy	22	85	1055	0.357	0.49215
High_fat	Dorea formicigenerans 4 6 53AFAA	RelAbundance	CRC	Healthy	26	91	837	0.0235	0.0574114
High_fat	Dorea longicatena DSM 13814	RelAbundance	CRC	Healthy	25	100	586	4.22e-05	0.000651568
High_fat	Eisenbergiella nov ERR2221109	RelAbundance	CRC	Healthy	22	59	524	0.186	0.303577
High_fat	Enterobacter aerogenes EA1509E	RelAbundance	CRC	Healthy	2	5	3	0.571	0.70193
High_fat	Enterobacter cloacae ERR2221114	RelAbundance	CRC	Healthy	10	45	216	0.855	0.887177
High_fat	Enterobacter hormaechei ATCC 49162	RelAbundance	CRC	Healthy	14	62	393	0.587	0.708168
High_fat	Enterobacter roggenkampii 35734	RelAbundance	CRC	Healthy	8	41	123	0.279	0.410263
High_fat	Escherichia coli 042	RelAbundance	CRC	Healthy	26	104	1547	0.258	0.38675
High_fat	Eubacterium biforme DSM 3989	RelAbundance	CRC	Healthy	16	42	208	0.0255	0.0596545
High_fat	Eubacterium eligens ATCC 27750	RelAbundance	CRC	Healthy	23	97	522	7.7e-05	0.000974492
High_fat	Eubacterium hallii DSM 3353	RelAbundance	CRC	Healthy	24	82	457	7.05e-05	0.000938379
High_fat	Eubacterium ramulus ATCC 29099	RelAbundance	CRC	Healthy	24	73	470	0.000699	0.00456064
High_fat	Eubacterium ventriosum ATCC 27560	RelAbundance	CRC	Healthy	15	56	219	0.00474	0.0185202
High_fat	Faecalibacterium cf ERR1022328	RelAbundance	CRC	Healthy	24	100	491	7.43e-06	0.000204856
High_fat	Faecalibacterium prausnitzii A2 165	RelAbundance	CRC	Healthy	26	104	462	2.25e-07	1.737e-05
High_fat	Flavonifractor plautii ATCC 29863	RelAbundance	CRC	Healthy	26	93	1544	0.0315	0.070898
High_fat	Haemophilus parainfluenzae 215035 2 ISO5	RelAbundance	CRC	Healthy	12	77	248	0.0103	0.0327226
High_fat	Intestinimonas butyriciproducens AF211	RelAbundance	CRC	Healthy	22	81	948	0.649	0.741166
High_fat	Klebsiella pneumoniae 1162281	RelAbundance	CRC	Healthy	24	103	570	4.16e-05	0.000651568
High_fat	Klebsiella quasipneumoniae 700603	RelAbundance	CRC	Healthy	12	46	110	0.000975	0.00536567
High_fat	Klebsiella variicola KV321 ZB100000	RelAbundance	CRC	Healthy	9	45	103	0.0197	0.0503589
High_fat	Kluyvera ascorbata ATCC 33433	RelAbundance	CRC	Healthy	4	5	10	1	1
High_fat	Lactobacillus ruminis ATCC 25644	RelAbundance	CRC	Healthy	11	69	164	0.00267	0.0122424
High_fat	Megasphaera elsdenii DSM 20460	RelAbundance	CRC	Healthy	17	71	270	0.000432	0.00320677
High_fat	Muribaculum intestinale YL27	RelAbundance	CRC	Healthy	21	46	381	0.171	0.280877
High_fat	Odoribacter splanchnicus 1651 6 DSM 20712	RelAbundance	CRC	Healthy	25	96	1499	0.056	0.110286
High_fat	Oscillibacter nov ERR1022355	RelAbundance	CRC	Healthy	22	82	755	0.244	0.372269
High_fat	Parabacteroides chinchillae DSM 29073	RelAbundance	CRC	Healthy	22	54	398	0.0251	0.0594393
High_fat	Parabacteroides distasonis ATCC 8503	RelAbundance	CRC	Healthy	25	104	1695	0.0187	0.049271
High_fat	Parabacteroides goldsteinii CL02T12C30	RelAbundance	CRC	Healthy	25	80	1039	0.772	0.833544
High_fat	Parabacteroides johnsonii CL02T12C29	RelAbundance	CRC	Healthy	24	74	911	0.853	0.887177
High_fat	Parabacteroides merdae ATCC 43184	RelAbundance	CRC	Healthy	26	90	1326	0.303	0.438045
High_fat	Paraprevotella clara YIT 11840	RelAbundance	CRC	Healthy	24	85	705	0.0215	0.0537152
High_fat	Paraprevotella xylaniphila YIT 11841	RelAbundance	CRC	Healthy	24	73	536	0.00454	0.0182546
High_fat	Phascolarctobacterium faecium DSM 14760	RelAbundance	CRC	Healthy	10	15	51	0.196	0.317216
High_fat	Phascolarctobacterium succinatutens YIT 12067	RelAbundance	CRC	Healthy	7	9	13	0.0549	0.110286
High_fat	Prevotella baroniae DSM 16972 JCM 13447	RelAbundance	CRC	Healthy	19	79	233	3.39e-06	0.000155558
High_fat	Prevotella bivia DSM 20514	RelAbundance	CRC	Healthy	21	63	427	0.0156	0.0442765
High_fat	Prevotella bryantii B14	RelAbundance	CRC	Healthy	20	79	410	0.000942	0.00536567
High_fat	Prevotella buccalis ATCC 35310	RelAbundance	CRC	Healthy	22	81	631	0.0368	0.078697
High_fat	Prevotella copri CB7 DSM 18205	RelAbundance	CRC	Healthy	26	101	541	4.03e-06	0.000155558
High_fat	Prevotella corporis DSM 18810	RelAbundance	CRC	Healthy	20	78	590	0.0948	0.168243
High_fat	Prevotella dentalis DSM 3688	RelAbundance	CRC	Healthy	22	74	512	0.00858	0.0293087
High_fat	Prevotella denticola CRIS 18C A	RelAbundance	CRC	Healthy	21	76	468	0.0039	0.0161871
High_fat	Prevotella enoeca JCM 12259	RelAbundance	CRC	Healthy	20	55	265	0.000653	0.0044612
High_fat	Prevotella histicola F0411	RelAbundance	CRC	Healthy	14	49	132	0.000285	0.00254843
High_fat	Prevotella intermedia 17	RelAbundance	CRC	Healthy	22	83	643	0.0338	0.0739195
High_fat	Prevotella melaninogenica ATCC 25845	RelAbundance	CRC	Healthy	23	85	639	0.0112	0.0341755
High_fat	Prevotella multiformis DSM 16608	RelAbundance	CRC	Healthy	20	68	332	0.00054	0.00382459
High_fat	Prevotella nigrescens ATCC 33563	RelAbundance	CRC	Healthy	19	61	411	0.0575	0.110698
High_fat	Prevotella oris C735	RelAbundance	CRC	Healthy	20	66	305	0.00029	0.00254843
High_fat	Prevotella ruminicola 23	RelAbundance	CRC	Healthy	21	78	513	0.00893	0.0299737
High_fat	Prevotella sp C561	RelAbundance	CRC	Healthy	25	93	549	5.41e-05	0.00077343
High_fat	Prevotella veroralis DSM 19559	RelAbundance	CRC	Healthy	17	64	232	0.000303	0.00254843
High_fat	Pseudomonas aeruginosa 152504	RelAbundance	CRC	Healthy	1	2	0	0.667	0.748436
High_fat	Roseburia faecis ERR1022321	RelAbundance	CRC	Healthy	26	101	299	1.4e-09	3.60267e-07
High_fat	Roseburia hominis A2 183	RelAbundance	CRC	Healthy	26	93	691	0.000875	0.0053189
High_fat	Roseburia intestinalis ERR1022474	RelAbundance	CRC	Healthy	26	102	611	2.32e-05	0.000471326
High_fat	Ruminococcus albus 7	RelAbundance	CRC	Healthy	19	71	615	0.56	0.69729
High_fat	Ruminococcus bicirculans 80 3	RelAbundance	CRC	Healthy	22	68	439	0.00377	0.0161871
High_fat	Ruminococcus champanellensis 18P13	RelAbundance	CRC	Healthy	18	45	392	0.851	0.887177
High_fat	Ruminococcus lactaris ATCC 29176	RelAbundance	CRC	Healthy	23	69	364	0.00011	0.00121314
High_fat	Ruthenibacterium lactatiformans 585 1	RelAbundance	CRC	Healthy	23	73	1224	0.00098	0.00536567
High_fat	Salmonella enterica enterica sv Typhimurium LT2	RelAbundance	CRC	Healthy	25	95	870	0.0405	0.0854262
High_fat	Selenomonas ruminantium AC2024	RelAbundance	CRC	Healthy	7	29	46	0.0255	0.0596545
High_fat	Selenomonas sputigena ATCC 35185	RelAbundance	CRC	Healthy	13	30	76	0.00117	0.00610297
High_fat	Staphylococcus aureus 04 02981	RelAbundance	CRC	Healthy	12	39	144	0.0459	0.0947455
High_fat	Streptococcus pleomorphus DSM 20574	RelAbundance	CRC	Healthy	21	66	530	0.107	0.187736
High_fat	Streptococcus salivarius 57 I	RelAbundance	CRC	Healthy	9	57	231	0.64	0.737433
High_fat	Subdoligranulum sp 4 3 54A2FAA	RelAbundance	CRC	Healthy	19	71	411	0.00931	0.030715
High_fat	Subdoligranulum variabile DSM 15176	RelAbundance	CRC	Healthy	19	69	413	0.0141	0.0413886
High_fat	Succinivibrio dextrinosolvens H5	RelAbundance	CRC	Healthy	9	15	16	0.00128	0.00650105
High_fat	Sutterella wadsworthensis 2 1 59BFAA	RelAbundance	CRC	Healthy	19	52	155	1.1e-05	0.000273935
High_protein	Acidaminococcus fermentans DSM 20731	RelAbundance	CRC	Healthy	10	34	104	0.066	0.123632
High_protein	Acidaminococcus intestini RyC MR95	RelAbundance	CRC	Healthy	18	56	284	0.00568	0.0208808
High_protein	Acidaminococcus massiliensis Marseille P2828	RelAbundance	CRC	Healthy	24	79	541	0.00152	0.00757058
High_protein	Acinetobacter baumannii 1656 2	RelAbundance	CRC	Healthy	8	18	49	0.216	0.337555
High_protein	Alcaligenes faecalis NBIB 017	RelAbundance	CRC	Healthy	25	87	924	0.255	0.385245
High_protein	Alistipes finegoldii DSM 17242	RelAbundance	CRC	Healthy	24	95	717	0.00514	0.0196954
High_protein	Alistipes indistinctus ERR2221377	RelAbundance	CRC	Healthy	21	81	307	6.99e-06	0.000204856
High_protein	Alistipes senegalensis JC50	RelAbundance	CRC	Healthy	24	68	600	0.0553	0.110286
High_protein	Alistipes shahii ERR2221103	RelAbundance	CRC	Healthy	25	83	977	0.662	0.748436
High_protein	Alloprevotella rava F0323	RelAbundance	CRC	Healthy	19	46	226	0.00194	0.00941937
High_protein	Anaerofustis stercorihominis DSM 17244	RelAbundance	CRC	Healthy	26	102	1240	0.613	0.722498
High_protein	Anaerostipes hadrus DSM 3319	RelAbundance	CRC	Healthy	17	70	357	0.011	0.0341044
High_protein	Anaerotruncus colihominis DSM 17241	RelAbundance	CRC	Healthy	20	53	380	0.0644	0.122758
High_protein	Ardenticatena maritima 110S	RelAbundance	CRC	Healthy	22	63	512	0.0701	0.129777
High_protein	Auritidibacter ignavus IMMIB L 1656	RelAbundance	CRC	Healthy	26	103	1087	0.14	0.238062
High_protein	Bacillus cereus 03BB102	RelAbundance	CRC	Healthy	11	29	180	0.55	0.689286
High_protein	Bacteroides acidifaciens 1e8A	RelAbundance	CRC	Healthy	24	79	577	0.00385	0.0161871
High_protein	Bacteroides caccae ATCC 43185	RelAbundance	CRC	Healthy	25	99	876	0.0246	0.0589789
High_protein	Bacteroides cellulosilyticus CL02T12C19	RelAbundance	CRC	Healthy	23	83	1045	0.49	0.633635
High_protein	Bacteroides coprocola M16 DSM 17136	RelAbundance	CRC	Healthy	24	95	1086	0.723	0.800798
High_protein	Bacteroides coprophilus DSM 18228	RelAbundance	CRC	Healthy	24	90	253	9.22e-09	1.01683e-06
High_protein	Bacteroides dorei CL02T00C15	RelAbundance	CRC	Healthy	26	102	965	0.0328	0.0723474
High_protein	Bacteroides eggerthii 1 2 48FAA	RelAbundance	CRC	Healthy	26	86	1491	0.0103	0.0327226
High_protein	Bacteroides faecis ERR1022362	RelAbundance	CRC	Healthy	25	100	976	0.0914	0.164095
High_protein	Bacteroides fragilis 3 1 12	RelAbundance	CRC	Healthy	26	104	1570	0.206	0.325885
High_protein	Bacteroides gallinarum DSM 18171 JCM 13658	RelAbundance	CRC	Healthy	22	55	436	0.0574	0.110698
High_protein	Bacteroides helcogenes P 36 108	RelAbundance	CRC	Healthy	21	49	282	0.00249	0.0117931
High_protein	Bacteroides nordii CL02T12C05	RelAbundance	CRC	Healthy	25	95	1014	0.264	0.391938
High_protein	Bacteroides ovatus 3 8 47FAA	RelAbundance	CRC	Healthy	26	104	1557	0.234	0.360575
High_protein	Bacteroides salanitronis DSM 18170	RelAbundance	CRC	Healthy	23	84	533	0.00104	0.00557556
High_protein	Bacteroides salyersiae CL02T12C01	RelAbundance	CRC	Healthy	25	102	879	0.0165	0.0459856
High_protein	Bacteroides stercoris ATCC 43183	RelAbundance	CRC	Healthy	26	98	1438	0.316	0.450096
High_protein	Bacteroides thetaiotaomicron 3731	RelAbundance	CRC	Healthy	26	103	924	0.015	0.0430483
High_protein	Bacteroides uniformis ATCC 8492	RelAbundance	CRC	Healthy	26	103	1178	0.346	0.482152
High_protein	Bacteroides vulgatus ATCC 8482	RelAbundance	CRC	Healthy	26	103	1443	0.543	0.688335
High_protein	Bacteroides xylanisolvens CL03T12C04	RelAbundance	CRC	Healthy	26	104	1036	0.0663	0.123632
High_protein	Barnesiella intestinihominis ERR1203957	RelAbundance	CRC	Healthy	22	81	450	0.000393	0.00303396
High_protein	Barnesiella viscericola DSM 18177	RelAbundance	CRC	Healthy	21	49	346	0.0305	0.0694572
High_protein	Bifidobacterium adolescentis ATCC 15703	RelAbundance	CRC	Healthy	14	91	337	0.00475	0.0185202
High_protein	Bifidobacterium catenulatum DSM 16992	RelAbundance	CRC	Healthy	17	73	241	9.35e-05	0.00111049
High_protein	Bifidobacterium longum BG7	RelAbundance	CRC	Healthy	26	100	752	0.000965	0.00536567
High_protein	Bifidobacterium pseudocatenulatum DSM 20438	RelAbundance	CRC	Healthy	14	67	201	0.000834	0.00519232
High_protein	Blautia coccoides YL58	RelAbundance	CRC	Healthy	24	74	604	0.0192	0.0499071
High_protein	Blautia hansenii VPI C7 24 DSM 20583	RelAbundance	CRC	Healthy	15	45	293	0.457	0.602055
High_protein	Blautia luti DSM 14534	RelAbundance	CRC	Healthy	22	78	404	0.000161	0.00167962
High_protein	Blautia obeum ATCC 29174	RelAbundance	CRC	Healthy	26	93	634	0.00022	0.00217744
High_protein	Blautia torques ERR1022291	RelAbundance	CRC	Healthy	24	88	980	0.592	0.708564
High_protein	Blautia wexlerae AGR2146	RelAbundance	CRC	Healthy	26	96	555	1.49e-05	0.000338318
High_protein	Catenibacterium mitsuokai DSM 15897	RelAbundance	CRC	Healthy	17	51	221	0.00268	0.0122424
High_protein	Citrobacter freundii 4 7 47CFAA	RelAbundance	CRC	Healthy	10	23	100	0.576	0.703595
High_protein	Clostridioides difficile 002 P50 2011	RelAbundance	CRC	Healthy	22	68	493	0.0169	0.0464299
High_protein	Clostridium acetobutylicum ATCC 824	RelAbundance	CRC	Healthy	22	71	543	0.0318	0.0709526
High_protein	Clostridium baratii 796 15	RelAbundance	CRC	Healthy	2	7	0	0.0556	0.110286
High_protein	Clostridium beijerinckii G117	RelAbundance	CRC	Healthy	3	9	5	0.145	0.24441
High_protein	Clostridium botulinum A2 str Kyoto	RelAbundance	CRC	Healthy	11	24	55	0.00523	0.0196954
High_protein	Clostridium butyricum 5521	RelAbundance	CRC	Healthy	3	8	0	0.0121	0.0360664
High_protein	Clostridium hathewayi 12489931	RelAbundance	CRC	Healthy	25	61	914	0.151	0.251775
High_protein	Clostridium perfringens ATCC 13124	RelAbundance	CRC	Healthy	20	48	305	0.018	0.0484181
High_protein	Clostridium scindens ATCC 35704	RelAbundance	CRC	Healthy	26	78	908	0.428	0.572645
High_protein	Collinsella aerofaciens ATCC 25986	RelAbundance	CRC	Healthy	25	92	708	0.00333	0.0146066
High_protein	Comamonas aquatica CJG	RelAbundance	CRC	Healthy	5	20	42	0.621	0.727484
High_protein	Coprobacter fastidiosus NSB1	RelAbundance	CRC	Healthy	14	30	80	0.000703	0.00456064
High_protein	Coprococcus catus ERR2221258	RelAbundance	CRC	Healthy	26	90	631	0.000364	0.00289699
High_protein	Coprococcus comes ATCC 27758	RelAbundance	CRC	Healthy	25	97	933	0.0768	0.140497
High_protein	Coprococcus eutactus ATCC 27759	RelAbundance	CRC	Healthy	16	78	362	0.00852	0.0293087
High_protein	Cronobacter sakazakii 2151	RelAbundance	CRC	Healthy	1	9	0	0.2	0.319669
High_protein	Dialister succinatiphilus YIT 11850	RelAbundance	CRC	Healthy	23	74	425	0.000307	0.00254843
High_protein	Dielma fastidiosa JC13	RelAbundance	CRC	Healthy	22	85	1055	0.357	0.49215
High_protein	Dorea formicigenerans 4 6 53AFAA	RelAbundance	CRC	Healthy	26	91	837	0.0235	0.0574114
High_protein	Dorea longicatena DSM 13814	RelAbundance	CRC	Healthy	25	100	586	4.22e-05	0.000651568
High_protein	Eisenbergiella nov ERR2221109	RelAbundance	CRC	Healthy	22	59	524	0.186	0.303577
High_protein	Enterobacter aerogenes EA1509E	RelAbundance	CRC	Healthy	2	5	3	0.571	0.70193
High_protein	Enterobacter cloacae ERR2221114	RelAbundance	CRC	Healthy	10	45	216	0.855	0.887177
High_protein	Enterobacter hormaechei ATCC 49162	RelAbundance	CRC	Healthy	14	62	393	0.587	0.708168
High_protein	Enterobacter roggenkampii 35734	RelAbundance	CRC	Healthy	8	41	123	0.279	0.410263
High_protein	Escherichia coli 042	RelAbundance	CRC	Healthy	26	104	1547	0.258	0.38675
High_protein	Eubacterium biforme DSM 3989	RelAbundance	CRC	Healthy	16	42	209	0.0267	0.0618991
High_protein	Eubacterium eligens ATCC 27750	RelAbundance	CRC	Healthy	23	97	521	7.48e-05	0.000962427
High_protein	Eubacterium hallii DSM 3353	RelAbundance	CRC	Healthy	24	82	457	7.05e-05	0.000938379
High_protein	Eubacterium ramulus ATCC 29099	RelAbundance	CRC	Healthy	24	73	470	0.000699	0.00456064
High_protein	Eubacterium ventriosum ATCC 27560	RelAbundance	CRC	Healthy	15	56	219	0.00474	0.0185202
High_protein	Faecalibacterium cf ERR1022328	RelAbundance	CRC	Healthy	24	100	491	7.43e-06	0.000204856
High_protein	Faecalibacterium prausnitzii A2 165	RelAbundance	CRC	Healthy	26	104	462	2.25e-07	1.737e-05
High_protein	Flavonifractor plautii ATCC 29863	RelAbundance	CRC	Healthy	26	93	1544	0.0315	0.070898
High_protein	Haemophilus parainfluenzae 215035 2 ISO5	RelAbundance	CRC	Healthy	12	77	248	0.0103	0.0327226
High_protein	Intestinimonas butyriciproducens AF211	RelAbundance	CRC	Healthy	22	81	948	0.649	0.741166
High_protein	Klebsiella pneumoniae 1162281	RelAbundance	CRC	Healthy	24	103	570	4.16e-05	0.000651568
High_protein	Klebsiella quasipneumoniae 700603	RelAbundance	CRC	Healthy	12	46	110	0.000975	0.00536567
High_protein	Klebsiella variicola KV321 ZB100000	RelAbundance	CRC	Healthy	9	45	103	0.0197	0.0503589
High_protein	Kluyvera ascorbata ATCC 33433	RelAbundance	CRC	Healthy	4	5	10	1	1
High_protein	Lactobacillus ruminis ATCC 25644	RelAbundance	CRC	Healthy	11	69	164	0.00267	0.0122424
High_protein	Megasphaera elsdenii DSM 20460	RelAbundance	CRC	Healthy	17	71	270	0.000432	0.00320677
High_protein	Muribaculum intestinale YL27	RelAbundance	CRC	Healthy	21	46	381	0.171	0.280877
High_protein	Odoribacter splanchnicus 1651 6 DSM 20712	RelAbundance	CRC	Healthy	25	96	1499	0.056	0.110286
High_protein	Oscillibacter nov ERR1022355	RelAbundance	CRC	Healthy	22	82	755	0.244	0.372269
High_protein	Parabacteroides chinchillae DSM 29073	RelAbundance	CRC	Healthy	22	54	398	0.0251	0.0594393
High_protein	Parabacteroides distasonis ATCC 8503	RelAbundance	CRC	Healthy	25	104	1695	0.0187	0.049271
High_protein	Parabacteroides goldsteinii CL02T12C30	RelAbundance	CRC	Healthy	25	80	1039	0.772	0.833544
High_protein	Parabacteroides johnsonii CL02T12C29	RelAbundance	CRC	Healthy	24	74	911	0.853	0.887177
High_protein	Parabacteroides merdae ATCC 43184	RelAbundance	CRC	Healthy	26	90	1326	0.303	0.438045
High_protein	Paraprevotella clara YIT 11840	RelAbundance	CRC	Healthy	24	85	705	0.0215	0.0537152
High_protein	Paraprevotella xylaniphila YIT 11841	RelAbundance	CRC	Healthy	24	73	536	0.00454	0.0182546
High_protein	Phascolarctobacterium faecium DSM 14760	RelAbundance	CRC	Healthy	10	15	51	0.196	0.317216
High_protein	Phascolarctobacterium succinatutens YIT 12067	RelAbundance	CRC	Healthy	7	9	13	0.0549	0.110286
High_protein	Prevotella baroniae DSM 16972 JCM 13447	RelAbundance	CRC	Healthy	19	79	233	3.39e-06	0.000155558
High_protein	Prevotella bivia DSM 20514	RelAbundance	CRC	Healthy	21	63	427	0.0156	0.0442765
High_protein	Prevotella bryantii B14	RelAbundance	CRC	Healthy	20	79	410	0.000942	0.00536567
High_protein	Prevotella buccalis ATCC 35310	RelAbundance	CRC	Healthy	22	81	631	0.0368	0.078697
High_protein	Prevotella copri CB7 DSM 18205	RelAbundance	CRC	Healthy	26	101	541	4.03e-06	0.000155558
High_protein	Prevotella corporis DSM 18810	RelAbundance	CRC	Healthy	20	78	590	0.0948	0.168243
High_protein	Prevotella dentalis DSM 3688	RelAbundance	CRC	Healthy	22	74	512	0.00858	0.0293087
High_protein	Prevotella denticola CRIS 18C A	RelAbundance	CRC	Healthy	21	76	468	0.0039	0.0161871
High_protein	Prevotella enoeca JCM 12259	RelAbundance	CRC	Healthy	20	55	265	0.000653	0.0044612
High_protein	Prevotella histicola F0411	RelAbundance	CRC	Healthy	14	49	132	0.000285	0.00254843
High_protein	Prevotella intermedia 17	RelAbundance	CRC	Healthy	22	83	643	0.0338	0.0739195
High_protein	Prevotella melaninogenica ATCC 25845	RelAbundance	CRC	Healthy	23	85	639	0.0112	0.0341755
High_protein	Prevotella multiformis DSM 16608	RelAbundance	CRC	Healthy	20	68	332	0.00054	0.00382459
High_protein	Prevotella nigrescens ATCC 33563	RelAbundance	CRC	Healthy	19	61	411	0.0575	0.110698
High_protein	Prevotella oris C735	RelAbundance	CRC	Healthy	20	66	305	0.00029	0.00254843
High_protein	Prevotella ruminicola 23	RelAbundance	CRC	Healthy	21	78	513	0.00893	0.0299737
High_protein	Prevotella sp C561	RelAbundance	CRC	Healthy	25	93	549	5.41e-05	0.00077343
High_protein	Prevotella veroralis DSM 19559	RelAbundance	CRC	Healthy	17	64	232	0.000303	0.00254843
High_protein	Pseudomonas aeruginosa 152504	RelAbundance	CRC	Healthy	1	2	0	0.667	0.748436
High_protein	Roseburia faecis ERR1022321	RelAbundance	CRC	Healthy	26	101	299	1.4e-09	3.60267e-07
High_protein	Roseburia hominis A2 183	RelAbundance	CRC	Healthy	26	93	691	0.000875	0.0053189
High_protein	Roseburia intestinalis ERR1022474	RelAbundance	CRC	Healthy	26	102	611	2.32e-05	0.000471326
High_protein	Ruminococcus albus 7	RelAbundance	CRC	Healthy	19	71	615	0.56	0.69729
High_protein	Ruminococcus bicirculans 80 3	RelAbundance	CRC	Healthy	22	68	439	0.00377	0.0161871
High_protein	Ruminococcus champanellensis 18P13	RelAbundance	CRC	Healthy	18	45	392	0.851	0.887177
High_protein	Ruminococcus lactaris ATCC 29176	RelAbundance	CRC	Healthy	23	69	364	0.00011	0.00121314
High_protein	Ruthenibacterium lactatiformans 585 1	RelAbundance	CRC	Healthy	23	73	1224	0.00098	0.00536567
High_protein	Salmonella enterica enterica sv Typhimurium LT2	RelAbundance	CRC	Healthy	25	95	870	0.0405	0.0854262
High_protein	Selenomonas ruminantium AC2024	RelAbundance	CRC	Healthy	7	29	46	0.0255	0.0596545
High_protein	Selenomonas sputigena ATCC 35185	RelAbundance	CRC	Healthy	13	30	76	0.00117	0.00610297
High_protein	Staphylococcus aureus 04 02981	RelAbundance	CRC	Healthy	12	39	144	0.0459	0.0947455
High_protein	Streptococcus pleomorphus DSM 20574	RelAbundance	CRC	Healthy	21	66	529	0.105	0.184647
High_protein	Streptococcus salivarius 57 I	RelAbundance	CRC	Healthy	9	57	231	0.64	0.737433
High_protein	Subdoligranulum sp 4 3 54A2FAA	RelAbundance	CRC	Healthy	19	71	411	0.00931	0.030715
High_protein	Subdoligranulum variabile DSM 15176	RelAbundance	CRC	Healthy	19	69	413	0.0141	0.0413886
High_protein	Succinivibrio dextrinosolvens H5	RelAbundance	CRC	Healthy	9	15	16	0.00128	0.00650105
High_protein	Sutterella wadsworthensis 2 1 59BFAA	RelAbundance	CRC	Healthy	19	52	155	1.1e-05	0.000273935
Mediterranean	Acidaminococcus fermentans DSM 20731	RelAbundance	CRC	Healthy	10	34	104	0.066	0.123632
Mediterranean	Acidaminococcus intestini RyC MR95	RelAbundance	CRC	Healthy	18	56	284	0.00568	0.0208808
Mediterranean	Acinetobacter baumannii 1656 2	RelAbundance	CRC	Healthy	8	18	49	0.216	0.337555
Mediterranean	Alcaligenes faecalis NBIB 017	RelAbundance	CRC	Healthy	25	87	924	0.255	0.385245
Mediterranean	Bacillus cereus 03BB102	RelAbundance	CRC	Healthy	11	29	180	0.55	0.689286
Mediterranean	Bacteroides caccae ATCC 43185	RelAbundance	CRC	Healthy	25	99	1082	0.334	0.469668
Mediterranean	Bacteroides cellulosilyticus CL02T12C19	RelAbundance	CRC	Healthy	23	83	1045	0.49	0.633635
Mediterranean	Bacteroides coprocola M16 DSM 17136	RelAbundance	CRC	Healthy	22	93	1090.5	0.633	0.737068
Mediterranean	Bacteroides coprophilus DSM 18228	RelAbundance	CRC	Healthy	21	88	1183.5	0.0454	0.0947455
Mediterranean	Bacteroides dorei CL02T00C15	RelAbundance	CRC	Healthy	26	102	965	0.0328	0.0723474
Mediterranean	Bacteroides eggerthii 1 2 48FAA	RelAbundance	CRC	Healthy	26	86	1491	0.0103	0.0327226
Mediterranean	Bacteroides fragilis 3 1 12	RelAbundance	CRC	Healthy	26	104	1570	0.206	0.325885
Mediterranean	Bacteroides nordii CL02T12C05	RelAbundance	CRC	Healthy	25	95	1014	0.264	0.391938
Mediterranean	Bacteroides ovatus 3 8 47FAA	RelAbundance	CRC	Healthy	26	104	1557	0.234	0.360575
Mediterranean	Bacteroides salyersiae CL02T12C01	RelAbundance	CRC	Healthy	25	102	879	0.0165	0.0459856
Mediterranean	Bacteroides stercoris ATCC 43183	RelAbundance	CRC	Healthy	26	98	1438	0.316	0.450096
Mediterranean	Bacteroides thetaiotaomicron 3731	RelAbundance	CRC	Healthy	26	103	924	0.015	0.0430483
Mediterranean	Bacteroides uniformis ATCC 8492	RelAbundance	CRC	Healthy	26	103	1178	0.346	0.482152
Mediterranean	Bacteroides xylanisolvens CL03T12C04	RelAbundance	CRC	Healthy	26	104	1036	0.0663	0.123632
Mediterranean	Bifidobacterium adolescentis ATCC 15703	RelAbundance	CRC	Healthy	14	91	684	0.661	0.748436
Mediterranean	Bifidobacterium longum BG7	RelAbundance	CRC	Healthy	26	100	752	0.000965	0.00536567
Mediterranean	Citrobacter freundii 4 7 47CFAA	RelAbundance	CRC	Healthy	10	23	100	0.576	0.703595
Mediterranean	Clostridioides difficile 002 P50 2011	RelAbundance	CRC	Healthy	22	68	493	0.0169	0.0464299
Mediterranean	Clostridium beijerinckii G117	RelAbundance	CRC	Healthy	3	9	12	0.864	0.894113
Mediterranean	Clostridium botulinum A2 str Kyoto	RelAbundance	CRC	Healthy	11	24	55	0.00523	0.0196954
Mediterranean	Clostridium butyricum 5521	RelAbundance	CRC	Healthy	3	8	0	0.0121	0.0360664
Mediterranean	Coprococcus eutactus ATCC 27759	RelAbundance	CRC	Healthy	16	78	362	0.00852	0.0293087
Mediterranean	Cronobacter sakazakii 2151	RelAbundance	CRC	Healthy	1	9	0	0.2	0.319669
Mediterranean	Dorea formicigenerans 4 6 53AFAA	RelAbundance	CRC	Healthy	26	91	837	0.0235	0.0574114
Mediterranean	Dorea longicatena DSM 13814	RelAbundance	CRC	Healthy	25	100	586	4.22e-05	0.000651568
Mediterranean	Enterobacter aerogenes EA1509E	RelAbundance	CRC	Healthy	2	5	3	0.571	0.70193
Mediterranean	Enterobacter cloacae ERR2221114	RelAbundance	CRC	Healthy	10	45	216	0.855	0.887177
Mediterranean	Enterobacter hormaechei ATCC 49162	RelAbundance	CRC	Healthy	14	62	393	0.587	0.708168
Mediterranean	Enterobacter roggenkampii 35734	RelAbundance	CRC	Healthy	8	41	123	0.279	0.410263
Mediterranean	Escherichia coli 042	RelAbundance	CRC	Healthy	26	104	1547	0.258	0.38675
Mediterranean	Eubacterium hallii DSM 3353	RelAbundance	CRC	Healthy	24	82	457	7.05e-05	0.000938379
Mediterranean	Haemophilus parainfluenzae 215035 2 ISO5	RelAbundance	CRC	Healthy	12	77	248	0.0103	0.0327226
Mediterranean	Klebsiella pneumoniae 1162281	RelAbundance	CRC	Healthy	24	103	570	4.16e-05	0.000651568
Mediterranean	Klebsiella quasipneumoniae 700603	RelAbundance	CRC	Healthy	12	46	110	0.000975	0.00536567
Mediterranean	Klebsiella variicola KV321 ZB100000	RelAbundance	CRC	Healthy	9	45	103	0.0197	0.0503589
Mediterranean	Kluyvera ascorbata ATCC 33433	RelAbundance	CRC	Healthy	4	5	10	1	1
Mediterranean	Megasphaera elsdenii DSM 20460	RelAbundance	CRC	Healthy	17	71	270	0.000432	0.00320677
Mediterranean	Odoribacter splanchnicus 1651 6 DSM 20712	RelAbundance	CRC	Healthy	25	96	1499	0.056	0.110286
Mediterranean	Parabacteroides chinchillae DSM 29073	RelAbundance	CRC	Healthy	22	54	398	0.0251	0.0594393
Mediterranean	Parabacteroides distasonis ATCC 8503	RelAbundance	CRC	Healthy	25	104	1695	0.0187	0.049271
Mediterranean	Parabacteroides goldsteinii CL02T12C30	RelAbundance	CRC	Healthy	25	80	1039	0.772	0.833544
Mediterranean	Parabacteroides johnsonii CL02T12C29	RelAbundance	CRC	Healthy	24	74	911	0.853	0.887177
Mediterranean	Parabacteroides merdae ATCC 43184	RelAbundance	CRC	Healthy	26	90	1326	0.303	0.438045
Mediterranean	Paraprevotella clara YIT 11840	RelAbundance	CRC	Healthy	24	85	705	0.0215	0.0537152
Mediterranean	Paraprevotella xylaniphila YIT 11841	RelAbundance	CRC	Healthy	24	73	979	0.391	0.53143
Mediterranean	Phascolarctobacterium succinatutens YIT 12067	RelAbundance	CRC	Healthy	7	9	13	0.0549	0.110286
Mediterranean	Prevotella baroniae DSM 16972 JCM 13447	RelAbundance	CRC	Healthy	19	79	233	3.39e-06	0.000155558
Mediterranean	Prevotella bivia DSM 20514	RelAbundance	CRC	Healthy	21	63	563	0.311	0.447933
Mediterranean	Prevotella copri CB7 DSM 18205	RelAbundance	CRC	Healthy	26	101	541	4.03e-06	0.000155558
Mediterranean	Prevotella corporis DSM 18810	RelAbundance	CRC	Healthy	20	78	590	0.0948	0.168243
Mediterranean	Prevotella denticola CRIS 18C A	RelAbundance	CRC	Healthy	21	76	468	0.0039	0.0161871
Mediterranean	Prevotella enoeca JCM 12259	RelAbundance	CRC	Healthy	20	55	265	0.000653	0.0044612
Mediterranean	Prevotella intermedia 17	RelAbundance	CRC	Healthy	22	83	923	0.94	0.961166
Mediterranean	Prevotella melaninogenica ATCC 25845	RelAbundance	CRC	Healthy	23	85	639	0.0112	0.0341755
Mediterranean	Prevotella nigrescens ATCC 33563	RelAbundance	CRC	Healthy	19	61	411	0.0575	0.110698
Mediterranean	Prevotella ruminicola 23	RelAbundance	CRC	Healthy	21	78	762	0.629	0.733517
Mediterranean	Prevotella veroralis DSM 19559	RelAbundance	CRC	Healthy	17	64	232	0.000303	0.00254843
Mediterranean	Pseudomonas aeruginosa 152504	RelAbundance	CRC	Healthy	1	2	0	0.667	0.748436
Mediterranean	Ruminococcus lactaris ATCC 29176	RelAbundance	CRC	Healthy	23	69	364	0.00011	0.00121314
Mediterranean	Salmonella enterica enterica sv Typhimurium LT2	RelAbundance	CRC	Healthy	25	95	1226	0.806	0.859436
Mediterranean	Staphylococcus aureus 04 02981	RelAbundance	CRC	Healthy	12	39	144	0.0459	0.0947455
Mediterranean	Streptococcus salivarius 57 I	RelAbundance	CRC	Healthy	9	57	231	0.64	0.737433
Vegan	Acidaminococcus fermentans DSM 20731	RelAbundance	CRC	Healthy	10	34	104	0.066	0.123632
Vegan	Acidaminococcus intestini RyC MR95	RelAbundance	CRC	Healthy	18	56	277	0.00432	0.0177683
Vegan	Acidaminococcus massiliensis Marseille P2828	RelAbundance	CRC	Healthy	24	79	890	0.654	0.745773
Vegan	Acinetobacter baumannii 1656 2	RelAbundance	CRC	Healthy	8	18	58	0.461	0.60629
Vegan	Alcaligenes faecalis NBIB 017	RelAbundance	CRC	Healthy	25	87	873	0.135	0.2316
Vegan	Alistipes finegoldii DSM 17242	RelAbundance	CRC	Healthy	24	95	1083	0.708	0.78985
Vegan	Alistipes indistinctus ERR2221377	RelAbundance	CRC	Healthy	21	81	929	0.519	0.664458
Vegan	Alistipes senegalensis JC50	RelAbundance	CRC	Healthy	24	68	978	0.151	0.251775
Vegan	Alistipes shahii ERR2221103	RelAbundance	CRC	Healthy	25	83	1008	0.833	0.882134
Vegan	Alloprevotella rava F0323	RelAbundance	CRC	Healthy	19	46	422	0.836	0.884099
Vegan	Anaerofustis stercorihominis DSM 17244	RelAbundance	CRC	Healthy	26	102	1430	0.54	0.687921
Vegan	Anaerostipes hadrus DSM 3319	RelAbundance	CRC	Healthy	17	70	350	0.00886	0.0299737
Vegan	Anaerotruncus colihominis DSM 17241	RelAbundance	CRC	Healthy	20	53	355	0.0309	0.0701612
Vegan	Ardenticatena maritima 110S	RelAbundance	CRC	Healthy	22	63	696	0.98	0.990262
Vegan	Auritidibacter ignavus IMMIB L 1656	RelAbundance	CRC	Healthy	26	103	1442	0.547	0.689286
Vegan	Bacillus cereus 03BB102	RelAbundance	CRC	Healthy	11	29	170	0.765	0.830633
Vegan	Bacteroides acidifaciens 1e8A	RelAbundance	CRC	Healthy	24	79	1019	0.582	0.708168
Vegan	Bacteroides caccae ATCC 43185	RelAbundance	CRC	Healthy	25	99	826	0.0105	0.0332213
Vegan	Bacteroides cellulosilyticus CL02T12C19	RelAbundance	CRC	Healthy	23	83	1010	0.673	0.75298
Vegan	Bacteroides coprocola M16 DSM 17136	RelAbundance	CRC	Healthy	24	95	1009	0.387	0.527852
Vegan	Bacteroides coprophilus DSM 18228	RelAbundance	CRC	Healthy	24	90	229	3.39e-09	6.5427e-07
Vegan	Bacteroides dorei CL02T00C15	RelAbundance	CRC	Healthy	26	102	906	0.013	0.0386
Vegan	Bacteroides eggerthii 1 2 48FAA	RelAbundance	CRC	Healthy	26	86	1458	0.0193	0.0499987
Vegan	Bacteroides faecis ERR1022362	RelAbundance	CRC	Healthy	25	100	1255	0.978	0.990262
Vegan	Bacteroides fragilis 3 1 12	RelAbundance	CRC	Healthy	26	104	1485	0.441	0.588
Vegan	Bacteroides gallinarum DSM 18171 JCM 13658	RelAbundance	CRC	Healthy	22	55	771	0.062	0.119065
Vegan	Bacteroides helcogenes P 36 108	RelAbundance	CRC	Healthy	21	49	640	0.11	0.192562
Vegan	Bacteroides nordii CL02T12C05	RelAbundance	CRC	Healthy	25	95	986	0.194	0.315966
Vegan	Bacteroides ovatus 3 8 47FAA	RelAbundance	CRC	Healthy	26	104	1508	0.365	0.501388
Vegan	Bacteroides salanitronis DSM 18170	RelAbundance	CRC	Healthy	23	84	698	0.0425	0.0894005
Vegan	Bacteroides salyersiae CL02T12C01	RelAbundance	CRC	Healthy	25	102	833	0.00743	0.026433
Vegan	Bacteroides stercoris ATCC 43183	RelAbundance	CRC	Healthy	26	98	1383	0.505	0.648686
Vegan	Bacteroides thetaiotaomicron 3731	RelAbundance	CRC	Healthy	26	103	882	0.00736	0.0264275
Vegan	Bacteroides uniformis ATCC 8492	RelAbundance	CRC	Healthy	26	103	1139	0.241	0.369885
Vegan	Bacteroides vulgatus ATCC 8482	RelAbundance	CRC	Healthy	26	103	1338	0.998	1
Vegan	Bacteroides xylanisolvens CL03T12C04	RelAbundance	CRC	Healthy	26	104	971	0.0268	0.0619449
Vegan	Barnesiella intestinihominis ERR1203957	RelAbundance	CRC	Healthy	22	81	1086	0.118	0.205171
Vegan	Barnesiella viscericola DSM 18177	RelAbundance	CRC	Healthy	21	49	461	0.5	0.643333
Vegan	Bifidobacterium adolescentis ATCC 15703	RelAbundance	CRC	Healthy	14	91	334	0.00435	0.0177683
Vegan	Bifidobacterium catenulatum DSM 16992	RelAbundance	CRC	Healthy	17	73	586	0.726	0.801777
Vegan	Bifidobacterium longum BG7	RelAbundance	CRC	Healthy	26	100	738	0.000712	0.00458053
Vegan	Bifidobacterium pseudocatenulatum DSM 20438	RelAbundance	CRC	Healthy	14	67	448	0.798	0.856706
Vegan	Blautia coccoides YL58	RelAbundance	CRC	Healthy	24	74	988	0.411	0.556433
Vegan	Blautia hansenii VPI C7 24 DSM 20583	RelAbundance	CRC	Healthy	15	45	232	0.0728	0.134454
Vegan	Blautia luti DSM 14534	RelAbundance	CRC	Healthy	22	78	674	0.127	0.219338
Vegan	Blautia obeum ATCC 29174	RelAbundance	CRC	Healthy	26	93	603	9.86e-05	0.00115332
Vegan	Blautia torques ERR1022291	RelAbundance	CRC	Healthy	24	88	1178	0.389	0.529644
Vegan	Blautia wexlerae AGR2146	RelAbundance	CRC	Healthy	26	96	1250	0.993	1
Vegan	Catenibacterium mitsuokai DSM 15897	RelAbundance	CRC	Healthy	17	51	313	0.0892	0.161649
Vegan	Citrobacter freundii 4 7 47CFAA	RelAbundance	CRC	Healthy	10	23	95	0.451	0.597208
Vegan	Clostridioides difficile 002 P50 2011	RelAbundance	CRC	Healthy	22	68	451	0.00537	0.0201245
Vegan	Clostridium acetobutylicum ATCC 824	RelAbundance	CRC	Healthy	22	71	498	0.0107	0.0337159
Vegan	Clostridium baratii 796 15	RelAbundance	CRC	Healthy	2	7	10	0.5	0.643333
Vegan	Clostridium beijerinckii G117	RelAbundance	CRC	Healthy	3	9	5	0.145	0.24441
Vegan	Clostridium botulinum A2 str Kyoto	RelAbundance	CRC	Healthy	11	24	46	0.00157	0.00776949
Vegan	Clostridium butyricum 5521	RelAbundance	CRC	Healthy	3	8	0	0.0121	0.0360664
Vegan	Clostridium hathewayi 12489931	RelAbundance	CRC	Healthy	25	61	867	0.323	0.457534
Vegan	Clostridium perfringens ATCC 13124	RelAbundance	CRC	Healthy	20	48	292	0.0108	0.0338927
Vegan	Clostridium scindens ATCC 35704	RelAbundance	CRC	Healthy	26	78	1086	0.591	0.708564
Vegan	Collinsella aerofaciens ATCC 25986	RelAbundance	CRC	Healthy	25	92	937	0.158	0.261751
Vegan	Comamonas aquatica CJG	RelAbundance	CRC	Healthy	5	20	75	0.097	0.171752
Vegan	Coprobacter fastidiosus NSB1	RelAbundance	CRC	Healthy	14	30	203	0.871	0.898947
Vegan	Coprococcus catus ERR2221258	RelAbundance	CRC	Healthy	26	90	1132	0.804	0.859436
Vegan	Coprococcus comes ATCC 27758	RelAbundance	CRC	Healthy	25	97	912	0.0571	0.110698
Vegan	Coprococcus eutactus ATCC 27759	RelAbundance	CRC	Healthy	16	78	351	0.00612	0.0223917
Vegan	Cronobacter sakazakii 2151	RelAbundance	CRC	Healthy	1	9	0	0.2	0.319669
Vegan	Dialister succinatiphilus YIT 11850	RelAbundance	CRC	Healthy	23	74	790	0.608	0.719902
Vegan	Dielma fastidiosa JC13	RelAbundance	CRC	Healthy	22	85	997	0.635	0.737433
Vegan	Dorea formicigenerans 4 6 53AFAA	RelAbundance	CRC	Healthy	26	91	785	0.00916	0.0306126
Vegan	Dorea longicatena DSM 13814	RelAbundance	CRC	Healthy	25	100	573	2.97e-05	0.000587908
Vegan	Eisenbergiella nov ERR2221109	RelAbundance	CRC	Healthy	22	59	599	0.599	0.713623
Vegan	Enterobacter aerogenes EA1509E	RelAbundance	CRC	Healthy	2	5	4	0.857	0.888059
Vegan	Enterobacter cloacae ERR2221114	RelAbundance	CRC	Healthy	10	45	213	0.805	0.859436
Vegan	Enterobacter hormaechei ATCC 49162	RelAbundance	CRC	Healthy	14	62	387	0.533	0.680126
Vegan	Enterobacter roggenkampii 35734	RelAbundance	CRC	Healthy	8	41	117	0.213	0.33627
Vegan	Escherichia coli 042	RelAbundance	CRC	Healthy	26	104	1478	0.465	0.609474
Vegan	Eubacterium biforme DSM 3989	RelAbundance	CRC	Healthy	16	42	201	0.0182	0.0487861
Vegan	Eubacterium eligens ATCC 27750	RelAbundance	CRC	Healthy	23	97	964	0.314	0.450096
Vegan	Eubacterium hallii DSM 3353	RelAbundance	CRC	Healthy	24	82	440	4.08e-05	0.000651568
Vegan	Eubacterium ramulus ATCC 29099	RelAbundance	CRC	Healthy	24	73	905	0.812	0.86464
Vegan	Eubacterium ventriosum ATCC 27560	RelAbundance	CRC	Healthy	15	56	414	0.938	0.960393
Vegan	Faecalibacterium cf ERR1022328	RelAbundance	CRC	Healthy	24	100	1131	0.665	0.748436
Vegan	Faecalibacterium prausnitzii A2 165	RelAbundance	CRC	Healthy	26	104	1221	0.448	0.595277
Vegan	Flavonifractor plautii ATCC 29863	RelAbundance	CRC	Healthy	26	93	1161	0.76	0.828701
Vegan	Haemophilus parainfluenzae 215035 2 ISO5	RelAbundance	CRC	Healthy	12	77	264	0.0177	0.0482841
Vegan	Intestinimonas butyriciproducens AF211	RelAbundance	CRC	Healthy	22	81	920	0.819	0.869695
Vegan	Klebsiella pneumoniae 1162281	RelAbundance	CRC	Healthy	24	103	563	3.45e-05	0.000651568
Vegan	Klebsiella quasipneumoniae 700603	RelAbundance	CRC	Healthy	12	46	107	0.000765	0.00488083
Vegan	Klebsiella variicola KV321 ZB100000	RelAbundance	CRC	Healthy	9	45	108	0.0273	0.0629122
Vegan	Kluyvera ascorbata ATCC 33433	RelAbundance	CRC	Healthy	4	5	10	1	1
Vegan	Lactobacillus ruminis ATCC 25644	RelAbundance	CRC	Healthy	11	69	168	0.0032	0.0143244
Vegan	Megasphaera elsdenii DSM 20460	RelAbundance	CRC	Healthy	17	71	271	0.00045	0.00330857
Vegan	Muribaculum intestinale YL27	RelAbundance	CRC	Healthy	21	46	478	0.952	0.970864
Vegan	Odoribacter splanchnicus 1651 6 DSM 20712	RelAbundance	CRC	Healthy	25	96	1466	0.0892	0.161649
Vegan	Oscillibacter nov ERR1022355	RelAbundance	CRC	Healthy	22	82	944	0.741	0.816051
Vegan	Parabacteroides chinchillae DSM 29073	RelAbundance	CRC	Healthy	22	54	391	0.0204	0.0518053
Vegan	Parabacteroides distasonis ATCC 8503	RelAbundance	CRC	Healthy	25	104	1582	0.0935	0.167476
Vegan	Parabacteroides goldsteinii CL02T12C30	RelAbundance	CRC	Healthy	25	80	988	0.931	0.955761
Vegan	Parabacteroides johnsonii CL02T12C29	RelAbundance	CRC	Healthy	24	74	883	0.97	0.985316
Vegan	Parabacteroides merdae ATCC 43184	RelAbundance	CRC	Healthy	26	90	1279	0.473	0.618908
Vegan	Paraprevotella clara YIT 11840	RelAbundance	CRC	Healthy	24	85	698	0.0187	0.049271
Vegan	Paraprevotella xylaniphila YIT 11841	RelAbundance	CRC	Healthy	24	73	520	0.00296	0.0133633
Vegan	Phascolarctobacterium faecium DSM 14760	RelAbundance	CRC	Healthy	10	15	86	0.567	0.70193
Vegan	Phascolarctobacterium succinatutens YIT 12067	RelAbundance	CRC	Healthy	7	9	13	0.0549	0.110286
Vegan	Prevotella baroniae DSM 16972 JCM 13447	RelAbundance	CRC	Healthy	19	79	211	1.27e-06	8.91309e-05
Vegan	Prevotella bivia DSM 20514	RelAbundance	CRC	Healthy	21	63	406	0.00843	0.0293087
Vegan	Prevotella bryantii B14	RelAbundance	CRC	Healthy	20	79	827	0.75	0.821277
Vegan	Prevotella buccalis ATCC 35310	RelAbundance	CRC	Healthy	22	81	863	0.825	0.874863
Vegan	Prevotella copri CB7 DSM 18205	RelAbundance	CRC	Healthy	26	101	527	2.69e-06	0.000155558
Vegan	Prevotella corporis DSM 18810	RelAbundance	CRC	Healthy	20	78	545	0.0387	0.0823041
Vegan	Prevotella dentalis DSM 3688	RelAbundance	CRC	Healthy	22	74	849	0.764	0.830633
Vegan	Prevotella denticola CRIS 18C A	RelAbundance	CRC	Healthy	21	76	424	0.00107	0.00569683
Vegan	Prevotella enoeca JCM 12259	RelAbundance	CRC	Healthy	20	55	244	0.000252	0.00246258
Vegan	Prevotella histicola F0411	RelAbundance	CRC	Healthy	14	49	361	0.775	0.835615
Vegan	Prevotella intermedia 17	RelAbundance	CRC	Healthy	22	83	611	0.0176	0.0481816
Vegan	Prevotella melaninogenica ATCC 25845	RelAbundance	CRC	Healthy	23	85	597	0.00435	0.0177683
Vegan	Prevotella multiformis DSM 16608	RelAbundance	CRC	Healthy	20	68	727	0.643	0.738685
Vegan	Prevotella nigrescens ATCC 33563	RelAbundance	CRC	Healthy	19	61	392	0.0345	0.0750254
Vegan	Prevotella oris C735	RelAbundance	CRC	Healthy	20	66	574	0.382	0.521954
Vegan	Prevotella ruminicola 23	RelAbundance	CRC	Healthy	21	78	471	0.00294	0.0133511
Vegan	Prevotella sp C561	RelAbundance	CRC	Healthy	25	93	1324	0.289	0.420958
Vegan	Prevotella veroralis DSM 19559	RelAbundance	CRC	Healthy	17	64	214	0.000133	0.00144614
Vegan	Pseudomonas aeruginosa 152504	RelAbundance	CRC	Healthy	1	2	0	0.667	0.748436
Vegan	Roseburia faecis ERR1022321	RelAbundance	CRC	Healthy	26	101	1331	0.917	0.942642
Vegan	Roseburia hominis A2 183	RelAbundance	CRC	Healthy	26	93	1317	0.489	0.633635
Vegan	Roseburia intestinalis ERR1022474	RelAbundance	CRC	Healthy	26	102	1143	0.28	0.410951
Vegan	Ruminococcus albus 7	RelAbundance	CRC	Healthy	19	71	585	0.379	0.518773
Vegan	Ruminococcus bicirculans 80 3	RelAbundance	CRC	Healthy	22	68	834	0.422	0.567568
Vegan	Ruminococcus champanellensis 18P13	RelAbundance	CRC	Healthy	18	45	366	0.561	0.697411
Vegan	Ruminococcus lactaris ATCC 29176	RelAbundance	CRC	Healthy	23	69	337	3.93e-05	0.000651568
Vegan	Ruthenibacterium lactatiformans 585 1	RelAbundance	CRC	Healthy	23	73	751	0.45	0.596907
Vegan	Salmonella enterica enterica sv Typhimurium LT2	RelAbundance	CRC	Healthy	25	95	833	0.0222	0.0552852
Vegan	Selenomonas ruminantium AC2024	RelAbundance	CRC	Healthy	7	29	109	0.784	0.844139
Vegan	Selenomonas sputigena ATCC 35185	RelAbundance	CRC	Healthy	13	30	193	0.969	0.985316
Vegan	Staphylococcus aureus 04 02981	RelAbundance	CRC	Healthy	12	39	133	0.0242	0.0587497
Vegan	Streptococcus pleomorphus DSM 20574	RelAbundance	CRC	Healthy	21	66	662	0.762	0.829709
Vegan	Streptococcus salivarius 57 I	RelAbundance	CRC	Healthy	9	57	231	0.64	0.737433
Vegan	Subdoligranulum sp 4 3 54A2FAA	RelAbundance	CRC	Healthy	19	71	619	0.587	0.708168
Vegan	Subdoligranulum variabile DSM 15176	RelAbundance	CRC	Healthy	19	69	395	0.00837	0.0293087
Vegan	Succinivibrio dextrinosolvens H5	RelAbundance	CRC	Healthy	9	15	84	0.347	0.482674
Vegan	Sutterella wadsworthensis 2 1 59BFAA	RelAbundance	CRC	Healthy	19	52	465	0.711	0.792052

## Sheet: S6 species_lfc_results
sample_id	diet	Species	0hr	48hr	lfc	group
di_p1	Gluten_Free	Acidaminococcus massiliensis Marseille P2828	0.0268087	1.85024e-265	-14.7105	CRC
di_p1	High_fat	Acidaminococcus massiliensis Marseille P2828	0.0268087	4.36e-123	-14.7105	CRC
di_p1	High_Fiber	Acidaminococcus massiliensis Marseille P2828	0.0268087	1.74035e-293	-14.7105	CRC
di_p1	High_protein	Acidaminococcus massiliensis Marseille P2828	0.0268087	9.14464e-261	-14.7105	CRC
di_p1	Vegan	Acidaminococcus massiliensis Marseille P2828	0.0268087	7.82407e-293	-14.7105	CRC
di_p1	Gluten_Free	Acinetobacter baumannii 1656 2	0.00026097	0.00366117	3.80523	CRC
di_p1	High_fat	Acinetobacter baumannii 1656 2	0.00026097	0.00366118	3.80523	CRC
di_p1	High_Fiber	Acinetobacter baumannii 1656 2	0.00026097	0.00384414	3.87556	CRC
di_p1	High_protein	Acinetobacter baumannii 1656 2	0.00026097	0.00366117	3.80523	CRC
di_p1	Mediterranean	Acinetobacter baumannii 1656 2	0.00026097	0.00366117	3.80523	CRC
di_p1	Vegan	Acinetobacter baumannii 1656 2	0.00026097	1.16874e-37	-8.03326	CRC
di_p1	Gluten_Free	Alcaligenes faecalis NBIB 017	0.00396199	0.0555833	3.81001	CRC
di_p1	High_fat	Alcaligenes faecalis NBIB 017	0.00396199	0.0555833	3.81001	CRC
di_p1	High_Fiber	Alcaligenes faecalis NBIB 017	0.00396199	0.058361	3.88037	CRC
di_p1	High_protein	Alcaligenes faecalis NBIB 017	0.00396199	0.0555833	3.81001	CRC
di_p1	Mediterranean	Alcaligenes faecalis NBIB 017	0.00396199	0.0555833	3.81001	CRC
di_p1	Vegan	Alcaligenes faecalis NBIB 017	0.00396199	0.0579962	3.87132	CRC
di_p1	Gluten_Free	Alistipes finegoldii DSM 17242	0.00366544	5.06731e-266	-11.8402	CRC
di_p1	High_fat	Alistipes finegoldii DSM 17242	0.00366544	8.47e-124	-11.8402	CRC
di_p1	High_Fiber	Alistipes finegoldii DSM 17242	0.00366544	5.30923e-293	-11.8402	CRC
di_p1	High_protein	Alistipes finegoldii DSM 17242	0.00366544	2.76537e-261	-11.8402	CRC
di_p1	Vegan	Alistipes finegoldii DSM 17242	0.00366544	2.56884e-293	-11.8402	CRC
di_p1	Gluten_Free	Alistipes indistinctus ERR2221377	0.000806633	1.11514e-266	-9.65756	CRC
di_p1	High_fat	Alistipes indistinctus ERR2221377	0.000806633	1.86e-124	-9.65756	CRC
di_p1	High_Fiber	Alistipes indistinctus ERR2221377	0.000806633	1.16847e-293	-9.65756	CRC
di_p1	High_protein	Alistipes indistinctus ERR2221377	0.000806633	6.08561e-262	-9.65756	CRC
di_p1	Vegan	Alistipes indistinctus ERR2221377	0.000806633	5.65312e-294	-9.65756	CRC
di_p1	Gluten_Free	Alistipes senegalensis JC50	0.00297743	4.11617e-266	-11.5403	CRC
di_p1	High_fat	Alistipes senegalensis JC50	0.00297743	6.88e-124	-11.5403	CRC
di_p1	High_Fiber	Alistipes senegalensis JC50	0.00297743	4.3127e-293	-11.5403	CRC
di_p1	High_protein	Alistipes senegalensis JC50	0.00297743	2.24631e-261	-11.5403	CRC
di_p1	Vegan	Alistipes senegalensis JC50	0.00297743	2.08666e-293	-11.5403	CRC
di_p1	Gluten_Free	Alistipes shahii ERR2221103	0.00105574	1.45952e-266	-10.0454	CRC
di_p1	High_fat	Alistipes shahii ERR2221103	0.00105574	2.44e-124	-10.0454	CRC
di_p1	High_Fiber	Alistipes shahii ERR2221103	0.00105574	1.52913e-293	-10.0454	CRC
di_p1	High_protein	Alistipes shahii ERR2221103	0.00105574	7.96499e-262	-10.0454	CRC
di_p1	Vegan	Alistipes shahii ERR2221103	0.00105574	7.39893e-293	-10.0454	CRC
di_p1	Gluten_Free	Alloprevotella rava F0323	0.000806633	1.11514e-266	-9.65756	CRC
di_p1	High_fat	Alloprevotella rava F0323	0.000806633	1.86e-124	-9.65756	CRC
di_p1	High_Fiber	Alloprevotella rava F0323	0.000806633	1.16847e-293	-9.65756	CRC
di_p1	High_protein	Alloprevotella rava F0323	0.000806633	6.08561e-262	-9.65756	CRC
di_p1	Vegan	Alloprevotella rava F0323	0.000806633	5.65312e-293	-9.65756	CRC
di_p1	Gluten_Free	Anaerofustis stercorihominis DSM 17244	0.0297505	1.95468e-265	-14.8607	CRC
di_p1	High_fat	Anaerofustis stercorihominis DSM 17244	0.0297505	4.72e-123	-14.8607	CRC
di_p1	High_Fiber	Anaerofustis stercorihominis DSM 17244	0.0297505	1.82458e-293	-14.8607	CRC
di_p1	High_protein	Anaerofustis stercorihominis DSM 17244	0.0297505	9.5933e-261	-14.8607	CRC
di_p1	Vegan	Anaerofustis stercorihominis DSM 17244	0.0297505	8.16026e-293	-14.8607	CRC
di_p1	Gluten_Free	Anaerostipes hadrus DSM 3319	0.00206403	1.03151e-259	-11.0119	CRC
di_p1	High_fat	Anaerostipes hadrus DSM 3319	0.00206403	3.02e-118	-11.0119	CRC
di_p1	High_Fiber	Anaerostipes hadrus DSM 3319	0.00206403	8.22766e-293	-11.0119	CRC
di_p1	High_protein	Anaerostipes hadrus DSM 3319	0.00206403	3.24312e-255	-11.0119	CRC
di_p1	Vegan	Anaerostipes hadrus DSM 3319	0.00206403	2.94148e-289	-11.0119	CRC
di_p1	Gluten_Free	Anaerotruncus colihominis DSM 17241	0.000652424	4.28101e-260	-9.35188	CRC
di_p1	High_fat	Anaerotruncus colihominis DSM 17241	0.000652424	1.21e-118	-9.35188	CRC
di_p1	High_Fiber	Anaerotruncus colihominis DSM 17241	0.000652424	3.68226e-293	-9.35188	CRC
di_p1	High_protein	Anaerotruncus colihominis DSM 17241	0.000652424	1.33752e-255	-9.35188	CRC
di_p1	Vegan	Anaerotruncus colihominis DSM 17241	0.000652424	1.21556e-289	-9.35188	CRC
di_p1	Gluten_Free	Ardenticatena maritima 110S	0.00131671	8.65112e-267	-10.3638	CRC
di_p1	High_fat	Ardenticatena maritima 110S	0.00131671	2.09e-124	-10.3638	CRC
di_p1	High_Fiber	Ardenticatena maritima 110S	0.00131671	8.07797e-293	-10.3638	CRC
di_p1	High_protein	Ardenticatena maritima 110S	0.00131671	4.24584e-262	-10.3638	CRC
di_p1	Vegan	Ardenticatena maritima 110S	0.00131671	3.6116e-293	-10.3638	CRC
di_p1	Gluten_Free	Auritidibacter ignavus IMMIB L 1656	0.00325026	4.49335e-266	-11.6668	CRC
di_p1	High_fat	Auritidibacter ignavus IMMIB L 1656	0.00325026	7.51e-124	-11.6668	CRC
di_p1	High_Fiber	Auritidibacter ignavus IMMIB L 1656	0.00325026	4.70746e-294	-11.6668	CRC
di_p1	High_protein	Auritidibacter ignavus IMMIB L 1656	0.00325026	2.45214e-261	-11.6668	CRC
di_p1	Vegan	Auritidibacter ignavus IMMIB L 1656	0.00325026	2.27787e-293	-11.6668	CRC
di_p1	Gluten_Free	Bacillus cereus 03BB102	0.00355868	0.0499251	3.80998	CRC
di_p1	High_fat	Bacillus cereus 03BB102	0.00355868	0.0499251	3.80998	CRC
di_p1	High_Fiber	Bacillus cereus 03BB102	0.00355868	0.0524201	3.88033	CRC
di_p1	High_protein	Bacillus cereus 03BB102	0.00355868	0.0499251	3.80998	CRC
di_p1	Mediterranean	Bacillus cereus 03BB102	0.00355868	0.0499251	3.80998	CRC
di_p1	Vegan	Bacillus cereus 03BB102	0.00355868	0.0520924	3.87128	CRC
di_p1	Gluten_Free	Bacteroides acidifaciens 1e8A	0.00156582	2.16468e-266	-10.6136	CRC
di_p1	High_fat	Bacteroides acidifaciens 1e8A	0.00156582	3.62e-124	-10.6136	CRC
di_p1	High_Fiber	Bacteroides acidifaciens 1e8A	0.00156582	2.26776e-293	-10.6136	CRC
di_p1	High_protein	Bacteroides acidifaciens 1e8A	0.00156582	1.18132e-261	-10.6136	CRC
di_p1	Vegan	Bacteroides acidifaciens 1e8A	0.00156582	1.09737e-293	-10.6136	CRC
di_p1	Gluten_Free	Bacteroides caccae ATCC 43185	0.00161327	4.03569e-232	-10.6567	CRC
di_p1	High_fat	Bacteroides caccae ATCC 43185	0.00161327	8.26e-98	-10.6567	CRC
di_p1	High_Fiber	Bacteroides caccae ATCC 43185	0.00161327	8.20536e-281	-10.6567	CRC
di_p1	High_protein	Bacteroides caccae ATCC 43185	0.00161327	9.2075e-219	-10.6567	CRC
di_p1	Mediterranean	Bacteroides caccae ATCC 43185	0.00161327	1.52216e-293	-10.6567	CRC
di_p1	Vegan	Bacteroides caccae ATCC 43185	0.00161327	2.71447e-249	-10.6567	CRC
di_p1	Gluten_Free	Bacteroides cellulosilyticus CL02T12C19	0.0706516	4.26341e-162	-16.1085	CRC
di_p1	High_fat	Bacteroides cellulosilyticus CL02T12C19	0.0706516	3.51e-75	-16.1085	CRC
di_p1	High_Fiber	Bacteroides cellulosilyticus CL02T12C19	0.0706516	4.57434e-195	-16.1085	CRC
di_p1	High_protein	Bacteroides cellulosilyticus CL02T12C19	0.0706516	2.97315e-159	-16.1085	CRC
di_p1	Mediterranean	Bacteroides cellulosilyticus CL02T12C19	0.0706516	2.69287e-204	-16.1085	CRC
di_p1	Vegan	Bacteroides cellulosilyticus CL02T12C19	0.0706516	4.81626e-180	-16.1085	CRC
di_p1	Gluten_Free	Bacteroides coprocola M16 DSM 17136	0.0175087	3.49454e-254	-14.0959	CRC
di_p1	High_fat	Bacteroides coprocola M16 DSM 17136	0.0175087	1.91e-114	-14.0959	CRC
di_p1	High_Fiber	Bacteroides coprocola M16 DSM 17136	0.0175087	1.93145e-293	-14.0959	CRC
di_p1	High_protein	Bacteroides coprocola M16 DSM 17136	0.0175087	1.33997e-246	-14.0959	CRC
di_p1	Mediterranean	Bacteroides coprocola M16 DSM 17136	0.0175087	1.92686e-293	-14.0959	CRC
di_p1	Vegan	Bacteroides coprocola M16 DSM 17136	0.0175087	1.69836e-279	-14.0959	CRC
di_p1	Gluten_Free	Bacteroides coprophilus DSM 18228	0.00073546	1.46789e-255	-9.52446	CRC
di_p1	High_fat	Bacteroides coprophilus DSM 18228	0.00073546	8.04e-116	-9.52446	CRC
di_p1	High_Fiber	Bacteroides coprophilus DSM 18228	0.00073546	8.11312e-293	-9.52446	CRC
di_p1	High_protein	Bacteroides coprophilus DSM 18228	0.00073546	5.62859e-248	-9.52446	CRC
di_p1	Mediterranean	Bacteroides coprophilus DSM 18228	0.00073546	9.88131e-293	-9.52446	CRC
di_p1	Vegan	Bacteroides coprophilus DSM 18228	0.00073546	7.13405e-281	-9.52446	CRC
di_p1	Gluten_Free	Bacteroides dorei CL02T00C15	0.00154209	9.30562e-164	-10.5916	CRC
di_p1	High_fat	Bacteroides dorei CL02T00C15	0.00154209	7.66e-77	-10.5916	CRC
di_p1	High_Fiber	Bacteroides dorei CL02T00C15	0.00154209	9.98429e-197	-10.5916	CRC
di_p1	High_protein	Bacteroides dorei CL02T00C15	0.00154209	6.48942e-161	-10.5916	CRC
di_p1	Mediterranean	Bacteroides dorei CL02T00C15	0.00154209	5.87764e-206	-10.5916	CRC
di_p1	Vegan	Bacteroides dorei CL02T00C15	0.00154209	1.05123e-181	-10.5916	CRC
di_p1	Gluten_Free	Bacteroides eggerthii 1 2 48FAA	0.00117436	3.73099e-162	-10.1989	CRC
di_p1	High_fat	Bacteroides eggerthii 1 2 48FAA	0.00117436	3.63e-76	-10.1989	CRC
di_p1	High_Fiber	Bacteroides eggerthii 1 2 48FAA	0.00117436	9.00172e-195	-10.1989	CRC
di_p1	High_protein	Bacteroides eggerthii 1 2 48FAA	0.00117436	2.42634e-159	-10.1989	CRC
di_p1	Mediterranean	Bacteroides eggerthii 1 2 48FAA	0.00117436	6.64429e-204	-10.1989	CRC
di_p1	Vegan	Bacteroides eggerthii 1 2 48FAA	0.00117436	6.55278e-180	-10.1989	CRC
di_p1	Gluten_Free	Bacteroides faecis ERR1022362	0.00151837	2.09908e-266	-10.5693	CRC
di_p1	High_fat	Bacteroides faecis ERR1022362	0.00151837	3.51e-124	-10.5693	CRC
di_p1	High_Fiber	Bacteroides faecis ERR1022362	0.00151837	2.19909e-293	-10.5693	CRC
di_p1	High_protein	Bacteroides faecis ERR1022362	0.00151837	1.14553e-261	-10.5693	CRC
di_p1	Vegan	Bacteroides faecis ERR1022362	0.00151837	1.06412e-293	-10.5693	CRC
di_p1	Gluten_Free	Bacteroides fragilis 3 1 12	0.0184577	5.86406e-161	-14.172	CRC
di_p1	High_fat	Bacteroides fragilis 3 1 12	0.0184577	5.71e-75	-14.172	CRC
di_p1	High_Fiber	Bacteroides fragilis 3 1 12	0.0184577	1.41482e-193	-14.172	CRC
di_p1	High_protein	Bacteroides fragilis 3 1 12	0.0184577	3.81352e-158	-14.172	CRC
di_p1	Mediterranean	Bacteroides fragilis 3 1 12	0.0184577	1.04429e-202	-14.172	CRC
di_p1	Vegan	Bacteroides fragilis 3 1 12	0.0184577	1.02991e-178	-14.172	CRC
di_p1	Gluten_Free	Bacteroides gallinarum DSM 18171 JCM 13658	0.00134043	1.8531e-266	-10.3896	CRC
di_p1	High_fat	Bacteroides gallinarum DSM 18171 JCM 13658	0.00134043	3.1e-124	-10.3896	CRC
di_p1	High_Fiber	Bacteroides gallinarum DSM 18171 JCM 13658	0.00134043	1.94168e-294	-10.3896	CRC
di_p1	High_protein	Bacteroides gallinarum DSM 18171 JCM 13658	0.00134043	1.01129e-261	-10.3896	CRC
di_p1	Vegan	Bacteroides gallinarum DSM 18171 JCM 13658	0.00134043	9.39415e-294	-10.3896	CRC
di_p1	Gluten_Free	Bacteroides helcogenes P 36 108	0.00047449	6.55963e-267	-8.89327	CRC
di_p1	High_fat	Bacteroides helcogenes P 36 108	0.00047449	1.1e-124	-8.89327	CRC
di_p1	High_Fiber	Bacteroides helcogenes P 36 108	0.00047449	6.87245e-293	-8.89327	CRC
di_p1	High_protein	Bacteroides helcogenes P 36 108	0.00047449	3.57977e-262	-8.89327	CRC
di_p1	Vegan	Bacteroides helcogenes P 36 108	0.00047449	3.32536e-293	-8.89327	CRC
di_p1	Gluten_Free	Bacteroides nordii CL02T12C05	0.000593113	0.00832085	3.8081	CRC
di_p1	High_fat	Bacteroides nordii CL02T12C05	0.000593113	0.00832085	3.8081	CRC
di_p1	High_Fiber	Bacteroides nordii CL02T12C05	0.000593113	9.13694e-262	-9.21459	CRC
di_p1	High_protein	Bacteroides nordii CL02T12C05	0.000593113	0.00832085	3.8081	CRC
di_p1	Mediterranean	Bacteroides nordii CL02T12C05	0.000593113	0.00832085	3.8081	CRC
di_p1	Vegan	Bacteroides nordii CL02T12C05	0.000593113	0.00868206	3.8694	CRC
di_p1	Gluten_Free	Bacteroides ovatus 3 8 47FAA	0.011281	6.80742e-163	-13.4617	CRC
di_p1	High_fat	Bacteroides ovatus 3 8 47FAA	0.011281	5.61e-76	-13.4617	CRC
di_p1	High_Fiber	Bacteroides ovatus 3 8 47FAA	0.011281	7.30389e-196	-13.4617	CRC
di_p1	High_protein	Bacteroides ovatus 3 8 47FAA	0.011281	4.74726e-160	-13.4617	CRC
di_p1	Mediterranean	Bacteroides ovatus 3 8 47FAA	0.011281	4.29972e-205	-13.4617	CRC
di_p1	Vegan	Bacteroides ovatus 3 8 47FAA	0.011281	7.69017e-181	-13.4617	CRC
di_p1	Gluten_Free	Bacteroides salanitronis DSM 18170	0.000593113	8.19954e-267	-9.21459	CRC
di_p1	High_fat	Bacteroides salanitronis DSM 18170	0.000593113	1.37e-124	-9.21459	CRC
di_p1	High_Fiber	Bacteroides salanitronis DSM 18170	0.000593113	8.5918e-293	-9.21459	CRC
di_p1	High_protein	Bacteroides salanitronis DSM 18170	0.000593113	4.47472e-262	-9.21459	CRC
di_p1	Vegan	Bacteroides salanitronis DSM 18170	0.000593113	4.1567e-293	-9.21459	CRC
di_p1	Gluten_Free	Bacteroides salyersiae CL02T12C01	0.00142347	8.5898e-164	-10.4762	CRC
di_p1	High_fat	Bacteroides salyersiae CL02T12C01	0.00142347	7.07e-77	-10.4762	CRC
di_p1	High_Fiber	Bacteroides salyersiae CL02T12C01	0.00142347	9.21627e-197	-10.4762	CRC
di_p1	High_protein	Bacteroides salyersiae CL02T12C01	0.00142347	5.99024e-161	-10.4762	CRC
di_p1	Mediterranean	Bacteroides salyersiae CL02T12C01	0.00142347	5.42552e-206	-10.4762	CRC
di_p1	Vegan	Bacteroides salyersiae CL02T12C01	0.00142347	9.70368e-182	-10.4762	CRC
di_p1	Gluten_Free	Bacteroides stercoris ATCC 43183	0.00212334	6.74593e-162	-11.0528	CRC
di_p1	High_fat	Bacteroides stercoris ATCC 43183	0.00212334	6.57e-76	-11.0528	CRC
di_p1	High_Fiber	Bacteroides stercoris ATCC 43183	0.00212334	1.62758e-194	-11.0528	CRC
di_p1	High_protein	Bacteroides stercoris ATCC 43183	0.00212334	4.38702e-159	-11.0528	CRC
di_p1	Mediterranean	Bacteroides stercoris ATCC 43183	0.00212334	1.20134e-203	-11.0528	CRC
di_p1	Vegan	Bacteroides stercoris ATCC 43183	0.00212334	1.1848e-179	-11.0528	CRC
di_p1	Gluten_Free	Bacteroides thetaiotaomicron 3731	0.00390268	2.35504e-163	-11.9306	CRC
di_p1	High_fat	Bacteroides thetaiotaomicron 3731	0.00390268	1.94e-76	-11.9306	CRC
di_p1	High_Fiber	Bacteroides thetaiotaomicron 3731	0.00390268	2.52679e-196	-11.9306	CRC
di_p1	High_protein	Bacteroides thetaiotaomicron 3731	0.00390268	1.64232e-160	-11.9306	CRC
di_p1	Mediterranean	Bacteroides thetaiotaomicron 3731	0.00390268	1.4875e-205	-11.9306	CRC
di_p1	Vegan	Bacteroides thetaiotaomicron 3731	0.00390268	2.66043e-181	-11.9306	CRC
di_p1	Gluten_Free	Bacteroides uniformis ATCC 8492	0.00575319	1.82781e-161	-12.4904	CRC
di_p1	High_fat	Bacteroides uniformis ATCC 8492	0.00575319	1.78e-75	-12.4904	CRC
di_p1	High_Fiber	Bacteroides uniformis ATCC 8492	0.00575319	4.40993e-194	-12.4904	CRC
di_p1	High_protein	Bacteroides uniformis ATCC 8492	0.00575319	1.18866e-158	-12.4904	CRC
di_p1	Mediterranean	Bacteroides uniformis ATCC 8492	0.00575319	3.25503e-203	-12.4904	CRC
di_p1	Vegan	Bacteroides uniformis ATCC 8492	0.00575319	3.2102e-179	-12.4904	CRC
di_p1	Gluten_Free	Bacteroides vulgatus ATCC 8482	0.00860014	1.18893e-265	-13.0703	CRC
di_p1	High_fat	Bacteroides vulgatus ATCC 8482	0.00860014	1.99e-123	-13.0703	CRC
di_p1	High_Fiber	Bacteroides vulgatus ATCC 8482	0.00860014	1.24564e-293	-13.0703	CRC
di_p1	High_protein	Bacteroides vulgatus ATCC 8482	0.00860014	6.48834e-261	-13.0703	CRC
di_p1	Vegan	Bacteroides vulgatus ATCC 8482	0.00860014	6.02722e-293	-13.0703	CRC
di_p1	Gluten_Free	Bacteroides xylanisolvens CL03T12C04	0.022135	1.33571e-162	-14.4341	CRC
di_p1	High_fat	Bacteroides xylanisolvens CL03T12C04	0.022135	1.1e-75	-14.4341	CRC
di_p1	High_Fiber	Bacteroides xylanisolvens CL03T12C04	0.022135	1.43313e-195	-14.4341	CRC
di_p1	High_protein	Bacteroides xylanisolvens CL03T12C04	0.022135	9.31482e-160	-14.4341	CRC
di_p1	Mediterranean	Bacteroides xylanisolvens CL03T12C04	0.022135	8.43668e-205	-14.4341	CRC
di_p1	Vegan	Bacteroides xylanisolvens CL03T12C04	0.022135	1.50892e-180	-14.4341	CRC
di_p1	Gluten_Free	Barnesiella intestinihominis ERR1203957	0.000640562	8.8555e-267	-9.32544	CRC
di_p1	High_fat	Barnesiella intestinihominis ERR1203957	0.000640562	1.48e-124	-9.32544	CRC
di_p1	High_Fiber	Barnesiella intestinihominis ERR1203957	0.000640562	9.27855e-293	-9.32544	CRC
di_p1	High_protein	Barnesiella intestinihominis ERR1203957	0.000640562	4.83269e-262	-9.32544	CRC
di_p1	Vegan	Barnesiella intestinihominis ERR1203957	0.000640562	4.48924e-293	-9.32544	CRC
di_p1	Gluten_Free	Barnesiella viscericola DSM 18177	0.000498215	6.88761e-267	-8.96352	CRC
di_p1	High_fat	Barnesiella viscericola DSM 18177	0.000498215	1.15e-124	-8.96352	CRC
di_p1	High_Fiber	Barnesiella viscericola DSM 18177	0.000498215	7.2183e-293	-8.96352	CRC
di_p1	High_protein	Barnesiella viscericola DSM 18177	0.000498215	3.75876e-262	-8.96352	CRC
di_p1	Vegan	Barnesiella viscericola DSM 18177	0.000498215	3.49163e-293	-8.96352	CRC
di_p1	Gluten_Free	Bifidobacterium catenulatum DSM 16992	0.000854082	2.2536e-264	-9.73992	CRC
di_p1	High_fat	Bifidobacterium catenulatum DSM 16992	0.000854082	2.72e-122	-9.73992	CRC
di_p1	High_Fiber	Bifidobacterium catenulatum DSM 16992	0.000854082	1.1737e-293	-9.73992	CRC
di_p1	High_protein	Bifidobacterium catenulatum DSM 16992	0.000854082	8.89818e-260	-9.73992	CRC
di_p1	Vegan	Bifidobacterium catenulatum DSM 16992	0.000854082	7.50462e-293	-9.73992	CRC
di_p1	Gluten_Free	Bifidobacterium longum BG7	0.00112691	0.0158096	3.80916	CRC
di_p1	High_fat	Bifidobacterium longum BG7	0.00112691	0.0158096	3.80916	CRC
di_p1	High_Fiber	Bifidobacterium longum BG7	0.00112691	0.0165997	3.87951	CRC
di_p1	High_protein	Bifidobacterium longum BG7	0.00112691	0.0158096	3.80916	CRC
di_p1	Mediterranean	Bifidobacterium longum BG7	0.00112691	0.0158096	3.80916	CRC
di_p1	Vegan	Bifidobacterium longum BG7	0.00112691	6.15483e-64	-10.1394	CRC
di_p1	Gluten_Free	Bifidobacterium pseudocatenulatum DSM 20438	0.000237245	6.26e-265	-7.8963	CRC
di_p1	High_fat	Bifidobacterium pseudocatenulatum DSM 20438	0.000237245	7.55e-123	-7.8963	CRC
di_p1	High_Fiber	Bifidobacterium pseudocatenulatum DSM 20438	0.000237245	3.26029e-294	-7.8963	CRC
di_p1	High_protein	Bifidobacterium pseudocatenulatum DSM 20438	0.000237245	2.47172e-260	-7.8963	CRC
di_p1	Vegan	Bifidobacterium pseudocatenulatum DSM 20438	0.000237245	2.08462e-293	-7.8963	CRC
di_p1	Gluten_Free	Blautia coccoides YL58	0.00115064	1.59071e-266	-10.1695	CRC
di_p1	High_fat	Blautia coccoides YL58	0.00115064	2.66e-124	-10.1695	CRC
di_p1	High_Fiber	Blautia coccoides YL58	0.00115064	1.66648e-293	-10.1695	CRC
di_p1	High_protein	Blautia coccoides YL58	0.00115064	8.68095e-262	-10.1695	CRC
di_p1	Vegan	Blautia coccoides YL58	0.00115064	8.064e-293	-10.1695	CRC
di_p1	Gluten_Free	Blautia hansenii VPI C7 24 DSM 20583	0.000865945	2.2849e-264	-9.7598	CRC
di_p1	High_fat	Blautia hansenii VPI C7 24 DSM 20583	0.000865945	2.76e-122	-9.7598	CRC
di_p1	High_Fiber	Blautia hansenii VPI C7 24 DSM 20583	0.000865945	1.19001e-293	-9.7598	CRC
di_p1	High_protein	Blautia hansenii VPI C7 24 DSM 20583	0.000865945	9.02177e-260	-9.7598	CRC
di_p1	Vegan	Blautia hansenii VPI C7 24 DSM 20583	0.000865945	7.60886e-293	-9.7598	CRC
di_p1	Gluten_Free	Blautia luti DSM 14534	0.00104388	6.85854e-267	-10.0291	CRC
di_p1	High_fat	Blautia luti DSM 14534	0.00104388	1.66e-124	-10.0291	CRC
di_p1	High_Fiber	Blautia luti DSM 14534	0.00104388	6.40309e-293	-10.0291	CRC
di_p1	High_protein	Blautia luti DSM 14534	0.00104388	3.36607e-262	-10.0291	CRC
di_p1	Vegan	Blautia luti DSM 14534	0.00104388	2.86325e-293	-10.0291	CRC
di_p1	Gluten_Free	Blautia obeum ATCC 29174	0.00683266	3.41466e-259	-12.7384	CRC
di_p1	High_fat	Blautia obeum ATCC 29174	0.00683266	1e-117	-12.7384	CRC
di_p1	High_Fiber	Blautia obeum ATCC 29174	0.00683266	2.72364e-293	-12.7384	CRC
di_p1	High_protein	Blautia obeum ATCC 29174	0.00683266	1.07358e-254	-12.7384	CRC
di_p1	Vegan	Blautia obeum ATCC 29174	0.00683266	9.73731e-289	-12.7384	CRC
di_p1	Gluten_Free	Blautia torques ERR1022291	0.00357054	4.93612e-266	-11.8023	CRC
di_p1	High_fat	Blautia torques ERR1022291	0.00357054	8.26e-124	-11.8023	CRC
di_p1	High_Fiber	Blautia torques ERR1022291	0.00357054	5.17139e-293	-11.8023	CRC
di_p1	High_protein	Blautia torques ERR1022291	0.00357054	2.69378e-261	-11.8023	CRC
di_p1	Vegan	Blautia torques ERR1022291	0.00357054	2.50234e-294	-11.8023	CRC
di_p1	Gluten_Free	Blautia wexlerae AGR2146	0.00268087	1.7614e-266	-11.389	CRC
di_p1	High_fat	Blautia wexlerae AGR2146	0.00268087	3.35e-124	-11.389	CRC
di_p1	High_Fiber	Blautia wexlerae AGR2146	0.00268087	1.64425e-293	-11.389	CRC
di_p1	High_protein	Blautia wexlerae AGR2146	0.00268087	8.64468e-262	-11.389	CRC
di_p1	Vegan	Blautia wexlerae AGR2146	0.00268087	7.35334e-293	-11.389	CRC
di_p1	Gluten_Free	Catenibacterium mitsuokai DSM 15897	0.00250294	6.6043e-264	-11.29	CRC
di_p1	High_fat	Catenibacterium mitsuokai DSM 15897	0.00250294	7.97e-122	-11.29	CRC
di_p1	High_Fiber	Catenibacterium mitsuokai DSM 15897	0.00250294	3.43961e-293	-11.29	CRC
di_p1	High_protein	Catenibacterium mitsuokai DSM 15897	0.00250294	2.60766e-259	-11.29	CRC
di_p1	Vegan	Catenibacterium mitsuokai DSM 15897	0.00250294	2.19927e-293	-11.29	CRC
di_p1	Gluten_Free	Clostridioides difficile 002 P50 2011	0.000711735	5.21069e-209	-9.47722	CRC
di_p1	High_fat	Clostridioides difficile 002 P50 2011	0.000711735	3.27e-80	-9.47722	CRC
di_p1	High_Fiber	Clostridioides difficile 002 P50 2011	0.000711735	4.44237e-254	-9.47722	CRC
di_p1	High_protein	Clostridioides difficile 002 P50 2011	0.000711735	8.74399e-190	-9.47722	CRC
di_p1	Mediterranean	Clostridioides difficile 002 P50 2011	0.000711735	1.42165e-273	-9.47722	CRC
di_p1	Vegan	Clostridioides difficile 002 P50 2011	0.000711735	6.54023e-218	-9.47722	CRC
di_p1	Gluten_Free	Clostridium acetobutylicum ATCC 824	0.00109133	5.45397e-260	-10.0932	CRC
di_p1	High_fat	Clostridium acetobutylicum ATCC 824	0.00109133	1.6e-118	-10.0932	CRC
di_p1	High_Fiber	Clostridium acetobutylicum ATCC 824	0.00109133	4.35026e-294	-10.0932	CRC
di_p1	High_protein	Clostridium acetobutylicum ATCC 824	0.00109133	1.71475e-255	-10.0932	CRC
di_p1	Vegan	Clostridium acetobutylicum ATCC 824	0.00109133	1.55526e-289	-10.0932	CRC
di_p1	Gluten_Free	Clostridium baratii 796 15	0.000142347	9.35256e-268	-7.16337	CRC
di_p1	High_fat	Clostridium baratii 796 15	0.000142347	2.26e-125	-7.16337	CRC
di_p1	High_Fiber	Clostridium baratii 796 15	0.000142347	8.74496e-293	-7.16337	CRC
di_p1	High_protein	Clostridium baratii 796 15	0.000142347	4.5901e-263	-7.16337	CRC
di_p1	Vegan	Clostridium baratii 796 15	0.000142347	3.90443e-293	-7.16337	CRC
di_p1	Gluten_Free	Clostridium beijerinckii G117	0.000272832	1.66146e-249	-8.09715	CRC
di_p1	High_fat	Clostridium beijerinckii G117	0.000272832	1.24e-109	-8.09715	CRC
di_p1	High_Fiber	Clostridium beijerinckii G117	0.000272832	1.56247e-293	-8.09715	CRC
di_p1	High_protein	Clostridium beijerinckii G117	0.000272832	2.89444e-245	-8.09715	CRC
di_p1	Mediterranean	Clostridium beijerinckii G117	0.000272832	2.73891e-293	-8.09715	CRC
di_p1	Vegan	Clostridium beijerinckii G117	0.000272832	3.16958e-279	-8.09715	CRC
di_p1	Gluten_Free	Clostridium botulinum A2 str Kyoto	0.00047449	0.00665668	3.80753	CRC
di_p1	High_fat	Clostridium botulinum A2 str Kyoto	0.00047449	0.00665668	3.80753	CRC
di_p1	High_Fiber	Clostridium botulinum A2 str Kyoto	0.00047449	0.00698934	3.87788	CRC
di_p1	High_protein	Clostridium botulinum A2 str Kyoto	0.00047449	0.00665668	3.80753	CRC
di_p1	Mediterranean	Clostridium botulinum A2 str Kyoto	0.00047449	0.00665668	3.80753	CRC
di_p1	Vegan	Clostridium botulinum A2 str Kyoto	0.00047449	0.00694565	3.86883	CRC
di_p1	Gluten_Free	Clostridium butyricum 5521	0.000130485	0.00183059	3.80013	CRC
di_p1	High_fat	Clostridium butyricum 5521	0.000130485	0.00183059	3.80013	CRC
di_p1	High_Fiber	Clostridium butyricum 5521	0.000130485	0.00192207	3.87044	CRC
di_p1	High_protein	Clostridium butyricum 5521	0.000130485	0.00183059	3.80013	CRC
di_p1	Mediterranean	Clostridium butyricum 5521	0.000130485	0.00183059	3.80013	CRC
di_p1	Vegan	Clostridium butyricum 5521	0.000130485	0.00191005	3.8614	CRC
di_p1	Gluten_Free	Clostridium hathewayi 12489931	0.00256225	1.68346e-266	-11.3238	CRC
di_p1	High_fat	Clostridium hathewayi 12489931	0.00256225	4.07e-124	-11.3238	CRC
di_p1	High_Fiber	Clostridium hathewayi 12489931	0.00256225	1.57162e-293	-11.3238	CRC
di_p1	High_protein	Clostridium hathewayi 12489931	0.00256225	8.26218e-262	-11.3238	CRC
di_p1	Vegan	Clostridium hathewayi 12489931	0.00256225	7.02797e-293	-11.3238	CRC
di_p1	Gluten_Free	Clostridium perfringens ATCC 13124	0.000782909	3.91263e-260	-9.61454	CRC
di_p1	High_fat	Clostridium perfringens ATCC 13124	0.000782909	1.15e-118	-9.61454	CRC
di_p1	High_Fiber	Clostridium perfringens ATCC 13124	0.000782909	3.12084e-293	-9.61454	CRC
di_p1	High_protein	Clostridium perfringens ATCC 13124	0.000782909	1.23015e-255	-9.61454	CRC
di_p1	Vegan	Clostridium perfringens ATCC 13124	0.000782909	1.11573e-289	-9.61454	CRC
di_p1	Gluten_Free	Clostridium scindens ATCC 35704	0.00154209	4.069e-264	-10.5916	CRC
di_p1	High_fat	Clostridium scindens ATCC 35704	0.00154209	4.91e-122	-10.5916	CRC
di_p1	High_Fiber	Clostridium scindens ATCC 35704	0.00154209	2.11919e-293	-10.5916	CRC
di_p1	High_protein	Clostridium scindens ATCC 35704	0.00154209	1.60662e-259	-10.5916	CRC
di_p1	Vegan	Clostridium scindens ATCC 35704	0.00154209	1.355e-293	-10.5916	CRC
di_p1	Gluten_Free	Collinsella aerofaciens ATCC 25986	0.000889669	2.3475e-264	-9.79875	CRC
di_p1	High_fat	Collinsella aerofaciens ATCC 25986	0.000889669	2.83e-122	-9.79875	CRC
di_p1	High_Fiber	Collinsella aerofaciens ATCC 25986	0.000889669	1.22261e-293	-9.79875	CRC
di_p1	High_protein	Collinsella aerofaciens ATCC 25986	0.000889669	9.26894e-260	-9.79875	CRC
di_p1	Vegan	Collinsella aerofaciens ATCC 25986	0.000889669	7.81732e-293	-9.79875	CRC
di_p1	Gluten_Free	Coprobacter fastidiosus NSB1	0.000177934	2.45986e-267	-7.48328	CRC
di_p1	High_fat	Coprobacter fastidiosus NSB1	0.000177934	4.11e-125	-7.48328	CRC
di_p1	High_Fiber	Coprobacter fastidiosus NSB1	0.000177934	2.57902e-293	-7.48328	CRC
di_p1	High_protein	Coprobacter fastidiosus NSB1	0.000177934	1.34241e-262	-7.48328	CRC
di_p1	Vegan	Coprobacter fastidiosus NSB1	0.000177934	1.24701e-294	-7.48328	CRC
di_p1	Gluten_Free	Coprococcus catus ERR2221258	0.00372475	5.14931e-266	-11.8633	CRC
di_p1	High_fat	Coprococcus catus ERR2221258	0.00372475	8.61e-124	-11.8633	CRC
di_p1	High_Fiber	Coprococcus catus ERR2221258	0.00372475	5.3947e-293	-11.8633	CRC
di_p1	High_protein	Coprococcus catus ERR2221258	0.00372475	2.81012e-261	-11.8633	CRC
di_p1	Vegan	Coprococcus catus ERR2221258	0.00372475	2.61041e-293	-11.8633	CRC
di_p1	Gluten_Free	Coprococcus comes ATCC 27758	0.0182323	2.69553e-261	-14.1543	CRC
di_p1	High_fat	Coprococcus comes ATCC 27758	0.0182323	6.99e-120	-14.1543	CRC
di_p1	High_Fiber	Coprococcus comes ATCC 27758	0.0182323	1.18145e-293	-14.1543	CRC
di_p1	High_protein	Coprococcus comes ATCC 27758	0.0182323	1.70516e-255	-14.1543	CRC
di_p1	Vegan	Coprococcus comes ATCC 27758	0.0182323	4.01916e-289	-14.1543	CRC
di_p1	Gluten_Free	Coprococcus eutactus ATCC 27759	0.00119809	3.80636e-162	-10.2277	CRC
di_p1	High_fat	Coprococcus eutactus ATCC 27759	0.00119809	3.71e-76	-10.2277	CRC
di_p1	High_Fiber	Coprococcus eutactus ATCC 27759	0.00119809	9.18357e-195	-10.2277	CRC
di_p1	High_protein	Coprococcus eutactus ATCC 27759	0.00119809	2.47536e-159	-10.2277	CRC
di_p1	Mediterranean	Coprococcus eutactus ATCC 27759	0.00119809	6.77852e-204	-10.2277	CRC
di_p1	Vegan	Coprococcus eutactus ATCC 27759	0.00119809	6.68516e-180	-10.2277	CRC
di_p1	Gluten_Free	Dialister succinatiphilus YIT 11850	0.000284694	3.93578e-267	-8.15833	CRC
di_p1	High_fat	Dialister succinatiphilus YIT 11850	0.000284694	6.58e-125	-8.15833	CRC
di_p1	High_Fiber	Dialister succinatiphilus YIT 11850	0.000284694	4.12545e-293	-8.15833	CRC
di_p1	High_protein	Dialister succinatiphilus YIT 11850	0.000284694	2.14786e-262	-8.15833	CRC
di_p1	Vegan	Dialister succinatiphilus YIT 11850	0.000284694	1.99522e-293	-8.15833	CRC
di_p1	Gluten_Free	Dielma fastidiosa JC13	0.0159547	1.04827e-265	-13.9618	CRC
di_p1	High_fat	Dielma fastidiosa JC13	0.0159547	1.99e-123	-13.9618	CRC
di_p1	High_Fiber	Dielma fastidiosa JC13	0.0159547	9.78497e-293	-13.9618	CRC
di_p1	High_protein	Dielma fastidiosa JC13	0.0159547	5.14473e-261	-13.9618	CRC
di_p1	Vegan	Dielma fastidiosa JC13	0.0159547	4.37622e-295	-13.9618	CRC
di_p1	Gluten_Free	Dorea formicigenerans 4 6 53AFAA	0.0016963	4.72094e-171	-10.729	CRC
di_p1	High_fat	Dorea formicigenerans 4 6 53AFAA	0.0016963	8.07e-49	-10.729	CRC
di_p1	High_Fiber	Dorea formicigenerans 4 6 53AFAA	0.0016963	2.58167e-136	-10.729	CRC
di_p1	High_protein	Dorea formicigenerans 4 6 53AFAA	0.0016963	1.2378e-123	-10.729	CRC
di_p1	Mediterranean	Dorea formicigenerans 4 6 53AFAA	0.0016963	2.54328e-49	-10.729	CRC
di_p1	Vegan	Dorea formicigenerans 4 6 53AFAA	0.0016963	2.13241e-178	-10.729	CRC
di_p1	Gluten_Free	Dorea longicatena DSM 13814	0.00227755	9.27624e-229	-11.1539	CRC
di_p1	High_fat	Dorea longicatena DSM 13814	0.00227755	2.64e-94	-11.1539	CRC
di_p1	High_Fiber	Dorea longicatena DSM 13814	0.00227755	1.30427e-247	-11.1539	CRC
di_p1	High_protein	Dorea longicatena DSM 13814	0.00227755	3.8232e-207	-11.1539	CRC
di_p1	Mediterranean	Dorea longicatena DSM 13814	0.00227755	3.05928e-222	-11.1539	CRC
di_p1	Vegan	Dorea longicatena DSM 13814	0.00227755	1.95989e-249	-11.1539	CRC
di_p1	Gluten_Free	Eisenbergiella nov ERR2221109	0.00233686	3.23062e-266	-11.191	CRC
di_p1	High_fat	Eisenbergiella nov ERR2221109	0.00233686	5.4e-124	-11.191	CRC
di_p1	High_Fiber	Eisenbergiella nov ERR2221109	0.00233686	3.38484e-293	-11.191	CRC
di_p1	High_protein	Eisenbergiella nov ERR2221109	0.00233686	1.76304e-261	-11.191	CRC
di_p1	Vegan	Eisenbergiella nov ERR2221109	0.00233686	1.63774e-293	-11.191	CRC
[truncated: 68,516 more rows]
